# Supplementary material for: Synthesis of a Candida albicans tetrasaccharide spanning the β1,2-mannan phosphodiester α-mannan junction
Source: Royal Society of Chemistry journal article supplement (doi:10.1039/c2ob26355f), 2012-01-01

**Synthesis of *Candida albicans*  $\beta$ 1,2-mannan phosphodiester  $\alpha$ -mannan junction**  
Anh-Thu Dang, Margaret A. Johnson and David R. Bundle\*

*Alberta Ingenuity Centre for Carbohydrate Science, Department of Chemistry, University of Alberta, Edmonton, Canada, T6G 2G2.*

*E-mail: [dave.bundle@ualberta.ca](mailto:dave.bundle@ualberta.ca);*

*Tel: (+1)780-492-8808*

*Fax: (+1)780-492-7705*

Index of Supplementary material

A PBD file for tetrasaccharide **1** bound to mAb C3.1 as shown in Fig 4

$^1\text{H}$  and  $^{13}\text{C}$  NMR spectra for compounds **3-13**, **16**, and **1**

### PBD file for tetrasaccharide 1 bound to mAb C3.1

|      |    |      |     |   |        |         |        |      |      |   |
|------|----|------|-----|---|--------|---------|--------|------|------|---|
| ATOM | 1  | N    | GLU | 1 | -3.679 | -19.895 | 8.044  | 1.00 | 0.00 | N |
| ATOM | 2  | CA   | GLU | 1 | -3.637 | -18.807 | 7.045  | 1.00 | 0.00 | C |
| ATOM | 3  | C    | GLU | 1 | -2.810 | -17.637 | 7.588  | 1.00 | 0.00 | C |
| ATOM | 4  | O    | GLU | 1 | -3.062 | -17.195 | 8.703  | 1.00 | 0.00 | O |
| ATOM | 5  | CB   | GLU | 1 | -5.039 | -18.337 | 6.647  | 1.00 | 0.00 | C |
| ATOM | 6  | CG   | GLU | 1 | -4.981 | -17.182 | 5.638  | 1.00 | 0.00 | C |
| ATOM | 7  | CD   | GLU | 1 | -6.385 | -16.787 | 5.193  | 1.00 | 0.00 | C |
| ATOM | 8  | OE1  | GLU | 1 | -7.082 | -16.138 | 6.004  | 1.00 | 0.00 | O |
| ATOM | 9  | OE2  | GLU | 1 | -6.744 | -17.168 | 4.058  | 1.00 | 0.00 | O |
| ATOM | 10 | HA   | GLU | 1 | -3.144 | -19.186 | 6.149  | 1.00 | 0.00 | H |
| ATOM | 11 | HB2  | GLU | 1 | -5.571 | -19.181 | 6.202  | 1.00 | 0.00 | H |
| ATOM | 12 | HB3  | GLU | 1 | -5.578 | -18.021 | 7.540  | 1.00 | 0.00 | H |
| ATOM | 13 | HG2  | GLU | 1 | -4.504 | -16.311 | 6.090  | 1.00 | 0.00 | H |
| ATOM | 14 | HG3  | GLU | 1 | -4.383 | -17.491 | 4.776  | 1.00 | 0.00 | H |
| ATOM | 15 | H1   | GLU | 1 | -3.884 | -19.513 | 8.958  | 1.00 | 0.00 | H |
| ATOM | 16 | H2   | GLU | 1 | -2.711 | -20.226 | 8.187  | 1.00 | 0.00 | H |
| ATOM | 17 | H3   | GLU | 1 | -4.264 | -20.667 | 7.785  | 1.00 | 0.00 | H |
| ATOM | 18 | N    | VAL | 2 | -1.849 | -17.153 | 6.804  | 1.00 | 0.00 | N |
| ATOM | 19 | CA   | VAL | 2 | -1.010 | -15.991 | 7.115  | 1.00 | 0.00 | C |
| ATOM | 20 | C    | VAL | 2 | -1.864 | -14.720 | 7.279  | 1.00 | 0.00 | C |
| ATOM | 21 | O    | VAL | 2 | -2.343 | -14.167 | 6.292  | 1.00 | 0.00 | O |
| ATOM | 22 | CB   | VAL | 2 | 0.123  | -15.825 | 6.063  | 1.00 | 0.00 | C |
| ATOM | 23 | CG1  | VAL | 2 | 1.178  | -16.928 | 6.251  | 1.00 | 0.00 | C |
| ATOM | 24 | CG2  | VAL | 2 | -0.332 | -15.848 | 4.588  | 1.00 | 0.00 | C |
| ATOM | 25 | H    | VAL | 2 | -1.671 | -17.651 | 5.947  | 1.00 | 0.00 | H |
| ATOM | 26 | HA   | VAL | 2 | -0.535 | -16.177 | 8.075  | 1.00 | 0.00 | H |
| ATOM | 27 | HB   | VAL | 2 | 0.617  | -14.876 | 6.231  | 1.00 | 0.00 | H |
| ATOM | 28 | HG11 | VAL | 2 | 0.742  | -17.909 | 6.063  | 1.00 | 0.00 | H |
| ATOM | 29 | HG12 | VAL | 2 | 2.007  | -16.770 | 5.557  | 1.00 | 0.00 | H |
| ATOM | 30 | HG13 | VAL | 2 | 1.573  | -16.894 | 7.268  | 1.00 | 0.00 | H |
| ATOM | 31 | HG21 | VAL | 2 | -1.006 | -15.020 | 4.377  | 1.00 | 0.00 | H |
| ATOM | 32 | HG22 | VAL | 2 | 0.535  | -15.741 | 3.935  | 1.00 | 0.00 | H |
| ATOM | 33 | HG23 | VAL | 2 | -0.833 | -16.787 | 4.349  | 1.00 | 0.00 | H |
| ATOM | 34 | N    | GLN | 3 | -2.059 | -14.239 | 8.520  | 1.00 | 0.00 | N |
| ATOM | 35 | CA   | GLN | 3 | -3.062 | -13.197 | 8.828  | 1.00 | 0.00 | C |
| ATOM | 36 | C    | GLN | 3 | -2.620 | -12.223 | 9.949  | 1.00 | 0.00 | C |
| ATOM | 37 | O    | GLN | 3 | -2.012 | -12.631 | 10.946 | 1.00 | 0.00 | O |
| ATOM | 38 | CB   | GLN | 3 | -4.395 | -13.910 | 9.155  | 1.00 | 0.00 | C |
| ATOM | 39 | CG   | GLN | 3 | -5.675 | -13.100 | 8.867  | 1.00 | 0.00 | C |
| ATOM | 40 | CD   | GLN | 3 | -5.998 | -11.988 | 9.868  | 1.00 | 0.00 | C |
| ATOM | 41 | NE2  | GLN | 3 | -6.834 | -11.042 | 9.498  | 1.00 | 0.00 | N |
| ATOM | 42 | OE1  | GLN | 3 | -5.508 | -11.925 | 10.984 | 1.00 | 0.00 | O |
| ATOM | 43 | H    | GLN | 3 | -1.729 | -14.804 | 9.298  | 1.00 | 0.00 | H |
| ATOM | 44 | HA   | GLN | 3 | -3.215 | -12.598 | 7.930  | 1.00 | 0.00 | H |
| ATOM | 45 | HB2  | GLN | 3 | -4.466 | -14.800 | 8.529  | 1.00 | 0.00 | H |
| ATOM | 46 | HB3  | GLN | 3 | -4.391 | -14.248 | 10.192 | 1.00 | 0.00 | H |
| ATOM | 47 | HG2  | GLN | 3 | -5.601 | -12.669 | 7.870  | 1.00 | 0.00 | H |
| ATOM | 48 | HG3  | GLN | 3 | -6.520 | -13.790 | 8.856  | 1.00 | 0.00 | H |
| ATOM | 49 | HE21 | GLN | 3 | -6.937 | -10.288 | 10.153 | 1.00 | 0.00 | H |
| ATOM | 50 | HE22 | GLN | 3 | -7.258 | -11.051 | 8.588  | 1.00 | 0.00 | H |
| ATOM | 51 | N    | LEU | 4 | -2.928 | -10.923 | 9.778  | 1.00 | 0.00 | N |
| ATOM | 52 | CA   | LEU | 4 | -2.681 | -9.841  | 10.747 | 1.00 | 0.00 | C |
| ATOM | 53 | C    | LEU | 4 | -3.980 | -9.089  | 11.121 | 1.00 | 0.00 | C |

|      |     |      |     |   |        |         |        |      |      |   |
|------|-----|------|-----|---|--------|---------|--------|------|------|---|
| ATOM | 54  | O    | LEU | 4 | -4.853 | -8.851  | 10.280 | 1.00 | 0.00 | O |
| ATOM | 55  | CB   | LEU | 4 | -1.660 | -8.823  | 10.178 | 1.00 | 0.00 | C |
| ATOM | 56  | CG   | LEU | 4 | -0.164 | -9.165  | 10.343 | 1.00 | 0.00 | C |
| ATOM | 57  | CD1  | LEU | 4 | 0.295  | -10.350 | 9.489  | 1.00 | 0.00 | C |
| ATOM | 58  | CD2  | LEU | 4 | 0.697  | -7.953  | 9.959  | 1.00 | 0.00 | C |
| ATOM | 59  | H    | LEU | 4 | -3.475 | -10.666 | 8.971  | 1.00 | 0.00 | H |
| ATOM | 60  | HA   | LEU | 4 | -2.284 | -10.263 | 11.672 | 1.00 | 0.00 | H |
| ATOM | 61  | HB2  | LEU | 4 | -1.880 | -8.643  | 9.122  | 1.00 | 0.00 | H |
| ATOM | 62  | HB3  | LEU | 4 | -1.822 | -7.875  | 10.695 | 1.00 | 0.00 | H |
| ATOM | 63  | HG   | LEU | 4 | 0.033  | -9.393  | 11.389 | 1.00 | 0.00 | H |
| ATOM | 64  | HD11 | LEU | 4 | -0.017 | -10.199 | 8.456  | 1.00 | 0.00 | H |
| ATOM | 65  | HD12 | LEU | 4 | 1.380  | -10.437 | 9.524  | 1.00 | 0.00 | H |
| ATOM | 66  | HD13 | LEU | 4 | -0.122 | -11.275 | 9.874  | 1.00 | 0.00 | H |
| ATOM | 67  | HD21 | LEU | 4 | 0.528  | -7.153  | 10.674 | 1.00 | 0.00 | H |
| ATOM | 68  | HD22 | LEU | 4 | 1.754  | -8.215  | 9.992  | 1.00 | 0.00 | H |
| ATOM | 69  | HD23 | LEU | 4 | 0.444  | -7.613  | 8.954  | 1.00 | 0.00 | H |
| ATOM | 70  | N    | GLN | 5 | -4.045 | -8.636  | 12.378 | 1.00 | 0.00 | N |
| ATOM | 71  | CA   | GLN | 5 | -5.164 | -7.882  | 12.946 | 1.00 | 0.00 | C |
| ATOM | 72  | C    | GLN | 5 | -4.665 | -6.594  | 13.630 | 1.00 | 0.00 | C |
| ATOM | 73  | O    | GLN | 5 | -3.995 | -6.661  | 14.666 | 1.00 | 0.00 | O |
| ATOM | 74  | CB   | GLN | 5 | -5.886 | -8.808  | 13.949 | 1.00 | 0.00 | C |
| ATOM | 75  | CG   | GLN | 5 | -7.092 | -8.190  | 14.681 | 1.00 | 0.00 | C |
| ATOM | 76  | CD   | GLN | 5 | -8.275 | -7.910  | 13.759 | 1.00 | 0.00 | C |
| ATOM | 77  | NE2  | GLN | 5 | -8.636 | -6.664  | 13.545 | 1.00 | 0.00 | N |
| ATOM | 78  | OE1  | GLN | 5 | -8.867 | -8.813  | 13.184 | 1.00 | 0.00 | O |
| ATOM | 79  | H    | GLN | 5 | -3.277 | -8.854  | 12.998 | 1.00 | 0.00 | H |
| ATOM | 80  | HA   | GLN | 5 | -5.864 | -7.596  | 12.159 | 1.00 | 0.00 | H |
| ATOM | 81  | HB2  | GLN | 5 | -6.226 | -9.701  | 13.418 | 1.00 | 0.00 | H |
| ATOM | 82  | HB3  | GLN | 5 | -5.168 | -9.132  | 14.704 | 1.00 | 0.00 | H |
| ATOM | 83  | HG2  | GLN | 5 | -7.428 | -8.887  | 15.448 | 1.00 | 0.00 | H |
| ATOM | 84  | HG3  | GLN | 5 | -6.788 | -7.274  | 15.188 | 1.00 | 0.00 | H |
| ATOM | 85  | HE21 | GLN | 5 | -9.385 | -6.512  | 12.876 | 1.00 | 0.00 | H |
| ATOM | 86  | HE22 | GLN | 5 | -8.136 | -5.888  | 13.976 | 1.00 | 0.00 | H |
| ATOM | 87  | N    | GLU | 6 | -5.025 | -5.431  | 13.071 | 1.00 | 0.00 | N |
| ATOM | 88  | CA   | GLU | 6 | -4.927 | -4.120  | 13.717 | 1.00 | 0.00 | C |
| ATOM | 89  | C    | GLU | 6 | -6.044 | -3.885  | 14.752 | 1.00 | 0.00 | C |
| ATOM | 90  | O    | GLU | 6 | -7.088 | -4.540  | 14.751 | 1.00 | 0.00 | O |
| ATOM | 91  | CB   | GLU | 6 | -4.967 | -2.985  | 12.676 | 1.00 | 0.00 | C |
| ATOM | 92  | CG   | GLU | 6 | -3.809 | -2.993  | 11.669 | 1.00 | 0.00 | C |
| ATOM | 93  | CD   | GLU | 6 | -4.094 | -3.728  | 10.363 | 1.00 | 0.00 | C |
| ATOM | 94  | OE1  | GLU | 6 | -4.778 | -4.773  | 10.361 | 1.00 | 0.00 | O |
| ATOM | 95  | OE2  | GLU | 6 | -3.600 | -3.250  | 9.320  | 1.00 | 0.00 | O |
| ATOM | 96  | H    | GLU | 6 | -5.353 | -5.431  | 12.106 | 1.00 | 0.00 | H |
| ATOM | 97  | HA   | GLU | 6 | -3.971 | -4.060  | 14.237 | 1.00 | 0.00 | H |
| ATOM | 98  | HB2  | GLU | 6 | -5.921 | -2.981  | 12.150 | 1.00 | 0.00 | H |
| ATOM | 99  | HB3  | GLU | 6 | -4.886 | -2.046  | 13.223 | 1.00 | 0.00 | H |
| ATOM | 100 | HG2  | GLU | 6 | -3.588 | -1.955  | 11.417 | 1.00 | 0.00 | H |
| ATOM | 101 | HG3  | GLU | 6 | -2.917 | -3.410  | 12.134 | 1.00 | 0.00 | H |
| ATOM | 102 | N    | SER | 7 | -5.819 | -2.911  | 15.637 | 1.00 | 0.00 | N |
| ATOM | 103 | CA   | SER | 7 | -6.649 | -2.533  | 16.786 | 1.00 | 0.00 | C |
| ATOM | 104 | C    | SER | 7 | -6.125 | -1.224  | 17.437 | 1.00 | 0.00 | C |
| ATOM | 105 | O    | SER | 7 | -5.053 | -0.723  | 17.075 | 1.00 | 0.00 | O |
| ATOM | 106 | CB   | SER | 7 | -6.654 | -3.688  | 17.809 | 1.00 | 0.00 | C |
| ATOM | 107 | OG   | SER | 7 | -5.384 | -3.849  | 18.415 | 1.00 | 0.00 | O |
| ATOM | 108 | H    | SER | 7 | -4.908 | -2.471  | 15.622 | 1.00 | 0.00 | H |
| ATOM | 109 | HA   | SER | 7 | -7.672 | -2.377  | 16.446 | 1.00 | 0.00 | H |
| ATOM | 110 | HB2  | SER | 7 | -7.389 | -3.481  | 18.587 | 1.00 | 0.00 | H |

|      |     |      |     |    |         |        |        |      |      |   |
|------|-----|------|-----|----|---------|--------|--------|------|------|---|
| ATOM | 111 | HB3  | SER | 7  | -6.940  | -4.618 | 17.315 | 1.00 | 0.00 | H |
| ATOM | 112 | HG   | SER | 7  | -4.696  | -3.797 | 17.721 | 1.00 | 0.00 | H |
| ATOM | 113 | N    | GLY | 8  | -6.837  | -0.662 | 18.425 | 1.00 | 0.00 | N |
| ATOM | 114 | CA   | GLY | 8  | -6.301  | 0.363  | 19.343 | 1.00 | 0.00 | C |
| ATOM | 115 | C    | GLY | 8  | -6.337  | 1.826  | 18.875 | 1.00 | 0.00 | C |
| ATOM | 116 | O    | GLY | 8  | -6.036  | 2.706  | 19.679 | 1.00 | 0.00 | O |
| ATOM | 117 | H    | GLY | 8  | -7.710  | -1.098 | 18.689 | 1.00 | 0.00 | H |
| ATOM | 118 | HA2  | GLY | 8  | -6.865  | 0.325  | 20.274 | 1.00 | 0.00 | H |
| ATOM | 119 | HA3  | GLY | 8  | -5.256  | 0.133  | 19.551 | 1.00 | 0.00 | H |
| ATOM | 120 | N    | GLY | 9  | -6.702  | 2.111  | 17.619 | 1.00 | 0.00 | N |
| ATOM | 121 | CA   | GLY | 9  | -6.948  | 3.473  | 17.111 | 1.00 | 0.00 | C |
| ATOM | 122 | C    | GLY | 9  | -8.430  | 3.857  | 17.113 | 1.00 | 0.00 | C |
| ATOM | 123 | O    | GLY | 9  | -9.274  | 3.066  | 17.530 | 1.00 | 0.00 | O |
| ATOM | 124 | H    | GLY | 9  | -6.947  | 1.338  | 17.023 | 1.00 | 0.00 | H |
| ATOM | 125 | HA2  | GLY | 9  | -6.415  | 4.204  | 17.719 | 1.00 | 0.00 | H |
| ATOM | 126 | HA3  | GLY | 9  | -6.596  | 3.555  | 16.084 | 1.00 | 0.00 | H |
| ATOM | 127 | N    | GLY | 10 | -8.750  | 5.059  | 16.618 | 1.00 | 0.00 | N |
| ATOM | 128 | CA   | GLY | 10 | -10.131 | 5.541  | 16.496 | 1.00 | 0.00 | C |
| ATOM | 129 | C    | GLY | 10 | -10.226 | 7.049  | 16.283 | 1.00 | 0.00 | C |
| ATOM | 130 | O    | GLY | 10 | -10.144 | 7.522  | 15.154 | 1.00 | 0.00 | O |
| ATOM | 131 | H    | GLY | 10 | -8.010  | 5.654  | 16.270 | 1.00 | 0.00 | H |
| ATOM | 132 | HA2  | GLY | 10 | -10.589 | 5.055  | 15.635 | 1.00 | 0.00 | H |
| ATOM | 133 | HA3  | GLY | 10 | -10.706 | 5.254  | 17.376 | 1.00 | 0.00 | H |
| ATOM | 134 | N    | LEU | 11 | -10.429 | 7.809  | 17.365 | 1.00 | 0.00 | N |
| ATOM | 135 | CA   | LEU | 11 | -10.611 | 9.264  | 17.327 | 1.00 | 0.00 | C |
| ATOM | 136 | C    | LEU | 11 | -9.920  | 9.917  | 18.530 | 1.00 | 0.00 | C |
| ATOM | 137 | O    | LEU | 11 | -10.023 | 9.397  | 19.636 | 1.00 | 0.00 | O |
| ATOM | 138 | CB   | LEU | 11 | -12.126 | 9.553  | 17.231 | 1.00 | 0.00 | C |
| ATOM | 139 | CG   | LEU | 11 | -12.537 | 11.032 | 17.034 | 1.00 | 0.00 | C |
| ATOM | 140 | CD1  | LEU | 11 | -13.881 | 11.095 | 16.289 | 1.00 | 0.00 | C |
| ATOM | 141 | CD2  | LEU | 11 | -12.690 | 11.787 | 18.364 | 1.00 | 0.00 | C |
| ATOM | 142 | H    | LEU | 11 | -10.460 | 7.370  | 18.273 | 1.00 | 0.00 | H |
| ATOM | 143 | HA   | LEU | 11 | -10.132 | 9.636  | 16.427 | 1.00 | 0.00 | H |
| ATOM | 144 | HB2  | LEU | 11 | -12.495 | 8.988  | 16.374 | 1.00 | 0.00 | H |
| ATOM | 145 | HB3  | LEU | 11 | -12.627 | 9.156  | 18.115 | 1.00 | 0.00 | H |
| ATOM | 146 | HG   | LEU | 11 | -11.792 | 11.537 | 16.420 | 1.00 | 0.00 | H |
| ATOM | 147 | HD11 | LEU | 11 | -14.657 | 10.590 | 16.870 | 1.00 | 0.00 | H |
| ATOM | 148 | HD12 | LEU | 11 | -14.170 | 12.134 | 16.132 | 1.00 | 0.00 | H |
| ATOM | 149 | HD13 | LEU | 11 | -13.792 | 10.611 | 15.317 | 1.00 | 0.00 | H |
| ATOM | 150 | HD21 | LEU | 11 | -11.740 | 11.856 | 18.884 | 1.00 | 0.00 | H |
| ATOM | 151 | HD22 | LEU | 11 | -13.045 | 12.801 | 18.173 | 1.00 | 0.00 | H |
| ATOM | 152 | HD23 | LEU | 11 | -13.412 | 11.277 | 19.005 | 1.00 | 0.00 | H |
| ATOM | 153 | N    | VAL | 12 | -9.222  | 11.035 | 18.307 | 1.00 | 0.00 | N |
| ATOM | 154 | CA   | VAL | 12 | -8.453  | 11.814 | 19.311 | 1.00 | 0.00 | C |
| ATOM | 155 | C    | VAL | 12 | -8.244  | 13.256 | 18.821 | 1.00 | 0.00 | C |
| ATOM | 156 | O    | VAL | 12 | -8.554  | 13.545 | 17.672 | 1.00 | 0.00 | O |
| ATOM | 157 | CB   | VAL | 12 | -7.069  | 11.196 | 19.647 | 1.00 | 0.00 | C |
| ATOM | 158 | CG1  | VAL | 12 | -7.147  | 9.982  | 20.581 | 1.00 | 0.00 | C |
| ATOM | 159 | CG2  | VAL | 12 | -6.260  | 10.842 | 18.390 | 1.00 | 0.00 | C |
| ATOM | 160 | H    | VAL | 12 | -9.246  | 11.413 | 17.359 | 1.00 | 0.00 | H |
| ATOM | 161 | HA   | VAL | 12 | -9.037  | 11.868 | 20.230 | 1.00 | 0.00 | H |
| ATOM | 162 | HB   | VAL | 12 | -6.502  | 11.947 | 20.200 | 1.00 | 0.00 | H |
| ATOM | 163 | HG11 | VAL | 12 | -7.567  | 9.130  | 20.053 | 1.00 | 0.00 | H |
| ATOM | 164 | HG12 | VAL | 12 | -6.146  | 9.717  | 20.921 | 1.00 | 0.00 | H |
| ATOM | 165 | HG13 | VAL | 12 | -7.763  | 10.217 | 21.449 | 1.00 | 0.00 | H |
| ATOM | 166 | HG21 | VAL | 12 | -6.158  | 11.721 | 17.751 | 1.00 | 0.00 | H |
| ATOM | 167 | HG22 | VAL | 12 | -5.268  | 10.503 | 18.684 | 1.00 | 0.00 | H |

|      |     |      |     |    |         |        |        |      |      |   |
|------|-----|------|-----|----|---------|--------|--------|------|------|---|
| ATOM | 168 | HG23 | VAL | 12 | -6.750  | 10.046 | 17.828 | 1.00 | 0.00 | H |
| ATOM | 169 | N    | GLN | 13 | -7.731  | 14.161 | 19.665 | 1.00 | 0.00 | N |
| ATOM | 170 | CA   | GLN | 13 | -7.584  | 15.583 | 19.326 | 1.00 | 0.00 | C |
| ATOM | 171 | C    | GLN | 13 | -6.196  | 15.978 | 18.772 | 1.00 | 0.00 | C |
| ATOM | 172 | O    | GLN | 13 | -5.201  | 15.312 | 19.088 | 1.00 | 0.00 | O |
| ATOM | 173 | CB   | GLN | 13 | -7.923  | 16.448 | 20.551 | 1.00 | 0.00 | C |
| ATOM | 174 | CG   | GLN | 13 | -9.348  | 16.214 | 21.080 | 1.00 | 0.00 | C |
| ATOM | 175 | CD   | GLN | 13 | -9.806  | 17.383 | 21.943 | 1.00 | 0.00 | C |
| ATOM | 176 | NE2  | GLN | 13 | -10.207 | 18.483 | 21.343 | 1.00 | 0.00 | N |
| ATOM | 177 | OE1  | GLN | 13 | -9.791  | 17.344 | 23.163 | 1.00 | 0.00 | O |
| ATOM | 178 | H    | GLN | 13 | -7.471  | 13.873 | 20.595 | 1.00 | 0.00 | H |
| ATOM | 179 | HA   | GLN | 13 | -8.308  | 15.805 | 18.552 | 1.00 | 0.00 | H |
| ATOM | 180 | HB2  | GLN | 13 | -7.206  | 16.257 | 21.350 | 1.00 | 0.00 | H |
| ATOM | 181 | HB3  | GLN | 13 | -7.828  | 17.494 | 20.261 | 1.00 | 0.00 | H |
| ATOM | 182 | HG2  | GLN | 13 | -10.043 | 16.113 | 20.247 | 1.00 | 0.00 | H |
| ATOM | 183 | HG3  | GLN | 13 | -9.379  | 15.295 | 21.666 | 1.00 | 0.00 | H |
| ATOM | 184 | HE21 | GLN | 13 | -10.509 | 19.234 | 21.934 | 1.00 | 0.00 | H |
| ATOM | 185 | HE22 | GLN | 13 | -10.302 | 18.496 | 20.335 | 1.00 | 0.00 | H |
| ATOM | 186 | N    | PRO | 14 | -6.101  | 17.083 | 17.990 | 1.00 | 0.00 | N |
| ATOM | 187 | CA   | PRO | 14 | -4.847  | 17.723 | 17.601 | 1.00 | 0.00 | C |
| ATOM | 188 | C    | PRO | 14 | -3.946  | 18.035 | 18.796 | 1.00 | 0.00 | C |
| ATOM | 189 | O    | PRO | 14 | -4.410  | 18.386 | 19.882 | 1.00 | 0.00 | O |
| ATOM | 190 | CB   | PRO | 14 | -5.218  | 19.021 | 16.877 | 1.00 | 0.00 | C |
| ATOM | 191 | CG   | PRO | 14 | -6.613  | 18.749 | 16.333 | 1.00 | 0.00 | C |
| ATOM | 192 | CD   | PRO | 14 | -7.212  | 17.793 | 17.363 | 1.00 | 0.00 | C |
| ATOM | 193 | HA   | PRO | 14 | -4.328  | 17.059 | 16.907 | 1.00 | 0.00 | H |
| ATOM | 194 | HB2  | PRO | 14 | -5.272  | 19.848 | 17.588 | 1.00 | 0.00 | H |
| ATOM | 195 | HB3  | PRO | 14 | -4.512  | 19.253 | 16.080 | 1.00 | 0.00 | H |
| ATOM | 196 | HG2  | PRO | 14 | -7.199  | 19.664 | 16.246 | 1.00 | 0.00 | H |
| ATOM | 197 | HG3  | PRO | 14 | -6.536  | 18.258 | 15.365 | 1.00 | 0.00 | H |
| ATOM | 198 | HD2  | PRO | 14 | -7.765  | 18.358 | 18.114 | 1.00 | 0.00 | H |
| ATOM | 199 | HD3  | PRO | 14 | -7.872  | 17.096 | 16.850 | 1.00 | 0.00 | H |
| ATOM | 200 | N    | GLY | 15 | -2.636  | 17.904 | 18.580 | 1.00 | 0.00 | N |
| ATOM | 201 | CA   | GLY | 15 | -1.602  | 18.033 | 19.607 | 1.00 | 0.00 | C |
| ATOM | 202 | C    | GLY | 15 | -1.474  | 16.794 | 20.497 | 1.00 | 0.00 | C |
| ATOM | 203 | O    | GLY | 15 | -0.385  | 16.539 | 21.010 | 1.00 | 0.00 | O |
| ATOM | 204 | H    | GLY | 15 | -2.339  | 17.658 | 17.640 | 1.00 | 0.00 | H |
| ATOM | 205 | HA2  | GLY | 15 | -0.641  | 18.205 | 19.125 | 1.00 | 0.00 | H |
| ATOM | 206 | HA3  | GLY | 15 | -1.850  | 18.873 | 20.258 | 1.00 | 0.00 | H |
| ATOM | 207 | N    | GLY | 16 | -2.550  | 16.009 | 20.639 | 1.00 | 0.00 | N |
| ATOM | 208 | CA   | GLY | 16 | -2.631  | 14.827 | 21.500 | 1.00 | 0.00 | C |
| ATOM | 209 | C    | GLY | 16 | -1.867  | 13.608 | 20.979 | 1.00 | 0.00 | C |
| ATOM | 210 | O    | GLY | 16 | -1.056  | 13.691 | 20.052 | 1.00 | 0.00 | O |
| ATOM | 211 | H    | GLY | 16 | -3.395  | 16.286 | 20.151 | 1.00 | 0.00 | H |
| ATOM | 212 | HA2  | GLY | 16 | -2.232  | 15.072 | 22.485 | 1.00 | 0.00 | H |
| ATOM | 213 | HA3  | GLY | 16 | -3.679  | 14.544 | 21.600 | 1.00 | 0.00 | H |
| ATOM | 214 | N    | SER | 17 | -2.131  | 12.465 | 21.610 | 1.00 | 0.00 | N |
| ATOM | 215 | CA   | SER | 17 | -1.407  | 11.210 | 21.385 | 1.00 | 0.00 | C |
| ATOM | 216 | C    | SER | 17 | -2.341  | 9.994  | 21.326 | 1.00 | 0.00 | C |
| ATOM | 217 | O    | SER | 17 | -3.478  | 10.045 | 21.792 | 1.00 | 0.00 | O |
| ATOM | 218 | CB   | SER | 17 | -0.365  | 10.978 | 22.494 | 1.00 | 0.00 | C |
| ATOM | 219 | OG   | SER | 17 | 0.662   | 11.951 | 22.456 | 1.00 | 0.00 | O |
| ATOM | 220 | H    | SER | 17 | -2.883  | 12.445 | 22.280 | 1.00 | 0.00 | H |
| ATOM | 221 | HA   | SER | 17 | -0.884  | 11.272 | 20.434 | 1.00 | 0.00 | H |
| ATOM | 222 | HB2  | SER | 17 | -0.856  | 11.009 | 23.468 | 1.00 | 0.00 | H |
| ATOM | 223 | HB3  | SER | 17 | 0.084   | 9.992  | 22.363 | 1.00 | 0.00 | H |
| ATOM | 224 | HG   | SER | 17 | 1.516   | 11.491 | 22.561 | 1.00 | 0.00 | H |

|      |     |      |     |    |        |        |        |      |      |   |
|------|-----|------|-----|----|--------|--------|--------|------|------|---|
| ATOM | 225 | N    | MET | 18 | -1.835 | 8.875  | 20.791 | 1.00 | 0.00 | N |
| ATOM | 226 | CA   | MET | 18 | -2.533 | 7.585  | 20.705 | 1.00 | 0.00 | C |
| ATOM | 227 | C    | MET | 18 | -1.528 | 6.429  | 20.544 | 1.00 | 0.00 | C |
| ATOM | 228 | O    | MET | 18 | -0.315 | 6.643  | 20.453 | 1.00 | 0.00 | O |
| ATOM | 229 | CB   | MET | 18 | -3.580 | 7.628  | 19.569 | 1.00 | 0.00 | C |
| ATOM | 230 | CG   | MET | 18 | -4.855 | 6.851  | 19.917 | 1.00 | 0.00 | C |
| ATOM | 231 | SD   | MET | 18 | -6.130 | 6.914  | 18.633 | 1.00 | 0.00 | S |
| ATOM | 232 | CE   | MET | 18 | -7.505 | 6.266  | 19.618 | 1.00 | 0.00 | C |
| ATOM | 233 | H    | MET | 18 | -0.881 | 8.913  | 20.442 | 1.00 | 0.00 | H |
| ATOM | 234 | HA   | MET | 18 | -3.058 | 7.436  | 21.649 | 1.00 | 0.00 | H |
| ATOM | 235 | HB2  | MET | 18 | -3.880 | 8.662  | 19.387 | 1.00 | 0.00 | H |
| ATOM | 236 | HB3  | MET | 18 | -3.145 | 7.240  | 18.648 | 1.00 | 0.00 | H |
| ATOM | 237 | HG2  | MET | 18 | -4.627 | 5.804  | 20.109 | 1.00 | 0.00 | H |
| ATOM | 238 | HG3  | MET | 18 | -5.277 | 7.285  | 20.827 | 1.00 | 0.00 | H |
| ATOM | 239 | HE1  | MET | 18 | -7.625 | 6.865  | 20.523 | 1.00 | 0.00 | H |
| ATOM | 240 | HE2  | MET | 18 | -8.430 | 6.319  | 19.047 | 1.00 | 0.00 | H |
| ATOM | 241 | HE3  | MET | 18 | -7.309 | 5.227  | 19.896 | 1.00 | 0.00 | H |
| ATOM | 242 | N    | LYS | 19 | -2.012 | 5.179  | 20.498 | 1.00 | 0.00 | N |
| ATOM | 243 | CA   | LYS | 19 | -1.170 | 3.983  | 20.332 | 1.00 | 0.00 | C |
| ATOM | 244 | C    | LYS | 19 | -1.882 | 2.841  | 19.576 | 1.00 | 0.00 | C |
| ATOM | 245 | O    | LYS | 19 | -2.624 | 2.054  | 20.165 | 1.00 | 0.00 | O |
| ATOM | 246 | CB   | LYS | 19 | -0.632 | 3.542  | 21.707 | 1.00 | 0.00 | C |
| ATOM | 247 | CG   | LYS | 19 | 0.451  | 2.463  | 21.557 | 1.00 | 0.00 | C |
| ATOM | 248 | CD   | LYS | 19 | 1.047  | 2.080  | 22.918 | 1.00 | 0.00 | C |
| ATOM | 249 | CE   | LYS | 19 | 2.117  | 1.004  | 22.694 | 1.00 | 0.00 | C |
| ATOM | 250 | NZ   | LYS | 19 | 2.797  | 0.586  | 23.943 | 1.00 | 0.00 | N |
| ATOM | 251 | H    | LYS | 19 | -3.009 | 5.040  | 20.579 | 1.00 | 0.00 | H |
| ATOM | 252 | HA   | LYS | 19 | -0.314 | 4.266  | 19.726 | 1.00 | 0.00 | H |
| ATOM | 253 | HB2  | LYS | 19 | -0.200 | 4.403  | 22.217 | 1.00 | 0.00 | H |
| ATOM | 254 | HB3  | LYS | 19 | -1.452 | 3.160  | 22.315 | 1.00 | 0.00 | H |
| ATOM | 255 | HG2  | LYS | 19 | 0.022  | 1.571  | 21.094 | 1.00 | 0.00 | H |
| ATOM | 256 | HG3  | LYS | 19 | 1.247  | 2.840  | 20.912 | 1.00 | 0.00 | H |
| ATOM | 257 | HD2  | LYS | 19 | 1.490  | 2.962  | 23.381 | 1.00 | 0.00 | H |
| ATOM | 258 | HD3  | LYS | 19 | 0.253  | 1.692  | 23.561 | 1.00 | 0.00 | H |
| ATOM | 259 | HE2  | LYS | 19 | 1.638  | 0.138  | 22.228 | 1.00 | 0.00 | H |
| ATOM | 260 | HE3  | LYS | 19 | 2.858  | 1.396  | 21.988 | 1.00 | 0.00 | H |
| ATOM | 261 | HZ1  | LYS | 19 | 2.123  | 0.235  | 24.611 | 1.00 | 0.00 | H |
| ATOM | 262 | HZ2  | LYS | 19 | 3.464  | -0.151 | 23.748 | 1.00 | 0.00 | H |
| ATOM | 263 | HZ3  | LYS | 19 | 3.293  | 1.370  | 24.350 | 1.00 | 0.00 | H |
| ATOM | 264 | N    | LEU | 20 | -1.660 | 2.761  | 18.262 | 1.00 | 0.00 | N |
| ATOM | 265 | CA   | LEU | 20 | -2.160 | 1.690  | 17.392 | 1.00 | 0.00 | C |
| ATOM | 266 | C    | LEU | 20 | -1.476 | 0.361  | 17.737 | 1.00 | 0.00 | C |
| ATOM | 267 | O    | LEU | 20 | -0.266 | 0.329  | 17.973 | 1.00 | 0.00 | O |
| ATOM | 268 | CB   | LEU | 20 | -1.902 | 2.043  | 15.914 | 1.00 | 0.00 | C |
| ATOM | 269 | CG   | LEU | 20 | -2.364 | 3.440  | 15.452 | 1.00 | 0.00 | C |
| ATOM | 270 | CD1  | LEU | 20 | -2.065 | 3.617  | 13.958 | 1.00 | 0.00 | C |
| ATOM | 271 | CD2  | LEU | 20 | -3.859 | 3.667  | 15.714 | 1.00 | 0.00 | C |
| ATOM | 272 | H    | LEU | 20 | -0.965 | 3.383  | 17.871 | 1.00 | 0.00 | H |
| ATOM | 273 | HA   | LEU | 20 | -3.234 | 1.576  | 17.554 | 1.00 | 0.00 | H |
| ATOM | 274 | HB2  | LEU | 20 | -0.832 | 1.959  | 15.727 | 1.00 | 0.00 | H |
| ATOM | 275 | HB3  | LEU | 20 | -2.399 | 1.290  | 15.300 | 1.00 | 0.00 | H |
| ATOM | 276 | HG   | LEU | 20 | -1.799 | 4.198  | 15.997 | 1.00 | 0.00 | H |
| ATOM | 277 | HD11 | LEU | 20 | -2.626 | 2.888  | 13.375 | 1.00 | 0.00 | H |
| ATOM | 278 | HD12 | LEU | 20 | -2.345 | 4.624  | 13.643 | 1.00 | 0.00 | H |
| ATOM | 279 | HD13 | LEU | 20 | -0.999 | 3.479  | 13.775 | 1.00 | 0.00 | H |
| ATOM | 280 | HD21 | LEU | 20 | -4.061 | 3.627  | 16.782 | 1.00 | 0.00 | H |
| ATOM | 281 | HD22 | LEU | 20 | -4.148 | 4.652  | 15.351 | 1.00 | 0.00 | H |

|      |     |      |     |    |        |         |        |      |      |   |
|------|-----|------|-----|----|--------|---------|--------|------|------|---|
| ATOM | 282 | HD23 | LEU | 20 | -4.448 | 2.906   | 15.201 | 1.00 | 0.00 | H |
| ATOM | 283 | N    | SER | 21 | -2.224 | -0.736  | 17.755 | 1.00 | 0.00 | N |
| ATOM | 284 | CA   | SER | 21 | -1.692 | -2.046  | 18.145 | 1.00 | 0.00 | C |
| ATOM | 285 | C    | SER | 21 | -2.097 | -3.106  | 17.123 | 1.00 | 0.00 | C |
| ATOM | 286 | O    | SER | 21 | -3.281 | -3.262  | 16.832 | 1.00 | 0.00 | O |
| ATOM | 287 | CB   | SER | 21 | -2.194 | -2.433  | 19.545 | 1.00 | 0.00 | C |
| ATOM | 288 | OG   | SER | 21 | -1.812 | -1.460  | 20.509 | 1.00 | 0.00 | O |
| ATOM | 289 | H    | SER | 21 | -3.202 | -0.688  | 17.470 | 1.00 | 0.00 | H |
| ATOM | 290 | HA   | SER | 21 | -0.604 | -2.024  | 18.189 | 1.00 | 0.00 | H |
| ATOM | 291 | HB2  | SER | 21 | -3.282 | -2.522  | 19.533 | 1.00 | 0.00 | H |
| ATOM | 292 | HB3  | SER | 21 | -1.769 | -3.400  | 19.822 | 1.00 | 0.00 | H |
| ATOM | 293 | HG   | SER | 21 | -2.388 | -0.693  | 20.399 | 1.00 | 0.00 | H |
| ATOM | 294 | N    | CYS | 22 | -1.123 | -3.830  | 16.566 | 1.00 | 0.00 | N |
| ATOM | 295 | CA   | CYS | 22 | -1.376 | -4.947  | 15.657 | 1.00 | 0.00 | C |
| ATOM | 296 | C    | CYS | 22 | -0.812 | -6.250  | 16.234 | 1.00 | 0.00 | C |
| ATOM | 297 | O    | CYS | 22 | 0.311  | -6.255  | 16.752 | 1.00 | 0.00 | O |
| ATOM | 298 | CB   | CYS | 22 | -0.806 | -4.625  | 14.270 | 1.00 | 0.00 | C |
| ATOM | 299 | SG   | CYS | 22 | -1.025 | -6.075  | 13.203 | 1.00 | 0.00 | S |
| ATOM | 300 | H    | CYS | 22 | -0.167 | -3.678  | 16.865 | 1.00 | 0.00 | H |
| ATOM | 301 | HA   | CYS | 22 | -2.450 | -5.080  | 15.549 | 1.00 | 0.00 | H |
| ATOM | 302 | HB2  | CYS | 22 | -1.340 | -3.775  | 13.845 | 1.00 | 0.00 | H |
| ATOM | 303 | HB3  | CYS | 22 | 0.254  | -4.394  | 14.348 | 1.00 | 0.00 | H |
| ATOM | 304 | HG   | CYS | 22 | -0.711 | -5.507  | 12.033 | 1.00 | 0.00 | H |
| ATOM | 305 | N    | VAL | 23 | -1.591 | -7.322  | 16.106 | 1.00 | 0.00 | N |
| ATOM | 306 | CA   | VAL | 23 | -1.212 | -8.697  | 16.453 | 1.00 | 0.00 | C |
| ATOM | 307 | C    | VAL | 23 | -0.939 | -9.473  | 15.159 | 1.00 | 0.00 | C |
| ATOM | 308 | O    | VAL | 23 | -1.696 | -9.363  | 14.190 | 1.00 | 0.00 | O |
| ATOM | 309 | CB   | VAL | 23 | -2.320 | -9.389  | 17.283 | 1.00 | 0.00 | C |
| ATOM | 310 | CG1  | VAL | 23 | -1.948 | -10.832 | 17.660 | 1.00 | 0.00 | C |
| ATOM | 311 | CG2  | VAL | 23 | -2.631 | -8.605  | 18.572 | 1.00 | 0.00 | C |
| ATOM | 312 | H    | VAL | 23 | -2.463 | -7.190  | 15.588 | 1.00 | 0.00 | H |
| ATOM | 313 | HA   | VAL | 23 | -0.302 | -8.673  | 17.052 | 1.00 | 0.00 | H |
| ATOM | 314 | HB   | VAL | 23 | -3.231 | -9.415  | 16.682 | 1.00 | 0.00 | H |
| ATOM | 315 | HG11 | VAL | 23 | -1.004 | -10.849 | 18.207 | 1.00 | 0.00 | H |
| ATOM | 316 | HG12 | VAL | 23 | -2.730 | -11.263 | 18.286 | 1.00 | 0.00 | H |
| ATOM | 317 | HG13 | VAL | 23 | -1.859 | -11.447 | 16.764 | 1.00 | 0.00 | H |
| ATOM | 318 | HG21 | VAL | 23 | -2.989 | -7.604  | 18.335 | 1.00 | 0.00 | H |
| ATOM | 319 | HG22 | VAL | 23 | -3.409 | -9.116  | 19.139 | 1.00 | 0.00 | H |
| ATOM | 320 | HG23 | VAL | 23 | -1.735 | -8.525  | 19.189 | 1.00 | 0.00 | H |
| ATOM | 321 | N    | ALA | 24 | 0.141  | -10.254 | 15.154 | 1.00 | 0.00 | N |
| ATOM | 322 | CA   | ALA | 24 | 0.627  | -11.031 | 14.016 | 1.00 | 0.00 | C |
| ATOM | 323 | C    | ALA | 24 | 0.461  | -12.544 | 14.240 | 1.00 | 0.00 | C |
| ATOM | 324 | O    | ALA | 24 | 0.878  | -13.068 | 15.272 | 1.00 | 0.00 | O |
| ATOM | 325 | CB   | ALA | 24 | 2.100  | -10.654 | 13.843 | 1.00 | 0.00 | C |
| ATOM | 326 | H    | ALA | 24 | 0.703  | -10.309 | 16.003 | 1.00 | 0.00 | H |
| ATOM | 327 | HA   | ALA | 24 | 0.075  | -10.767 | 13.114 | 1.00 | 0.00 | H |
| ATOM | 328 | HB1  | ALA | 24 | 2.572  | -10.567 | 14.822 | 1.00 | 0.00 | H |
| ATOM | 329 | HB2  | ALA | 24 | 2.618  | -11.443 | 13.312 | 1.00 | 0.00 | H |
| ATOM | 330 | HB3  | ALA | 24 | 2.184  | -9.707  | 13.311 | 1.00 | 0.00 | H |
| ATOM | 331 | N    | SER | 25 | -0.116 | -13.260 | 13.265 | 1.00 | 0.00 | N |
| ATOM | 332 | CA   | SER | 25 | -0.419 | -14.695 | 13.399 | 1.00 | 0.00 | C |
| ATOM | 333 | C    | SER | 25 | 0.076  | -15.561 | 12.221 | 1.00 | 0.00 | C |
| ATOM | 334 | O    | SER | 25 | 0.259  | -15.065 | 11.112 | 1.00 | 0.00 | O |
| ATOM | 335 | CB   | SER | 25 | -1.929 | -14.881 | 13.638 | 1.00 | 0.00 | C |
| ATOM | 336 | OG   | SER | 25 | -2.695 | -14.728 | 12.461 | 1.00 | 0.00 | O |
| ATOM | 337 | H    | SER | 25 | -0.411 | -12.813 | 12.402 | 1.00 | 0.00 | H |
| ATOM | 338 | HA   | SER | 25 | 0.086  | -15.071 | 14.289 | 1.00 | 0.00 | H |

|      |     |      |     |    |        |         |        |      |      |   |
|------|-----|------|-----|----|--------|---------|--------|------|------|---|
| ATOM | 339 | HB2  | SER | 25 | -2.100 | -15.884 | 14.031 | 1.00 | 0.00 | H |
| ATOM | 340 | HB3  | SER | 25 | -2.268 | -14.162 | 14.386 | 1.00 | 0.00 | H |
| ATOM | 341 | HG   | SER | 25 | -2.463 | -13.897 | 11.998 | 1.00 | 0.00 | H |
| ATOM | 342 | N    | GLU | 26 | 0.315  | -16.855 | 12.497 | 1.00 | 0.00 | N |
| ATOM | 343 | CA   | GLU | 26 | 0.822  | -17.930 | 11.621 | 1.00 | 0.00 | C |
| ATOM | 344 | C    | GLU | 26 | 2.357  | -17.943 | 11.558 | 1.00 | 0.00 | C |
| ATOM | 345 | O    | GLU | 26 | 2.968  | -18.973 | 11.831 | 1.00 | 0.00 | O |
| ATOM | 346 | CB   | GLU | 26 | 0.216  | -17.918 | 10.201 | 1.00 | 0.00 | C |
| ATOM | 347 | CG   | GLU | 26 | 0.506  | -19.224 | 9.428  | 1.00 | 0.00 | C |
| ATOM | 348 | CD   | GLU | 26 | -0.762 | -19.883 | 8.893  | 1.00 | 0.00 | C |
| ATOM | 349 | OE1  | GLU | 26 | -0.960 | -19.966 | 7.660  | 1.00 | 0.00 | O |
| ATOM | 350 | OE2  | GLU | 26 | -1.642 | -20.286 | 9.682  | 1.00 | 0.00 | O |
| ATOM | 351 | H    | GLU | 26 | 0.128  | -17.155 | 13.440 | 1.00 | 0.00 | H |
| ATOM | 352 | HA   | GLU | 26 | 0.518  | -18.872 | 12.081 | 1.00 | 0.00 | H |
| ATOM | 353 | HB2  | GLU | 26 | -0.861 | -17.764 | 10.277 | 1.00 | 0.00 | H |
| ATOM | 354 | HB3  | GLU | 26 | 0.642  | -17.090 | 9.637  | 1.00 | 0.00 | H |
| ATOM | 355 | HG2  | GLU | 26 | 1.172  | -18.998 | 8.593  | 1.00 | 0.00 | H |
| ATOM | 356 | HG3  | GLU | 26 | 1.017  | -19.943 | 10.067 | 1.00 | 0.00 | H |
| ATOM | 357 | N    | PHE | 27 | 2.987  | -16.823 | 11.198 | 1.00 | 0.00 | N |
| ATOM | 358 | CA   | PHE | 27 | 4.421  | -16.774 | 10.907 | 1.00 | 0.00 | C |
| ATOM | 359 | C    | PHE | 27 | 5.310  | -16.553 | 12.143 | 1.00 | 0.00 | C |
| ATOM | 360 | O    | PHE | 27 | 4.913  | -15.937 | 13.136 | 1.00 | 0.00 | O |
| ATOM | 361 | CB   | PHE | 27 | 4.699  | -15.695 | 9.848  | 1.00 | 0.00 | C |
| ATOM | 362 | CG   | PHE | 27 | 4.685  | -14.267 | 10.370 | 1.00 | 0.00 | C |
| ATOM | 363 | CD1  | PHE | 27 | 5.884  | -13.541 | 10.513 | 1.00 | 0.00 | C |
| ATOM | 364 | CD2  | PHE | 27 | 3.462  | -13.647 | 10.671 | 1.00 | 0.00 | C |
| ATOM | 365 | CE1  | PHE | 27 | 5.850  | -12.196 | 10.930 | 1.00 | 0.00 | C |
| ATOM | 366 | CE2  | PHE | 27 | 3.428  | -12.294 | 11.040 | 1.00 | 0.00 | C |
| ATOM | 367 | CZ   | PHE | 27 | 4.622  | -11.568 | 11.184 | 1.00 | 0.00 | C |
| ATOM | 368 | H    | PHE | 27 | 2.430  | -15.997 | 11.022 | 1.00 | 0.00 | H |
| ATOM | 369 | HA   | PHE | 27 | 4.694  | -17.738 | 10.476 | 1.00 | 0.00 | H |
| ATOM | 370 | HB2  | PHE | 27 | 5.678  | -15.892 | 9.408  | 1.00 | 0.00 | H |
| ATOM | 371 | HB3  | PHE | 27 | 3.963  | -15.784 | 9.045  | 1.00 | 0.00 | H |
| ATOM | 372 | HD1  | PHE | 27 | 6.833  | -14.006 | 10.290 | 1.00 | 0.00 | H |
| ATOM | 373 | HD2  | PHE | 27 | 2.534  | -14.185 | 10.554 | 1.00 | 0.00 | H |
| ATOM | 374 | HE1  | PHE | 27 | 6.772  | -11.641 | 11.040 | 1.00 | 0.00 | H |
| ATOM | 375 | HE2  | PHE | 27 | 2.469  | -11.819 | 11.188 | 1.00 | 0.00 | H |
| ATOM | 376 | HZ   | PHE | 27 | 4.594  | -10.529 | 11.477 | 1.00 | 0.00 | H |
| ATOM | 377 | N    | THR | 28 | 6.576  | -16.965 | 12.017 | 1.00 | 0.00 | N |
| ATOM | 378 | CA   | THR | 28 | 7.651  | -16.654 | 12.968 | 1.00 | 0.00 | C |
| ATOM | 379 | C    | THR | 28 | 7.936  | -15.151 | 12.965 | 1.00 | 0.00 | C |
| ATOM | 380 | O    | THR | 28 | 8.640  | -14.638 | 12.096 | 1.00 | 0.00 | O |
| ATOM | 381 | CB   | THR | 28 | 8.906  | -17.472 | 12.634 | 1.00 | 0.00 | C |
| ATOM | 382 | CG2  | THR | 28 | 9.943  | -17.369 | 13.746 | 1.00 | 0.00 | C |
| ATOM | 383 | OG1  | THR | 28 | 8.545  | -18.828 | 12.510 | 1.00 | 0.00 | O |
| ATOM | 384 | H    | THR | 28 | 6.815  | -17.538 | 11.223 | 1.00 | 0.00 | H |
| ATOM | 385 | HA   | THR | 28 | 7.321  | -16.941 | 13.966 | 1.00 | 0.00 | H |
| ATOM | 386 | HB   | THR | 28 | 9.338  | -17.126 | 11.693 | 1.00 | 0.00 | H |
| ATOM | 387 | HG1  | THR | 28 | 9.347  | -19.349 | 12.412 | 1.00 | 0.00 | H |
| ATOM | 388 | HG21 | THR | 28 | 9.515  | -17.710 | 14.688 | 1.00 | 0.00 | H |
| ATOM | 389 | HG22 | THR | 28 | 10.810 | -17.981 | 13.501 | 1.00 | 0.00 | H |
| ATOM | 390 | HG23 | THR | 28 | 10.273 | -16.337 | 13.845 | 1.00 | 0.00 | H |
| ATOM | 391 | N    | PHE | 29 | 7.379  | -14.454 | 13.955 | 1.00 | 0.00 | N |
| ATOM | 392 | CA   | PHE | 29 | 7.409  | -12.998 | 14.090 | 1.00 | 0.00 | C |
| ATOM | 393 | C    | PHE | 29 | 8.825  | -12.406 | 14.180 | 1.00 | 0.00 | C |
| ATOM | 394 | O    | PHE | 29 | 9.091  | -11.326 | 13.660 | 1.00 | 0.00 | O |
| ATOM | 395 | CB   | PHE | 29 | 6.591  | -12.657 | 15.335 | 1.00 | 0.00 | C |



|      |     |      |     |    |        |         |        |      |      |   |
|------|-----|------|-----|----|--------|---------|--------|------|------|---|
| ATOM | 396 | CG   | PHE | 29 | 6.487  | -11.184 | 15.658 | 1.00 | 0.00 | C |
| ATOM | 397 | CD1  | PHE | 29 | 5.473  | -10.410 | 15.072 | 1.00 | 0.00 | C |
| ATOM | 398 | CD2  | PHE | 29 | 7.351  | -10.604 | 16.607 | 1.00 | 0.00 | C |
| ATOM | 399 | CE1  | PHE | 29 | 5.280  | -9.080  | 15.476 | 1.00 | 0.00 | C |
| ATOM | 400 | CE2  | PHE | 29 | 7.164  | -9.270  | 17.007 | 1.00 | 0.00 | C |
| ATOM | 401 | CZ   | PHE | 29 | 6.118  | -8.515  | 16.455 | 1.00 | 0.00 | C |
| ATOM | 402 | H    | PHE | 29 | 6.741  | -14.957 | 14.555 | 1.00 | 0.00 | H |
| ATOM | 403 | HA   | PHE | 29 | 6.922  | -12.556 | 13.224 | 1.00 | 0.00 | H |
| ATOM | 404 | HB2  | PHE | 29 | 5.579  | -13.047 | 15.196 | 1.00 | 0.00 | H |
| ATOM | 405 | HB3  | PHE | 29 | 7.019  | -13.172 | 16.198 | 1.00 | 0.00 | H |
| ATOM | 406 | HD1  | PHE | 29 | 4.819  | -10.851 | 14.335 | 1.00 | 0.00 | H |
| ATOM | 407 | HD2  | PHE | 29 | 8.137  | -11.196 | 17.050 | 1.00 | 0.00 | H |
| ATOM | 408 | HE1  | PHE | 29 | 4.468  | -8.507  | 15.053 | 1.00 | 0.00 | H |
| ATOM | 409 | HE2  | PHE | 29 | 7.801  | -8.837  | 17.765 | 1.00 | 0.00 | H |
| ATOM | 410 | HZ   | PHE | 29 | 5.951  | -7.506  | 16.797 | 1.00 | 0.00 | H |
| ATOM | 411 | N    | ASN | 30 | 9.752  | -13.134 | 14.803 | 1.00 | 0.00 | N |
| ATOM | 412 | CA   | ASN | 30 | 11.155 | -12.742 | 14.986 | 1.00 | 0.00 | C |
| ATOM | 413 | C    | ASN | 30 | 12.033 | -12.832 | 13.710 | 1.00 | 0.00 | C |
| ATOM | 414 | O    | ASN | 30 | 13.255 | -12.739 | 13.807 | 1.00 | 0.00 | O |
| ATOM | 415 | CB   | ASN | 30 | 11.723 | -13.499 | 16.200 | 1.00 | 0.00 | C |
| ATOM | 416 | CG   | ASN | 30 | 11.528 | -15.007 | 16.121 | 1.00 | 0.00 | C |
| ATOM | 417 | ND2  | ASN | 30 | 10.474 | -15.529 | 16.727 | 1.00 | 0.00 | N |
| ATOM | 418 | OD1  | ASN | 30 | 12.291 | -15.717 | 15.493 | 1.00 | 0.00 | O |
| ATOM | 419 | H    | ASN | 30 | 9.465  | -14.025 | 15.179 | 1.00 | 0.00 | H |
| ATOM | 420 | HA   | ASN | 30 | 11.159 | -11.684 | 15.245 | 1.00 | 0.00 | H |
| ATOM | 421 | HB2  | ASN | 30 | 12.785 | -13.281 | 16.312 | 1.00 | 0.00 | H |
| ATOM | 422 | HB3  | ASN | 30 | 11.228 | -13.135 | 17.101 | 1.00 | 0.00 | H |
| ATOM | 423 | HD21 | ASN | 30 | 10.376 | -16.529 | 16.678 | 1.00 | 0.00 | H |
| ATOM | 424 | HD22 | ASN | 30 | 9.867  | -14.958 | 17.295 | 1.00 | 0.00 | H |
| ATOM | 425 | N    | ASN | 31 | 11.414 | -12.978 | 12.529 | 1.00 | 0.00 | N |
| ATOM | 426 | CA   | ASN | 31 | 12.055 | -13.026 | 11.206 | 1.00 | 0.00 | C |
| ATOM | 427 | C    | ASN | 31 | 12.008 | -11.666 | 10.459 | 1.00 | 0.00 | C |
| ATOM | 428 | O    | ASN | 31 | 13.028 | -11.147 | 10.015 | 1.00 | 0.00 | O |
| ATOM | 429 | CB   | ASN | 31 | 11.333 | -14.135 | 10.413 | 1.00 | 0.00 | C |
| ATOM | 430 | CG   | ASN | 31 | 12.012 | -14.560 | 9.114  | 1.00 | 0.00 | C |
| ATOM | 431 | ND2  | ASN | 31 | 11.478 | -15.568 | 8.450  | 1.00 | 0.00 | N |
| ATOM | 432 | OD1  | ASN | 31 | 13.019 | -14.027 | 8.686  | 1.00 | 0.00 | O |
| ATOM | 433 | H    | ASN | 31 | 10.410 | -13.070 | 12.554 | 1.00 | 0.00 | H |
| ATOM | 434 | HA   | ASN | 31 | 13.103 | -13.314 | 11.323 | 1.00 | 0.00 | H |
| ATOM | 435 | HB2  | ASN | 31 | 11.270 | -15.024 | 11.039 | 1.00 | 0.00 | H |
| ATOM | 436 | HB3  | ASN | 31 | 10.315 | -13.814 | 10.183 | 1.00 | 0.00 | H |
| ATOM | 437 | HD21 | ASN | 31 | 11.920 | -15.835 | 7.585  | 1.00 | 0.00 | H |
| ATOM | 438 | HD22 | ASN | 31 | 10.638 | -16.006 | 8.778  | 1.00 | 0.00 | H |
| ATOM | 439 | N    | TYR | 32 | 10.828 | -11.044 | 10.331 | 1.00 | 0.00 | N |
| ATOM | 440 | CA   | TYR | 32 | 10.628 | -9.902  | 9.422  | 1.00 | 0.00 | C |
| ATOM | 441 | C    | TYR | 32 | 10.734 | -8.524  | 10.097 | 1.00 | 0.00 | C |
| ATOM | 442 | O    | TYR | 32 | 10.326 | -8.342  | 11.247 | 1.00 | 0.00 | O |
| ATOM | 443 | CB   | TYR | 32 | 9.271  | -10.062 | 8.722  | 1.00 | 0.00 | C |
| ATOM | 444 | CG   | TYR | 32 | 9.089  | -11.379 | 7.980  | 1.00 | 0.00 | C |
| ATOM | 445 | CD1  | TYR | 32 | 7.847  | -12.041 | 8.045  | 1.00 | 0.00 | C |
| ATOM | 446 | CD2  | TYR | 32 | 10.153 | -11.966 | 7.264  | 1.00 | 0.00 | C |
| ATOM | 447 | CE1  | TYR | 32 | 7.680  | -13.302 | 7.445  | 1.00 | 0.00 | C |
| ATOM | 448 | CE2  | TYR | 32 | 9.994  | -13.227 | 6.665  | 1.00 | 0.00 | C |
| ATOM | 449 | CZ   | TYR | 32 | 8.763  | -13.908 | 6.768  | 1.00 | 0.00 | C |
| ATOM | 450 | OH   | TYR | 32 | 8.621  | -15.139 | 6.207  | 1.00 | 0.00 | O |
| ATOM | 451 | H    | TYR | 32 | 10.014 | -11.463 | 10.750 | 1.00 | 0.00 | H |
| ATOM | 452 | HA   | TYR | 32 | 11.399 | -9.925  | 8.650  | 1.00 | 0.00 | H |

|      |     |     |     |    |        |         |        |      |      |   |
|------|-----|-----|-----|----|--------|---------|--------|------|------|---|
| ATOM | 453 | HB2 | TYR | 32 | 8.490  | -9.976  | 9.479  | 1.00 | 0.00 | H |
| ATOM | 454 | HB3 | TYR | 32 | 9.129  | -9.243  | 8.018  | 1.00 | 0.00 | H |
| ATOM | 455 | HD1 | TYR | 32 | 7.020  | -11.580 | 8.564  | 1.00 | 0.00 | H |
| ATOM | 456 | HD2 | TYR | 32 | 11.105 | -11.462 | 7.172  | 1.00 | 0.00 | H |
| ATOM | 457 | HE1 | TYR | 32 | 6.725  | -13.801 | 7.509  | 1.00 | 0.00 | H |
| ATOM | 458 | HE2 | TYR | 32 | 10.818 | -13.679 | 6.131  | 1.00 | 0.00 | H |
| ATOM | 459 | HH  | TYR | 32 | 7.718  | -15.452 | 6.266  | 1.00 | 0.00 | H |
| ATOM | 460 | N   | TRP | 33 | 11.219 | -7.521  | 9.348  | 1.00 | 0.00 | N |
| ATOM | 461 | CA  | TRP | 33 | 11.149 | -6.104  | 9.740  | 1.00 | 0.00 | C |
| ATOM | 462 | C   | TRP | 33 | 9.687  | -5.639  | 9.626  | 1.00 | 0.00 | C |
| ATOM | 463 | O   | TRP | 33 | 9.035  | -5.918  | 8.622  | 1.00 | 0.00 | O |
| ATOM | 464 | CB  | TRP | 33 | 12.098 | -5.245  | 8.874  | 1.00 | 0.00 | C |
| ATOM | 465 | CG  | TRP | 33 | 13.573 | -5.551  | 8.930  | 1.00 | 0.00 | C |
| ATOM | 466 | CD1 | TRP | 33 | 14.155 | -6.484  | 9.712  | 1.00 | 0.00 | C |
| ATOM | 467 | CD2 | TRP | 33 | 14.676 | -4.949  | 8.172  | 1.00 | 0.00 | C |
| ATOM | 468 | CE2 | TRP | 33 | 15.894 | -5.597  | 8.542  | 1.00 | 0.00 | C |
| ATOM | 469 | CE3 | TRP | 33 | 14.779 | -3.921  | 7.210  | 1.00 | 0.00 | C |
| ATOM | 470 | NE1 | TRP | 33 | 15.516 | -6.519  | 9.490  | 1.00 | 0.00 | N |
| ATOM | 471 | CZ2 | TRP | 33 | 17.135 | -5.264  | 7.980  | 1.00 | 0.00 | C |
| ATOM | 472 | CZ3 | TRP | 33 | 16.014 | -3.594  | 6.619  | 1.00 | 0.00 | C |
| ATOM | 473 | CH2 | TRP | 33 | 17.191 | -4.262  | 6.996  | 1.00 | 0.00 | C |
| ATOM | 474 | H   | TRP | 33 | 11.505 | -7.733  | 8.404  | 1.00 | 0.00 | H |
| ATOM | 475 | HA  | TRP | 33 | 11.455 | -6.001  | 10.782 | 1.00 | 0.00 | H |
| ATOM | 476 | HB2 | TRP | 33 | 11.781 | -5.314  | 7.832  | 1.00 | 0.00 | H |
| ATOM | 477 | HB3 | TRP | 33 | 11.976 | -4.201  | 9.174  | 1.00 | 0.00 | H |
| ATOM | 478 | HD1 | TRP | 33 | 13.613 | -7.124  | 10.387 | 1.00 | 0.00 | H |
| ATOM | 479 | HE1 | TRP | 33 | 16.157 | -7.135  | 9.980  | 1.00 | 0.00 | H |
| ATOM | 480 | HE3 | TRP | 33 | 13.896 | -3.371  | 6.926  | 1.00 | 0.00 | H |
| ATOM | 481 | HZ2 | TRP | 33 | 18.029 | -5.790  | 8.287  | 1.00 | 0.00 | H |
| ATOM | 482 | HZ3 | TRP | 33 | 16.055 | -2.815  | 5.870  | 1.00 | 0.00 | H |
| ATOM | 483 | HH2 | TRP | 33 | 18.134 | -4.012  | 6.530  | 1.00 | 0.00 | H |
| ATOM | 484 | N   | MET | 34 | 9.154  | -4.969  | 10.647 | 1.00 | 0.00 | N |
| ATOM | 485 | CA  | MET | 34 | 7.726  | -4.622  | 10.726 | 1.00 | 0.00 | C |
| ATOM | 486 | C   | MET | 34 | 7.517  | -3.133  | 10.475 | 1.00 | 0.00 | C |
| ATOM | 487 | O   | MET | 34 | 8.295  | -2.322  | 10.972 | 1.00 | 0.00 | O |
| ATOM | 488 | CB  | MET | 34 | 7.182  | -5.022  | 12.105 | 1.00 | 0.00 | C |
| ATOM | 489 | CG  | MET | 34 | 6.185  | -6.179  | 11.995 | 1.00 | 0.00 | C |
| ATOM | 490 | SD  | MET | 34 | 4.541  | -5.661  | 11.436 | 1.00 | 0.00 | S |
| ATOM | 491 | CE  | MET | 34 | 3.567  | -6.972  | 12.221 | 1.00 | 0.00 | C |
| ATOM | 492 | H   | MET | 34 | 9.782  | -4.590  | 11.354 | 1.00 | 0.00 | H |
| ATOM | 493 | HA  | MET | 34 | 7.163  | -5.154  | 9.958  | 1.00 | 0.00 | H |
| ATOM | 494 | HB2 | MET | 34 | 8.000  | -5.322  | 12.760 | 1.00 | 0.00 | H |
| ATOM | 495 | HB3 | MET | 34 | 6.683  | -4.169  | 12.573 | 1.00 | 0.00 | H |
| ATOM | 496 | HG2 | MET | 34 | 6.567  | -6.945  | 11.318 | 1.00 | 0.00 | H |
| ATOM | 497 | HG3 | MET | 34 | 6.089  | -6.643  | 12.974 | 1.00 | 0.00 | H |
| ATOM | 498 | HE1 | MET | 34 | 3.638  | -6.878  | 13.301 | 1.00 | 0.00 | H |
| ATOM | 499 | HE2 | MET | 34 | 2.523  | -6.887  | 11.925 | 1.00 | 0.00 | H |
| ATOM | 500 | HE3 | MET | 34 | 3.948  | -7.949  | 11.925 | 1.00 | 0.00 | H |
| ATOM | 501 | N   | ASN | 35 | 6.465  | -2.753  | 9.746  | 1.00 | 0.00 | N |
| ATOM | 502 | CA  | ASN | 35 | 6.188  | -1.343  | 9.473  | 1.00 | 0.00 | C |
| ATOM | 503 | C   | ASN | 35 | 4.701  | -1.036  | 9.219  | 1.00 | 0.00 | C |
| ATOM | 504 | O   | ASN | 35 | 3.858  | -1.915  | 9.020  | 1.00 | 0.00 | O |
| ATOM | 505 | CB  | ASN | 35 | 7.120  | -0.803  | 8.370  | 1.00 | 0.00 | C |
| ATOM | 506 | CG  | ASN | 35 | 6.752  | -1.275  | 6.976  | 1.00 | 0.00 | C |
| ATOM | 507 | ND2 | ASN | 35 | 7.308  | -2.387  | 6.535  | 1.00 | 0.00 | N |
| ATOM | 508 | OD1 | ASN | 35 | 5.991  | -0.613  | 6.286  | 1.00 | 0.00 | O |
| ATOM | 509 | H   | ASN | 35 | 5.837  | -3.450  | 9.342  | 1.00 | 0.00 | H |

|      |     |      |     |    |        |        |        |      |      |   |
|------|-----|------|-----|----|--------|--------|--------|------|------|---|
| ATOM | 510 | HA   | ASN | 35 | 6.447  | -0.793 | 10.377 | 1.00 | 0.00 | H |
| ATOM | 511 | HB2  | ASN | 35 | 7.071  | 0.284  | 8.368  | 1.00 | 0.00 | H |
| ATOM | 512 | HB3  | ASN | 35 | 8.150  | -1.090 | 8.578  | 1.00 | 0.00 | H |
| ATOM | 513 | HD21 | ASN | 35 | 7.101  | -2.684 | 5.590  | 1.00 | 0.00 | H |
| ATOM | 514 | HD22 | ASN | 35 | 7.987  | -2.881 | 7.085  | 1.00 | 0.00 | H |
| ATOM | 515 | N    | TRP | 36 | 4.397  | 0.261  | 9.314  | 1.00 | 0.00 | N |
| ATOM | 516 | CA   | TRP | 36 | 3.061  | 0.826  | 9.162  | 1.00 | 0.00 | C |
| ATOM | 517 | C    | TRP | 36 | 3.029  | 1.856  | 8.025  | 1.00 | 0.00 | C |
| ATOM | 518 | O    | TRP | 36 | 3.876  | 2.755  | 7.969  | 1.00 | 0.00 | O |
| ATOM | 519 | CB   | TRP | 36 | 2.645  | 1.483  | 10.485 | 1.00 | 0.00 | C |
| ATOM | 520 | CG   | TRP | 36 | 2.278  | 0.552  | 11.606 | 1.00 | 0.00 | C |
| ATOM | 521 | CD1  | TRP | 36 | 3.143  | -0.032 | 12.466 | 1.00 | 0.00 | C |
| ATOM | 522 | CD2  | TRP | 36 | 0.945  | 0.134  | 12.039 | 1.00 | 0.00 | C |
| ATOM | 523 | CE2  | TRP | 36 | 1.080  | -0.673 | 13.208 | 1.00 | 0.00 | C |
| ATOM | 524 | CE3  | TRP | 36 | -0.367 | 0.374  | 11.576 | 1.00 | 0.00 | C |
| ATOM | 525 | NE1  | TRP | 36 | 2.442  | -0.759 | 13.412 | 1.00 | 0.00 | N |
| ATOM | 526 | CZ2  | TRP | 36 | -0.026 | -1.188 | 13.898 | 1.00 | 0.00 | C |
| ATOM | 527 | CZ3  | TRP | 36 | -1.485 | -0.146 | 12.257 | 1.00 | 0.00 | C |
| ATOM | 528 | CH2  | TRP | 36 | -1.319 | -0.920 | 13.418 | 1.00 | 0.00 | C |
| ATOM | 529 | H    | TRP | 36 | 5.155  | 0.904  | 9.507  | 1.00 | 0.00 | H |
| ATOM | 530 | HA   | TRP | 36 | 2.351  | 0.032  | 8.932  | 1.00 | 0.00 | H |
| ATOM | 531 | HB2  | TRP | 36 | 3.444  | 2.144  | 10.822 | 1.00 | 0.00 | H |
| ATOM | 532 | HB3  | TRP | 36 | 1.773  | 2.111  | 10.289 | 1.00 | 0.00 | H |
| ATOM | 533 | HD1  | TRP | 36 | 4.220  | 0.080  | 12.432 | 1.00 | 0.00 | H |
| ATOM | 534 | HE1  | TRP | 36 | 2.884  | -1.272 | 14.163 | 1.00 | 0.00 | H |
| ATOM | 535 | HE3  | TRP | 36 | -0.511 | 0.965  | 10.685 | 1.00 | 0.00 | H |
| ATOM | 536 | HZ2  | TRP | 36 | 0.117  | -1.780 | 14.788 | 1.00 | 0.00 | H |
| ATOM | 537 | HZ3  | TRP | 36 | -2.481 | 0.054  | 11.885 | 1.00 | 0.00 | H |
| ATOM | 538 | HH2  | TRP | 36 | -2.184 | -1.309 | 13.938 | 1.00 | 0.00 | H |
| ATOM | 539 | N    | VAL | 37 | 2.015  | 1.765  | 7.161  | 1.00 | 0.00 | N |
| ATOM | 540 | CA   | VAL | 37 | 1.844  | 2.671  | 6.015  | 1.00 | 0.00 | C |
| ATOM | 541 | C    | VAL | 37 | 0.401  | 3.175  | 6.056  | 1.00 | 0.00 | C |
| ATOM | 542 | O    | VAL | 37 | -0.511 | 2.370  | 6.232  | 1.00 | 0.00 | O |
| ATOM | 543 | CB   | VAL | 37 | 2.162  | 1.940  | 4.690  | 1.00 | 0.00 | C |
| ATOM | 544 | CG1  | VAL | 37 | 2.056  | 2.853  | 3.459  | 1.00 | 0.00 | C |
| ATOM | 545 | CG2  | VAL | 37 | 3.559  | 1.288  | 4.724  | 1.00 | 0.00 | C |
| ATOM | 546 | H    | VAL | 37 | 1.329  | 1.016  | 7.269  | 1.00 | 0.00 | H |
| ATOM | 547 | HA   | VAL | 37 | 2.518  | 3.523  | 6.116  | 1.00 | 0.00 | H |
| ATOM | 548 | HB   | VAL | 37 | 1.429  | 1.151  | 4.578  | 1.00 | 0.00 | H |
| ATOM | 549 | HG11 | VAL | 37 | 2.864  | 3.580  | 3.458  | 1.00 | 0.00 | H |
| ATOM | 550 | HG12 | VAL | 37 | 2.125  | 2.256  | 2.550  | 1.00 | 0.00 | H |
| ATOM | 551 | HG13 | VAL | 37 | 1.100  | 3.377  | 3.455  | 1.00 | 0.00 | H |
| ATOM | 552 | HG21 | VAL | 37 | 3.585  | 0.487  | 5.461  | 1.00 | 0.00 | H |
| ATOM | 553 | HG22 | VAL | 37 | 3.795  | 0.854  | 3.755  | 1.00 | 0.00 | H |
| ATOM | 554 | HG23 | VAL | 37 | 4.318  | 2.026  | 4.969  | 1.00 | 0.00 | H |
| ATOM | 555 | N    | ARG | 38 | 0.193  | 4.492  | 5.961  | 1.00 | 0.00 | N |
| ATOM | 556 | CA   | ARG | 38 | -1.116 | 5.136  | 6.110  | 1.00 | 0.00 | C |
| ATOM | 557 | C    | ARG | 38 | -1.632 | 5.714  | 4.792  | 1.00 | 0.00 | C |
| ATOM | 558 | O    | ARG | 38 | -0.860 | 6.217  | 3.980  | 1.00 | 0.00 | O |
| ATOM | 559 | CB   | ARG | 38 | -1.080 | 6.188  | 7.232  | 1.00 | 0.00 | C |
| ATOM | 560 | CG   | ARG | 38 | -0.289 | 7.461  | 6.881  | 1.00 | 0.00 | C |
| ATOM | 561 | CD   | ARG | 38 | -0.203 | 8.402  | 8.086  | 1.00 | 0.00 | C |
| ATOM | 562 | NE   | ARG | 38 | 0.516  | 9.640  | 7.754  | 1.00 | 0.00 | N |
| ATOM | 563 | CZ   | ARG | 38 | 0.928  | 10.567 | 8.603  | 1.00 | 0.00 | C |
| ATOM | 564 | NH1  | ARG | 38 | 0.781  | 10.460 | 9.901  | 1.00 | 0.00 | N |
| ATOM | 565 | NH2  | ARG | 38 | 1.470  | 11.659 | 8.128  | 1.00 | 0.00 | N |
| ATOM | 566 | H    | ARG | 38 | 0.991  | 5.094  | 5.762  | 1.00 | 0.00 | H |

|      |     |      |     |    |        |        |        |      |      |   |
|------|-----|------|-----|----|--------|--------|--------|------|------|---|
| ATOM | 567 | HA   | ARG | 38 | -1.817 | 4.371  | 6.424  | 1.00 | 0.00 | H |
| ATOM | 568 | HB2  | ARG | 38 | -2.104 | 6.471  | 7.479  | 1.00 | 0.00 | H |
| ATOM | 569 | HB3  | ARG | 38 | -0.641 | 5.729  | 8.118  | 1.00 | 0.00 | H |
| ATOM | 570 | HG2  | ARG | 38 | 0.717  | 7.191  | 6.570  | 1.00 | 0.00 | H |
| ATOM | 571 | HG3  | ARG | 38 | -0.786 | 7.986  | 6.064  | 1.00 | 0.00 | H |
| ATOM | 572 | HD2  | ARG | 38 | -1.213 | 8.654  | 8.419  | 1.00 | 0.00 | H |
| ATOM | 573 | HD3  | ARG | 38 | 0.321  | 7.894  | 8.894  | 1.00 | 0.00 | H |
| ATOM | 574 | HE   | ARG | 38 | 0.639  | 9.888  | 6.770  | 1.00 | 0.00 | H |
| ATOM | 575 | HH11 | ARG | 38 | 0.259  | 9.700  | 10.306 | 1.00 | 0.00 | H |
| ATOM | 576 | HH12 | ARG | 38 | 1.059  | 11.263 | 10.461 | 1.00 | 0.00 | H |
| ATOM | 577 | HH21 | ARG | 38 | 1.524  | 11.712 | 7.109  | 1.00 | 0.00 | H |
| ATOM | 578 | HH22 | ARG | 38 | 1.533  | 12.475 | 8.717  | 1.00 | 0.00 | H |
| ATOM | 579 | N    | GLN | 39 | -2.944 | 5.659  | 4.588  | 1.00 | 0.00 | N |
| ATOM | 580 | CA   | GLN | 39 | -3.629 | 6.257  | 3.448  | 1.00 | 0.00 | C |
| ATOM | 581 | C    | GLN | 39 | -4.428 | 7.478  | 3.908  | 1.00 | 0.00 | C |
| ATOM | 582 | O    | GLN | 39 | -5.453 | 7.321  | 4.573  | 1.00 | 0.00 | O |
| ATOM | 583 | CB   | GLN | 39 | -4.543 | 5.210  | 2.789  | 1.00 | 0.00 | C |
| ATOM | 584 | CG   | GLN | 39 | -5.030 | 5.674  | 1.404  | 1.00 | 0.00 | C |
| ATOM | 585 | CD   | GLN | 39 | -5.970 | 4.664  | 0.749  | 1.00 | 0.00 | C |
| ATOM | 586 | NE2  | GLN | 39 | -5.870 | 4.453  | -0.544 | 1.00 | 0.00 | N |
| ATOM | 587 | OE1  | GLN | 39 | -6.806 | 4.040  | 1.384  | 1.00 | 0.00 | O |
| ATOM | 588 | H    | GLN | 39 | -3.504 | 5.164  | 5.276  | 1.00 | 0.00 | H |
| ATOM | 589 | HA   | GLN | 39 | -2.894 | 6.574  | 2.714  | 1.00 | 0.00 | H |
| ATOM | 590 | HB2  | GLN | 39 | -4.006 | 4.271  | 2.673  | 1.00 | 0.00 | H |
| ATOM | 591 | HB3  | GLN | 39 | -5.402 | 5.016  | 3.432  | 1.00 | 0.00 | H |
| ATOM | 592 | HG2  | GLN | 39 | -5.562 | 6.622  | 1.492  | 1.00 | 0.00 | H |
| ATOM | 593 | HG3  | GLN | 39 | -4.161 | 5.823  | 0.759  | 1.00 | 0.00 | H |
| ATOM | 594 | HE21 | GLN | 39 | -6.499 | 3.779  | -0.937 | 1.00 | 0.00 | H |
| ATOM | 595 | HE22 | GLN | 39 | -5.187 | 4.940  | -1.107 | 1.00 | 0.00 | H |
| ATOM | 596 | N    | SER | 40 | -4.003 | 8.686  | 3.531  | 1.00 | 0.00 | N |
| ATOM | 597 | CA   | SER | 40 | -4.858 | 9.876  | 3.611  | 1.00 | 0.00 | C |
| ATOM | 598 | C    | SER | 40 | -5.308 | 10.282 | 2.191  | 1.00 | 0.00 | C |
| ATOM | 599 | O    | SER | 40 | -4.508 | 10.177 | 1.251  | 1.00 | 0.00 | O |
| ATOM | 600 | CB   | SER | 40 | -4.173 | 11.033 | 4.353  | 1.00 | 0.00 | C |
| ATOM | 601 | OG   | SER | 40 | -3.115 | 11.618 | 3.627  | 1.00 | 0.00 | O |
| ATOM | 602 | H    | SER | 40 | -3.170 | 8.779  | 2.955  | 1.00 | 0.00 | H |
| ATOM | 603 | HA   | SER | 40 | -5.730 | 9.628  | 4.208  | 1.00 | 0.00 | H |
| ATOM | 604 | HB2  | SER | 40 | -4.919 | 11.807 | 4.551  | 1.00 | 0.00 | H |
| ATOM | 605 | HB3  | SER | 40 | -3.795 | 10.671 | 5.310  | 1.00 | 0.00 | H |
| ATOM | 606 | HG   | SER | 40 | -2.858 | 12.426 | 4.092  | 1.00 | 0.00 | H |
| ATOM | 607 | N    | PRO | 41 | -6.569 | 10.725 | 1.993  | 1.00 | 0.00 | N |
| ATOM | 608 | CA   | PRO | 41 | -7.088 | 11.048 | 0.664  | 1.00 | 0.00 | C |
| ATOM | 609 | C    | PRO | 41 | -6.314 | 12.141 | -0.082 | 1.00 | 0.00 | C |
| ATOM | 610 | O    | PRO | 41 | -6.291 | 12.121 | -1.305 | 1.00 | 0.00 | O |
| ATOM | 611 | CB   | PRO | 41 | -8.542 | 11.477 | 0.873  | 1.00 | 0.00 | C |
| ATOM | 612 | CG   | PRO | 41 | -8.944 | 10.755 | 2.154  | 1.00 | 0.00 | C |
| ATOM | 613 | CD   | PRO | 41 | -7.655 | 10.769 | 2.969  | 1.00 | 0.00 | C |
| ATOM | 614 | HA   | PRO | 41 | -7.066 | 10.139 | 0.060  | 1.00 | 0.00 | H |
| ATOM | 615 | HB2  | PRO | 41 | -8.596 | 12.553 | 1.039  | 1.00 | 0.00 | H |
| ATOM | 616 | HB3  | PRO | 41 | -9.171 | 11.188 | 0.030  | 1.00 | 0.00 | H |
| ATOM | 617 | HG2  | PRO | 41 | -9.759 | 11.264 | 2.670  | 1.00 | 0.00 | H |
| ATOM | 618 | HG3  | PRO | 41 | -9.219 | 9.724  | 1.921  | 1.00 | 0.00 | H |
| ATOM | 619 | HD2  | PRO | 41 | -7.591 | 11.693 | 3.546  | 1.00 | 0.00 | H |
| ATOM | 620 | HD3  | PRO | 41 | -7.653 | 9.905  | 3.634  | 1.00 | 0.00 | H |
| ATOM | 621 | N    | GLU | 42 | -5.692 | 13.085 | 0.636  | 1.00 | 0.00 | N |
| ATOM | 622 | CA   | GLU | 42 | -4.947 | 14.205 | 0.046  | 1.00 | 0.00 | C |
| ATOM | 623 | C    | GLU | 42 | -3.519 | 13.825 | -0.415 | 1.00 | 0.00 | C |

|      |     |      |     |    |        |        |        |      |      |   |
|------|-----|------|-----|----|--------|--------|--------|------|------|---|
| ATOM | 624 | O    | GLU | 42 | -2.876 | 14.608 | -1.110 | 1.00 | 0.00 | O |
| ATOM | 625 | CB   | GLU | 42 | -4.946 | 15.382 | 1.051  | 1.00 | 0.00 | C |
| ATOM | 626 | CG   | GLU | 42 | -3.992 | 15.123 | 2.227  | 1.00 | 0.00 | C |
| ATOM | 627 | CD   | GLU | 42 | -4.053 | 16.097 | 3.400  | 1.00 | 0.00 | C |
| ATOM | 628 | OE1  | GLU | 42 | -4.988 | 16.928 | 3.453  | 1.00 | 0.00 | O |
| ATOM | 629 | OE2  | GLU | 42 | -3.135 | 15.957 | 4.248  | 1.00 | 0.00 | O |
| ATOM | 630 | H    | GLU | 42 | -5.761 | 13.067 | 1.642  | 1.00 | 0.00 | H |
| ATOM | 631 | HA   | GLU | 42 | -5.485 | 14.538 | -0.844 | 1.00 | 0.00 | H |
| ATOM | 632 | HB2  | GLU | 42 | -4.637 | 16.293 | 0.537  | 1.00 | 0.00 | H |
| ATOM | 633 | HB3  | GLU | 42 | -5.963 | 15.525 | 1.419  | 1.00 | 0.00 | H |
| ATOM | 634 | HG2  | GLU | 42 | -4.165 | 14.120 | 2.621  | 1.00 | 0.00 | H |
| ATOM | 635 | HG3  | GLU | 42 | -2.984 | 15.189 | 1.830  | 1.00 | 0.00 | H |
| ATOM | 636 | N    | LYS | 43 | -3.008 | 12.642 | -0.031 | 1.00 | 0.00 | N |
| ATOM | 637 | CA   | LYS | 43 | -1.625 | 12.221 | -0.323 | 1.00 | 0.00 | C |
| ATOM | 638 | C    | LYS | 43 | -1.512 | 10.921 | -1.132 | 1.00 | 0.00 | C |
| ATOM | 639 | O    | LYS | 43 | -0.550 | 10.758 | -1.880 | 1.00 | 0.00 | O |
| ATOM | 640 | CB   | LYS | 43 | -0.849 | 12.019 | 0.992  | 1.00 | 0.00 | C |
| ATOM | 641 | CG   | LYS | 43 | -0.775 | 13.274 | 1.866  | 1.00 | 0.00 | C |
| ATOM | 642 | CD   | LYS | 43 | 0.065  | 13.000 | 3.109  | 1.00 | 0.00 | C |
| ATOM | 643 | CE   | LYS | 43 | 0.132  | 14.235 | 4.006  | 1.00 | 0.00 | C |
| ATOM | 644 | NZ   | LYS | 43 | 0.767  | 13.880 | 5.293  | 1.00 | 0.00 | N |
| ATOM | 645 | H    | LYS | 43 | -3.599 | 12.026 | 0.516  | 1.00 | 0.00 | H |
| ATOM | 646 | HA   | LYS | 43 | -1.118 | 12.990 | -0.906 | 1.00 | 0.00 | H |
| ATOM | 647 | HB2  | LYS | 43 | -1.312 | 11.211 | 1.564  | 1.00 | 0.00 | H |
| ATOM | 648 | HB3  | LYS | 43 | 0.170  | 11.715 | 0.745  | 1.00 | 0.00 | H |
| ATOM | 649 | HG2  | LYS | 43 | -0.347 | 14.105 | 1.299  | 1.00 | 0.00 | H |
| ATOM | 650 | HG3  | LYS | 43 | -1.773 | 13.522 | 2.200  | 1.00 | 0.00 | H |
| ATOM | 651 | HD2  | LYS | 43 | -0.385 | 12.175 | 3.664  | 1.00 | 0.00 | H |
| ATOM | 652 | HD3  | LYS | 43 | 1.074  | 12.719 | 2.804  | 1.00 | 0.00 | H |
| ATOM | 653 | HE2  | LYS | 43 | 0.720  | 15.003 | 3.498  | 1.00 | 0.00 | H |
| ATOM | 654 | HE3  | LYS | 43 | -0.878 | 14.632 | 4.176  | 1.00 | 0.00 | H |
| ATOM | 655 | HZ1  | LYS | 43 | 1.593  | 13.295 | 5.149  | 1.00 | 0.00 | H |
| ATOM | 656 | HZ2  | LYS | 43 | 0.996  | 14.701 | 5.826  | 1.00 | 0.00 | H |
| ATOM | 657 | HZ3  | LYS | 43 | 0.122  | 13.330 | 5.858  | 1.00 | 0.00 | H |
| ATOM | 658 | N    | GLY | 44 | -2.431 | 9.968  | -0.933 | 1.00 | 0.00 | N |
| ATOM | 659 | CA   | GLY | 44 | -2.209 | 8.556  | -1.266 | 1.00 | 0.00 | C |
| ATOM | 660 | C    | GLY | 44 | -1.609 | 7.821  | -0.066 | 1.00 | 0.00 | C |
| ATOM | 661 | O    | GLY | 44 | -2.116 | 7.972  | 1.047  | 1.00 | 0.00 | O |
| ATOM | 662 | H    | GLY | 44 | -3.190 | 10.180 | -0.293 | 1.00 | 0.00 | H |
| ATOM | 663 | HA2  | GLY | 44 | -3.165 | 8.090  | -1.491 | 1.00 | 0.00 | H |
| ATOM | 664 | HA3  | GLY | 44 | -1.535 | 8.469  | -2.121 | 1.00 | 0.00 | H |
| ATOM | 665 | N    | LEU | 45 | -0.576 | 6.997  | -0.276 | 1.00 | 0.00 | N |
| ATOM | 666 | CA   | LEU | 45 | 0.107  | 6.238  | 0.785  | 1.00 | 0.00 | C |
| ATOM | 667 | C    | LEU | 45 | 1.388  | 6.939  | 1.268  | 1.00 | 0.00 | C |
| ATOM | 668 | O    | LEU | 45 | 2.319  | 7.122  | 0.488  | 1.00 | 0.00 | O |
| ATOM | 669 | CB   | LEU | 45 | 0.437  | 4.809  | 0.289  | 1.00 | 0.00 | C |
| ATOM | 670 | CG   | LEU | 45 | -0.759 | 3.851  | 0.104  | 1.00 | 0.00 | C |
| ATOM | 671 | CD1  | LEU | 45 | -0.259 | 2.508  | -0.452 | 1.00 | 0.00 | C |
| ATOM | 672 | CD2  | LEU | 45 | -1.509 | 3.580  | 1.415  | 1.00 | 0.00 | C |
| ATOM | 673 | H    | LEU | 45 | -0.166 | 6.962  | -1.201 | 1.00 | 0.00 | H |
| ATOM | 674 | HA   | LEU | 45 | -0.551 | 6.161  | 1.644  | 1.00 | 0.00 | H |
| ATOM | 675 | HB2  | LEU | 45 | 0.963  | 4.897  | -0.663 | 1.00 | 0.00 | H |
| ATOM | 676 | HB3  | LEU | 45 | 1.126  | 4.352  | 1.001  | 1.00 | 0.00 | H |
| ATOM | 677 | HG   | LEU | 45 | -1.456 | 4.285  | -0.611 | 1.00 | 0.00 | H |
| ATOM | 678 | HD11 | LEU | 45 | 0.394  | 2.018  | 0.271  | 1.00 | 0.00 | H |
| ATOM | 679 | HD12 | LEU | 45 | -1.109 | 1.857  | -0.666 | 1.00 | 0.00 | H |
| ATOM | 680 | HD13 | LEU | 45 | 0.296  | 2.673  | -1.372 | 1.00 | 0.00 | H |

|      |     |      |     |    |        |        |        |      |      |   |
|------|-----|------|-----|----|--------|--------|--------|------|------|---|
| ATOM | 681 | HD21 | LEU | 45 | -1.899 | 4.507  | 1.819  | 1.00 | 0.00 | H |
| ATOM | 682 | HD22 | LEU | 45 | -2.344 | 2.904  | 1.227  | 1.00 | 0.00 | H |
| ATOM | 683 | HD23 | LEU | 45 | -0.841 | 3.123  | 2.146  | 1.00 | 0.00 | H |
| ATOM | 684 | N    | GLU | 46 | 1.470  | 7.252  | 2.567  | 1.00 | 0.00 | N |
| ATOM | 685 | CA   | GLU | 46 | 2.727  | 7.557  | 3.266  | 1.00 | 0.00 | C |
| ATOM | 686 | C    | GLU | 46 | 3.175  | 6.339  | 4.083  | 1.00 | 0.00 | C |
| ATOM | 687 | O    | GLU | 46 | 2.425  | 5.872  | 4.941  | 1.00 | 0.00 | O |
| ATOM | 688 | CB   | GLU | 46 | 2.544  | 8.717  | 4.262  | 1.00 | 0.00 | C |
| ATOM | 689 | CG   | GLU | 46 | 2.496  | 10.116 | 3.641  | 1.00 | 0.00 | C |
| ATOM | 690 | CD   | GLU | 46 | 2.261  | 11.165 | 4.728  | 1.00 | 0.00 | C |
| ATOM | 691 | OE1  | GLU | 46 | 3.028  | 12.148 | 4.863  | 1.00 | 0.00 | O |
| ATOM | 692 | OE2  | GLU | 46 | 1.250  | 11.068 | 5.449  | 1.00 | 0.00 | O |
| ATOM | 693 | H    | GLU | 46 | 0.667  | 7.051  | 3.151  | 1.00 | 0.00 | H |
| ATOM | 694 | HA   | GLU | 46 | 3.511  | 7.818  | 2.556  | 1.00 | 0.00 | H |
| ATOM | 695 | HB2  | GLU | 46 | 1.624  | 8.546  | 4.822  | 1.00 | 0.00 | H |
| ATOM | 696 | HB3  | GLU | 46 | 3.374  | 8.701  | 4.973  | 1.00 | 0.00 | H |
| ATOM | 697 | HG2  | GLU | 46 | 3.439  | 10.316 | 3.131  | 1.00 | 0.00 | H |
| ATOM | 698 | HG3  | GLU | 46 | 1.680  | 10.164 | 2.916  | 1.00 | 0.00 | H |
| ATOM | 699 | N    | TRP | 47 | 4.408  | 5.860  | 3.892  | 1.00 | 0.00 | N |
| ATOM | 700 | CA   | TRP | 47 | 5.055  | 5.038  | 4.915  | 1.00 | 0.00 | C |
| ATOM | 701 | C    | TRP | 47 | 5.313  | 5.888  | 6.170  | 1.00 | 0.00 | C |
| ATOM | 702 | O    | TRP | 47 | 5.731  | 7.036  | 6.062  | 1.00 | 0.00 | O |
| ATOM | 703 | CB   | TRP | 47 | 6.336  | 4.416  | 4.354  | 1.00 | 0.00 | C |
| ATOM | 704 | CG   | TRP | 47 | 7.308  | 3.945  | 5.388  | 1.00 | 0.00 | C |
| ATOM | 705 | CD1  | TRP | 47 | 7.182  | 2.843  | 6.161  | 1.00 | 0.00 | C |
| ATOM | 706 | CD2  | TRP | 47 | 8.562  | 4.579  | 5.790  | 1.00 | 0.00 | C |
| ATOM | 707 | CE2  | TRP | 47 | 9.146  | 3.801  | 6.831  | 1.00 | 0.00 | C |
| ATOM | 708 | CE3  | TRP | 47 | 9.276  | 5.720  | 5.365  | 1.00 | 0.00 | C |
| ATOM | 709 | NE1  | TRP | 47 | 8.265  | 2.755  | 7.013  | 1.00 | 0.00 | N |
| ATOM | 710 | CZ2  | TRP | 47 | 10.372 | 4.142  | 7.419  | 1.00 | 0.00 | C |
| ATOM | 711 | CZ3  | TRP | 47 | 10.509 | 6.070  | 5.948  | 1.00 | 0.00 | C |
| ATOM | 712 | CH2  | TRP | 47 | 11.060 | 5.281  | 6.971  | 1.00 | 0.00 | C |
| ATOM | 713 | H    | TRP | 47 | 4.996  | 6.268  | 3.185  | 1.00 | 0.00 | H |
| ATOM | 714 | HA   | TRP | 47 | 4.385  | 4.229  | 5.196  | 1.00 | 0.00 | H |
| ATOM | 715 | HB2  | TRP | 47 | 6.071  | 3.581  | 3.705  | 1.00 | 0.00 | H |
| ATOM | 716 | HB3  | TRP | 47 | 6.843  | 5.165  | 3.746  | 1.00 | 0.00 | H |
| ATOM | 717 | HD1  | TRP | 47 | 6.369  | 2.130  | 6.103  | 1.00 | 0.00 | H |
| ATOM | 718 | HE1  | TRP | 47 | 8.418  | 1.981  | 7.643  | 1.00 | 0.00 | H |
| ATOM | 719 | HE3  | TRP | 47 | 8.877  | 6.321  | 4.560  | 1.00 | 0.00 | H |
| ATOM | 720 | HZ2  | TRP | 47 | 10.794 | 3.520  | 8.186  | 1.00 | 0.00 | H |
| ATOM | 721 | HZ3  | TRP | 47 | 11.042 | 6.939  | 5.584  | 1.00 | 0.00 | H |
| ATOM | 722 | HH2  | TRP | 47 | 12.014 | 5.550  | 7.396  | 1.00 | 0.00 | H |
| ATOM | 723 | N    | VAL | 48 | 5.037  | 5.333  | 7.351  | 1.00 | 0.00 | N |
| ATOM | 724 | CA   | VAL | 48 | 5.008  | 6.091  | 8.614  | 1.00 | 0.00 | C |
| ATOM | 725 | C    | VAL | 48 | 6.307  | 5.877  | 9.399  | 1.00 | 0.00 | C |
| ATOM | 726 | O    | VAL | 48 | 7.077  | 6.812  | 9.625  | 1.00 | 0.00 | O |
| ATOM | 727 | CB   | VAL | 48 | 3.773  | 5.699  | 9.463  | 1.00 | 0.00 | C |
| ATOM | 728 | CG1  | VAL | 48 | 3.661  | 6.588  | 10.710 | 1.00 | 0.00 | C |
| ATOM | 729 | CG2  | VAL | 48 | 2.464  | 5.842  | 8.668  | 1.00 | 0.00 | C |
| ATOM | 730 | H    | VAL | 48 | 4.717  | 4.366  | 7.346  | 1.00 | 0.00 | H |
| ATOM | 731 | HA   | VAL | 48 | 4.920  | 7.154  | 8.390  | 1.00 | 0.00 | H |
| ATOM | 732 | HB   | VAL | 48 | 3.861  | 4.662  | 9.791  | 1.00 | 0.00 | H |
| ATOM | 733 | HG11 | VAL | 48 | 3.564  | 7.630  | 10.411 | 1.00 | 0.00 | H |
| ATOM | 734 | HG12 | VAL | 48 | 2.781  | 6.315  | 11.288 | 1.00 | 0.00 | H |
| ATOM | 735 | HG13 | VAL | 48 | 4.540  | 6.468  | 11.343 | 1.00 | 0.00 | H |
| ATOM | 736 | HG21 | VAL | 48 | 2.448  | 5.149  | 7.827  | 1.00 | 0.00 | H |
| ATOM | 737 | HG22 | VAL | 48 | 1.612  | 5.612  | 9.307  | 1.00 | 0.00 | H |

|      |     |      |     |    |        |        |        |      |      |   |
|------|-----|------|-----|----|--------|--------|--------|------|------|---|
| ATOM | 738 | HG23 | VAL | 48 | 2.375  | 6.859  | 8.293  | 1.00 | 0.00 | H |
| ATOM | 739 | N    | ALA | 49 | 6.553  | 4.631  | 9.807  | 1.00 | 0.00 | N |
| ATOM | 740 | CA   | ALA | 49 | 7.652  | 4.225  | 10.669 | 1.00 | 0.00 | C |
| ATOM | 741 | C    | ALA | 49 | 7.923  | 2.734  | 10.458 | 1.00 | 0.00 | C |
| ATOM | 742 | O    | ALA | 49 | 6.976  | 1.957  | 10.293 | 1.00 | 0.00 | O |
| ATOM | 743 | CB   | ALA | 49 | 7.282  | 4.524  | 12.130 | 1.00 | 0.00 | C |
| ATOM | 744 | H    | ALA | 49 | 5.912  | 3.896  | 9.538  | 1.00 | 0.00 | H |
| ATOM | 745 | HA   | ALA | 49 | 8.549  | 4.784  | 10.398 | 1.00 | 0.00 | H |
| ATOM | 746 | HB1  | ALA | 49 | 6.434  | 3.913  | 12.438 | 1.00 | 0.00 | H |
| ATOM | 747 | HB2  | ALA | 49 | 8.135  | 4.297  | 12.769 | 1.00 | 0.00 | H |
| ATOM | 748 | HB3  | ALA | 49 | 7.025  | 5.575  | 12.242 | 1.00 | 0.00 | H |
| ATOM | 749 | N    | GLU | 50 | 9.194  | 2.341  | 10.470 | 1.00 | 0.00 | N |
| ATOM | 750 | CA   | GLU | 50 | 9.619  | 0.940  | 10.454 | 1.00 | 0.00 | C |
| ATOM | 751 | C    | GLU | 50 | 10.353 | 0.585  | 11.751 | 1.00 | 0.00 | C |
| ATOM | 752 | O    | GLU | 50 | 10.971 | 1.438  | 12.395 | 1.00 | 0.00 | O |
| ATOM | 753 | CB   | GLU | 50 | 10.491 | 0.617  | 9.223  | 1.00 | 0.00 | C |
| ATOM | 754 | CG   | GLU | 50 | 11.916 | 1.165  | 9.341  | 1.00 | 0.00 | C |
| ATOM | 755 | CD   | GLU | 50 | 12.705 | 1.003  | 8.047  | 1.00 | 0.00 | C |
| ATOM | 756 | OE1  | GLU | 50 | 12.575 | 1.835  | 7.115  | 1.00 | 0.00 | O |
| ATOM | 757 | OE2  | GLU | 50 | 13.523 | 0.062  | 8.009  | 1.00 | 0.00 | O |
| ATOM | 758 | H    | GLU | 50 | 9.910  | 3.042  | 10.648 | 1.00 | 0.00 | H |
| ATOM | 759 | HA   | GLU | 50 | 8.737  | 0.304  | 10.405 | 1.00 | 0.00 | H |
| ATOM | 760 | HB2  | GLU | 50 | 10.549 | -0.468 | 9.116  | 1.00 | 0.00 | H |
| ATOM | 761 | HB3  | GLU | 50 | 10.009 | 1.012  | 8.327  | 1.00 | 0.00 | H |
| ATOM | 762 | HG2  | GLU | 50 | 11.886 | 2.209  | 9.631  | 1.00 | 0.00 | H |
| ATOM | 763 | HG3  | GLU | 50 | 12.438 | 0.614  | 10.126 | 1.00 | 0.00 | H |
| ATOM | 764 | N    | ILE | 51 | 10.329 | -0.703 | 12.086 | 1.00 | 0.00 | N |
| ATOM | 765 | CA   | ILE | 51 | 11.149 | -1.300 | 13.140 | 1.00 | 0.00 | C |
| ATOM | 766 | C    | ILE | 51 | 11.789 | -2.606 | 12.659 | 1.00 | 0.00 | C |
| ATOM | 767 | O    | ILE | 51 | 11.126 | -3.558 | 12.221 | 1.00 | 0.00 | O |
| ATOM | 768 | CB   | ILE | 51 | 10.360 | -1.438 | 14.458 | 1.00 | 0.00 | C |
| ATOM | 769 | CG1  | ILE | 51 | 11.311 | -1.936 | 15.567 | 1.00 | 0.00 | C |
| ATOM | 770 | CG2  | ILE | 51 | 9.099  | -2.319 | 14.342 | 1.00 | 0.00 | C |
| ATOM | 771 | CD1  | ILE | 51 | 10.796 | -1.600 | 16.964 | 1.00 | 0.00 | C |
| ATOM | 772 | H    | ILE | 51 | 9.746  | -1.335 | 11.539 | 1.00 | 0.00 | H |
| ATOM | 773 | HA   | ILE | 51 | 11.970 | -0.604 | 13.341 | 1.00 | 0.00 | H |
| ATOM | 774 | HB   | ILE | 51 | 10.032 | -0.433 | 14.727 | 1.00 | 0.00 | H |
| ATOM | 775 | HG12 | ILE | 51 | 11.445 | -3.014 | 15.481 | 1.00 | 0.00 | H |
| ATOM | 776 | HG13 | ILE | 51 | 12.284 | -1.463 | 15.451 | 1.00 | 0.00 | H |
| ATOM | 777 | HG21 | ILE | 51 | 9.371  | -3.342 | 14.091 | 1.00 | 0.00 | H |
| ATOM | 778 | HG22 | ILE | 51 | 8.546  | -2.321 | 15.280 | 1.00 | 0.00 | H |
| ATOM | 779 | HG23 | ILE | 51 | 8.442  | -1.925 | 13.571 | 1.00 | 0.00 | H |
| ATOM | 780 | HD11 | ILE | 51 | 9.811  | -2.035 | 17.116 | 1.00 | 0.00 | H |
| ATOM | 781 | HD12 | ILE | 51 | 11.482 | -1.999 | 17.711 | 1.00 | 0.00 | H |
| ATOM | 782 | HD13 | ILE | 51 | 10.738 | -0.518 | 17.081 | 1.00 | 0.00 | H |
| ATOM | 783 | N    | ARG | 52 | 13.120 | -2.624 | 12.731 | 1.00 | 0.00 | N |
| ATOM | 784 | CA   | ARG | 52 | 13.942 | -3.747 | 12.285 | 1.00 | 0.00 | C |
| ATOM | 785 | C    | ARG | 52 | 14.026 | -4.819 | 13.384 | 1.00 | 0.00 | C |
| ATOM | 786 | O    | ARG | 52 | 13.340 | -4.740 | 14.408 | 1.00 | 0.00 | O |
| ATOM | 787 | CB   | ARG | 52 | 15.291 | -3.219 | 11.754 | 1.00 | 0.00 | C |
| ATOM | 788 | CG   | ARG | 52 | 15.043 | -2.220 | 10.605 | 1.00 | 0.00 | C |
| ATOM | 789 | CD   | ARG | 52 | 16.295 | -1.829 | 9.812  | 1.00 | 0.00 | C |
| ATOM | 790 | NE   | ARG | 52 | 15.903 | -0.927 | 8.722  | 1.00 | 0.00 | N |
| ATOM | 791 | CZ   | ARG | 52 | 16.583 | -0.466 | 7.687  | 1.00 | 0.00 | C |
| ATOM | 792 | NH1  | ARG | 52 | 17.850 | -0.748 | 7.482  | 1.00 | 0.00 | N |
| ATOM | 793 | NH2  | ARG | 52 | 15.948 | 0.296  | 6.829  | 1.00 | 0.00 | N |
| ATOM | 794 | H    | ARG | 52 | 13.598 | -1.811 | 13.113 | 1.00 | 0.00 | H |

|      |     |      |     |    |        |         |        |      |      |   |
|------|-----|------|-----|----|--------|---------|--------|------|------|---|
| ATOM | 795 | HA   | ARG | 52 | 13.438 | -4.217  | 11.440 | 1.00 | 0.00 | H |
| ATOM | 796 | HB2  | ARG | 52 | 15.855 | -2.739  | 12.555 | 1.00 | 0.00 | H |
| ATOM | 797 | HB3  | ARG | 52 | 15.871 | -4.053  | 11.364 | 1.00 | 0.00 | H |
| ATOM | 798 | HG2  | ARG | 52 | 14.327 | -2.663  | 9.910  | 1.00 | 0.00 | H |
| ATOM | 799 | HG3  | ARG | 52 | 14.600 | -1.307  | 11.009 | 1.00 | 0.00 | H |
| ATOM | 800 | HD2  | ARG | 52 | 17.000 | -1.323  | 10.473 | 1.00 | 0.00 | H |
| ATOM | 801 | HD3  | ARG | 52 | 16.753 | -2.725  | 9.398  | 1.00 | 0.00 | H |
| ATOM | 802 | HE   | ARG | 52 | 14.925 | -0.621  | 8.734  | 1.00 | 0.00 | H |
| ATOM | 803 | HH11 | ARG | 52 | 18.307 | -1.380  | 8.113  | 1.00 | 0.00 | H |
| ATOM | 804 | HH12 | ARG | 52 | 18.313 | -0.407  | 6.659  | 1.00 | 0.00 | H |
| ATOM | 805 | HH21 | ARG | 52 | 14.951 | 0.450   | 7.037  | 1.00 | 0.00 | H |
| ATOM | 806 | HH22 | ARG | 52 | 16.383 | 0.707   | 6.029  | 1.00 | 0.00 | H |
| ATOM | 807 | N    | LEU | 53 | 14.813 | -5.880  | 13.169 | 1.00 | 0.00 | N |
| ATOM | 808 | CA   | LEU | 53 | 14.826 | -7.029  | 14.083 | 1.00 | 0.00 | C |
| ATOM | 809 | C    | LEU | 53 | 15.491 | -6.741  | 15.432 | 1.00 | 0.00 | C |
| ATOM | 810 | O    | LEU | 53 | 16.312 | -5.839  | 15.592 | 1.00 | 0.00 | O |
| ATOM | 811 | CB   | LEU | 53 | 15.476 | -8.262  | 13.415 | 1.00 | 0.00 | C |
| ATOM | 812 | CG   | LEU | 53 | 14.554 | -9.142  | 12.544 | 1.00 | 0.00 | C |
| ATOM | 813 | CD1  | LEU | 53 | 15.353 | -10.360 | 12.044 | 1.00 | 0.00 | C |
| ATOM | 814 | CD2  | LEU | 53 | 13.273 | -9.566  | 13.284 | 1.00 | 0.00 | C |
| ATOM | 815 | H    | LEU | 53 | 15.412 | -5.894  | 12.353 | 1.00 | 0.00 | H |
| ATOM | 816 | HA   | LEU | 53 | 13.791 | -7.253  | 14.335 | 1.00 | 0.00 | H |
| ATOM | 817 | HB2  | LEU | 53 | 15.870 | -8.910  | 14.197 | 1.00 | 0.00 | H |
| ATOM | 818 | HB3  | LEU | 53 | 16.329 | -7.942  | 12.819 | 1.00 | 0.00 | H |
| ATOM | 819 | HG   | LEU | 53 | 14.248 | -8.575  | 11.674 | 1.00 | 0.00 | H |
| ATOM | 820 | HD11 | LEU | 53 | 16.238 | -10.540 | 12.655 | 1.00 | 0.00 | H |
| ATOM | 821 | HD12 | LEU | 53 | 14.740 | -11.263 | 12.066 | 1.00 | 0.00 | H |
| ATOM | 822 | HD13 | LEU | 53 | 15.668 | -10.187 | 11.015 | 1.00 | 0.00 | H |
| ATOM | 823 | HD21 | LEU | 53 | 12.716 | -10.274 | 12.677 | 1.00 | 0.00 | H |
| ATOM | 824 | HD22 | LEU | 53 | 13.520 | -10.024 | 14.242 | 1.00 | 0.00 | H |
| ATOM | 825 | HD23 | LEU | 53 | 12.618 | -8.711  | 13.439 | 1.00 | 0.00 | H |
| ATOM | 826 | N    | LYS | 54 | 15.201 | -7.634  | 16.381 | 1.00 | 0.00 | N |
| ATOM | 827 | CA   | LYS | 54 | 15.892 | -7.783  | 17.665 | 1.00 | 0.00 | C |
| ATOM | 828 | C    | LYS | 54 | 17.420 | -7.873  | 17.495 | 1.00 | 0.00 | C |
| ATOM | 829 | O    | LYS | 54 | 18.164 | -7.154  | 18.146 | 1.00 | 0.00 | O |
| ATOM | 830 | CB   | LYS | 54 | 15.289 | -9.042  | 18.313 | 1.00 | 0.00 | C |
| ATOM | 831 | CG   | LYS | 54 | 15.625 | -9.218  | 19.801 | 1.00 | 0.00 | C |
| ATOM | 832 | CD   | LYS | 54 | 14.726 | -10.320 | 20.389 | 1.00 | 0.00 | C |
| ATOM | 833 | CE   | LYS | 54 | 14.749 | -10.308 | 21.922 | 1.00 | 0.00 | C |
| ATOM | 834 | NZ   | LYS | 54 | 13.566 | -11.007 | 22.486 | 1.00 | 0.00 | N |
| ATOM | 835 | H    | LYS | 54 | 14.497 | -8.323  | 16.165 | 1.00 | 0.00 | H |
| ATOM | 836 | HA   | LYS | 54 | 15.685 | -6.911  | 18.292 | 1.00 | 0.00 | H |
| ATOM | 837 | HB2  | LYS | 54 | 14.203 | -8.970  | 18.219 | 1.00 | 0.00 | H |
| ATOM | 838 | HB3  | LYS | 54 | 15.610 | -9.930  | 17.766 | 1.00 | 0.00 | H |
| ATOM | 839 | HG2  | LYS | 54 | 16.675 | -9.487  | 19.922 | 1.00 | 0.00 | H |
| ATOM | 840 | HG3  | LYS | 54 | 15.437 | -8.281  | 20.323 | 1.00 | 0.00 | H |
| ATOM | 841 | HD2  | LYS | 54 | 13.699 | -10.153 | 20.056 | 1.00 | 0.00 | H |
| ATOM | 842 | HD3  | LYS | 54 | 15.053 | -11.292 | 20.017 | 1.00 | 0.00 | H |
| ATOM | 843 | HE2  | LYS | 54 | 15.680 | -10.771 | 22.266 | 1.00 | 0.00 | H |
| ATOM | 844 | HE3  | LYS | 54 | 14.744 | -9.267  | 22.259 | 1.00 | 0.00 | H |
| ATOM | 845 | HZ1  | LYS | 54 | 13.495 | -11.952 | 22.129 | 1.00 | 0.00 | H |
| ATOM | 846 | HZ2  | LYS | 54 | 13.619 | -11.046 | 23.495 | 1.00 | 0.00 | H |
| ATOM | 847 | HZ3  | LYS | 54 | 12.721 | -10.508 | 22.234 | 1.00 | 0.00 | H |
| ATOM | 848 | N    | SER | 55 | 17.893 | -8.676  | 16.540 | 1.00 | 0.00 | N |
| ATOM | 849 | CA   | SER | 55 | 19.315 | -8.803  | 16.160 | 1.00 | 0.00 | C |
| ATOM | 850 | C    | SER | 55 | 19.847 | -7.637  | 15.305 | 1.00 | 0.00 | C |
| ATOM | 851 | O    | SER | 55 | 20.973 | -7.684  | 14.817 | 1.00 | 0.00 | O |



|      |     |      |     |    |        |         |        |      |      |   |
|------|-----|------|-----|----|--------|---------|--------|------|------|---|
| ATOM | 852 | CB   | SER | 55 | 19.529 | -10.123 | 15.408 | 1.00 | 0.00 | C |
| ATOM | 853 | OG   | SER | 55 | 18.895 | -11.192 | 16.089 | 1.00 | 0.00 | O |
| ATOM | 854 | H    | SER | 55 | 17.250 | -9.305  | 16.088 | 1.00 | 0.00 | H |
| ATOM | 855 | HA   | SER | 55 | 19.928 | -8.828  | 17.065 | 1.00 | 0.00 | H |
| ATOM | 856 | HB2  | SER | 55 | 19.106 | -10.038 | 14.405 | 1.00 | 0.00 | H |
| ATOM | 857 | HB3  | SER | 55 | 20.599 | -10.320 | 15.324 | 1.00 | 0.00 | H |
| ATOM | 858 | HG   | SER | 55 | 19.103 | -12.018 | 15.635 | 1.00 | 0.00 | H |
| ATOM | 859 | N    | ASN | 56 | 19.044 | -6.596  | 15.079 | 1.00 | 0.00 | N |
| ATOM | 860 | CA   | ASN | 56 | 19.488 | -5.299  | 14.553 | 1.00 | 0.00 | C |
| ATOM | 861 | C    | ASN | 56 | 19.413 | -4.211  | 15.646 | 1.00 | 0.00 | C |
| ATOM | 862 | O    | ASN | 56 | 19.385 | -3.019  | 15.336 | 1.00 | 0.00 | O |
| ATOM | 863 | CB   | ASN | 56 | 18.633 | -4.910  | 13.331 | 1.00 | 0.00 | C |
| ATOM | 864 | CG   | ASN | 56 | 18.513 | -5.973  | 12.244 | 1.00 | 0.00 | C |
| ATOM | 865 | ND2  | ASN | 56 | 19.449 | -6.894  | 12.100 | 1.00 | 0.00 | N |
| ATOM | 866 | OD1  | ASN | 56 | 17.537 | -5.995  | 11.511 | 1.00 | 0.00 | O |
| ATOM | 867 | H    | ASN | 56 | 18.099 | -6.630  | 15.439 | 1.00 | 0.00 | H |
| ATOM | 868 | HA   | ASN | 56 | 20.529 | -5.366  | 14.238 | 1.00 | 0.00 | H |
| ATOM | 869 | HB2  | ASN | 56 | 17.629 | -4.654  | 13.670 | 1.00 | 0.00 | H |
| ATOM | 870 | HB3  | ASN | 56 | 19.071 | -4.021  | 12.877 | 1.00 | 0.00 | H |
| ATOM | 871 | HD21 | ASN | 56 | 19.340 | -7.574  | 11.368 | 1.00 | 0.00 | H |
| ATOM | 872 | HD22 | ASN | 56 | 20.214 | -6.955  | 12.765 | 1.00 | 0.00 | H |
| ATOM | 873 | N    | ASN | 57 | 19.281 | -4.618  | 16.916 | 1.00 | 0.00 | N |
| ATOM | 874 | CA   | ASN | 57 | 19.106 | -3.760  | 18.093 | 1.00 | 0.00 | C |
| ATOM | 875 | C    | ASN | 57 | 17.795 | -2.944  | 18.045 | 1.00 | 0.00 | C |
| ATOM | 876 | O    | ASN | 57 | 17.732 | -1.850  | 18.600 | 1.00 | 0.00 | O |
| ATOM | 877 | CB   | ASN | 57 | 20.363 | -2.900  | 18.331 | 1.00 | 0.00 | C |
| ATOM | 878 | CG   | ASN | 57 | 21.631 | -3.743  | 18.393 | 1.00 | 0.00 | C |
| ATOM | 879 | ND2  | ASN | 57 | 22.654 | -3.384  | 17.640 | 1.00 | 0.00 | N |
| ATOM | 880 | OD1  | ASN | 57 | 21.709 | -4.740  | 19.091 | 1.00 | 0.00 | O |
| ATOM | 881 | H    | ASN | 57 | 19.296 | -5.614  | 17.096 | 1.00 | 0.00 | H |
| ATOM | 882 | HA   | ASN | 57 | 19.011 | -4.429  | 18.949 | 1.00 | 0.00 | H |
| ATOM | 883 | HB2  | ASN | 57 | 20.452 | -2.151  | 17.544 | 1.00 | 0.00 | H |
| ATOM | 884 | HB3  | ASN | 57 | 20.265 | -2.373  | 19.281 | 1.00 | 0.00 | H |
| ATOM | 885 | HD21 | ASN | 57 | 23.487 | -3.947  | 17.698 | 1.00 | 0.00 | H |
| ATOM | 886 | HD22 | ASN | 57 | 22.595 | -2.568  | 17.059 | 1.00 | 0.00 | H |
| ATOM | 887 | N    | TYR | 58 | 16.767 | -3.453  | 17.341 | 1.00 | 0.00 | N |
| ATOM | 888 | CA   | TYR | 58 | 15.441 | -2.833  | 17.180 | 1.00 | 0.00 | C |
| ATOM | 889 | C    | TYR | 58 | 15.459 | -1.426  | 16.536 | 1.00 | 0.00 | C |
| ATOM | 890 | O    | TYR | 58 | 14.509 | -0.662  | 16.693 | 1.00 | 0.00 | O |
| ATOM | 891 | CB   | TYR | 58 | 14.668 | -2.871  | 18.515 | 1.00 | 0.00 | C |
| ATOM | 892 | CG   | TYR | 58 | 14.191 | -4.239  | 18.959 | 1.00 | 0.00 | C |
| ATOM | 893 | CD1  | TYR | 58 | 13.352 | -4.994  | 18.116 | 1.00 | 0.00 | C |
| ATOM | 894 | CD2  | TYR | 58 | 14.495 | -4.717  | 20.248 | 1.00 | 0.00 | C |
| ATOM | 895 | CE1  | TYR | 58 | 12.802 | -6.205  | 18.567 | 1.00 | 0.00 | C |
| ATOM | 896 | CE2  | TYR | 58 | 13.933 | -5.924  | 20.711 | 1.00 | 0.00 | C |
| ATOM | 897 | CZ   | TYR | 58 | 13.063 | -6.661  | 19.878 | 1.00 | 0.00 | C |
| ATOM | 898 | OH   | TYR | 58 | 12.465 | -7.800  | 20.328 | 1.00 | 0.00 | O |
| ATOM | 899 | H    | TYR | 58 | 16.908 | -4.345  | 16.886 | 1.00 | 0.00 | H |
| ATOM | 900 | HA   | TYR | 58 | 14.893 | -3.449  | 16.468 | 1.00 | 0.00 | H |
| ATOM | 901 | HB2  | TYR | 58 | 15.268 | -2.413  | 19.303 | 1.00 | 0.00 | H |
| ATOM | 902 | HB3  | TYR | 58 | 13.769 | -2.263  | 18.421 | 1.00 | 0.00 | H |
| ATOM | 903 | HD1  | TYR | 58 | 13.109 | -4.628  | 17.128 | 1.00 | 0.00 | H |
| ATOM | 904 | HD2  | TYR | 58 | 15.128 | -4.130  | 20.900 | 1.00 | 0.00 | H |
| ATOM | 905 | HE1  | TYR | 58 | 12.158 | -6.781  | 17.923 | 1.00 | 0.00 | H |
| ATOM | 906 | HE2  | TYR | 58 | 14.131 | -6.259  | 21.718 | 1.00 | 0.00 | H |
| ATOM | 907 | HH   | TYR | 58 | 11.773 | -8.092  | 19.705 | 1.00 | 0.00 | H |
| ATOM | 908 | N    | ALA | 59 | 16.521 | -1.092  | 15.790 | 1.00 | 0.00 | N |

|      |     |      |     |    |        |        |        |      |      |   |
|------|-----|------|-----|----|--------|--------|--------|------|------|---|
| ATOM | 909 | CA   | ALA | 59 | 16.662 | 0.173  | 15.062 | 1.00 | 0.00 | C |
| ATOM | 910 | C    | ALA | 59 | 15.404 | 0.548  | 14.245 | 1.00 | 0.00 | C |
| ATOM | 911 | O    | ALA | 59 | 14.800 | -0.313 | 13.591 | 1.00 | 0.00 | O |
| ATOM | 912 | CB   | ALA | 59 | 17.906 | 0.076  | 14.170 | 1.00 | 0.00 | C |
| ATOM | 913 | H    | ALA | 59 | 17.295 | -1.738 | 15.758 | 1.00 | 0.00 | H |
| ATOM | 914 | HA   | ALA | 59 | 16.824 | 0.962  | 15.801 | 1.00 | 0.00 | H |
| ATOM | 915 | HB1  | ALA | 59 | 17.763 | -0.704 | 13.420 | 1.00 | 0.00 | H |
| ATOM | 916 | HB2  | ALA | 59 | 18.067 | 1.029  | 13.665 | 1.00 | 0.00 | H |
| ATOM | 917 | HB3  | ALA | 59 | 18.784 | -0.160 | 14.774 | 1.00 | 0.00 | H |
| ATOM | 918 | N    | THR | 60 | 15.040 | 1.839  | 14.287 | 1.00 | 0.00 | N |
| ATOM | 919 | CA   | THR | 60 | 13.844 | 2.419  | 13.664 | 1.00 | 0.00 | C |
| ATOM | 920 | C    | THR | 60 | 14.208 | 3.525  | 12.677 | 1.00 | 0.00 | C |
| ATOM | 921 | O    | THR | 60 | 15.215 | 4.215  | 12.819 | 1.00 | 0.00 | O |
| ATOM | 922 | CB   | THR | 60 | 12.877 | 2.972  | 14.723 | 1.00 | 0.00 | C |
| ATOM | 923 | CG2  | THR | 60 | 12.454 | 1.919  | 15.744 | 1.00 | 0.00 | C |
| ATOM | 924 | OG1  | THR | 60 | 13.466 | 4.019  | 15.460 | 1.00 | 0.00 | O |
| ATOM | 925 | H    | THR | 60 | 15.595 | 2.485  | 14.825 | 1.00 | 0.00 | H |
| ATOM | 926 | HA   | THR | 60 | 13.321 | 1.644  | 13.105 | 1.00 | 0.00 | H |
| ATOM | 927 | HB   | THR | 60 | 11.985 | 3.349  | 14.219 | 1.00 | 0.00 | H |
| ATOM | 928 | HG1  | THR | 60 | 12.755 | 4.443  | 15.951 | 1.00 | 0.00 | H |
| ATOM | 929 | HG21 | THR | 60 | 13.310 | 1.603  | 16.337 | 1.00 | 0.00 | H |
| ATOM | 930 | HG22 | THR | 60 | 11.709 | 2.336  | 16.420 | 1.00 | 0.00 | H |
| ATOM | 931 | HG23 | THR | 60 | 12.035 | 1.057  | 15.228 | 1.00 | 0.00 | H |
| ATOM | 932 | N    | HIE | 61 | 13.347 | 3.703  | 11.678 | 1.00 | 0.00 | N |
| ATOM | 933 | CA   | HIE | 61 | 13.410 | 4.782  | 10.694 | 1.00 | 0.00 | C |
| ATOM | 934 | C    | HIE | 61 | 11.993 | 5.326  | 10.447 | 1.00 | 0.00 | C |
| ATOM | 935 | O    | HIE | 61 | 10.999 | 4.620  | 10.630 | 1.00 | 0.00 | O |
| ATOM | 936 | CB   | HIE | 61 | 14.077 | 4.301  | 9.387  | 1.00 | 0.00 | C |
| ATOM | 937 | CG   | HIE | 61 | 15.450 | 3.699  | 9.544  | 1.00 | 0.00 | C |
| ATOM | 938 | CD2  | HIE | 61 | 16.625 | 4.396  | 9.528  | 1.00 | 0.00 | C |
| ATOM | 939 | ND1  | HIE | 61 | 15.733 | 2.340  | 9.699  | 1.00 | 0.00 | N |
| ATOM | 940 | CE1  | HIE | 61 | 17.065 | 2.259  | 9.832  | 1.00 | 0.00 | C |
| ATOM | 941 | NE2  | HIE | 61 | 17.629 | 3.476  | 9.728  | 1.00 | 0.00 | N |
| ATOM | 942 | H    | HIE | 61 | 12.515 | 3.130  | 11.680 | 1.00 | 0.00 | H |
| ATOM | 943 | HA   | HIE | 61 | 14.012 | 5.596  | 11.107 | 1.00 | 0.00 | H |
| ATOM | 944 | HB2  | HIE | 61 | 13.439 | 3.570  | 8.905  | 1.00 | 0.00 | H |
| ATOM | 945 | HB3  | HIE | 61 | 14.159 | 5.152  | 8.709  | 1.00 | 0.00 | H |
| ATOM | 946 | HD2  | HIE | 61 | 16.735 | 5.466  | 9.432  | 1.00 | 0.00 | H |
| ATOM | 947 | HE1  | HIE | 61 | 17.605 | 1.341  | 10.018 | 1.00 | 0.00 | H |
| ATOM | 948 | HE2  | HIE | 61 | 18.614 | 3.678  | 9.839  | 1.00 | 0.00 | H |
| ATOM | 949 | N    | TYR | 62 | 11.890 | 6.590  | 10.032 | 1.00 | 0.00 | N |
| ATOM | 950 | CA   | TYR | 62 | 10.619 | 7.316  | 9.902  | 1.00 | 0.00 | C |
| ATOM | 951 | C    | TYR | 62 | 10.621 | 8.208  | 8.660  | 1.00 | 0.00 | C |
| ATOM | 952 | O    | TYR | 62 | 11.675 | 8.718  | 8.275  | 1.00 | 0.00 | O |
| ATOM | 953 | CB   | TYR | 62 | 10.410 | 8.214  | 11.134 | 1.00 | 0.00 | C |
| ATOM | 954 | CG   | TYR | 62 | 10.532 | 7.539  | 12.487 | 1.00 | 0.00 | C |
| ATOM | 955 | CD1  | TYR | 62 | 9.379  | 7.136  | 13.181 | 1.00 | 0.00 | C |
| ATOM | 956 | CD2  | TYR | 62 | 11.804 | 7.334  | 13.059 | 1.00 | 0.00 | C |
| ATOM | 957 | CE1  | TYR | 62 | 9.496  | 6.486  | 14.425 | 1.00 | 0.00 | C |
| ATOM | 958 | CE2  | TYR | 62 | 11.929 | 6.694  | 14.303 | 1.00 | 0.00 | C |
| ATOM | 959 | CZ   | TYR | 62 | 10.774 | 6.259  | 14.988 | 1.00 | 0.00 | C |
| ATOM | 960 | OH   | TYR | 62 | 10.897 | 5.622  | 16.184 | 1.00 | 0.00 | O |
| ATOM | 961 | H    | TYR | 62 | 12.733 | 7.102  | 9.825  | 1.00 | 0.00 | H |
| ATOM | 962 | HA   | TYR | 62 | 9.788  | 6.615  | 9.819  | 1.00 | 0.00 | H |
| ATOM | 963 | HB2  | TYR | 62 | 11.146 | 9.012  | 11.097 | 1.00 | 0.00 | H |
| ATOM | 964 | HB3  | TYR | 62 | 9.426  | 8.680  | 11.060 | 1.00 | 0.00 | H |
| ATOM | 965 | HD1  | TYR | 62 | 8.402  | 7.321  | 12.758 | 1.00 | 0.00 | H |

|      |      |      |     |    |        |        |        |      |      |   |
|------|------|------|-----|----|--------|--------|--------|------|------|---|
| ATOM | 966  | HD2  | TYR | 62 | 12.694 | 7.649  | 12.533 | 1.00 | 0.00 | H |
| ATOM | 967  | HE1  | TYR | 62 | 8.608  | 6.173  | 14.951 | 1.00 | 0.00 | H |
| ATOM | 968  | HE2  | TYR | 62 | 12.907 | 6.524  | 14.729 | 1.00 | 0.00 | H |
| ATOM | 969  | HH   | TYR | 62 | 10.043 | 5.403  | 16.551 | 1.00 | 0.00 | H |
| ATOM | 970  | N    | ALA | 63 | 9.437  | 8.463  | 8.096  | 1.00 | 0.00 | N |
| ATOM | 971  | CA   | ALA | 63 | 9.246  | 9.447  | 7.036  | 1.00 | 0.00 | C |
| ATOM | 972  | C    | ALA | 63 | 9.173  | 10.866 | 7.610  | 1.00 | 0.00 | C |
| ATOM | 973  | O    | ALA | 63 | 8.512  | 11.098 | 8.626  | 1.00 | 0.00 | O |
| ATOM | 974  | CB   | ALA | 63 | 7.965  | 9.115  | 6.271  | 1.00 | 0.00 | C |
| ATOM | 975  | H    | ALA | 63 | 8.611  | 8.004  | 8.459  | 1.00 | 0.00 | H |
| ATOM | 976  | HA   | ALA | 63 | 10.089 | 9.393  | 6.342  | 1.00 | 0.00 | H |
| ATOM | 977  | HB1  | ALA | 63 | 7.106  | 9.144  | 6.945  | 1.00 | 0.00 | H |
| ATOM | 978  | HB2  | ALA | 63 | 7.807  | 9.837  | 5.469  | 1.00 | 0.00 | H |
| ATOM | 979  | HB3  | ALA | 63 | 8.043  | 8.122  | 5.835  | 1.00 | 0.00 | H |
| ATOM | 980  | N    | GLU | 64 | 9.815  | 11.812 | 6.922  | 1.00 | 0.00 | N |
| ATOM | 981  | CA   | GLU | 64 | 9.980  | 13.218 | 7.328  | 1.00 | 0.00 | C |
| ATOM | 982  | C    | GLU | 64 | 8.702  | 13.911 | 7.833  | 1.00 | 0.00 | C |
| ATOM | 983  | O    | GLU | 64 | 8.782  | 14.811 | 8.662  | 1.00 | 0.00 | O |
| ATOM | 984  | CB   | GLU | 64 | 10.555 | 14.045 | 6.159  | 1.00 | 0.00 | C |
| ATOM | 985  | CG   | GLU | 64 | 11.744 | 13.412 | 5.424  | 1.00 | 0.00 | C |
| ATOM | 986  | CD   | GLU | 64 | 12.807 | 12.897 | 6.386  | 1.00 | 0.00 | C |
| ATOM | 987  | OE1  | GLU | 64 | 13.429 | 13.693 | 7.115  | 1.00 | 0.00 | O |
| ATOM | 988  | OE2  | GLU | 64 | 12.987 | 11.660 | 6.465  | 1.00 | 0.00 | O |
| ATOM | 989  | H    | GLU | 64 | 10.426 | 11.493 | 6.182  | 1.00 | 0.00 | H |
| ATOM | 990  | HA   | GLU | 64 | 10.704 | 13.246 | 8.142  | 1.00 | 0.00 | H |
| ATOM | 991  | HB2  | GLU | 64 | 9.766  | 14.228 | 5.427  | 1.00 | 0.00 | H |
| ATOM | 992  | HB3  | GLU | 64 | 10.872 | 15.010 | 6.549  | 1.00 | 0.00 | H |
| ATOM | 993  | HG2  | GLU | 64 | 11.388 | 12.589 | 4.799  | 1.00 | 0.00 | H |
| ATOM | 994  | HG3  | GLU | 64 | 12.191 | 14.154 | 4.761  | 1.00 | 0.00 | H |
| ATOM | 995  | N    | SER | 65 | 7.510  | 13.501 | 7.394  | 1.00 | 0.00 | N |
| ATOM | 996  | CA   | SER | 65 | 6.253  | 14.085 | 7.873  | 1.00 | 0.00 | C |
| ATOM | 997  | C    | SER | 65 | 5.920  | 13.739 | 9.340  | 1.00 | 0.00 | C |
| ATOM | 998  | O    | SER | 65 | 5.254  | 14.544 | 9.996  | 1.00 | 0.00 | O |
| ATOM | 999  | CB   | SER | 65 | 5.099  | 13.720 | 6.918  | 1.00 | 0.00 | C |
| ATOM | 1000 | OG   | SER | 65 | 5.138  | 12.377 | 6.463  | 1.00 | 0.00 | O |
| ATOM | 1001 | H    | SER | 65 | 7.443  | 12.720 | 6.750  | 1.00 | 0.00 | H |
| ATOM | 1002 | HA   | SER | 65 | 6.360  | 15.172 | 7.850  | 1.00 | 0.00 | H |
| ATOM | 1003 | HB2  | SER | 65 | 4.147  | 13.907 | 7.415  | 1.00 | 0.00 | H |
| ATOM | 1004 | HB3  | SER | 65 | 5.159  | 14.371 | 6.046  | 1.00 | 0.00 | H |
| ATOM | 1005 | HG   | SER | 65 | 4.390  | 12.233 | 5.831  | 1.00 | 0.00 | H |
| ATOM | 1006 | N    | VAL | 66 | 6.391  | 12.606 | 9.880  | 1.00 | 0.00 | N |
| ATOM | 1007 | CA   | VAL | 66 | 6.128  | 12.128 | 11.267 | 1.00 | 0.00 | C |
| ATOM | 1008 | C    | VAL | 66 | 7.395  | 11.934 | 12.118 | 1.00 | 0.00 | C |
| ATOM | 1009 | O    | VAL | 66 | 7.314  | 11.619 | 13.309 | 1.00 | 0.00 | O |
| ATOM | 1010 | CB   | VAL | 66 | 5.352  | 10.790 | 11.275 | 1.00 | 0.00 | C |
| ATOM | 1011 | CG1  | VAL | 66 | 3.947  | 10.956 | 10.686 | 1.00 | 0.00 | C |
| ATOM | 1012 | CG2  | VAL | 66 | 6.100  | 9.669  | 10.537 | 1.00 | 0.00 | C |
| ATOM | 1013 | H    | VAL | 66 | 6.979  | 12.029 | 9.274  | 1.00 | 0.00 | H |
| ATOM | 1014 | HA   | VAL | 66 | 5.519  | 12.874 | 11.777 | 1.00 | 0.00 | H |
| ATOM | 1015 | HB   | VAL | 66 | 5.225  | 10.477 | 12.310 | 1.00 | 0.00 | H |
| ATOM | 1016 | HG11 | VAL | 66 | 4.003  | 11.281 | 9.646  | 1.00 | 0.00 | H |
| ATOM | 1017 | HG12 | VAL | 66 | 3.421  | 10.002 | 10.730 | 1.00 | 0.00 | H |
| ATOM | 1018 | HG13 | VAL | 66 | 3.388  | 11.690 | 11.266 | 1.00 | 0.00 | H |
| ATOM | 1019 | HG21 | VAL | 66 | 7.107  | 9.547  | 10.939 | 1.00 | 0.00 | H |
| ATOM | 1020 | HG22 | VAL | 66 | 5.567  | 8.734  | 10.676 | 1.00 | 0.00 | H |
| ATOM | 1021 | HG23 | VAL | 66 | 6.160  | 9.887  | 9.470  | 1.00 | 0.00 | H |
| ATOM | 1022 | N    | LYS | 67 | 8.572  | 12.078 | 11.512 | 1.00 | 0.00 | N |

|      |      |      |     |    |        |        |        |      |      |   |
|------|------|------|-----|----|--------|--------|--------|------|------|---|
| ATOM | 1023 | CA   | LYS | 67 | 9.880  | 11.791 | 12.097 | 1.00 | 0.00 | C |
| ATOM | 1024 | C    | LYS | 67 | 10.142 | 12.628 | 13.361 | 1.00 | 0.00 | C |
| ATOM | 1025 | O    | LYS | 67 | 10.000 | 13.849 | 13.341 | 1.00 | 0.00 | O |
| ATOM | 1026 | CB   | LYS | 67 | 10.874 | 12.057 | 10.964 | 1.00 | 0.00 | C |
| ATOM | 1027 | CG   | LYS | 67 | 12.357 | 11.744 | 11.202 | 1.00 | 0.00 | C |
| ATOM | 1028 | CD   | LYS | 67 | 13.007 | 11.913 | 9.823  | 1.00 | 0.00 | C |
| ATOM | 1029 | CE   | LYS | 67 | 14.494 | 11.580 | 9.733  | 1.00 | 0.00 | C |
| ATOM | 1030 | NZ   | LYS | 67 | 14.916 | 11.803 | 8.332  | 1.00 | 0.00 | N |
| ATOM | 1031 | H    | LYS | 67 | 8.570  | 12.424 | 10.561 | 1.00 | 0.00 | H |
| ATOM | 1032 | HA   | LYS | 67 | 9.921  | 10.739 | 12.370 | 1.00 | 0.00 | H |
| ATOM | 1033 | HB2  | LYS | 67 | 10.547 | 11.448 | 10.123 | 1.00 | 0.00 | H |
| ATOM | 1034 | HB3  | LYS | 67 | 10.781 | 13.105 | 10.666 | 1.00 | 0.00 | H |
| ATOM | 1035 | HG2  | LYS | 67 | 12.784 | 12.452 | 11.911 | 1.00 | 0.00 | H |
| ATOM | 1036 | HG3  | LYS | 67 | 12.489 | 10.726 | 11.563 | 1.00 | 0.00 | H |
| ATOM | 1037 | HD2  | LYS | 67 | 12.493 | 11.269 | 9.109  | 1.00 | 0.00 | H |
| ATOM | 1038 | HD3  | LYS | 67 | 12.869 | 12.948 | 9.504  | 1.00 | 0.00 | H |
| ATOM | 1039 | HE2  | LYS | 67 | 15.051 | 12.233 | 10.408 | 1.00 | 0.00 | H |
| ATOM | 1040 | HE3  | LYS | 67 | 14.655 | 10.540 | 10.021 | 1.00 | 0.00 | H |
| ATOM | 1041 | HZ1  | LYS | 67 | 14.656 | 12.749 | 8.036  | 1.00 | 0.00 | H |
| ATOM | 1042 | HZ2  | LYS | 67 | 15.892 | 11.642 | 8.155  | 1.00 | 0.00 | H |
| ATOM | 1043 | HZ3  | LYS | 67 | 14.336 | 11.264 | 7.686  | 1.00 | 0.00 | H |
| ATOM | 1044 | N    | GLY | 68 | 10.463 | 11.965 | 14.478 | 1.00 | 0.00 | N |
| ATOM | 1045 | CA   | GLY | 68 | 10.664 | 12.604 | 15.790 | 1.00 | 0.00 | C |
| ATOM | 1046 | C    | GLY | 68 | 9.376  | 12.908 | 16.570 | 1.00 | 0.00 | C |
| ATOM | 1047 | O    | GLY | 68 | 9.475  | 13.235 | 17.746 | 1.00 | 0.00 | O |
| ATOM | 1048 | H    | GLY | 68 | 10.544 | 10.961 | 14.434 | 1.00 | 0.00 | H |
| ATOM | 1049 | HA2  | GLY | 68 | 11.266 | 11.946 | 16.415 | 1.00 | 0.00 | H |
| ATOM | 1050 | HA3  | GLY | 68 | 11.189 | 13.552 | 15.660 | 1.00 | 0.00 | H |
| ATOM | 1051 | N    | ARG | 69 | 8.185  | 12.784 | 15.959 | 1.00 | 0.00 | N |
| ATOM | 1052 | CA   | ARG | 69 | 6.879  | 12.912 | 16.640 | 1.00 | 0.00 | C |
| ATOM | 1053 | C    | ARG | 69 | 6.304  | 11.552 | 17.061 | 1.00 | 0.00 | C |
| ATOM | 1054 | O    | ARG | 69 | 5.784  | 11.393 | 18.164 | 1.00 | 0.00 | O |
| ATOM | 1055 | CB   | ARG | 69 | 5.850  | 13.593 | 15.722 | 1.00 | 0.00 | C |
| ATOM | 1056 | CG   | ARG | 69 | 6.238  | 15.013 | 15.301 | 1.00 | 0.00 | C |
| ATOM | 1057 | CD   | ARG | 69 | 5.045  | 15.749 | 14.675 | 1.00 | 0.00 | C |
| ATOM | 1058 | NE   | ARG | 69 | 4.641  | 15.196 | 13.363 | 1.00 | 0.00 | N |
| ATOM | 1059 | CZ   | ARG | 69 | 3.434  | 14.743 | 13.030 | 1.00 | 0.00 | C |
| ATOM | 1060 | NH1  | ARG | 69 | 2.449  | 14.630 | 13.886 | 1.00 | 0.00 | N |
| ATOM | 1061 | NH2  | ARG | 69 | 3.168  | 14.406 | 11.792 | 1.00 | 0.00 | N |
| ATOM | 1062 | H    | ARG | 69 | 8.183  | 12.548 | 14.978 | 1.00 | 0.00 | H |
| ATOM | 1063 | HA   | ARG | 69 | 6.997  | 13.518 | 17.540 | 1.00 | 0.00 | H |
| ATOM | 1064 | HB2  | ARG | 69 | 5.683  | 12.988 | 14.831 | 1.00 | 0.00 | H |
| ATOM | 1065 | HB3  | ARG | 69 | 4.909  | 13.647 | 16.269 | 1.00 | 0.00 | H |
| ATOM | 1066 | HG2  | ARG | 69 | 6.549  | 15.569 | 16.186 | 1.00 | 0.00 | H |
| ATOM | 1067 | HG3  | ARG | 69 | 7.065  | 14.985 | 14.594 | 1.00 | 0.00 | H |
| ATOM | 1068 | HD2  | ARG | 69 | 4.211  | 15.729 | 15.379 | 1.00 | 0.00 | H |
| ATOM | 1069 | HD3  | ARG | 69 | 5.330  | 16.791 | 14.543 | 1.00 | 0.00 | H |
| ATOM | 1070 | HE   | ARG | 69 | 5.335  | 15.176 | 12.631 | 1.00 | 0.00 | H |
| ATOM | 1071 | HH11 | ARG | 69 | 2.508  | 14.947 | 14.843 | 1.00 | 0.00 | H |
| ATOM | 1072 | HH12 | ARG | 69 | 1.542  | 14.324 | 13.528 | 1.00 | 0.00 | H |
| ATOM | 1073 | HH21 | ARG | 69 | 3.870  | 14.474 | 11.064 | 1.00 | 0.00 | H |
| ATOM | 1074 | HH22 | ARG | 69 | 2.259  | 13.995 | 11.557 | 1.00 | 0.00 | H |
| ATOM | 1075 | N    | PHE | 70 | 6.362  | 10.580 | 16.147 | 1.00 | 0.00 | N |
| ATOM | 1076 | CA   | PHE | 70 | 5.869  | 9.220  | 16.360 | 1.00 | 0.00 | C |
| ATOM | 1077 | C    | PHE | 70 | 7.033  | 8.307  | 16.764 | 1.00 | 0.00 | C |
| ATOM | 1078 | O    | PHE | 70 | 8.161  | 8.495  | 16.301 | 1.00 | 0.00 | O |
| ATOM | 1079 | CB   | PHE | 70 | 5.199  | 8.700  | 15.078 | 1.00 | 0.00 | C |

|      |      |      |     |    |       |        |        |      |      |   |
|------|------|------|-----|----|-------|--------|--------|------|------|---|
| ATOM | 1080 | CG   | PHE | 70 | 3.881 | 9.319  | 14.627 | 1.00 | 0.00 | C |
| ATOM | 1081 | CD1  | PHE | 70 | 3.376 | 10.538 | 15.132 | 1.00 | 0.00 | C |
| ATOM | 1082 | CD2  | PHE | 70 | 3.143 | 8.635  | 13.643 | 1.00 | 0.00 | C |
| ATOM | 1083 | CE1  | PHE | 70 | 2.164 | 11.063 | 14.645 | 1.00 | 0.00 | C |
| ATOM | 1084 | CE2  | PHE | 70 | 1.929 | 9.152  | 13.165 | 1.00 | 0.00 | C |
| ATOM | 1085 | CZ   | PHE | 70 | 1.439 | 10.369 | 13.663 | 1.00 | 0.00 | C |
| ATOM | 1086 | H    | PHE | 70 | 6.803 | 10.781 | 15.264 | 1.00 | 0.00 | H |
| ATOM | 1087 | HA   | PHE | 70 | 5.135 | 9.210  | 17.169 | 1.00 | 0.00 | H |
| ATOM | 1088 | HB2  | PHE | 70 | 5.915 | 8.788  | 14.257 | 1.00 | 0.00 | H |
| ATOM | 1089 | HB3  | PHE | 70 | 5.015 | 7.633  | 15.222 | 1.00 | 0.00 | H |
| ATOM | 1090 | HD1  | PHE | 70 | 3.895 | 11.090 | 15.895 | 1.00 | 0.00 | H |
| ATOM | 1091 | HD2  | PHE | 70 | 3.515 | 7.701  | 13.249 | 1.00 | 0.00 | H |
| ATOM | 1092 | HE1  | PHE | 70 | 1.788 | 11.998 | 15.033 | 1.00 | 0.00 | H |
| ATOM | 1093 | HE2  | PHE | 70 | 1.368 | 8.612  | 12.417 | 1.00 | 0.00 | H |
| ATOM | 1094 | HZ   | PHE | 70 | 0.499 | 10.763 | 13.303 | 1.00 | 0.00 | H |
| ATOM | 1095 | N    | THR | 71 | 6.714 | 7.295  | 17.575 | 1.00 | 0.00 | N |
| ATOM | 1096 | CA   | THR | 71 | 7.606 | 6.287  | 18.171 | 1.00 | 0.00 | C |
| ATOM | 1097 | C    | THR | 71 | 7.085 | 4.905  | 17.781 | 1.00 | 0.00 | C |
| ATOM | 1098 | O    | THR | 71 | 5.874 | 4.719  | 17.664 | 1.00 | 0.00 | O |
| ATOM | 1099 | CB   | THR | 71 | 7.597 | 6.468  | 19.697 | 1.00 | 0.00 | C |
| ATOM | 1100 | CG2  | THR | 71 | 8.483 | 5.474  | 20.450 | 1.00 | 0.00 | C |
| ATOM | 1101 | OG1  | THR | 71 | 8.091 | 7.750  | 19.982 | 1.00 | 0.00 | O |
| ATOM | 1102 | H    | THR | 71 | 5.732 | 7.209  | 17.820 | 1.00 | 0.00 | H |
| ATOM | 1103 | HA   | THR | 71 | 8.622 | 6.429  | 17.810 | 1.00 | 0.00 | H |
| ATOM | 1104 | HB   | THR | 71 | 6.575 | 6.394  | 20.069 | 1.00 | 0.00 | H |
| ATOM | 1105 | HG1  | THR | 71 | 7.745 | 8.027  | 20.836 | 1.00 | 0.00 | H |
| ATOM | 1106 | HG21 | THR | 71 | 9.501 | 5.522  | 20.065 | 1.00 | 0.00 | H |
| ATOM | 1107 | HG22 | THR | 71 | 8.495 | 5.730  | 21.510 | 1.00 | 0.00 | H |
| ATOM | 1108 | HG23 | THR | 71 | 8.097 | 4.460  | 20.346 | 1.00 | 0.00 | H |
| ATOM | 1109 | N    | ILE | 72 | 7.953 | 3.912  | 17.594 | 1.00 | 0.00 | N |
| ATOM | 1110 | CA   | ILE | 72 | 7.534 | 2.545  | 17.227 | 1.00 | 0.00 | C |
| ATOM | 1111 | C    | ILE | 72 | 8.306 | 1.515  | 18.055 | 1.00 | 0.00 | C |
| ATOM | 1112 | O    | ILE | 72 | 9.501 | 1.664  | 18.306 | 1.00 | 0.00 | O |
| ATOM | 1113 | CB   | ILE | 72 | 7.622 | 2.324  | 15.693 | 1.00 | 0.00 | C |
| ATOM | 1114 | CG1  | ILE | 72 | 7.006 | 0.964  | 15.276 | 1.00 | 0.00 | C |
| ATOM | 1115 | CG2  | ILE | 72 | 9.060 | 2.462  | 15.168 | 1.00 | 0.00 | C |
| ATOM | 1116 | CD1  | ILE | 72 | 6.897 | 0.736  | 13.762 | 1.00 | 0.00 | C |
| ATOM | 1117 | H    | ILE | 72 | 8.927 | 4.046  | 17.830 | 1.00 | 0.00 | H |
| ATOM | 1118 | HA   | ILE | 72 | 6.488 | 2.421  | 17.505 | 1.00 | 0.00 | H |
| ATOM | 1119 | HB   | ILE | 72 | 7.025 | 3.107  | 15.221 | 1.00 | 0.00 | H |
| ATOM | 1120 | HG12 | ILE | 72 | 7.591 | 0.148  | 15.705 | 1.00 | 0.00 | H |
| ATOM | 1121 | HG13 | ILE | 72 | 5.997 | 0.907  | 15.678 | 1.00 | 0.00 | H |
| ATOM | 1122 | HG21 | ILE | 72 | 9.668 | 1.649  | 15.556 | 1.00 | 0.00 | H |
| ATOM | 1123 | HG22 | ILE | 72 | 9.075 | 2.433  | 14.080 | 1.00 | 0.00 | H |
| ATOM | 1124 | HG23 | ILE | 72 | 9.489 | 3.412  | 15.479 | 1.00 | 0.00 | H |
| ATOM | 1125 | HD11 | ILE | 72 | 7.886 | 0.671  | 13.312 | 1.00 | 0.00 | H |
| ATOM | 1126 | HD12 | ILE | 72 | 6.377 | -0.205 | 13.579 | 1.00 | 0.00 | H |
| ATOM | 1127 | HD13 | ILE | 72 | 6.338 | 1.549  | 13.301 | 1.00 | 0.00 | H |
| ATOM | 1128 | N    | SER | 73 | 7.615 | 0.468  | 18.490 | 1.00 | 0.00 | N |
| ATOM | 1129 | CA   | SER | 73 | 8.205 | -0.638 | 19.246 | 1.00 | 0.00 | C |
| ATOM | 1130 | C    | SER | 73 | 7.464 | -1.950 | 18.954 | 1.00 | 0.00 | C |
| ATOM | 1131 | O    | SER | 73 | 6.396 | -1.943 | 18.337 | 1.00 | 0.00 | O |
| ATOM | 1132 | CB   | SER | 73 | 8.301 | -0.321 | 20.748 | 1.00 | 0.00 | C |
| ATOM | 1133 | OG   | SER | 73 | 7.045 | -0.129 | 21.395 | 1.00 | 0.00 | O |
| ATOM | 1134 | H    | SER | 73 | 6.647 | 0.349  | 18.204 | 1.00 | 0.00 | H |
| ATOM | 1135 | HA   | SER | 73 | 9.228 | -0.772 | 18.902 | 1.00 | 0.00 | H |
| ATOM | 1136 | HB2  | SER | 73 | 8.832 | -1.137 | 21.243 | 1.00 | 0.00 | H |

|      |      |      |     |    |        |         |        |      |      |   |
|------|------|------|-----|----|--------|---------|--------|------|------|---|
| ATOM | 1137 | HB3  | SER | 73 | 8.901  | 0.582   | 20.873 | 1.00 | 0.00 | H |
| ATOM | 1138 | HG   | SER | 73 | 7.237  | 0.036   | 22.323 | 1.00 | 0.00 | H |
| ATOM | 1139 | N    | ARG | 74 | 8.049  | -3.085  | 19.354 | 1.00 | 0.00 | N |
| ATOM | 1140 | CA   | ARG | 74 | 7.547  | -4.432  | 19.056 | 1.00 | 0.00 | C |
| ATOM | 1141 | C    | ARG | 74 | 7.927  | -5.417  | 20.154 | 1.00 | 0.00 | C |
| ATOM | 1142 | O    | ARG | 74 | 8.922  | -5.218  | 20.853 | 1.00 | 0.00 | O |
| ATOM | 1143 | CB   | ARG | 74 | 8.071  | -4.932  | 17.697 | 1.00 | 0.00 | C |
| ATOM | 1144 | CG   | ARG | 74 | 9.595  | -5.143  | 17.641 | 1.00 | 0.00 | C |
| ATOM | 1145 | CD   | ARG | 74 | 10.051 | -5.648  | 16.266 | 1.00 | 0.00 | C |
| ATOM | 1146 | NE   | ARG | 74 | 10.043 | -7.119  | 16.182 | 1.00 | 0.00 | N |
| ATOM | 1147 | CZ   | ARG | 74 | 9.995  | -7.845  | 15.071 | 1.00 | 0.00 | C |
| ATOM | 1148 | NH1  | ARG | 74 | 9.872  | -7.304  | 13.875 | 1.00 | 0.00 | N |
| ATOM | 1149 | NH2  | ARG | 74 | 10.082 | -9.147  | 15.158 | 1.00 | 0.00 | N |
| ATOM | 1150 | H    | ARG | 74 | 8.902  | -3.042  | 19.895 | 1.00 | 0.00 | H |
| ATOM | 1151 | HA   | ARG | 74 | 6.458  | -4.395  | 19.008 | 1.00 | 0.00 | H |
| ATOM | 1152 | HB2  | ARG | 74 | 7.586  | -5.881  | 17.474 | 1.00 | 0.00 | H |
| ATOM | 1153 | HB3  | ARG | 74 | 7.784  | -4.212  | 16.929 | 1.00 | 0.00 | H |
| ATOM | 1154 | HG2  | ARG | 74 | 10.093 | -4.197  | 17.845 | 1.00 | 0.00 | H |
| ATOM | 1155 | HG3  | ARG | 74 | 9.905  | -5.857  | 18.403 | 1.00 | 0.00 | H |
| ATOM | 1156 | HD2  | ARG | 74 | 9.414  | -5.211  | 15.496 | 1.00 | 0.00 | H |
| ATOM | 1157 | HD3  | ARG | 74 | 11.072 | -5.307  | 16.094 | 1.00 | 0.00 | H |
| ATOM | 1158 | HE   | ARG | 74 | 10.130 | -7.636  | 17.059 | 1.00 | 0.00 | H |
| ATOM | 1159 | HH11 | ARG | 74 | 9.819  | -6.306  | 13.779 | 1.00 | 0.00 | H |
| ATOM | 1160 | HH12 | ARG | 74 | 9.933  | -7.890  | 13.048 | 1.00 | 0.00 | H |
| ATOM | 1161 | HH21 | ARG | 74 | 10.297 | -9.601  | 16.046 | 1.00 | 0.00 | H |
| ATOM | 1162 | HH22 | ARG | 74 | 9.893  | -9.732  | 14.353 | 1.00 | 0.00 | H |
| ATOM | 1163 | N    | ASP | 75 | 7.133  | -6.472  | 20.285 | 1.00 | 0.00 | N |
| ATOM | 1164 | CA   | ASP | 75 | 7.291  | -7.494  | 21.310 | 1.00 | 0.00 | C |
| ATOM | 1165 | C    | ASP | 75 | 7.331  | -8.897  | 20.679 | 1.00 | 0.00 | C |
| ATOM | 1166 | O    | ASP | 75 | 6.309  | -9.477  | 20.299 | 1.00 | 0.00 | O |
| ATOM | 1167 | CB   | ASP | 75 | 6.178  | -7.317  | 22.356 | 1.00 | 0.00 | C |
| ATOM | 1168 | CG   | ASP | 75 | 6.397  | -8.175  | 23.603 | 1.00 | 0.00 | C |
| ATOM | 1169 | OD1  | ASP | 75 | 6.901  | -9.314  | 23.460 | 1.00 | 0.00 | O |
| ATOM | 1170 | OD2  | ASP | 75 | 6.023  | -7.716  | 24.704 | 1.00 | 0.00 | O |
| ATOM | 1171 | H    | ASP | 75 | 6.315  | -6.529  | 19.680 | 1.00 | 0.00 | H |
| ATOM | 1172 | HA   | ASP | 75 | 8.236  | -7.336  | 21.832 | 1.00 | 0.00 | H |
| ATOM | 1173 | HB2  | ASP | 75 | 6.157  | -6.269  | 22.663 | 1.00 | 0.00 | H |
| ATOM | 1174 | HB3  | ASP | 75 | 5.211  | -7.549  | 21.907 | 1.00 | 0.00 | H |
| ATOM | 1175 | N    | ASP | 76 | 8.549  | -9.441  | 20.599 | 1.00 | 0.00 | N |
| ATOM | 1176 | CA   | ASP | 76 | 8.878  | -10.772 | 20.073 | 1.00 | 0.00 | C |
| ATOM | 1177 | C    | ASP | 76 | 8.513  | -11.934 | 21.020 | 1.00 | 0.00 | C |
| ATOM | 1178 | O    | ASP | 76 | 8.788  | -13.089 | 20.706 | 1.00 | 0.00 | O |
| ATOM | 1179 | CB   | ASP | 76 | 10.368 | -10.804 | 19.692 | 1.00 | 0.00 | C |
| ATOM | 1180 | CG   | ASP | 76 | 10.654 | -9.969  | 18.445 | 1.00 | 0.00 | C |
| ATOM | 1181 | OD1  | ASP | 76 | 10.927 | -10.552 | 17.378 | 1.00 | 0.00 | O |
| ATOM | 1182 | OD2  | ASP | 76 | 10.648 | -8.720  | 18.533 | 1.00 | 0.00 | O |
| ATOM | 1183 | H    | ASP | 76 | 9.326  | -8.838  | 20.831 | 1.00 | 0.00 | H |
| ATOM | 1184 | HA   | ASP | 76 | 8.285  | -10.935 | 19.176 | 1.00 | 0.00 | H |
| ATOM | 1185 | HB2  | ASP | 76 | 10.971 | -10.443 | 20.527 | 1.00 | 0.00 | H |
| ATOM | 1186 | HB3  | ASP | 76 | 10.671 | -11.832 | 19.485 | 1.00 | 0.00 | H |
| ATOM | 1187 | N    | SER | 77 | 7.898  | -11.649 | 22.170 | 1.00 | 0.00 | N |
| ATOM | 1188 | CA   | SER | 77 | 7.203  | -12.656 | 22.986 | 1.00 | 0.00 | C |
| ATOM | 1189 | C    | SER | 77 | 5.686  | -12.669 | 22.740 | 1.00 | 0.00 | C |
| ATOM | 1190 | O    | SER | 77 | 5.056  | -13.712 | 22.891 | 1.00 | 0.00 | O |
| ATOM | 1191 | CB   | SER | 77 | 7.506  | -12.435 | 24.480 | 1.00 | 0.00 | C |
| ATOM | 1192 | OG   | SER | 77 | 6.845  | -11.318 | 25.049 | 1.00 | 0.00 | O |
| ATOM | 1193 | H    | SER | 77 | 7.715  | -10.667 | 22.386 | 1.00 | 0.00 | H |

|      |      |     |     |    |       |         |        |      |      |   |
|------|------|-----|-----|----|-------|---------|--------|------|------|---|
| ATOM | 1194 | HA  | SER | 77 | 7.562 | -13.652 | 22.727 | 1.00 | 0.00 | H |
| ATOM | 1195 | HB2 | SER | 77 | 7.194 | -13.328 | 25.023 | 1.00 | 0.00 | H |
| ATOM | 1196 | HB3 | SER | 77 | 8.581 | -12.317 | 24.612 | 1.00 | 0.00 | H |
| ATOM | 1197 | HG  | SER | 77 | 6.938 | -10.526 | 24.462 | 1.00 | 0.00 | H |
| ATOM | 1198 | N   | LYS | 78 | 5.091 | -11.537 | 22.336 | 1.00 | 0.00 | N |
| ATOM | 1199 | CA  | LYS | 78 | 3.645 | -11.412 | 22.091 | 1.00 | 0.00 | C |
| ATOM | 1200 | C   | LYS | 78 | 3.238 | -11.567 | 20.618 | 1.00 | 0.00 | C |
| ATOM | 1201 | O   | LYS | 78 | 2.041 | -11.611 | 20.333 | 1.00 | 0.00 | O |
| ATOM | 1202 | CB  | LYS | 78 | 3.180 | -10.026 | 22.568 | 1.00 | 0.00 | C |
| ATOM | 1203 | CG  | LYS | 78 | 3.330 | -9.812  | 24.075 | 1.00 | 0.00 | C |
| ATOM | 1204 | CD  | LYS | 78 | 2.874 | -8.393  | 24.445 | 1.00 | 0.00 | C |
| ATOM | 1205 | CE  | LYS | 78 | 3.227 | -8.038  | 25.895 | 1.00 | 0.00 | C |
| ATOM | 1206 | NZ  | LYS | 78 | 2.658 | -9.006  | 26.859 | 1.00 | 0.00 | N |
| ATOM | 1207 | H   | LYS | 78 | 5.658 | -10.698 | 22.283 | 1.00 | 0.00 | H |
| ATOM | 1208 | HA  | LYS | 78 | 3.107 | -12.184 | 22.642 | 1.00 | 0.00 | H |
| ATOM | 1209 | HB2 | LYS | 78 | 3.750 | -9.267  | 22.035 | 1.00 | 0.00 | H |
| ATOM | 1210 | HB3 | LYS | 78 | 2.127 | -9.896  | 22.313 | 1.00 | 0.00 | H |
| ATOM | 1211 | HG2 | LYS | 78 | 2.717 | -10.547 | 24.602 | 1.00 | 0.00 | H |
| ATOM | 1212 | HG3 | LYS | 78 | 4.369 | -9.947  | 24.370 | 1.00 | 0.00 | H |
| ATOM | 1213 | HD2 | LYS | 78 | 3.381 | -7.676  | 23.796 | 1.00 | 0.00 | H |
| ATOM | 1214 | HD3 | LYS | 78 | 1.800 | -8.298  | 24.282 | 1.00 | 0.00 | H |
| ATOM | 1215 | HE2 | LYS | 78 | 4.318 | -8.037  | 25.987 | 1.00 | 0.00 | H |
| ATOM | 1216 | HE3 | LYS | 78 | 2.875 | -7.025  | 26.103 | 1.00 | 0.00 | H |
| ATOM | 1217 | HZ1 | LYS | 78 | 3.030 | -9.924  | 26.650 | 1.00 | 0.00 | H |
| ATOM | 1218 | HZ2 | LYS | 78 | 2.925 | -8.758  | 27.802 | 1.00 | 0.00 | H |
| ATOM | 1219 | HZ3 | LYS | 78 | 1.649 | -9.032  | 26.783 | 1.00 | 0.00 | H |
| ATOM | 1220 | N   | SER | 79 | 4.197 | -11.536 | 19.687 | 1.00 | 0.00 | N |
| ATOM | 1221 | CA  | SER | 79 | 3.942 | -11.308 | 18.256 | 1.00 | 0.00 | C |
| ATOM | 1222 | C   | SER | 79 | 3.056 | -10.069 | 18.029 | 1.00 | 0.00 | C |
| ATOM | 1223 | O   | SER | 79 | 2.078 | -10.098 | 17.287 | 1.00 | 0.00 | O |
| ATOM | 1224 | CB  | SER | 79 | 3.385 | -12.566 | 17.568 | 1.00 | 0.00 | C |
| ATOM | 1225 | OG  | SER | 79 | 4.346 | -13.607 | 17.593 | 1.00 | 0.00 | O |
| ATOM | 1226 | H   | SER | 79 | 5.149 | -11.478 | 20.016 | 1.00 | 0.00 | H |
| ATOM | 1227 | HA  | SER | 79 | 4.892 | -11.083 | 17.783 | 1.00 | 0.00 | H |
| ATOM | 1228 | HB2 | SER | 79 | 2.469 | -12.889 | 18.067 | 1.00 | 0.00 | H |
| ATOM | 1229 | HB3 | SER | 79 | 3.150 | -12.336 | 16.528 | 1.00 | 0.00 | H |
| ATOM | 1230 | HG  | SER | 79 | 3.910 | -14.408 | 17.287 | 1.00 | 0.00 | H |
| ATOM | 1231 | N   | SER | 80 | 3.349 | -8.966  | 18.722 | 1.00 | 0.00 | N |
| ATOM | 1232 | CA  | SER | 80 | 2.580 | -7.719  | 18.643 | 1.00 | 0.00 | C |
| ATOM | 1233 | C   | SER | 80 | 3.484 | -6.528  | 18.328 | 1.00 | 0.00 | C |
| ATOM | 1234 | O   | SER | 80 | 4.598 | -6.444  | 18.846 | 1.00 | 0.00 | O |
| ATOM | 1235 | CB  | SER | 80 | 1.876 | -7.456  | 19.972 | 1.00 | 0.00 | C |
| ATOM | 1236 | OG  | SER | 80 | 0.837 | -8.389  | 20.188 | 1.00 | 0.00 | O |
| ATOM | 1237 | H   | SER | 80 | 4.196 | -8.958  | 19.281 | 1.00 | 0.00 | H |
| ATOM | 1238 | HA  | SER | 80 | 1.820 | -7.793  | 17.865 | 1.00 | 0.00 | H |
| ATOM | 1239 | HB2 | SER | 80 | 2.602 | -7.517  | 20.786 | 1.00 | 0.00 | H |
| ATOM | 1240 | HB3 | SER | 80 | 1.446 | -6.453  | 19.967 | 1.00 | 0.00 | H |
| ATOM | 1241 | HG  | SER | 80 | 1.149 | -9.267  | 19.926 | 1.00 | 0.00 | H |
| ATOM | 1242 | N   | VAL | 81 | 2.989 | -5.581  | 17.525 | 1.00 | 0.00 | N |
| ATOM | 1243 | CA  | VAL | 81 | 3.695 | -4.328  | 17.199 | 1.00 | 0.00 | C |
| ATOM | 1244 | C   | VAL | 81 | 2.872 | -3.114  | 17.586 | 1.00 | 0.00 | C |
| ATOM | 1245 | O   | VAL | 81 | 1.639 | -3.155  | 17.576 | 1.00 | 0.00 | O |
| ATOM | 1246 | CB  | VAL | 81 | 4.077 | -4.190  | 15.714 | 1.00 | 0.00 | C |
| ATOM | 1247 | CG1 | VAL | 81 | 5.082 | -5.260  | 15.304 | 1.00 | 0.00 | C |
| ATOM | 1248 | CG2 | VAL | 81 | 2.880 | -4.220  | 14.749 | 1.00 | 0.00 | C |
| ATOM | 1249 | H   | VAL | 81 | 2.017 | -5.685  | 17.219 | 1.00 | 0.00 | H |
| ATOM | 1250 | HA  | VAL | 81 | 4.621 | -4.284  | 17.772 | 1.00 | 0.00 | H |

|      |      |      |     |    |       |        |        |      |      |   |
|------|------|------|-----|----|-------|--------|--------|------|------|---|
| ATOM | 1251 | HB   | VAL | 81 | 4.567 | -3.223 | 15.584 | 1.00 | 0.00 | H |
| ATOM | 1252 | HG11 | VAL | 81 | 4.605 | -6.236 | 15.286 | 1.00 | 0.00 | H |
| ATOM | 1253 | HG12 | VAL | 81 | 5.461 | -5.017 | 14.318 | 1.00 | 0.00 | H |
| ATOM | 1254 | HG13 | VAL | 81 | 5.917 | -5.272 | 15.999 | 1.00 | 0.00 | H |
| ATOM | 1255 | HG21 | VAL | 81 | 2.200 | -3.399 | 14.967 | 1.00 | 0.00 | H |
| ATOM | 1256 | HG22 | VAL | 81 | 3.230 | -4.101 | 13.724 | 1.00 | 0.00 | H |
| ATOM | 1257 | HG23 | VAL | 81 | 2.349 | -5.169 | 14.833 | 1.00 | 0.00 | H |
| ATOM | 1258 | N    | TYR | 82 | 3.565 | -2.015 | 17.886 | 1.00 | 0.00 | N |
| ATOM | 1259 | CA   | TYR | 82 | 2.973 | -0.817 | 18.460 | 1.00 | 0.00 | C |
| ATOM | 1260 | C    | TYR | 82 | 3.436 | 0.450  | 17.735 | 1.00 | 0.00 | C |
| ATOM | 1261 | O    | TYR | 82 | 4.620 | 0.797  | 17.764 | 1.00 | 0.00 | O |
| ATOM | 1262 | CB   | TYR | 82 | 3.365 | -0.764 | 19.942 | 1.00 | 0.00 | C |
| ATOM | 1263 | CG   | TYR | 82 | 2.951 | -1.992 | 20.733 | 1.00 | 0.00 | C |
| ATOM | 1264 | CD1  | TYR | 82 | 1.599 | -2.185 | 21.076 | 1.00 | 0.00 | C |
| ATOM | 1265 | CD2  | TYR | 82 | 3.906 | -2.971 | 21.077 | 1.00 | 0.00 | C |
| ATOM | 1266 | CE1  | TYR | 82 | 1.199 | -3.354 | 21.751 | 1.00 | 0.00 | C |
| ATOM | 1267 | CE2  | TYR | 82 | 3.514 | -4.138 | 21.763 | 1.00 | 0.00 | C |
| ATOM | 1268 | CZ   | TYR | 82 | 2.155 | -4.336 | 22.096 | 1.00 | 0.00 | C |
| ATOM | 1269 | OH   | TYR | 82 | 1.769 | -5.475 | 22.732 | 1.00 | 0.00 | O |
| ATOM | 1270 | H    | TYR | 82 | 4.582 | -2.071 | 17.884 | 1.00 | 0.00 | H |
| ATOM | 1271 | HA   | TYR | 82 | 1.887 | -0.873 | 18.396 | 1.00 | 0.00 | H |
| ATOM | 1272 | HB2  | TYR | 82 | 4.444 | -0.637 | 20.024 | 1.00 | 0.00 | H |
| ATOM | 1273 | HB3  | TYR | 82 | 2.894 | 0.115  | 20.369 | 1.00 | 0.00 | H |
| ATOM | 1274 | HD1  | TYR | 82 | 0.856 | -1.457 | 20.777 | 1.00 | 0.00 | H |
| ATOM | 1275 | HD2  | TYR | 82 | 4.941 | -2.849 | 20.778 | 1.00 | 0.00 | H |
| ATOM | 1276 | HE1  | TYR | 82 | 0.154 | -3.506 | 21.981 | 1.00 | 0.00 | H |
| ATOM | 1277 | HE2  | TYR | 82 | 4.245 | -4.898 | 22.003 | 1.00 | 0.00 | H |
| ATOM | 1278 | HH   | TYR | 82 | 0.814 | -5.557 | 22.790 | 1.00 | 0.00 | H |
| ATOM | 1279 | N    | LEU | 83 | 2.486 | 1.184  | 17.142 | 1.00 | 0.00 | N |
| ATOM | 1280 | CA   | LEU | 83 | 2.728 | 2.527  | 16.603 | 1.00 | 0.00 | C |
| ATOM | 1281 | C    | LEU | 83 | 2.223 | 3.556  | 17.618 | 1.00 | 0.00 | C |
| ATOM | 1282 | O    | LEU | 83 | 1.029 | 3.623  | 17.908 | 1.00 | 0.00 | O |
| ATOM | 1283 | CB   | LEU | 83 | 2.052 | 2.704  | 15.225 | 1.00 | 0.00 | C |
| ATOM | 1284 | CG   | LEU | 83 | 2.874 | 3.532  | 14.216 | 1.00 | 0.00 | C |
| ATOM | 1285 | CD1  | LEU | 83 | 1.982 | 3.873  | 13.015 | 1.00 | 0.00 | C |
| ATOM | 1286 | CD2  | LEU | 83 | 3.458 | 4.838  | 14.780 | 1.00 | 0.00 | C |
| ATOM | 1287 | H    | LEU | 83 | 1.521 | 0.870  | 17.215 | 1.00 | 0.00 | H |
| ATOM | 1288 | HA   | LEU | 83 | 3.803 | 2.665  | 16.475 | 1.00 | 0.00 | H |
| ATOM | 1289 | HB2  | LEU | 83 | 1.876 | 1.723  | 14.781 | 1.00 | 0.00 | H |
| ATOM | 1290 | HB3  | LEU | 83 | 1.082 | 3.181  | 15.360 | 1.00 | 0.00 | H |
| ATOM | 1291 | HG   | LEU | 83 | 3.702 | 2.915  | 13.864 | 1.00 | 0.00 | H |
| ATOM | 1292 | HD11 | LEU | 83 | 1.252 | 4.636  | 13.291 | 1.00 | 0.00 | H |
| ATOM | 1293 | HD12 | LEU | 83 | 2.599 | 4.240  | 12.197 | 1.00 | 0.00 | H |
| ATOM | 1294 | HD13 | LEU | 83 | 1.448 | 2.986  | 12.678 | 1.00 | 0.00 | H |
| ATOM | 1295 | HD21 | LEU | 83 | 4.225 | 4.624  | 15.523 | 1.00 | 0.00 | H |
| ATOM | 1296 | HD22 | LEU | 83 | 3.924 | 5.407  | 13.976 | 1.00 | 0.00 | H |
| ATOM | 1297 | HD23 | LEU | 83 | 2.669 | 5.436  | 15.236 | 1.00 | 0.00 | H |
| ATOM | 1298 | N    | GLN | 84 | 3.123 | 4.340  | 18.198 | 1.00 | 0.00 | N |
| ATOM | 1299 | CA   | GLN | 84 | 2.791 | 5.281  | 19.256 | 1.00 | 0.00 | C |
| ATOM | 1300 | C    | GLN | 84 | 2.897 | 6.691  | 18.673 | 1.00 | 0.00 | C |
| ATOM | 1301 | O    | GLN | 84 | 3.969 | 7.128  | 18.265 | 1.00 | 0.00 | O |
| ATOM | 1302 | CB   | GLN | 84 | 3.709 | 4.974  | 20.451 | 1.00 | 0.00 | C |
| ATOM | 1303 | CG   | GLN | 84 | 3.201 | 5.535  | 21.783 | 1.00 | 0.00 | C |
| ATOM | 1304 | CD   | GLN | 84 | 3.355 | 7.045  | 21.872 | 1.00 | 0.00 | C |
| ATOM | 1305 | NE2  | GLN | 84 | 2.279 | 7.791  | 21.743 | 1.00 | 0.00 | N |
| ATOM | 1306 | OE1  | GLN | 84 | 4.449 | 7.556  | 22.051 | 1.00 | 0.00 | O |
| ATOM | 1307 | H    | GLN | 84 | 4.088 | 4.329  | 17.874 | 1.00 | 0.00 | H |



|      |      |      |     |    |        |        |        |      |      |   |
|------|------|------|-----|----|--------|--------|--------|------|------|---|
| ATOM | 1308 | HA   | GLN | 84 | 1.761  | 5.135  | 19.577 | 1.00 | 0.00 | H |
| ATOM | 1309 | HB2  | GLN | 84 | 3.770  | 3.891  | 20.566 | 1.00 | 0.00 | H |
| ATOM | 1310 | HB3  | GLN | 84 | 4.712  | 5.342  | 20.250 | 1.00 | 0.00 | H |
| ATOM | 1311 | HG2  | GLN | 84 | 2.157  | 5.256  | 21.926 | 1.00 | 0.00 | H |
| ATOM | 1312 | HG3  | GLN | 84 | 3.781  | 5.090  | 22.592 | 1.00 | 0.00 | H |
| ATOM | 1313 | HE21 | GLN | 84 | 2.421  | 8.795  | 21.804 | 1.00 | 0.00 | H |
| ATOM | 1314 | HE22 | GLN | 84 | 1.374  | 7.409  | 21.508 | 1.00 | 0.00 | H |
| ATOM | 1315 | N    | MET | 85 | 1.756  | 7.371  | 18.564 | 1.00 | 0.00 | N |
| ATOM | 1316 | CA   | MET | 85 | 1.626  | 8.640  | 17.852 | 1.00 | 0.00 | C |
| ATOM | 1317 | C    | MET | 85 | 1.514  | 9.780  | 18.860 | 1.00 | 0.00 | C |
| ATOM | 1318 | O    | MET | 85 | 0.745  | 9.673  | 19.814 | 1.00 | 0.00 | O |
| ATOM | 1319 | CB   | MET | 85 | 0.386  | 8.602  | 16.945 | 1.00 | 0.00 | C |
| ATOM | 1320 | CG   | MET | 85 | 0.407  | 7.397  | 15.993 | 1.00 | 0.00 | C |
| ATOM | 1321 | SD   | MET | 85 | -0.901 | 7.377  | 14.742 | 1.00 | 0.00 | S |
| ATOM | 1322 | CE   | MET | 85 | -2.374 | 7.302  | 15.795 | 1.00 | 0.00 | C |
| ATOM | 1323 | H    | MET | 85 | 0.923  | 7.020  | 19.021 | 1.00 | 0.00 | H |
| ATOM | 1324 | HA   | MET | 85 | 2.503  | 8.806  | 17.229 | 1.00 | 0.00 | H |
| ATOM | 1325 | HB2  | MET | 85 | -0.515 | 8.564  | 17.559 | 1.00 | 0.00 | H |
| ATOM | 1326 | HB3  | MET | 85 | 0.366  | 9.517  | 16.354 | 1.00 | 0.00 | H |
| ATOM | 1327 | HG2  | MET | 85 | 1.362  | 7.397  | 15.467 | 1.00 | 0.00 | H |
| ATOM | 1328 | HG3  | MET | 85 | 0.345  | 6.473  | 16.569 | 1.00 | 0.00 | H |
| ATOM | 1329 | HE1  | MET | 85 | -2.509 | 8.251  | 16.313 | 1.00 | 0.00 | H |
| ATOM | 1330 | HE2  | MET | 85 | -3.248 | 7.121  | 15.172 | 1.00 | 0.00 | H |
| ATOM | 1331 | HE3  | MET | 85 | -2.279 | 6.497  | 16.518 | 1.00 | 0.00 | H |
| ATOM | 1332 | N    | ASN | 86 | 2.247  | 10.872 | 18.635 | 1.00 | 0.00 | N |
| ATOM | 1333 | CA   | ASN | 86 | 2.221  | 12.084 | 19.458 | 1.00 | 0.00 | C |
| ATOM | 1334 | C    | ASN | 86 | 2.227  | 13.332 | 18.586 | 1.00 | 0.00 | C |
| ATOM | 1335 | O    | ASN | 86 | 2.685  | 13.300 | 17.441 | 1.00 | 0.00 | O |
| ATOM | 1336 | CB   | ASN | 86 | 3.430  | 12.169 | 20.402 | 1.00 | 0.00 | C |
| ATOM | 1337 | CG   | ASN | 86 | 3.679  | 10.880 | 21.149 | 1.00 | 0.00 | C |
| ATOM | 1338 | ND2  | ASN | 86 | 4.645  | 10.099 | 20.711 | 1.00 | 0.00 | N |
| ATOM | 1339 | OD1  | ASN | 86 | 2.958  | 10.551 | 22.081 | 1.00 | 0.00 | O |
| ATOM | 1340 | H    | ASN | 86 | 2.833  | 10.895 | 17.816 | 1.00 | 0.00 | H |
| ATOM | 1341 | HA   | ASN | 86 | 1.309  | 12.094 | 20.052 | 1.00 | 0.00 | H |
| ATOM | 1342 | HB2  | ASN | 86 | 4.322  | 12.439 | 19.841 | 1.00 | 0.00 | H |
| ATOM | 1343 | HB3  | ASN | 86 | 3.263  | 12.960 | 21.134 | 1.00 | 0.00 | H |
| ATOM | 1344 | HD21 | ASN | 86 | 4.818  | 9.229  | 21.206 | 1.00 | 0.00 | H |
| ATOM | 1345 | HD22 | ASN | 86 | 5.208  | 10.383 | 19.919 | 1.00 | 0.00 | H |
| ATOM | 1346 | N    | ASN | 87 | 1.743  | 14.444 | 19.150 | 1.00 | 0.00 | N |
| ATOM | 1347 | CA   | ASN | 87 | 1.740  | 15.758 | 18.500 | 1.00 | 0.00 | C |
| ATOM | 1348 | C    | ASN | 87 | 0.945  | 15.675 | 17.183 | 1.00 | 0.00 | C |
| ATOM | 1349 | O    | ASN | 87 | 1.463  | 16.032 | 16.120 | 1.00 | 0.00 | O |
| ATOM | 1350 | CB   | ASN | 87 | 3.177  | 16.295 | 18.295 | 1.00 | 0.00 | C |
| ATOM | 1351 | CG   | ASN | 87 | 3.999  | 16.577 | 19.551 | 1.00 | 0.00 | C |
| ATOM | 1352 | ND2  | ASN | 87 | 3.541  | 16.261 | 20.749 | 1.00 | 0.00 | N |
| ATOM | 1353 | OD1  | ASN | 87 | 5.093  | 17.106 | 19.447 | 1.00 | 0.00 | O |
| ATOM | 1354 | H    | ASN | 87 | 1.279  | 14.355 | 20.046 | 1.00 | 0.00 | H |
| ATOM | 1355 | HA   | ASN | 87 | 1.216  | 16.460 | 19.142 | 1.00 | 0.00 | H |
| ATOM | 1356 | HB2  | ASN | 87 | 3.745  | 15.599 | 17.682 | 1.00 | 0.00 | H |
| ATOM | 1357 | HB3  | ASN | 87 | 3.111  | 17.238 | 17.748 | 1.00 | 0.00 | H |
| ATOM | 1358 | HD21 | ASN | 87 | 4.136  | 16.464 | 21.535 | 1.00 | 0.00 | H |
| ATOM | 1359 | HD22 | ASN | 87 | 2.631  | 15.852 | 20.872 | 1.00 | 0.00 | H |
| ATOM | 1360 | N    | LEU | 88 | -0.256 | 15.080 | 17.240 | 1.00 | 0.00 | N |
| ATOM | 1361 | CA   | LEU | 88 | -1.111 | 14.805 | 16.082 | 1.00 | 0.00 | C |
| ATOM | 1362 | C    | LEU | 88 | -1.600 | 16.081 | 15.392 | 1.00 | 0.00 | C |
| ATOM | 1363 | O    | LEU | 88 | -1.683 | 17.147 | 16.007 | 1.00 | 0.00 | O |
| ATOM | 1364 | CB   | LEU | 88 | -2.292 | 13.915 | 16.524 | 1.00 | 0.00 | C |

|      |      |      |     |    |        |        |        |      |      |   |
|------|------|------|-----|----|--------|--------|--------|------|------|---|
| ATOM | 1365 | CG   | LEU | 88 | -1.895 | 12.438 | 16.715 | 1.00 | 0.00 | C |
| ATOM | 1366 | CD1  | LEU | 88 | -3.007 | 11.685 | 17.448 | 1.00 | 0.00 | C |
| ATOM | 1367 | CD2  | LEU | 88 | -1.632 | 11.749 | 15.364 | 1.00 | 0.00 | C |
| ATOM | 1368 | H    | LEU | 88 | -0.597 | 14.781 | 18.148 | 1.00 | 0.00 | H |
| ATOM | 1369 | HA   | LEU | 88 | -0.522 | 14.274 | 15.336 | 1.00 | 0.00 | H |
| ATOM | 1370 | HB2  | LEU | 88 | -2.704 | 14.311 | 17.456 | 1.00 | 0.00 | H |
| ATOM | 1371 | HB3  | LEU | 88 | -3.087 | 13.964 | 15.776 | 1.00 | 0.00 | H |
| ATOM | 1372 | HG   | LEU | 88 | -0.991 | 12.380 | 17.323 | 1.00 | 0.00 | H |
| ATOM | 1373 | HD11 | LEU | 88 | -3.919 | 11.703 | 16.851 | 1.00 | 0.00 | H |
| ATOM | 1374 | HD12 | LEU | 88 | -2.708 | 10.651 | 17.618 | 1.00 | 0.00 | H |
| ATOM | 1375 | HD13 | LEU | 88 | -3.198 | 12.154 | 18.415 | 1.00 | 0.00 | H |
| ATOM | 1376 | HD21 | LEU | 88 | -0.767 | 12.191 | 14.873 | 1.00 | 0.00 | H |
| ATOM | 1377 | HD22 | LEU | 88 | -1.438 | 10.689 | 15.516 | 1.00 | 0.00 | H |
| ATOM | 1378 | HD23 | LEU | 88 | -2.501 | 11.854 | 14.713 | 1.00 | 0.00 | H |
| ATOM | 1379 | N    | ARG | 89 | -1.905 | 15.958 | 14.097 | 1.00 | 0.00 | N |
| ATOM | 1380 | CA   | ARG | 89 | -2.264 | 17.069 | 13.211 | 1.00 | 0.00 | C |
| ATOM | 1381 | C    | ARG | 89 | -3.324 | 16.665 | 12.169 | 1.00 | 0.00 | C |
| ATOM | 1382 | O    | ARG | 89 | -3.783 | 15.525 | 12.148 | 1.00 | 0.00 | O |
| ATOM | 1383 | CB   | ARG | 89 | -1.024 | 17.540 | 12.439 | 1.00 | 0.00 | C |
| ATOM | 1384 | CG   | ARG | 89 | 0.315  | 17.713 | 13.163 | 1.00 | 0.00 | C |
| ATOM | 1385 | CD   | ARG | 89 | 1.308  | 18.054 | 12.048 | 1.00 | 0.00 | C |
| ATOM | 1386 | NE   | ARG | 89 | 2.689  | 18.223 | 12.518 | 1.00 | 0.00 | N |
| ATOM | 1387 | CZ   | ARG | 89 | 3.744  | 18.147 | 11.711 | 1.00 | 0.00 | C |
| ATOM | 1388 | NH1  | ARG | 89 | 3.618  | 17.967 | 10.414 | 1.00 | 0.00 | N |
| ATOM | 1389 | NH2  | ARG | 89 | 4.960  | 18.251 | 12.202 | 1.00 | 0.00 | N |
| ATOM | 1390 | H    | ARG | 89 | -1.811 | 15.043 | 13.670 | 1.00 | 0.00 | H |
| ATOM | 1391 | HA   | ARG | 89 | -2.652 | 17.902 | 13.798 | 1.00 | 0.00 | H |
| ATOM | 1392 | HB2  | ARG | 89 | -0.868 | 16.826 | 11.625 | 1.00 | 0.00 | H |
| ATOM | 1393 | HB3  | ARG | 89 | -1.276 | 18.513 | 12.021 | 1.00 | 0.00 | H |
| ATOM | 1394 | HG2  | ARG | 89 | 0.257  | 18.522 | 13.892 | 1.00 | 0.00 | H |
| ATOM | 1395 | HG3  | ARG | 89 | 0.617  | 16.785 | 13.645 | 1.00 | 0.00 | H |
| ATOM | 1396 | HD2  | ARG | 89 | 1.288  | 17.234 | 11.329 | 1.00 | 0.00 | H |
| ATOM | 1397 | HD3  | ARG | 89 | 0.982  | 18.964 | 11.539 | 1.00 | 0.00 | H |
| ATOM | 1398 | HE   | ARG | 89 | 2.816  | 18.406 | 13.499 | 1.00 | 0.00 | H |
| ATOM | 1399 | HH11 | ARG | 89 | 2.681  | 18.016 | 9.984  | 1.00 | 0.00 | H |
| ATOM | 1400 | HH12 | ARG | 89 | 4.401  | 17.890 | 9.799  | 1.00 | 0.00 | H |
| ATOM | 1401 | HH21 | ARG | 89 | 5.092  | 18.457 | 13.174 | 1.00 | 0.00 | H |
| ATOM | 1402 | HH22 | ARG | 89 | 5.753  | 18.174 | 11.585 | 1.00 | 0.00 | H |
| ATOM | 1403 | N    | ALA | 90 | -3.654 | 17.577 | 11.247 | 1.00 | 0.00 | N |
| ATOM | 1404 | CA   | ALA | 90 | -4.536 | 17.301 | 10.110 | 1.00 | 0.00 | C |
| ATOM | 1405 | C    | ALA | 90 | -3.897 | 16.313 | 9.116  | 1.00 | 0.00 | C |
| ATOM | 1406 | O    | ALA | 90 | -4.534 | 15.320 | 8.771  | 1.00 | 0.00 | O |
| ATOM | 1407 | CB   | ALA | 90 | -4.900 | 18.633 | 9.442  | 1.00 | 0.00 | C |
| ATOM | 1408 | H    | ALA | 90 | -3.148 | 18.451 | 11.242 | 1.00 | 0.00 | H |
| ATOM | 1409 | HA   | ALA | 90 | -5.455 | 16.836 | 10.476 | 1.00 | 0.00 | H |
| ATOM | 1410 | HB1  | ALA | 90 | -4.001 | 19.135 | 9.081  | 1.00 | 0.00 | H |
| ATOM | 1411 | HB2  | ALA | 90 | -5.560 | 18.444 | 8.594  | 1.00 | 0.00 | H |
| ATOM | 1412 | HB3  | ALA | 90 | -5.415 | 19.277 | 10.156 | 1.00 | 0.00 | H |
| ATOM | 1413 | N    | GLU | 91 | -2.626 | 16.516 | 8.752  | 1.00 | 0.00 | N |
| ATOM | 1414 | CA   | GLU | 91 | -1.919 | 15.722 | 7.728  | 1.00 | 0.00 | C |
| ATOM | 1415 | C    | GLU | 91 | -1.614 | 14.267 | 8.162  | 1.00 | 0.00 | C |
| ATOM | 1416 | O    | GLU | 91 | -0.958 | 13.529 | 7.424  | 1.00 | 0.00 | O |
| ATOM | 1417 | CB   | GLU | 91 | -0.606 | 16.392 | 7.253  | 1.00 | 0.00 | C |
| ATOM | 1418 | CG   | GLU | 91 | -0.460 | 17.915 | 7.385  | 1.00 | 0.00 | C |
| ATOM | 1419 | CD   | GLU | 91 | -0.004 | 18.294 | 8.793  | 1.00 | 0.00 | C |
| ATOM | 1420 | OE1  | GLU | 91 | 1.227  | 18.286 | 9.048  | 1.00 | 0.00 | O |
| ATOM | 1421 | OE2  | GLU | 91 | -0.897 | 18.514 | 9.644  | 1.00 | 0.00 | O |

|      |      |      |     |    |         |        |        |      |      |   |
|------|------|------|-----|----|---------|--------|--------|------|------|---|
| ATOM | 1422 | H    | GLU | 91 | -2.152  | 17.340 | 9.120  | 1.00 | 0.00 | H |
| ATOM | 1423 | HA   | GLU | 91 | -2.584  | 15.667 | 6.864  | 1.00 | 0.00 | H |
| ATOM | 1424 | HB2  | GLU | 91 | 0.241   | 15.935 | 7.770  | 1.00 | 0.00 | H |
| ATOM | 1425 | HB3  | GLU | 91 | -0.496  | 16.150 | 6.195  | 1.00 | 0.00 | H |
| ATOM | 1426 | HG2  | GLU | 91 | 0.296   | 18.253 | 6.675  | 1.00 | 0.00 | H |
| ATOM | 1427 | HG3  | GLU | 91 | -1.403  | 18.405 | 7.136  | 1.00 | 0.00 | H |
| ATOM | 1428 | N    | ASP | 92 | -2.043  | 13.863 | 9.364  | 1.00 | 0.00 | N |
| ATOM | 1429 | CA   | ASP | 92 | -1.922  | 12.511 | 9.917  | 1.00 | 0.00 | C |
| ATOM | 1430 | C    | ASP | 92 | -3.245  | 11.699 | 9.846  | 1.00 | 0.00 | C |
| ATOM | 1431 | O    | ASP | 92 | -3.261  | 10.541 | 10.273 | 1.00 | 0.00 | O |
| ATOM | 1432 | CB   | ASP | 92 | -1.437  | 12.594 | 11.383 | 1.00 | 0.00 | C |
| ATOM | 1433 | CG   | ASP | 92 | -0.066  | 13.243 | 11.633 | 1.00 | 0.00 | C |
| ATOM | 1434 | OD1  | ASP | 92 | 0.885   | 13.067 | 10.829 | 1.00 | 0.00 | O |
| ATOM | 1435 | OD2  | ASP | 92 | 0.079   | 13.867 | 12.711 | 1.00 | 0.00 | O |
| ATOM | 1436 | H    | ASP | 92 | -2.594  | 14.524 | 9.894  | 1.00 | 0.00 | H |
| ATOM | 1437 | HA   | ASP | 92 | -1.192  | 11.966 | 9.329  | 1.00 | 0.00 | H |
| ATOM | 1438 | HB2  | ASP | 92 | -2.185  | 13.137 | 11.962 | 1.00 | 0.00 | H |
| ATOM | 1439 | HB3  | ASP | 92 | -1.383  | 11.584 | 11.787 | 1.00 | 0.00 | H |
| ATOM | 1440 | N    | THR | 93 | -4.346  | 12.298 | 9.353  | 1.00 | 0.00 | N |
| ATOM | 1441 | CA   | THR | 93 | -5.700  | 11.702 | 9.333  | 1.00 | 0.00 | C |
| ATOM | 1442 | C    | THR | 93 | -5.863  | 10.779 | 8.130  | 1.00 | 0.00 | C |
| ATOM | 1443 | O    | THR | 93 | -5.730  | 11.203 | 6.984  | 1.00 | 0.00 | O |
| ATOM | 1444 | CB   | THR | 93 | -6.767  | 12.802 | 9.340  | 1.00 | 0.00 | C |
| ATOM | 1445 | CG2  | THR | 93 | -8.201  | 12.292 | 9.179  | 1.00 | 0.00 | C |
| ATOM | 1446 | OG1  | THR | 93 | -6.707  | 13.421 | 10.601 | 1.00 | 0.00 | O |
| ATOM | 1447 | H    | THR | 93 | -4.237  | 13.233 | 8.971  | 1.00 | 0.00 | H |
| ATOM | 1448 | HA   | THR | 93 | -5.833  | 11.108 | 10.237 | 1.00 | 0.00 | H |
| ATOM | 1449 | HB   | THR | 93 | -6.561  | 13.532 | 8.554  | 1.00 | 0.00 | H |
| ATOM | 1450 | HG1  | THR | 93 | -5.947  | 14.018 | 10.583 | 1.00 | 0.00 | H |
| ATOM | 1451 | HG21 | THR | 93 | -8.408  | 11.516 | 9.909  | 1.00 | 0.00 | H |
| ATOM | 1452 | HG22 | THR | 93 | -8.895  | 13.121 | 9.323  | 1.00 | 0.00 | H |
| ATOM | 1453 | HG23 | THR | 93 | -8.344  | 11.895 | 8.175  | 1.00 | 0.00 | H |
| ATOM | 1454 | N    | GLY | 94 | -6.182  | 9.511  | 8.398  | 1.00 | 0.00 | N |
| ATOM | 1455 | CA   | GLY | 94 | -6.264  | 8.467  | 7.373  | 1.00 | 0.00 | C |
| ATOM | 1456 | C    | GLY | 94 | -6.462  | 7.051  | 7.907  | 1.00 | 0.00 | C |
| ATOM | 1457 | O    | GLY | 94 | -6.748  | 6.850  | 9.087  | 1.00 | 0.00 | O |
| ATOM | 1458 | H    | GLY | 94 | -6.317  | 9.250  | 9.365  | 1.00 | 0.00 | H |
| ATOM | 1459 | HA2  | GLY | 94 | -7.079  | 8.701  | 6.688  | 1.00 | 0.00 | H |
| ATOM | 1460 | HA3  | GLY | 94 | -5.345  | 8.492  | 6.791  | 1.00 | 0.00 | H |
| ATOM | 1461 | N    | ILE | 95 | -6.311  | 6.063  | 7.021  | 1.00 | 0.00 | N |
| ATOM | 1462 | CA   | ILE | 95 | -6.341  | 4.625  | 7.352  | 1.00 | 0.00 | C |
| ATOM | 1463 | C    | ILE | 95 | -4.906  | 4.109  | 7.500  | 1.00 | 0.00 | C |
| ATOM | 1464 | O    | ILE | 95 | -4.159  | 4.106  | 6.526  | 1.00 | 0.00 | O |
| ATOM | 1465 | CB   | ILE | 95 | -7.105  | 3.805  | 6.281  | 1.00 | 0.00 | C |
| ATOM | 1466 | CG1  | ILE | 95 | -8.493  | 4.411  | 5.963  | 1.00 | 0.00 | C |
| ATOM | 1467 | CG2  | ILE | 95 | -7.247  | 2.344  | 6.766  | 1.00 | 0.00 | C |
| ATOM | 1468 | CD1  | ILE | 95 | -9.234  | 3.714  | 4.815  | 1.00 | 0.00 | C |
| ATOM | 1469 | H    | ILE | 95 | -6.071  | 6.332  | 6.068  | 1.00 | 0.00 | H |
| ATOM | 1470 | HA   | ILE | 95 | -6.842  | 4.480  | 8.305  | 1.00 | 0.00 | H |
| ATOM | 1471 | HB   | ILE | 95 | -6.520  | 3.805  | 5.361  | 1.00 | 0.00 | H |
| ATOM | 1472 | HG12 | ILE | 95 | -9.116  | 4.384  | 6.860  | 1.00 | 0.00 | H |
| ATOM | 1473 | HG13 | ILE | 95 | -8.374  | 5.453  | 5.666  | 1.00 | 0.00 | H |
| ATOM | 1474 | HG21 | ILE | 95 | -7.860  | 2.303  | 7.667  | 1.00 | 0.00 | H |
| ATOM | 1475 | HG22 | ILE | 95 | -7.708  | 1.730  | 5.994  | 1.00 | 0.00 | H |
| ATOM | 1476 | HG23 | ILE | 95 | -6.270  | 1.911  | 6.982  | 1.00 | 0.00 | H |
| ATOM | 1477 | HD11 | ILE | 95 | -9.539  | 2.709  | 5.107  | 1.00 | 0.00 | H |
| ATOM | 1478 | HD12 | ILE | 95 | -10.127 | 4.287  | 4.567  | 1.00 | 0.00 | H |

|      |      |      |     |    |        |        |        |      |      |   |
|------|------|------|-----|----|--------|--------|--------|------|------|---|
| ATOM | 1479 | HD13 | ILE | 95 | -8.591 | 3.661  | 3.936  | 1.00 | 0.00 | H |
| ATOM | 1480 | N    | TYR | 96 | -4.519 | 3.647  | 8.685  | 1.00 | 0.00 | N |
| ATOM | 1481 | CA   | TYR | 96 | -3.204 | 3.077  | 8.985  | 1.00 | 0.00 | C |
| ATOM | 1482 | C    | TYR | 96 | -3.249 | 1.550  | 8.860  | 1.00 | 0.00 | C |
| ATOM | 1483 | O    | TYR | 96 | -3.918 | 0.886  | 9.654  | 1.00 | 0.00 | O |
| ATOM | 1484 | CB   | TYR | 96 | -2.783 | 3.469  | 10.413 | 1.00 | 0.00 | C |
| ATOM | 1485 | CG   | TYR | 96 | -2.331 | 4.905  | 10.603 | 1.00 | 0.00 | C |
| ATOM | 1486 | CD1  | TYR | 96 | -3.267 | 5.955  | 10.560 | 1.00 | 0.00 | C |
| ATOM | 1487 | CD2  | TYR | 96 | -0.980 | 5.190  | 10.887 | 1.00 | 0.00 | C |
| ATOM | 1488 | CE1  | TYR | 96 | -2.866 | 7.280  | 10.807 | 1.00 | 0.00 | C |
| ATOM | 1489 | CE2  | TYR | 96 | -0.571 | 6.515  | 11.141 | 1.00 | 0.00 | C |
| ATOM | 1490 | CZ   | TYR | 96 | -1.517 | 7.564  | 11.112 | 1.00 | 0.00 | C |
| ATOM | 1491 | OH   | TYR | 96 | -1.135 | 8.851  | 11.350 | 1.00 | 0.00 | O |
| ATOM | 1492 | H    | TYR | 96 | -5.217 | 3.592  | 9.419  | 1.00 | 0.00 | H |
| ATOM | 1493 | HA   | TYR | 96 | -2.460 | 3.460  | 8.289  | 1.00 | 0.00 | H |
| ATOM | 1494 | HB2  | TYR | 96 | -3.614 | 3.273  | 11.094 | 1.00 | 0.00 | H |
| ATOM | 1495 | HB3  | TYR | 96 | -1.967 | 2.816  | 10.719 | 1.00 | 0.00 | H |
| ATOM | 1496 | HD1  | TYR | 96 | -4.309 | 5.753  | 10.357 | 1.00 | 0.00 | H |
| ATOM | 1497 | HD2  | TYR | 96 | -0.256 | 4.392  | 10.931 | 1.00 | 0.00 | H |
| ATOM | 1498 | HE1  | TYR | 96 | -3.594 | 8.075  | 10.772 | 1.00 | 0.00 | H |
| ATOM | 1499 | HE2  | TYR | 96 | 0.459  | 6.732  | 11.376 | 1.00 | 0.00 | H |
| ATOM | 1500 | HH   | TYR | 96 | -1.893 | 9.452  | 11.313 | 1.00 | 0.00 | H |
| ATOM | 1501 | N    | TYR | 97 | -2.514 | 0.994  | 7.897  | 1.00 | 0.00 | N |
| ATOM | 1502 | CA   | TYR | 97 | -2.350 | -0.448 | 7.692  | 1.00 | 0.00 | C |
| ATOM | 1503 | C    | TYR | 97 | -0.987 | -0.930 | 8.215  | 1.00 | 0.00 | C |
| ATOM | 1504 | O    | TYR | 97 | 0.030  | -0.241 | 8.041  | 1.00 | 0.00 | O |
| ATOM | 1505 | CB   | TYR | 97 | -2.431 | -0.781 | 6.197  | 1.00 | 0.00 | C |
| ATOM | 1506 | CG   | TYR | 97 | -3.708 | -0.389 | 5.478  | 1.00 | 0.00 | C |
| ATOM | 1507 | CD1  | TYR | 97 | -4.761 | -1.314 | 5.350  | 1.00 | 0.00 | C |
| ATOM | 1508 | CD2  | TYR | 97 | -3.816 | 0.885  | 4.882  | 1.00 | 0.00 | C |
| ATOM | 1509 | CE1  | TYR | 97 | -5.904 | -0.985 | 4.597  | 1.00 | 0.00 | C |
| ATOM | 1510 | CE2  | TYR | 97 | -4.963 | 1.226  | 4.143  | 1.00 | 0.00 | C |
| ATOM | 1511 | CZ   | TYR | 97 | -5.998 | 0.278  | 3.974  | 1.00 | 0.00 | C |
| ATOM | 1512 | OH   | TYR | 97 | -7.070 | 0.587  | 3.196  | 1.00 | 0.00 | O |
| ATOM | 1513 | H    | TYR | 97 | -1.998 | 1.599  | 7.269  | 1.00 | 0.00 | H |
| ATOM | 1514 | HA   | TYR | 97 | -3.140 | -0.997 | 8.210  | 1.00 | 0.00 | H |
| ATOM | 1515 | HB2  | TYR | 97 | -1.595 | -0.295 | 5.690  | 1.00 | 0.00 | H |
| ATOM | 1516 | HB3  | TYR | 97 | -2.292 | -1.858 | 6.081  | 1.00 | 0.00 | H |
| ATOM | 1517 | HD1  | TYR | 97 | -4.694 | -2.282 | 5.831  | 1.00 | 0.00 | H |
| ATOM | 1518 | HD2  | TYR | 97 | -3.013 | 1.600  | 4.991  | 1.00 | 0.00 | H |
| ATOM | 1519 | HE1  | TYR | 97 | -6.715 | -1.697 | 4.509  | 1.00 | 0.00 | H |
| ATOM | 1520 | HE2  | TYR | 97 | -5.053 | 2.201  | 3.686  | 1.00 | 0.00 | H |
| ATOM | 1521 | HH   | TYR | 97 | -7.631 | -0.179 | 3.025  | 1.00 | 0.00 | H |
| ATOM | 1522 | N    | CYS | 98 | -0.947 | -2.134 | 8.785  | 1.00 | 0.00 | N |
| ATOM | 1523 | CA   | CYS | 98 | 0.305  | -2.838 | 9.090  | 1.00 | 0.00 | C |
| ATOM | 1524 | C    | CYS | 98 | 0.787  | -3.693 | 7.899  | 1.00 | 0.00 | C |
| ATOM | 1525 | O    | CYS | 98 | -0.020 | -4.074 | 7.044  | 1.00 | 0.00 | O |
| ATOM | 1526 | CB   | CYS | 98 | 0.106  | -3.664 | 10.368 | 1.00 | 0.00 | C |
| ATOM | 1527 | SG   | CYS | 98 | -1.073 | -4.995 | 10.024 | 1.00 | 0.00 | S |
| ATOM | 1528 | H    | CYS | 98 | -1.831 | -2.639 | 8.872  | 1.00 | 0.00 | H |
| ATOM | 1529 | HA   | CYS | 98 | 1.085  | -2.102 | 9.290  | 1.00 | 0.00 | H |
| ATOM | 1530 | HB2  | CYS | 98 | 1.060  | -4.093 | 10.689 | 1.00 | 0.00 | H |
| ATOM | 1531 | HB3  | CYS | 98 | -0.274 | -3.015 | 11.163 | 1.00 | 0.00 | H |
| ATOM | 1532 | HG   | CYS | 98 | -2.098 | -4.259 | 9.547  | 1.00 | 0.00 | H |
| ATOM | 1533 | N    | THR | 99 | 2.090  | -4.011 | 7.886  | 1.00 | 0.00 | N |
| ATOM | 1534 | CA   | THR | 99 | 2.742  | -4.902 | 6.915  | 1.00 | 0.00 | C |
| ATOM | 1535 | C    | THR | 99 | 4.089  | -5.398 | 7.445  | 1.00 | 0.00 | C |

|      |      |      |     |     |        |         |        |      |      |   |
|------|------|------|-----|-----|--------|---------|--------|------|------|---|
| ATOM | 1536 | O    | THR | 99  | 4.842  | -4.634  | 8.048  | 1.00 | 0.00 | O |
| ATOM | 1537 | CB   | THR | 99  | 2.831  | -4.218  | 5.545  | 1.00 | 0.00 | C |
| ATOM | 1538 | CG2  | THR | 99  | 3.812  | -3.051  | 5.483  | 1.00 | 0.00 | C |
| ATOM | 1539 | OG1  | THR | 99  | 3.221  | -5.183  | 4.615  | 1.00 | 0.00 | O |
| ATOM | 1540 | H    | THR | 99  | 2.703  | -3.574  | 8.567  | 1.00 | 0.00 | H |
| ATOM | 1541 | HA   | THR | 99  | 2.103  | -5.770  | 6.786  | 1.00 | 0.00 | H |
| ATOM | 1542 | HB   | THR | 99  | 1.845  | -3.852  | 5.264  | 1.00 | 0.00 | H |
| ATOM | 1543 | HG1  | THR | 99  | 3.558  | -4.709  | 3.822  | 1.00 | 0.00 | H |
| ATOM | 1544 | HG21 | THR | 99  | 4.831  | -3.408  | 5.625  | 1.00 | 0.00 | H |
| ATOM | 1545 | HG22 | THR | 99  | 3.742  | -2.568  | 4.509  | 1.00 | 0.00 | H |
| ATOM | 1546 | HG23 | THR | 99  | 3.576  | -2.318  | 6.252  | 1.00 | 0.00 | H |
| ATOM | 1547 | N    | SER | 100 | 4.395  | -6.684  | 7.265  | 1.00 | 0.00 | N |
| ATOM | 1548 | CA   | SER | 100 | 5.694  | -7.255  | 7.664  | 1.00 | 0.00 | C |
| ATOM | 1549 | C    | SER | 100 | 6.619  | -7.500  | 6.461  | 1.00 | 0.00 | C |
| ATOM | 1550 | O    | SER | 100 | 6.578  | -8.586  | 5.887  | 1.00 | 0.00 | O |
| ATOM | 1551 | CB   | SER | 100 | 5.526  | -8.576  | 8.437  | 1.00 | 0.00 | C |
| ATOM | 1552 | OG   | SER | 100 | 4.712  | -8.461  | 9.590  | 1.00 | 0.00 | O |
| ATOM | 1553 | H    | SER | 100 | 3.769  | -7.253  | 6.713  | 1.00 | 0.00 | H |
| ATOM | 1554 | HA   | SER | 100 | 6.215  | -6.569  | 8.333  | 1.00 | 0.00 | H |
| ATOM | 1555 | HB2  | SER | 100 | 5.100  | -9.325  | 7.776  | 1.00 | 0.00 | H |
| ATOM | 1556 | HB3  | SER | 100 | 6.514  | -8.916  | 8.748  | 1.00 | 0.00 | H |
| ATOM | 1557 | HG   | SER | 100 | 3.831  | -8.200  | 9.300  | 1.00 | 0.00 | H |
| ATOM | 1558 | N    | ASN | 101 | 7.470  | -6.510  | 6.149  | 1.00 | 0.00 | N |
| ATOM | 1559 | CA   | ASN | 101 | 8.746  | -6.588  | 5.408  | 1.00 | 0.00 | C |
| ATOM | 1560 | C    | ASN | 101 | 9.247  | -5.243  | 4.851  | 1.00 | 0.00 | C |
| ATOM | 1561 | O    | ASN | 101 | 8.482  | -4.316  | 4.611  | 1.00 | 0.00 | O |
| ATOM | 1562 | CB   | ASN | 101 | 8.788  | -7.658  | 4.297  | 1.00 | 0.00 | C |
| ATOM | 1563 | CG   | ASN | 101 | 9.337  | -8.997  | 4.770  | 1.00 | 0.00 | C |
| ATOM | 1564 | ND2  | ASN | 101 | 8.947  | -10.077 | 4.123  | 1.00 | 0.00 | N |
| ATOM | 1565 | OD1  | ASN | 101 | 10.181 | -9.068  | 5.653  | 1.00 | 0.00 | O |
| ATOM | 1566 | H    | ASN | 101 | 7.318  | -5.633  | 6.625  | 1.00 | 0.00 | H |
| ATOM | 1567 | HA   | ASN | 101 | 9.488  | -6.861  | 6.158  | 1.00 | 0.00 | H |
| ATOM | 1568 | HB2  | ASN | 101 | 7.803  | -7.776  | 3.850  | 1.00 | 0.00 | H |
| ATOM | 1569 | HB3  | ASN | 101 | 9.451  | -7.333  | 3.500  | 1.00 | 0.00 | H |
| ATOM | 1570 | HD21 | ASN | 101 | 9.255  | -10.974 | 4.443  | 1.00 | 0.00 | H |
| ATOM | 1571 | HD22 | ASN | 101 | 8.300  | -9.977  | 3.343  | 1.00 | 0.00 | H |
| ATOM | 1572 | N    | VAL | 102 | 10.768 | -5.240  | 4.563  | 1.00 | 0.00 | N |
| ATOM | 1573 | CA   | VAL | 102 | 10.730 | -3.873  | 4.051  | 1.00 | 0.00 | C |
| ATOM | 1574 | C    | VAL | 102 | 10.864 | -3.853  | 2.548  | 1.00 | 0.00 | C |
| ATOM | 1575 | O    | VAL | 102 | 10.454 | -2.630  | 2.153  | 1.00 | 0.00 | O |
| ATOM | 1576 | CB   | VAL | 102 | 11.872 | -3.016  | 4.729  | 1.00 | 0.00 | C |
| ATOM | 1577 | CG1  | VAL | 102 | 12.901 | -2.357  | 3.770  | 1.00 | 0.00 | C |
| ATOM | 1578 | CG2  | VAL | 102 | 11.346 | -1.862  | 5.617  | 1.00 | 0.00 | C |
| ATOM | 1579 | H    | VAL | 102 | 11.416 | -5.840  | 4.668  | 1.00 | 0.00 | H |
| ATOM | 1580 | HA   | VAL | 102 | 9.748  | -3.429  | 4.294  | 1.00 | 0.00 | H |
| ATOM | 1581 | HB   | VAL | 102 | 12.447 | -3.699  | 5.388  | 1.00 | 0.00 | H |
| ATOM | 1582 | HG11 | VAL | 102 | 12.426 | -1.665  | 3.048  | 1.00 | 0.00 | H |
| ATOM | 1583 | HG12 | VAL | 102 | 13.676 | -1.783  | 4.314  | 1.00 | 0.00 | H |
| ATOM | 1584 | HG13 | VAL | 102 | 13.465 | -3.103  | 3.179  | 1.00 | 0.00 | H |
| ATOM | 1585 | HG21 | VAL | 102 | 10.646 | -2.225  | 6.392  | 1.00 | 0.00 | H |
| ATOM | 1586 | HG22 | VAL | 102 | 12.166 | -1.354  | 6.161  | 1.00 | 0.00 | H |
| ATOM | 1587 | HG23 | VAL | 102 | 10.813 | -1.089  | 5.031  | 1.00 | 0.00 | H |
| ATOM | 1588 | N    | ALA | 103 | 10.313 | -4.864  | 1.842  | 1.00 | 0.00 | N |
| ATOM | 1589 | CA   | ALA | 103 | 9.553  | -5.004  | 0.603  | 1.00 | 0.00 | C |
| ATOM | 1590 | C    | ALA | 103 | 9.247  | -6.512  | 0.448  | 1.00 | 0.00 | C |
| ATOM | 1591 | O    | ALA | 103 | 9.950  | -7.320  | 1.052  | 1.00 | 0.00 | O |
| ATOM | 1592 | CB   | ALA | 103 | 10.359 | -4.451  | -0.583 | 1.00 | 0.00 | C |

|      |      |     |     |     |        |         |        |      |      |   |
|------|------|-----|-----|-----|--------|---------|--------|------|------|---|
| ATOM | 1593 | H   | ALA | 103 | 10.565 | -5.758  | 2.240  | 1.00 | 0.00 | H |
| ATOM | 1594 | HA  | ALA | 103 | 8.611  | -4.461  | 0.700  | 1.00 | 0.00 | H |
| ATOM | 1595 | HB1 | ALA | 103 | 11.278 | -5.026  | -0.706 | 1.00 | 0.00 | H |
| ATOM | 1596 | HB2 | ALA | 103 | 9.773  | -4.534  | -1.494 | 1.00 | 0.00 | H |
| ATOM | 1597 | HB3 | ALA | 103 | 10.620 | -3.408  | -0.409 | 1.00 | 0.00 | H |
| ATOM | 1598 | N   | MET | 104 | 8.201  | -6.880  | -0.302 | 1.00 | 0.00 | N |
| ATOM | 1599 | CA  | MET | 104 | 7.684  | -8.256  | -0.443 | 1.00 | 0.00 | C |
| ATOM | 1600 | C   | MET | 104 | 6.961  | -8.677  | 0.841  | 1.00 | 0.00 | C |
| ATOM | 1601 | O   | MET | 104 | 7.474  | -9.417  | 1.684  | 1.00 | 0.00 | O |
| ATOM | 1602 | CB  | MET | 104 | 8.766  | -9.256  | -0.898 | 1.00 | 0.00 | C |
| ATOM | 1603 | CG  | MET | 104 | 8.100  | -10.483 | -1.527 | 1.00 | 0.00 | C |
| ATOM | 1604 | SD  | MET | 104 | 9.271  | -11.696 | -2.177 | 1.00 | 0.00 | S |
| ATOM | 1605 | CE  | MET | 104 | 8.125  | -12.682 | -3.167 | 1.00 | 0.00 | C |
| ATOM | 1606 | H   | MET | 104 | 7.660  | -6.144  | -0.731 | 1.00 | 0.00 | H |
| ATOM | 1607 | HA  | MET | 104 | 6.920  | -8.232  | -1.217 | 1.00 | 0.00 | H |
| ATOM | 1608 | HB2 | MET | 104 | 9.408  | -8.789  | -1.645 | 1.00 | 0.00 | H |
| ATOM | 1609 | HB3 | MET | 104 | 9.388  | -9.568  | -0.057 | 1.00 | 0.00 | H |
| ATOM | 1610 | HG2 | MET | 104 | 7.471  | -10.968 | -0.777 | 1.00 | 0.00 | H |
| ATOM | 1611 | HG3 | MET | 104 | 7.472  | -10.151 | -2.352 | 1.00 | 0.00 | H |
| ATOM | 1612 | HE1 | MET | 104 | 7.635  | -12.044 | -3.901 | 1.00 | 0.00 | H |
| ATOM | 1613 | HE2 | MET | 104 | 8.687  | -13.450 | -3.698 | 1.00 | 0.00 | H |
| ATOM | 1614 | HE3 | MET | 104 | 7.382  | -13.144 | -2.521 | 1.00 | 0.00 | H |
| ATOM | 1615 | N   | ASP | 105 | 5.776  | -8.100  | 0.995  | 1.00 | 0.00 | N |
| ATOM | 1616 | CA  | ASP | 105 | 5.161  | -7.847  | 2.285  | 1.00 | 0.00 | C |
| ATOM | 1617 | C   | ASP | 105 | 3.666  | -8.227  | 2.322  | 1.00 | 0.00 | C |
| ATOM | 1618 | O   | ASP | 105 | 3.151  | -8.958  | 1.469  | 1.00 | 0.00 | O |
| ATOM | 1619 | CB  | ASP | 105 | 5.478  | -6.378  | 2.631  | 1.00 | 0.00 | C |
| ATOM | 1620 | CG  | ASP | 105 | 4.709  | -5.346  | 1.796  | 1.00 | 0.00 | C |
| ATOM | 1621 | OD1 | ASP | 105 | 4.436  | -5.607  | 0.603  | 1.00 | 0.00 | O |
| ATOM | 1622 | OD2 | ASP | 105 | 4.390  | -4.283  | 2.370  | 1.00 | 0.00 | O |
| ATOM | 1623 | H   | ASP | 105 | 5.432  | -7.500  | 0.257  | 1.00 | 0.00 | H |
| ATOM | 1624 | HA  | ASP | 105 | 5.648  | -8.462  | 3.046  | 1.00 | 0.00 | H |
| ATOM | 1625 | HB2 | ASP | 105 | 5.286  | -6.224  | 3.690  | 1.00 | 0.00 | H |
| ATOM | 1626 | HB3 | ASP | 105 | 6.546  | -6.199  | 2.490  | 1.00 | 0.00 | H |
| ATOM | 1627 | N   | TYR | 106 | 2.987  | -7.851  | 3.405  | 1.00 | 0.00 | N |
| ATOM | 1628 | CA  | TYR | 106 | 2.130  | -8.794  | 4.124  | 1.00 | 0.00 | C |
| ATOM | 1629 | C   | TYR | 106 | 1.080  | -8.048  | 4.959  | 1.00 | 0.00 | C |
| ATOM | 1630 | O   | TYR | 106 | 1.169  | -7.908  | 6.180  | 1.00 | 0.00 | O |
| ATOM | 1631 | CB  | TYR | 106 | 3.074  | -9.700  | 4.930  | 1.00 | 0.00 | C |
| ATOM | 1632 | CG  | TYR | 106 | 2.479  | -10.770 | 5.816  | 1.00 | 0.00 | C |
| ATOM | 1633 | CD1 | TYR | 106 | 3.338  | -11.376 | 6.744  | 1.00 | 0.00 | C |
| ATOM | 1634 | CD2 | TYR | 106 | 1.133  | -11.186 | 5.721  | 1.00 | 0.00 | C |
| ATOM | 1635 | CE1 | TYR | 106 | 2.849  | -12.357 | 7.621  | 1.00 | 0.00 | C |
| ATOM | 1636 | CE2 | TYR | 106 | 0.633  | -12.149 | 6.616  | 1.00 | 0.00 | C |
| ATOM | 1637 | CZ  | TYR | 106 | 1.490  | -12.721 | 7.584  | 1.00 | 0.00 | C |
| ATOM | 1638 | OH  | TYR | 106 | 1.012  | -13.610 | 8.494  | 1.00 | 0.00 | O |
| ATOM | 1639 | H   | TYR | 106 | 3.378  | -7.093  | 3.953  | 1.00 | 0.00 | H |
| ATOM | 1640 | HA  | TYR | 106 | 1.600  | -9.414  | 3.400  | 1.00 | 0.00 | H |
| ATOM | 1641 | HB2 | TYR | 106 | 3.741  | -10.205 | 4.231  | 1.00 | 0.00 | H |
| ATOM | 1642 | HB3 | TYR | 106 | 3.698  | -9.062  | 5.555  | 1.00 | 0.00 | H |
| ATOM | 1643 | HD1 | TYR | 106 | 4.379  | -11.091 | 6.788  | 1.00 | 0.00 | H |
| ATOM | 1644 | HD2 | TYR | 106 | 0.468  | -10.758 | 4.989  | 1.00 | 0.00 | H |
| ATOM | 1645 | HE1 | TYR | 106 | 3.517  | -12.809 | 8.331  | 1.00 | 0.00 | H |
| ATOM | 1646 | HE2 | TYR | 106 | -0.405 | -12.434 | 6.564  | 1.00 | 0.00 | H |
| ATOM | 1647 | HH  | TYR | 106 | 0.059  | -13.696 | 8.475  | 1.00 | 0.00 | H |
| ATOM | 1648 | N   | TRP | 107 | 0.098  | -7.518  | 4.231  | 1.00 | 0.00 | N |
| ATOM | 1649 | CA  | TRP | 107 | -0.780 | -6.434  | 4.657  | 1.00 | 0.00 | C |

|      |      |      |     |     |        |        |        |      |      |   |
|------|------|------|-----|-----|--------|--------|--------|------|------|---|
| ATOM | 1650 | C    | TRP | 107 | -1.961 | -6.881 | 5.529  | 1.00 | 0.00 | C |
| ATOM | 1651 | O    | TRP | 107 | -2.604 | -7.899 | 5.255  | 1.00 | 0.00 | O |
| ATOM | 1652 | CB   | TRP | 107 | -1.255 | -5.713 | 3.392  | 1.00 | 0.00 | C |
| ATOM | 1653 | CG   | TRP | 107 | -0.159 | -5.025 | 2.644  | 1.00 | 0.00 | C |
| ATOM | 1654 | CD1  | TRP | 107 | 0.663  | -5.572 | 1.717  | 1.00 | 0.00 | C |
| ATOM | 1655 | CD2  | TRP | 107 | 0.300  | -3.656 | 2.816  | 1.00 | 0.00 | C |
| ATOM | 1656 | CE2  | TRP | 107 | 1.385  | -3.420 | 1.923  | 1.00 | 0.00 | C |
| ATOM | 1657 | CE3  | TRP | 107 | -0.081 | -2.599 | 3.667  | 1.00 | 0.00 | C |
| ATOM | 1658 | NE1  | TRP | 107 | 1.580  | -4.630 | 1.294  | 1.00 | 0.00 | N |
| ATOM | 1659 | CZ2  | TRP | 107 | 2.036  | -2.181 | 1.851  | 1.00 | 0.00 | C |
| ATOM | 1660 | CZ3  | TRP | 107 | 0.556  | -1.349 | 3.597  | 1.00 | 0.00 | C |
| ATOM | 1661 | CH2  | TRP | 107 | 1.607  | -1.136 | 2.684  | 1.00 | 0.00 | C |
| ATOM | 1662 | H    | TRP | 107 | 0.113  | -7.707 | 3.243  | 1.00 | 0.00 | H |
| ATOM | 1663 | HA   | TRP | 107 | -0.181 | -5.729 | 5.237  | 1.00 | 0.00 | H |
| ATOM | 1664 | HB2  | TRP | 107 | -1.760 | -6.416 | 2.727  | 1.00 | 0.00 | H |
| ATOM | 1665 | HB3  | TRP | 107 | -1.977 | -4.955 | 3.687  | 1.00 | 0.00 | H |
| ATOM | 1666 | HD1  | TRP | 107 | 0.636  | -6.598 | 1.382  | 1.00 | 0.00 | H |
| ATOM | 1667 | HE1  | TRP | 107 | 2.408  | -4.860 | 0.743  | 1.00 | 0.00 | H |
| ATOM | 1668 | HE3  | TRP | 107 | -0.867 | -2.765 | 4.389  | 1.00 | 0.00 | H |
| ATOM | 1669 | HZ2  | TRP | 107 | 2.869  | -2.059 | 1.178  | 1.00 | 0.00 | H |
| ATOM | 1670 | HZ3  | TRP | 107 | 0.234  | -0.558 | 4.253  | 1.00 | 0.00 | H |
| ATOM | 1671 | HH2  | TRP | 107 | 2.092  | -0.176 | 2.629  | 1.00 | 0.00 | H |
| ATOM | 1672 | N    | GLY | 108 | -2.266 | -6.072 | 6.552  | 1.00 | 0.00 | N |
| ATOM | 1673 | CA   | GLY | 108 | -3.398 | -6.258 | 7.474  | 1.00 | 0.00 | C |
| ATOM | 1674 | C    | GLY | 108 | -4.739 | -5.801 | 6.897  | 1.00 | 0.00 | C |
| ATOM | 1675 | O    | GLY | 108 | -4.974 | -5.920 | 5.693  | 1.00 | 0.00 | O |
| ATOM | 1676 | H    | GLY | 108 | -1.639 | -5.294 | 6.729  | 1.00 | 0.00 | H |
| ATOM | 1677 | HA2  | GLY | 108 | -3.494 | -7.313 | 7.735  | 1.00 | 0.00 | H |
| ATOM | 1678 | HA3  | GLY | 108 | -3.213 | -5.688 | 8.384  | 1.00 | 0.00 | H |
| ATOM | 1679 | N    | GLN | 109 | -5.641 | -5.335 | 7.766  | 1.00 | 0.00 | N |
| ATOM | 1680 | CA   | GLN | 109 | -7.001 | -4.895 | 7.414  | 1.00 | 0.00 | C |
| ATOM | 1681 | C    | GLN | 109 | -7.230 | -3.387 | 7.599  | 1.00 | 0.00 | C |
| ATOM | 1682 | O    | GLN | 109 | -8.163 | -2.862 | 6.999  | 1.00 | 0.00 | O |
| ATOM | 1683 | CB   | GLN | 109 | -8.045 | -5.745 | 8.175  | 1.00 | 0.00 | C |
| ATOM | 1684 | CG   | GLN | 109 | -8.125 | -5.486 | 9.692  | 1.00 | 0.00 | C |
| ATOM | 1685 | CD   | GLN | 109 | -8.906 | -6.567 | 10.445 | 1.00 | 0.00 | C |
| ATOM | 1686 | NE2  | GLN | 109 | -8.358 | -7.759 | 10.584 | 1.00 | 0.00 | N |
| ATOM | 1687 | OE1  | GLN | 109 | -9.983 | -6.351 | 10.979 | 1.00 | 0.00 | O |
| ATOM | 1688 | H    | GLN | 109 | -5.337 | -5.215 | 8.734  | 1.00 | 0.00 | H |
| ATOM | 1689 | HA   | GLN | 109 | -7.169 | -5.071 | 6.352  | 1.00 | 0.00 | H |
| ATOM | 1690 | HB2  | GLN | 109 | -9.032 | -5.554 | 7.744  | 1.00 | 0.00 | H |
| ATOM | 1691 | HB3  | GLN | 109 | -7.812 | -6.797 | 8.003  | 1.00 | 0.00 | H |
| ATOM | 1692 | HG2  | GLN | 109 | -7.123 | -5.472 | 10.103 | 1.00 | 0.00 | H |
| ATOM | 1693 | HG3  | GLN | 109 | -8.585 | -4.515 | 9.877  | 1.00 | 0.00 | H |
| ATOM | 1694 | HE21 | GLN | 109 | -8.817 | -8.378 | 11.249 | 1.00 | 0.00 | H |
| ATOM | 1695 | HE22 | GLN | 109 | -7.442 | -7.941 | 10.212 | 1.00 | 0.00 | H |
| ATOM | 1696 | N    | GLY | 110 | -6.365 | -2.685 | 8.348  | 1.00 | 0.00 | N |
| ATOM | 1697 | CA   | GLY | 110 | -6.383 | -1.223 | 8.491  | 1.00 | 0.00 | C |
| ATOM | 1698 | C    | GLY | 110 | -7.282 | -0.692 | 9.617  | 1.00 | 0.00 | C |
| ATOM | 1699 | O    | GLY | 110 | -8.411 | -1.145 | 9.804  | 1.00 | 0.00 | O |
| ATOM | 1700 | H    | GLY | 110 | -5.575 | -3.174 | 8.762  | 1.00 | 0.00 | H |
| ATOM | 1701 | HA2  | GLY | 110 | -5.366 | -0.893 | 8.685  | 1.00 | 0.00 | H |
| ATOM | 1702 | HA3  | GLY | 110 | -6.732 | -0.771 | 7.562  | 1.00 | 0.00 | H |
| ATOM | 1703 | N    | THR | 111 | -6.807 | 0.348  | 10.319 | 1.00 | 0.00 | N |
| ATOM | 1704 | CA   | THR | 111 | -7.580 | 1.151  | 11.295 | 1.00 | 0.00 | C |
| ATOM | 1705 | C    | THR | 111 | -7.713 | 2.579  | 10.772 | 1.00 | 0.00 | C |
| ATOM | 1706 | O    | THR | 111 | -6.711 | 3.138  | 10.327 | 1.00 | 0.00 | O |

|      |      |      |     |     |         |        |        |      |      |   |
|------|------|------|-----|-----|---------|--------|--------|------|------|---|
| ATOM | 1707 | CB   | THR | 111 | -6.864  | 1.168  | 12.653 | 1.00 | 0.00 | C |
| ATOM | 1708 | CG2  | THR | 111 | -7.566  | 2.026  | 13.703 | 1.00 | 0.00 | C |
| ATOM | 1709 | OG1  | THR | 111 | -6.855  | -0.129 | 13.192 | 1.00 | 0.00 | O |
| ATOM | 1710 | H    | THR | 111 | -5.863  | 0.651  | 10.111 | 1.00 | 0.00 | H |
| ATOM | 1711 | HA   | THR | 111 | -8.569  | 0.715  | 11.428 | 1.00 | 0.00 | H |
| ATOM | 1712 | HB   | THR | 111 | -5.834  | 1.513  | 12.524 | 1.00 | 0.00 | H |
| ATOM | 1713 | HG1  | THR | 111 | -6.245  | -0.132 | 13.933 | 1.00 | 0.00 | H |
| ATOM | 1714 | HG21 | THR | 111 | -8.626  | 1.776  | 13.738 | 1.00 | 0.00 | H |
| ATOM | 1715 | HG22 | THR | 111 | -7.122  | 1.837  | 14.677 | 1.00 | 0.00 | H |
| ATOM | 1716 | HG23 | THR | 111 | -7.443  | 3.083  | 13.469 | 1.00 | 0.00 | H |
| ATOM | 1717 | N    | THR | 112 | -8.895  | 3.208  | 10.843 | 1.00 | 0.00 | N |
| ATOM | 1718 | CA   | THR | 112 | -9.005  | 4.656  | 10.578 | 1.00 | 0.00 | C |
| ATOM | 1719 | C    | THR | 112 | -8.700  | 5.460  | 11.836 | 1.00 | 0.00 | C |
| ATOM | 1720 | O    | THR | 112 | -9.066  | 5.063  | 12.941 | 1.00 | 0.00 | O |
| ATOM | 1721 | CB   | THR | 112 | -10.313 | 5.056  | 9.891  | 1.00 | 0.00 | C |
| ATOM | 1722 | CG2  | THR | 112 | -11.545 | 5.000  | 10.793 | 1.00 | 0.00 | C |
| ATOM | 1723 | OG1  | THR | 112 | -10.152 | 6.378  | 9.430  | 1.00 | 0.00 | O |
| ATOM | 1724 | H    | THR | 112 | -9.677  | 2.737  | 11.272 | 1.00 | 0.00 | H |
| ATOM | 1725 | HA   | THR | 112 | -8.234  | 4.916  | 9.862  | 1.00 | 0.00 | H |
| ATOM | 1726 | HB   | THR | 112 | -10.472 | 4.400  | 9.033  | 1.00 | 0.00 | H |
| ATOM | 1727 | HG1  | THR | 112 | -11.004 | 6.685  | 9.104  | 1.00 | 0.00 | H |
| ATOM | 1728 | HG21 | THR | 112 | -11.451 | 5.732  | 11.597 | 1.00 | 0.00 | H |
| ATOM | 1729 | HG22 | THR | 112 | -12.435 | 5.221  | 10.206 | 1.00 | 0.00 | H |
| ATOM | 1730 | HG23 | THR | 112 | -11.642 | 4.002  | 11.223 | 1.00 | 0.00 | H |
| ATOM | 1731 | N    | VAL | 113 | -8.000  | 6.573  | 11.645 | 1.00 | 0.00 | N |
| ATOM | 1732 | CA   | VAL | 113 | -7.603  | 7.523  | 12.689 | 1.00 | 0.00 | C |
| ATOM | 1733 | C    | VAL | 113 | -8.156  | 8.892  | 12.304 | 1.00 | 0.00 | C |
| ATOM | 1734 | O    | VAL | 113 | -7.695  | 9.509  | 11.341 | 1.00 | 0.00 | O |
| ATOM | 1735 | CB   | VAL | 113 | -6.070  | 7.579  | 12.871 | 1.00 | 0.00 | C |
| ATOM | 1736 | CG1  | VAL | 113 | -5.660  | 8.607  | 13.940 | 1.00 | 0.00 | C |
| ATOM | 1737 | CG2  | VAL | 113 | -5.517  | 6.199  | 13.273 | 1.00 | 0.00 | C |
| ATOM | 1738 | H    | VAL | 113 | -7.755  | 6.799  | 10.681 | 1.00 | 0.00 | H |
| ATOM | 1739 | HA   | VAL | 113 | -8.041  | 7.219  | 13.641 | 1.00 | 0.00 | H |
| ATOM | 1740 | HB   | VAL | 113 | -5.615  | 7.862  | 11.923 | 1.00 | 0.00 | H |
| ATOM | 1741 | HG11 | VAL | 113 | -6.105  | 8.351  | 14.901 | 1.00 | 0.00 | H |
| ATOM | 1742 | HG12 | VAL | 113 | -4.573  | 8.623  | 14.039 | 1.00 | 0.00 | H |
| ATOM | 1743 | HG13 | VAL | 113 | -5.981  | 9.608  | 13.652 | 1.00 | 0.00 | H |
| ATOM | 1744 | HG21 | VAL | 113 | -5.728  | 5.460  | 12.498 | 1.00 | 0.00 | H |
| ATOM | 1745 | HG22 | VAL | 113 | -4.436  | 6.255  | 13.397 | 1.00 | 0.00 | H |
| ATOM | 1746 | HG23 | VAL | 113 | -5.972  | 5.873  | 14.209 | 1.00 | 0.00 | H |
| ATOM | 1747 | N    | THR | 114 | -9.148  | 9.348  | 13.071 | 1.00 | 0.00 | N |
| ATOM | 1748 | CA   | THR | 114 | -9.807  | 10.646 | 12.914 | 1.00 | 0.00 | C |
| ATOM | 1749 | C    | THR | 114 | -9.225  | 11.591 | 13.954 | 1.00 | 0.00 | C |
| ATOM | 1750 | O    | THR | 114 | -9.493  | 11.431 | 15.143 | 1.00 | 0.00 | O |
| ATOM | 1751 | CB   | THR | 114 | -11.321 | 10.484 | 13.086 | 1.00 | 0.00 | C |
| ATOM | 1752 | CG2  | THR | 114 | -12.081 | 11.787 | 12.838 | 1.00 | 0.00 | C |
| ATOM | 1753 | OG1  | THR | 114 | -11.781 | 9.547  | 12.135 | 1.00 | 0.00 | O |
| ATOM | 1754 | H    | THR | 114 | -9.480  | 8.742  | 13.815 | 1.00 | 0.00 | H |
| ATOM | 1755 | HA   | THR | 114 | -9.629  | 11.040 | 11.914 | 1.00 | 0.00 | H |
| ATOM | 1756 | HB   | THR | 114 | -11.539 | 10.119 | 14.092 | 1.00 | 0.00 | H |
| ATOM | 1757 | HG1  | THR | 114 | -12.705 | 9.373  | 12.323 | 1.00 | 0.00 | H |
| ATOM | 1758 | HG21 | THR | 114 | -11.873 | 12.157 | 11.833 | 1.00 | 0.00 | H |
| ATOM | 1759 | HG22 | THR | 114 | -13.153 | 11.622 | 12.946 | 1.00 | 0.00 | H |
| ATOM | 1760 | HG23 | THR | 114 | -11.776 | 12.542 | 13.562 | 1.00 | 0.00 | H |
| ATOM | 1761 | N    | VAL | 115 | -8.430  | 12.568 | 13.518 | 1.00 | 0.00 | N |
| ATOM | 1762 | CA   | VAL | 115 | -7.971  | 13.659 | 14.395 | 1.00 | 0.00 | C |
| ATOM | 1763 | C    | VAL | 115 | -9.042  | 14.763 | 14.392 | 1.00 | 0.00 | C |



|      |      |      |     |     |         |        |        |      |      |   |
|------|------|------|-----|-----|---------|--------|--------|------|------|---|
| ATOM | 1764 | O    | VAL | 115 | -9.504  | 15.149 | 13.321 | 1.00 | 0.00 | O |
| ATOM | 1765 | CB   | VAL | 115 | -6.580  | 14.185 | 13.983 | 1.00 | 0.00 | C |
| ATOM | 1766 | CG1  | VAL | 115 | -6.059  | 15.217 | 14.993 | 1.00 | 0.00 | C |
| ATOM | 1767 | CG2  | VAL | 115 | -5.550  | 13.042 | 13.892 | 1.00 | 0.00 | C |
| ATOM | 1768 | H    | VAL | 115 | -8.201  | 12.626 | 12.533 | 1.00 | 0.00 | H |
| ATOM | 1769 | HA   | VAL | 115 | -7.866  | 13.255 | 15.399 | 1.00 | 0.00 | H |
| ATOM | 1770 | HB   | VAL | 115 | -6.657  | 14.665 | 13.008 | 1.00 | 0.00 | H |
| ATOM | 1771 | HG11 | VAL | 115 | -5.983  | 14.770 | 15.986 | 1.00 | 0.00 | H |
| ATOM | 1772 | HG12 | VAL | 115 | -5.076  | 15.581 | 14.690 | 1.00 | 0.00 | H |
| ATOM | 1773 | HG13 | VAL | 115 | -6.739  | 16.063 | 15.032 | 1.00 | 0.00 | H |
| ATOM | 1774 | HG21 | VAL | 115 | -5.825  | 12.344 | 13.100 | 1.00 | 0.00 | H |
| ATOM | 1775 | HG22 | VAL | 115 | -4.564  | 13.442 | 13.663 | 1.00 | 0.00 | H |
| ATOM | 1776 | HG23 | VAL | 115 | -5.504  | 12.504 | 14.840 | 1.00 | 0.00 | H |
| ATOM | 1777 | N    | SER | 116 | -9.473  | 15.231 | 15.570 | 1.00 | 0.00 | N |
| ATOM | 1778 | CA   | SER | 116 | -10.779 | 15.913 | 15.756 | 1.00 | 0.00 | C |
| ATOM | 1779 | C    | SER | 116 | -10.892 | 16.964 | 16.882 | 1.00 | 0.00 | C |
| ATOM | 1780 | O    | SER | 116 | -10.079 | 16.967 | 17.830 | 1.00 | 0.00 | O |
| ATOM | 1781 | CB   | SER | 116 | -11.839 | 14.839 | 16.011 | 1.00 | 0.00 | C |
| ATOM | 1782 | OG   | SER | 116 | -13.118 | 15.436 | 15.997 | 1.00 | 0.00 | O |
| ATOM | 1783 | OXT  | SER | 116 | -11.880 | 17.726 | 16.809 | 1.00 | 0.00 | O |
| ATOM | 1784 | H    | SER | 116 | -9.031  | 14.880 | 16.412 | 1.00 | 0.00 | H |
| ATOM | 1785 | HA   | SER | 116 | -11.047 | 16.434 | 14.840 | 1.00 | 0.00 | H |
| ATOM | 1786 | HB2  | SER | 116 | -11.788 | 14.069 | 15.242 | 1.00 | 0.00 | H |
| ATOM | 1787 | HB3  | SER | 116 | -11.658 | 14.385 | 16.987 | 1.00 | 0.00 | H |
| ATOM | 1788 | HG   | SER | 116 | -12.982 | 16.336 | 16.355 | 1.00 | 0.00 | H |
| ATOM | 1789 | N    | ASP | 117 | 13.304  | 12.537 | 0.629  | 1.00 | 0.00 | N |
| ATOM | 1790 | CA   | ASP | 117 | 14.163  | 13.003 | -0.498 | 1.00 | 0.00 | C |
| ATOM | 1791 | C    | ASP | 117 | 13.638  | 12.586 | -1.885 | 1.00 | 0.00 | C |
| ATOM | 1792 | O    | ASP | 117 | 13.133  | 13.424 | -2.615 | 1.00 | 0.00 | O |
| ATOM | 1793 | CB   | ASP | 117 | 15.633  | 12.578 | -0.258 | 1.00 | 0.00 | C |
| ATOM | 1794 | CG   | ASP | 117 | 15.866  | 12.412 | 1.234  | 1.00 | 0.00 | C |
| ATOM | 1795 | OD1  | ASP | 117 | 15.465  | 11.308 | 1.668  | 1.00 | 0.00 | O |
| ATOM | 1796 | OD2  | ASP | 117 | 15.911  | 13.442 | 1.929  | 1.00 | 0.00 | O |
| ATOM | 1797 | HA   | ASP | 117 | 14.148  | 14.094 | -0.498 | 1.00 | 0.00 | H |
| ATOM | 1798 | HB2  | ASP | 117 | 15.841  | 11.623 | -0.743 | 1.00 | 0.00 | H |
| ATOM | 1799 | HB3  | ASP | 117 | 16.308  | 13.330 | -0.667 | 1.00 | 0.00 | H |
| ATOM | 1800 | H1   | ASP | 117 | 12.351  | 12.325 | 0.363  | 1.00 | 0.00 | H |
| ATOM | 1801 | H2   | ASP | 117 | 13.355  | 13.225 | 1.373  | 1.00 | 0.00 | H |
| ATOM | 1802 | H3   | ASP | 117 | 13.775  | 11.745 | 1.083  | 1.00 | 0.00 | H |
| ATOM | 1803 | N    | ILE | 118 | 13.723  | 11.300 | -2.230 | 1.00 | 0.00 | N |
| ATOM | 1804 | CA   | ILE | 118 | 13.326  | 10.794 | -3.558 | 1.00 | 0.00 | C |
| ATOM | 1805 | C    | ILE | 118 | 11.805  | 10.840 | -3.816 | 1.00 | 0.00 | C |
| ATOM | 1806 | O    | ILE | 118 | 11.000  | 10.454 | -2.962 | 1.00 | 0.00 | O |
| ATOM | 1807 | CB   | ILE | 118 | 13.932  | 9.392  | -3.757 | 1.00 | 0.00 | C |
| ATOM | 1808 | CG1  | ILE | 118 | 13.993  | 8.990  | -5.241 | 1.00 | 0.00 | C |
| ATOM | 1809 | CG2  | ILE | 118 | 13.168  | 8.354  | -2.917 | 1.00 | 0.00 | C |
| ATOM | 1810 | CD1  | ILE | 118 | 14.913  | 7.785  | -5.447 | 1.00 | 0.00 | C |
| ATOM | 1811 | H    | ILE | 118 | 14.150  | 10.654 | -1.587 | 1.00 | 0.00 | H |
| ATOM | 1812 | HA   | ILE | 118 | 13.780  | 11.458 | -4.296 | 1.00 | 0.00 | H |
| ATOM | 1813 | HB   | ILE | 118 | 14.963  | 9.427  | -3.393 | 1.00 | 0.00 | H |
| ATOM | 1814 | HG12 | ILE | 118 | 12.994  | 8.760  | -5.612 | 1.00 | 0.00 | H |
| ATOM | 1815 | HG13 | ILE | 118 | 14.393  | 9.818  | -5.826 | 1.00 | 0.00 | H |
| ATOM | 1816 | HG21 | ILE | 118 | 12.206  | 8.134  | -3.377 | 1.00 | 0.00 | H |
| ATOM | 1817 | HG22 | ILE | 118 | 13.739  | 7.434  | -2.825 | 1.00 | 0.00 | H |
| ATOM | 1818 | HG23 | ILE | 118 | 12.975  | 8.763  | -1.930 | 1.00 | 0.00 | H |
| ATOM | 1819 | HD11 | ILE | 118 | 14.621  | 6.959  | -4.812 | 1.00 | 0.00 | H |
| ATOM | 1820 | HD12 | ILE | 118 | 14.874  | 7.466  | -6.488 | 1.00 | 0.00 | H |

|      |      |      |     |     |        |        |         |      |      |   |
|------|------|------|-----|-----|--------|--------|---------|------|------|---|
| ATOM | 1821 | HD13 | ILE | 118 | 15.929 | 8.057  | -5.171  | 1.00 | 0.00 | H |
| ATOM | 1822 | N    | GLU | 119 | 11.447 | 11.273 | -5.024  | 1.00 | 0.00 | N |
| ATOM | 1823 | CA   | GLU | 119 | 10.092 | 11.386 | -5.563  | 1.00 | 0.00 | C |
| ATOM | 1824 | C    | GLU | 119 | 9.635  | 10.053 | -6.177  | 1.00 | 0.00 | C |
| ATOM | 1825 | O    | GLU | 119 | 10.471 | 9.240  | -6.586  | 1.00 | 0.00 | O |
| ATOM | 1826 | CB   | GLU | 119 | 10.149 | 12.455 | -6.660  | 1.00 | 0.00 | C |
| ATOM | 1827 | CG   | GLU | 119 | 8.810  | 12.992 | -7.185  | 1.00 | 0.00 | C |
| ATOM | 1828 | CD   | GLU | 119 | 9.022  | 13.819 | -8.458  | 1.00 | 0.00 | C |
| ATOM | 1829 | OE1  | GLU | 119 | 8.038  | 13.931 | -9.221  | 1.00 | 0.00 | O |
| ATOM | 1830 | OE2  | GLU | 119 | 10.162 | 14.288 | -8.668  | 1.00 | 0.00 | O |
| ATOM | 1831 | H    | GLU | 119 | 12.183 | 11.488 | -5.687  | 1.00 | 0.00 | H |
| ATOM | 1832 | HA   | GLU | 119 | 9.407  | 11.698 | -4.774  | 1.00 | 0.00 | H |
| ATOM | 1833 | HB2  | GLU | 119 | 10.727 | 13.307 | -6.291  | 1.00 | 0.00 | H |
| ATOM | 1834 | HB3  | GLU | 119 | 10.676 | 12.009 | -7.501  | 1.00 | 0.00 | H |
| ATOM | 1835 | HG2  | GLU | 119 | 8.143  | 12.169 | -7.429  | 1.00 | 0.00 | H |
| ATOM | 1836 | HG3  | GLU | 119 | 8.340  | 13.608 | -6.419  | 1.00 | 0.00 | H |
| ATOM | 1837 | N    | LEU | 120 | 8.316  | 9.857  | -6.292  | 1.00 | 0.00 | N |
| ATOM | 1838 | CA   | LEU | 120 | 7.695  | 8.709  | -6.957  | 1.00 | 0.00 | C |
| ATOM | 1839 | C    | LEU | 120 | 6.325  | 9.103  | -7.556  | 1.00 | 0.00 | C |
| ATOM | 1840 | O    | LEU | 120 | 5.284  | 8.956  | -6.908  | 1.00 | 0.00 | O |
| ATOM | 1841 | CB   | LEU | 120 | 7.613  | 7.561  | -5.928  | 1.00 | 0.00 | C |
| ATOM | 1842 | CG   | LEU | 120 | 7.306  | 6.181  | -6.535  | 1.00 | 0.00 | C |
| ATOM | 1843 | CD1  | LEU | 120 | 8.459  | 5.678  | -7.419  | 1.00 | 0.00 | C |
| ATOM | 1844 | CD2  | LEU | 120 | 7.061  | 5.185  | -5.392  | 1.00 | 0.00 | C |
| ATOM | 1845 | H    | LEU | 120 | 7.695  | 10.571 | -5.945  | 1.00 | 0.00 | H |
| ATOM | 1846 | HA   | LEU | 120 | 8.344  | 8.406  | -7.780  | 1.00 | 0.00 | H |
| ATOM | 1847 | HB2  | LEU | 120 | 8.559  | 7.495  | -5.392  | 1.00 | 0.00 | H |
| ATOM | 1848 | HB3  | LEU | 120 | 6.843  | 7.808  | -5.195  | 1.00 | 0.00 | H |
| ATOM | 1849 | HG   | LEU | 120 | 6.404  | 6.251  | -7.141  | 1.00 | 0.00 | H |
| ATOM | 1850 | HD11 | LEU | 120 | 9.388  | 5.653  | -6.857  | 1.00 | 0.00 | H |
| ATOM | 1851 | HD12 | LEU | 120 | 8.243  | 4.671  | -7.763  | 1.00 | 0.00 | H |
| ATOM | 1852 | HD13 | LEU | 120 | 8.578  | 6.317  | -8.292  | 1.00 | 0.00 | H |
| ATOM | 1853 | HD21 | LEU | 120 | 6.149  | 5.452  | -4.872  | 1.00 | 0.00 | H |
| ATOM | 1854 | HD22 | LEU | 120 | 6.953  | 4.175  | -5.787  | 1.00 | 0.00 | H |
| ATOM | 1855 | HD23 | LEU | 120 | 7.880  | 5.210  | -4.681  | 1.00 | 0.00 | H |
| ATOM | 1856 | N    | THR | 121 | 6.336  | 9.647  | -8.782  | 1.00 | 0.00 | N |
| ATOM | 1857 | CA   | THR | 121 | 5.135  | 10.106 | -9.508  | 1.00 | 0.00 | C |
| ATOM | 1858 | C    | THR | 121 | 4.621  | 9.047  | -10.480 | 1.00 | 0.00 | C |
| ATOM | 1859 | O    | THR | 121 | 5.331  | 8.104  | -10.828 | 1.00 | 0.00 | O |
| ATOM | 1860 | CB   | THR | 121 | 5.372  | 11.473 | -10.161 | 1.00 | 0.00 | C |
| ATOM | 1861 | CG2  | THR | 121 | 6.340  | 11.442 | -11.341 | 1.00 | 0.00 | C |
| ATOM | 1862 | OG1  | THR | 121 | 4.131  | 11.961 | -10.613 | 1.00 | 0.00 | O |
| ATOM | 1863 | H    | THR | 121 | 7.224  | 9.682  | -9.272  | 1.00 | 0.00 | H |
| ATOM | 1864 | HA   | THR | 121 | 4.342  | 10.259 | -8.776  | 1.00 | 0.00 | H |
| ATOM | 1865 | HB   | THR | 121 | 5.762  | 12.159 | -9.405  | 1.00 | 0.00 | H |
| ATOM | 1866 | HG1  | THR | 121 | 4.270  | 12.884 | -10.848 | 1.00 | 0.00 | H |
| ATOM | 1867 | HG21 | THR | 121 | 5.936  | 10.839 | -12.153 | 1.00 | 0.00 | H |
| ATOM | 1868 | HG22 | THR | 121 | 6.504  | 12.462 | -11.694 | 1.00 | 0.00 | H |
| ATOM | 1869 | HG23 | THR | 121 | 7.299  | 11.036 | -11.020 | 1.00 | 0.00 | H |
| ATOM | 1870 | N    | GLN | 122 | 3.363  | 9.169  | -10.898 | 1.00 | 0.00 | N |
| ATOM | 1871 | CA   | GLN | 122 | 2.645  | 8.177  | -11.697 | 1.00 | 0.00 | C |
| ATOM | 1872 | C    | GLN | 122 | 1.752  | 8.875  | -12.730 | 1.00 | 0.00 | C |
| ATOM | 1873 | O    | GLN | 122 | 1.318  | 10.008 | -12.530 | 1.00 | 0.00 | O |
| ATOM | 1874 | CB   | GLN | 122 | 1.785  | 7.267  | -10.796 | 1.00 | 0.00 | C |
| ATOM | 1875 | CG   | GLN | 122 | 2.587  | 6.351  | -9.853  | 1.00 | 0.00 | C |
| ATOM | 1876 | CD   | GLN | 122 | 1.658  | 5.461  | -9.022  | 1.00 | 0.00 | C |
| ATOM | 1877 | NE2  | GLN | 122 | 1.077  | 4.432  | -9.600  | 1.00 | 0.00 | N |

|      |      |      |     |     |        |        |         |      |      |   |
|------|------|------|-----|-----|--------|--------|---------|------|------|---|
| ATOM | 1878 | OE1  | GLN | 122 | 1.411  | 5.702  | -7.850  | 1.00 | 0.00 | O |
| ATOM | 1879 | H    | GLN | 122 | 2.904  | 10.056 | -10.726 | 1.00 | 0.00 | H |
| ATOM | 1880 | HA   | GLN | 122 | 3.363  | 7.567  | -12.242 | 1.00 | 0.00 | H |
| ATOM | 1881 | HB2  | GLN | 122 | 1.119  | 7.890  | -10.198 | 1.00 | 0.00 | H |
| ATOM | 1882 | HB3  | GLN | 122 | 1.169  | 6.632  | -11.436 | 1.00 | 0.00 | H |
| ATOM | 1883 | HG2  | GLN | 122 | 3.252  | 5.717  | -10.440 | 1.00 | 0.00 | H |
| ATOM | 1884 | HG3  | GLN | 122 | 3.191  | 6.951  | -9.172  | 1.00 | 0.00 | H |
| ATOM | 1885 | HE21 | GLN | 122 | 0.416  | 3.908  | -9.035  | 1.00 | 0.00 | H |
| ATOM | 1886 | HE22 | GLN | 122 | 1.241  | 4.226  | -10.569 | 1.00 | 0.00 | H |
| ATOM | 1887 | N    | SER | 123 | 1.436  | 8.187  | -13.829 | 1.00 | 0.00 | N |
| ATOM | 1888 | CA   | SER | 123 | 0.513  | 8.679  | -14.862 | 1.00 | 0.00 | C |
| ATOM | 1889 | C    | SER | 123 | 0.016  | 7.557  | -15.798 | 1.00 | 0.00 | C |
| ATOM | 1890 | O    | SER | 123 | 0.786  | 6.632  | -16.090 | 1.00 | 0.00 | O |
| ATOM | 1891 | CB   | SER | 123 | 1.150  | 9.807  | -15.683 | 1.00 | 0.00 | C |
| ATOM | 1892 | OG   | SER | 123 | 1.007  | 11.024 | -14.978 | 1.00 | 0.00 | O |
| ATOM | 1893 | H    | SER | 123 | 1.841  | 7.261  | -13.974 | 1.00 | 0.00 | H |
| ATOM | 1894 | HA   | SER | 123 | -0.330 | 9.118  | -14.340 | 1.00 | 0.00 | H |
| ATOM | 1895 | HB2  | SER | 123 | 2.203  | 9.587  | -15.862 | 1.00 | 0.00 | H |
| ATOM | 1896 | HB3  | SER | 123 | 0.640  | 9.902  | -16.642 | 1.00 | 0.00 | H |
| ATOM | 1897 | HG   | SER | 123 | 1.212  | 10.843 | -14.035 | 1.00 | 0.00 | H |
| ATOM | 1898 | N    | PRO | 124 | -1.239 | 7.628  | -16.303 | 1.00 | 0.00 | N |
| ATOM | 1899 | CA   | PRO | 124 | -2.319 | 8.552  | -15.917 | 1.00 | 0.00 | C |
| ATOM | 1900 | C    | PRO | 124 | -2.673 | 8.473  | -14.425 | 1.00 | 0.00 | C |
| ATOM | 1901 | O    | PRO | 124 | -2.223 | 7.553  | -13.751 | 1.00 | 0.00 | O |
| ATOM | 1902 | CB   | PRO | 124 | -3.534 | 8.147  | -16.767 | 1.00 | 0.00 | C |
| ATOM | 1903 | CG   | PRO | 124 | -2.916 | 7.441  | -17.970 | 1.00 | 0.00 | C |
| ATOM | 1904 | CD   | PRO | 124 | -1.714 | 6.735  | -17.350 | 1.00 | 0.00 | C |
| ATOM | 1905 | HA   | PRO | 124 | -2.026 | 9.570  | -16.175 | 1.00 | 0.00 | H |
| ATOM | 1906 | HB2  | PRO | 124 | -4.153 | 7.433  | -16.221 | 1.00 | 0.00 | H |
| ATOM | 1907 | HB3  | PRO | 124 | -4.125 | 9.013  | -17.066 | 1.00 | 0.00 | H |
| ATOM | 1908 | HG2  | PRO | 124 | -3.612 | 6.739  | -18.431 | 1.00 | 0.00 | H |
| ATOM | 1909 | HG3  | PRO | 124 | -2.575 | 8.181  | -18.697 | 1.00 | 0.00 | H |
| ATOM | 1910 | HD2  | PRO | 124 | -2.027 | 5.791  | -16.902 | 1.00 | 0.00 | H |
| ATOM | 1911 | HD3  | PRO | 124 | -0.947 | 6.554  | -18.105 | 1.00 | 0.00 | H |
| ATOM | 1912 | N    | ALA | 125 | -3.455 | 9.427  | -13.901 | 1.00 | 0.00 | N |
| ATOM | 1913 | CA   | ALA | 125 | -3.866 | 9.474  | -12.482 | 1.00 | 0.00 | C |
| ATOM | 1914 | C    | ALA | 125 | -5.268 | 8.879  | -12.223 | 1.00 | 0.00 | C |
| ATOM | 1915 | O    | ALA | 125 | -5.583 | 8.456  | -11.116 | 1.00 | 0.00 | O |
| ATOM | 1916 | CB   | ALA | 125 | -3.795 | 10.932 | -12.020 | 1.00 | 0.00 | C |
| ATOM | 1917 | H    | ALA | 125 | -3.771 | 10.173 | -14.502 | 1.00 | 0.00 | H |
| ATOM | 1918 | HA   | ALA | 125 | -3.165 | 8.895  | -11.876 | 1.00 | 0.00 | H |
| ATOM | 1919 | HB1  | ALA | 125 | -4.505 | 11.547 | -12.578 | 1.00 | 0.00 | H |
| ATOM | 1920 | HB2  | ALA | 125 | -4.041 | 10.988 | -10.957 | 1.00 | 0.00 | H |
| ATOM | 1921 | HB3  | ALA | 125 | -2.784 | 11.319 | -12.162 | 1.00 | 0.00 | H |
| ATOM | 1922 | N    | ILE | 126 | -6.091 | 8.810  | -13.268 | 1.00 | 0.00 | N |
| ATOM | 1923 | CA   | ILE | 126 | -7.317 | 8.017  | -13.376 | 1.00 | 0.00 | C |
| ATOM | 1924 | C    | ILE | 126 | -7.298 | 7.469  | -14.811 | 1.00 | 0.00 | C |
| ATOM | 1925 | O    | ILE | 126 | -6.763 | 8.137  | -15.705 | 1.00 | 0.00 | O |
| ATOM | 1926 | CB   | ILE | 126 | -8.586 | 8.860  | -13.053 | 1.00 | 0.00 | C |
| ATOM | 1927 | CG1  | ILE | 126 | -8.502 | 9.493  | -11.641 | 1.00 | 0.00 | C |
| ATOM | 1928 | CG2  | ILE | 126 | -9.861 | 7.999  | -13.181 | 1.00 | 0.00 | C |
| ATOM | 1929 | CD1  | ILE | 126 | -9.719 | 10.321 | -11.207 | 1.00 | 0.00 | C |
| ATOM | 1930 | H    | ILE | 126 | -5.728 | 9.116  | -14.159 | 1.00 | 0.00 | H |
| ATOM | 1931 | HA   | ILE | 126 | -7.263 | 7.178  | -12.683 | 1.00 | 0.00 | H |
| ATOM | 1932 | HB   | ILE | 126 | -8.653 | 9.668  | -13.782 | 1.00 | 0.00 | H |
| ATOM | 1933 | HG12 | ILE | 126 | -8.342 | 8.707  | -10.901 | 1.00 | 0.00 | H |
| ATOM | 1934 | HG13 | ILE | 126 | -7.647 | 10.166 | -11.607 | 1.00 | 0.00 | H |

|      |      |      |     |     |         |        |         |      |      |   |
|------|------|------|-----|-----|---------|--------|---------|------|------|---|
| ATOM | 1935 | HG21 | ILE | 126 | -9.848  | 7.190  | -12.453 | 1.00 | 0.00 | H |
| ATOM | 1936 | HG22 | ILE | 126 | -10.751 | 8.607  | -13.018 | 1.00 | 0.00 | H |
| ATOM | 1937 | HG23 | ILE | 126 | -9.951  | 7.584  | -14.182 | 1.00 | 0.00 | H |
| ATOM | 1938 | HD11 | ILE | 126 | -10.580 | 9.674  | -11.033 | 1.00 | 0.00 | H |
| ATOM | 1939 | HD12 | ILE | 126 | -9.485  | 10.833 | -10.272 | 1.00 | 0.00 | H |
| ATOM | 1940 | HD13 | ILE | 126 | -9.957  | 11.062 | -11.969 | 1.00 | 0.00 | H |
| ATOM | 1941 | N    | MET | 127 | -7.834  | 6.272  | -15.053 | 1.00 | 0.00 | N |
| ATOM | 1942 | CA   | MET | 127 | -7.898  | 5.663  | -16.387 | 1.00 | 0.00 | C |
| ATOM | 1943 | C    | MET | 127 | -9.236  | 4.954  | -16.609 | 1.00 | 0.00 | C |
| ATOM | 1944 | O    | MET | 127 | -9.679  | 4.179  | -15.766 | 1.00 | 0.00 | O |
| ATOM | 1945 | CB   | MET | 127 | -6.718  | 4.691  | -16.551 | 1.00 | 0.00 | C |
| ATOM | 1946 | CG   | MET | 127 | -6.647  | 4.104  | -17.967 | 1.00 | 0.00 | C |
| ATOM | 1947 | SD   | MET | 127 | -5.433  | 2.784  | -18.181 | 1.00 | 0.00 | S |
| ATOM | 1948 | CE   | MET | 127 | -3.874  | 3.690  | -18.023 | 1.00 | 0.00 | C |
| ATOM | 1949 | H    | MET | 127 | -8.229  | 5.753  | -14.272 | 1.00 | 0.00 | H |
| ATOM | 1950 | HA   | MET | 127 | -7.801  | 6.445  | -17.141 | 1.00 | 0.00 | H |
| ATOM | 1951 | HB2  | MET | 127 | -5.790  | 5.224  | -16.341 | 1.00 | 0.00 | H |
| ATOM | 1952 | HB3  | MET | 127 | -6.820  | 3.881  | -15.828 | 1.00 | 0.00 | H |
| ATOM | 1953 | HG2  | MET | 127 | -7.617  | 3.670  | -18.219 | 1.00 | 0.00 | H |
| ATOM | 1954 | HG3  | MET | 127 | -6.432  | 4.898  | -18.683 | 1.00 | 0.00 | H |
| ATOM | 1955 | HE1  | MET | 127 | -3.858  | 4.244  | -17.086 | 1.00 | 0.00 | H |
| ATOM | 1956 | HE2  | MET | 127 | -3.045  | 2.983  | -18.033 | 1.00 | 0.00 | H |
| ATOM | 1957 | HE3  | MET | 127 | -3.757  | 4.372  | -18.865 | 1.00 | 0.00 | H |
| ATOM | 1958 | N    | SER | 128 | -9.867  | 5.198  | -17.756 | 1.00 | 0.00 | N |
| ATOM | 1959 | CA   | SER | 128 | -11.071 | 4.495  | -18.200 | 1.00 | 0.00 | C |
| ATOM | 1960 | C    | SER | 128 | -10.708 | 3.437  | -19.260 | 1.00 | 0.00 | C |
| ATOM | 1961 | O    | SER | 128 | -10.267 | 3.770  | -20.362 | 1.00 | 0.00 | O |
| ATOM | 1962 | CB   | SER | 128 | -12.095 | 5.521  | -18.718 | 1.00 | 0.00 | C |
| ATOM | 1963 | OG   | SER | 128 | -11.506 | 6.543  | -19.516 | 1.00 | 0.00 | O |
| ATOM | 1964 | H    | SER | 128 | -9.475  | 5.846  | -18.420 | 1.00 | 0.00 | H |
| ATOM | 1965 | HA   | SER | 128 | -11.534 | 3.987  | -17.361 | 1.00 | 0.00 | H |
| ATOM | 1966 | HB2  | SER | 128 | -12.874 | 5.007  | -19.287 | 1.00 | 0.00 | H |
| ATOM | 1967 | HB3  | SER | 128 | -12.564 | 5.993  | -17.853 | 1.00 | 0.00 | H |
| ATOM | 1968 | HG   | SER | 128 | -12.084 | 7.313  | -19.518 | 1.00 | 0.00 | H |
| ATOM | 1969 | N    | ALA | 129 | -10.884 | 2.149  | -18.946 | 1.00 | 0.00 | N |
| ATOM | 1970 | CA   | ALA | 129 | -10.461 | 1.027  | -19.794 | 1.00 | 0.00 | C |
| ATOM | 1971 | C    | ALA | 129 | -11.532 | -0.073 | -19.862 | 1.00 | 0.00 | C |
| ATOM | 1972 | O    | ALA | 129 | -12.120 | -0.455 | -18.859 | 1.00 | 0.00 | O |
| ATOM | 1973 | CB   | ALA | 129 | -9.138  | 0.496  | -19.241 | 1.00 | 0.00 | C |
| ATOM | 1974 | H    | ALA | 129 | -11.236 | 1.922  | -18.015 | 1.00 | 0.00 | H |
| ATOM | 1975 | HA   | ALA | 129 | -10.280 | 1.371  | -20.814 | 1.00 | 0.00 | H |
| ATOM | 1976 | HB1  | ALA | 129 | -9.261  | 0.248  | -18.188 | 1.00 | 0.00 | H |
| ATOM | 1977 | HB2  | ALA | 129 | -8.841  | -0.401 | -19.789 | 1.00 | 0.00 | H |
| ATOM | 1978 | HB3  | ALA | 129 | -8.357  | 1.251  | -19.340 | 1.00 | 0.00 | H |
| ATOM | 1979 | N    | SER | 130 | -11.843 | -0.545 | -21.067 | 1.00 | 0.00 | N |
| ATOM | 1980 | CA   | SER | 130 | -12.923 | -1.502 | -21.350 | 1.00 | 0.00 | C |
| ATOM | 1981 | C    | SER | 130 | -12.586 | -2.905 | -20.824 | 1.00 | 0.00 | C |
| ATOM | 1982 | O    | SER | 130 | -11.402 | -3.241 | -20.688 | 1.00 | 0.00 | O |
| ATOM | 1983 | CB   | SER | 130 | -13.206 | -1.598 | -22.869 | 1.00 | 0.00 | C |
| ATOM | 1984 | OG   | SER | 130 | -13.311 | -0.332 | -23.487 | 1.00 | 0.00 | O |
| ATOM | 1985 | H    | SER | 130 | -11.308 | -0.219 | -21.866 | 1.00 | 0.00 | H |
| ATOM | 1986 | HA   | SER | 130 | -13.834 | -1.160 | -20.863 | 1.00 | 0.00 | H |
| ATOM | 1987 | HB2  | SER | 130 | -12.408 | -2.155 | -23.363 | 1.00 | 0.00 | H |
| ATOM | 1988 | HB3  | SER | 130 | -14.133 | -2.142 | -23.041 | 1.00 | 0.00 | H |
| ATOM | 1989 | HG   | SER | 130 | -12.384 | -0.005 | -23.594 | 1.00 | 0.00 | H |
| ATOM | 1990 | N    | PRO | 131 | -13.594 | -3.772 | -20.610 | 1.00 | 0.00 | N |
| ATOM | 1991 | CA   | PRO | 131 | -13.337 | -5.198 | -20.481 | 1.00 | 0.00 | C |

|      |      |     |     |     |         |        |         |      |      |   |
|------|------|-----|-----|-----|---------|--------|---------|------|------|---|
| ATOM | 1992 | C   | PRO | 131 | -12.654 | -5.679 | -21.764 | 1.00 | 0.00 | C |
| ATOM | 1993 | O   | PRO | 131 | -13.138 | -5.435 | -22.873 | 1.00 | 0.00 | O |
| ATOM | 1994 | CB  | PRO | 131 | -14.694 | -5.861 | -20.240 | 1.00 | 0.00 | C |
| ATOM | 1995 | CG  | PRO | 131 | -15.688 | -4.882 | -20.868 | 1.00 | 0.00 | C |
| ATOM | 1996 | CD  | PRO | 131 | -15.031 | -3.519 | -20.657 | 1.00 | 0.00 | C |
| ATOM | 1997 | HA  | PRO | 131 | -12.683 | -5.381 | -19.628 | 1.00 | 0.00 | H |
| ATOM | 1998 | HB2 | PRO | 131 | -14.755 | -6.849 | -20.698 | 1.00 | 0.00 | H |
| ATOM | 1999 | HB3 | PRO | 131 | -14.875 | -5.930 | -19.168 | 1.00 | 0.00 | H |
| ATOM | 2000 | HG2 | PRO | 131 | -15.770 | -5.079 | -21.938 | 1.00 | 0.00 | H |
| ATOM | 2001 | HG3 | PRO | 131 | -16.668 | -4.936 | -20.391 | 1.00 | 0.00 | H |
| ATOM | 2002 | HD2 | PRO | 131 | -15.319 | -2.844 | -21.464 | 1.00 | 0.00 | H |
| ATOM | 2003 | HD3 | PRO | 131 | -15.354 | -3.099 | -19.707 | 1.00 | 0.00 | H |
| ATOM | 2004 | N   | GLY | 132 | -11.491 | -6.312 | -21.598 | 1.00 | 0.00 | N |
| ATOM | 2005 | CA  | GLY | 132 | -10.653 | -6.786 | -22.696 | 1.00 | 0.00 | C |
| ATOM | 2006 | C   | GLY | 132 | -9.671  | -5.758 | -23.271 | 1.00 | 0.00 | C |
| ATOM | 2007 | O   | GLY | 132 | -8.870  | -6.147 | -24.120 | 1.00 | 0.00 | O |
| ATOM | 2008 | H   | GLY | 132 | -11.162 | -6.471 | -20.645 | 1.00 | 0.00 | H |
| ATOM | 2009 | HA2 | GLY | 132 | -10.074 | -7.634 | -22.342 | 1.00 | 0.00 | H |
| ATOM | 2010 | HA3 | GLY | 132 | -11.297 | -7.106 | -23.516 | 1.00 | 0.00 | H |
| ATOM | 2011 | N   | GLU | 133 | -9.693  | -4.488 | -22.842 | 1.00 | 0.00 | N |
| ATOM | 2012 | CA  | GLU | 133 | -8.757  | -3.472 | -23.352 | 1.00 | 0.00 | C |
| ATOM | 2013 | C   | GLU | 133 | -7.324  | -3.689 | -22.828 | 1.00 | 0.00 | C |
| ATOM | 2014 | O   | GLU | 133 | -7.084  | -4.222 | -21.741 | 1.00 | 0.00 | O |
| ATOM | 2015 | CB  | GLU | 133 | -9.255  | -2.034 | -23.080 | 1.00 | 0.00 | C |
| ATOM | 2016 | CG  | GLU | 133 | -9.165  | -1.112 | -24.316 | 1.00 | 0.00 | C |
| ATOM | 2017 | CD  | GLU | 133 | -9.799  | 0.270  | -24.097 | 1.00 | 0.00 | C |
| ATOM | 2018 | OE1 | GLU | 133 | -9.325  | 1.292  | -24.626 | 1.00 | 0.00 | O |
| ATOM | 2019 | OE2 | GLU | 133 | -10.834 | 0.369  | -23.401 | 1.00 | 0.00 | O |
| ATOM | 2020 | H   | GLU | 133 | -10.351 | -4.230 | -22.112 | 1.00 | 0.00 | H |
| ATOM | 2021 | HA  | GLU | 133 | -8.721  | -3.604 | -24.435 | 1.00 | 0.00 | H |
| ATOM | 2022 | HB2 | GLU | 133 | -10.295 | -2.086 | -22.775 | 1.00 | 0.00 | H |
| ATOM | 2023 | HB3 | GLU | 133 | -8.683  | -1.588 | -22.263 | 1.00 | 0.00 | H |
| ATOM | 2024 | HG2 | GLU | 133 | -8.118  | -0.996 | -24.606 | 1.00 | 0.00 | H |
| ATOM | 2025 | HG3 | GLU | 133 | -9.685  | -1.595 | -25.148 | 1.00 | 0.00 | H |
| ATOM | 2026 | N   | LYS | 134 | -6.340  | -3.260 | -23.621 | 1.00 | 0.00 | N |
| ATOM | 2027 | CA  | LYS | 134 | -4.934  | -3.259 | -23.219 | 1.00 | 0.00 | C |
| ATOM | 2028 | C   | LYS | 134 | -4.642  | -2.020 | -22.354 | 1.00 | 0.00 | C |
| ATOM | 2029 | O   | LYS | 134 | -4.846  | -0.897 | -22.809 | 1.00 | 0.00 | O |
| ATOM | 2030 | CB  | LYS | 134 | -4.072  | -3.304 | -24.499 | 1.00 | 0.00 | C |
| ATOM | 2031 | CG  | LYS | 134 | -2.554  | -3.193 | -24.275 | 1.00 | 0.00 | C |
| ATOM | 2032 | CD  | LYS | 134 | -1.961  | -4.410 | -23.549 | 1.00 | 0.00 | C |
| ATOM | 2033 | CE  | LYS | 134 | -0.487  | -4.195 | -23.174 | 1.00 | 0.00 | C |
| ATOM | 2034 | NZ  | LYS | 134 | 0.394   | -4.038 | -24.358 | 1.00 | 0.00 | N |
| ATOM | 2035 | H   | LYS | 134 | -6.589  | -2.795 | -24.482 | 1.00 | 0.00 | H |
| ATOM | 2036 | HA  | LYS | 134 | -4.746  | -4.156 | -22.626 | 1.00 | 0.00 | H |
| ATOM | 2037 | HB2 | LYS | 134 | -4.286  | -4.230 | -25.036 | 1.00 | 0.00 | H |
| ATOM | 2038 | HB3 | LYS | 134 | -4.372  | -2.474 | -25.142 | 1.00 | 0.00 | H |
| ATOM | 2039 | HG2 | LYS | 134 | -2.077  | -3.101 | -25.252 | 1.00 | 0.00 | H |
| ATOM | 2040 | HG3 | LYS | 134 | -2.335  | -2.288 | -23.706 | 1.00 | 0.00 | H |
| ATOM | 2041 | HD2 | LYS | 134 | -2.517  | -4.579 | -22.630 | 1.00 | 0.00 | H |
| ATOM | 2042 | HD3 | LYS | 134 | -2.071  | -5.299 | -24.173 | 1.00 | 0.00 | H |
| ATOM | 2043 | HE2 | LYS | 134 | -0.416  | -3.305 | -22.539 | 1.00 | 0.00 | H |
| ATOM | 2044 | HE3 | LYS | 134 | -0.157  | -5.051 | -22.578 | 1.00 | 0.00 | H |
| ATOM | 2045 | HZ1 | LYS | 134 | 0.113   | -3.222 | -24.887 | 1.00 | 0.00 | H |
| ATOM | 2046 | HZ2 | LYS | 134 | 1.357   | -3.901 | -24.072 | 1.00 | 0.00 | H |
| ATOM | 2047 | HZ3 | LYS | 134 | 0.339   | -4.856 | -24.951 | 1.00 | 0.00 | H |
| ATOM | 2048 | N   | VAL | 135 | -4.083  | -2.217 | -21.157 | 1.00 | 0.00 | N |

|      |      |      |     |     |        |        |         |      |      |   |
|------|------|------|-----|-----|--------|--------|---------|------|------|---|
| ATOM | 2049 | CA   | VAL | 135 | -3.674 | -1.131 | -20.248 | 1.00 | 0.00 | C |
| ATOM | 2050 | C    | VAL | 135 | -2.158 | -1.159 | -20.057 | 1.00 | 0.00 | C |
| ATOM | 2051 | O    | VAL | 135 | -1.571 | -2.238 | -19.984 | 1.00 | 0.00 | O |
| ATOM | 2052 | CB   | VAL | 135 | -4.404 | -1.270 | -18.888 | 1.00 | 0.00 | C |
| ATOM | 2053 | CG1  | VAL | 135 | -3.813 | -0.404 | -17.762 | 1.00 | 0.00 | C |
| ATOM | 2054 | CG2  | VAL | 135 | -5.900 | -0.970 | -19.055 | 1.00 | 0.00 | C |
| ATOM | 2055 | H    | VAL | 135 | -3.919 | -3.175 | -20.843 | 1.00 | 0.00 | H |
| ATOM | 2056 | HA   | VAL | 135 | -3.938 | -0.164 | -20.677 | 1.00 | 0.00 | H |
| ATOM | 2057 | HB   | VAL | 135 | -4.313 | -2.304 | -18.575 | 1.00 | 0.00 | H |
| ATOM | 2058 | HG11 | VAL | 135 | -3.693 | 0.622  | -18.101 | 1.00 | 0.00 | H |
| ATOM | 2059 | HG12 | VAL | 135 | -4.468 | -0.424 | -16.888 | 1.00 | 0.00 | H |
| ATOM | 2060 | HG13 | VAL | 135 | -2.839 | -0.790 | -17.464 | 1.00 | 0.00 | H |
| ATOM | 2061 | HG21 | VAL | 135 | -6.344 | -1.640 | -19.792 | 1.00 | 0.00 | H |
| ATOM | 2062 | HG22 | VAL | 135 | -6.416 | -1.123 | -18.107 | 1.00 | 0.00 | H |
| ATOM | 2063 | HG23 | VAL | 135 | -6.042 | 0.061  | -19.383 | 1.00 | 0.00 | H |
| ATOM | 2064 | N    | THR | 136 | -1.555 | 0.025  | -19.898 | 1.00 | 0.00 | N |
| ATOM | 2065 | CA   | THR | 136 | -0.261 | 0.225  | -19.237 | 1.00 | 0.00 | C |
| ATOM | 2066 | C    | THR | 136 | -0.305 | 1.581  | -18.539 | 1.00 | 0.00 | C |
| ATOM | 2067 | O    | THR | 136 | -0.529 | 2.588  | -19.208 | 1.00 | 0.00 | O |
| ATOM | 2068 | CB   | THR | 136 | 0.904  | 0.182  | -20.241 | 1.00 | 0.00 | C |
| ATOM | 2069 | CG2  | THR | 136 | 2.251  | 0.431  | -19.562 | 1.00 | 0.00 | C |
| ATOM | 2070 | OG1  | THR | 136 | 0.998  | -1.082 | -20.854 | 1.00 | 0.00 | O |
| ATOM | 2071 | H    | THR | 136 | -2.105 | 0.861  | -20.062 | 1.00 | 0.00 | H |
| ATOM | 2072 | HA   | THR | 136 | -0.114 | -0.542 | -18.486 | 1.00 | 0.00 | H |
| ATOM | 2073 | HB   | THR | 136 | 0.747  | 0.940  | -21.013 | 1.00 | 0.00 | H |
| ATOM | 2074 | HG1  | THR | 136 | 1.673  | -1.595 | -20.379 | 1.00 | 0.00 | H |
| ATOM | 2075 | HG21 | THR | 136 | 2.373  | -0.232 | -18.706 | 1.00 | 0.00 | H |
| ATOM | 2076 | HG22 | THR | 136 | 3.057  | 0.261  | -20.274 | 1.00 | 0.00 | H |
| ATOM | 2077 | HG23 | THR | 136 | 2.310  | 1.465  | -19.223 | 1.00 | 0.00 | H |
| ATOM | 2078 | N    | LEU | 137 | -0.099 | 1.625  | -17.220 | 1.00 | 0.00 | N |
| ATOM | 2079 | CA   | LEU | 137 | 0.170  | 2.866  | -16.481 | 1.00 | 0.00 | C |
| ATOM | 2080 | C    | LEU | 137 | 1.604  | 2.868  | -15.946 | 1.00 | 0.00 | C |
| ATOM | 2081 | O    | LEU | 137 | 2.195  | 1.811  | -15.716 | 1.00 | 0.00 | O |
| ATOM | 2082 | CB   | LEU | 137 | -0.935 | 3.195  | -15.441 | 1.00 | 0.00 | C |
| ATOM | 2083 | CG   | LEU | 137 | -1.297 | 2.242  | -14.278 | 1.00 | 0.00 | C |
| ATOM | 2084 | CD1  | LEU | 137 | -1.805 | 0.869  | -14.735 | 1.00 | 0.00 | C |
| ATOM | 2085 | CD2  | LEU | 137 | -0.180 | 2.088  | -13.239 | 1.00 | 0.00 | C |
| ATOM | 2086 | H    | LEU | 137 | 0.085  | 0.750  | -16.739 | 1.00 | 0.00 | H |
| ATOM | 2087 | HA   | LEU | 137 | 0.153  | 3.688  | -17.198 | 1.00 | 0.00 | H |
| ATOM | 2088 | HB2  | LEU | 137 | -0.684 | 4.163  | -14.998 | 1.00 | 0.00 | H |
| ATOM | 2089 | HB3  | LEU | 137 | -1.853 | 3.359  | -16.005 | 1.00 | 0.00 | H |
| ATOM | 2090 | HG   | LEU | 137 | -2.136 | 2.709  | -13.763 | 1.00 | 0.00 | H |
| ATOM | 2091 | HD11 | LEU | 137 | -0.988 | 0.277  | -15.142 | 1.00 | 0.00 | H |
| ATOM | 2092 | HD12 | LEU | 137 | -2.232 | 0.334  | -13.886 | 1.00 | 0.00 | H |
| ATOM | 2093 | HD13 | LEU | 137 | -2.580 | 0.993  | -15.492 | 1.00 | 0.00 | H |
| ATOM | 2094 | HD21 | LEU | 137 | 0.140  | 3.066  | -12.883 | 1.00 | 0.00 | H |
| ATOM | 2095 | HD22 | LEU | 137 | -0.542 | 1.503  | -12.392 | 1.00 | 0.00 | H |
| ATOM | 2096 | HD23 | LEU | 137 | 0.674  | 1.577  | -13.674 | 1.00 | 0.00 | H |
| ATOM | 2097 | N    | THR | 138 | 2.203  | 4.054  | -15.792 | 1.00 | 0.00 | N |
| ATOM | 2098 | CA   | THR | 138 | 3.653  | 4.204  | -15.585 | 1.00 | 0.00 | C |
| ATOM | 2099 | C    | THR | 138 | 3.966  | 4.925  | -14.288 | 1.00 | 0.00 | C |
| ATOM | 2100 | O    | THR | 138 | 3.161  | 5.701  | -13.769 | 1.00 | 0.00 | O |
| ATOM | 2101 | CB   | THR | 138 | 4.279  | 4.863  | -16.821 | 1.00 | 0.00 | C |
| ATOM | 2102 | CG2  | THR | 138 | 5.761  | 5.230  | -16.717 | 1.00 | 0.00 | C |
| ATOM | 2103 | OG1  | THR | 138 | 4.203  | 3.897  | -17.839 | 1.00 | 0.00 | O |
| ATOM | 2104 | H    | THR | 138 | 1.660  | 4.897  | -15.958 | 1.00 | 0.00 | H |
| ATOM | 2105 | HA   | THR | 138 | 4.102  | 3.222  | -15.493 | 1.00 | 0.00 | H |

|      |      |      |     |     |        |        |         |      |      |   |
|------|------|------|-----|-----|--------|--------|---------|------|------|---|
| ATOM | 2106 | HB   | THR | 138 | 3.705  | 5.750  | -17.099 | 1.00 | 0.00 | H |
| ATOM | 2107 | HG1  | THR | 138 | 4.361  | 4.338  | -18.679 | 1.00 | 0.00 | H |
| ATOM | 2108 | HG21 | THR | 138 | 6.346  | 4.358  | -16.422 | 1.00 | 0.00 | H |
| ATOM | 2109 | HG22 | THR | 138 | 6.122  | 5.589  | -17.682 | 1.00 | 0.00 | H |
| ATOM | 2110 | HG23 | THR | 138 | 5.907  | 6.028  | -15.988 | 1.00 | 0.00 | H |
| ATOM | 2111 | N    | CYS | 139 | 5.153  | 4.626  | -13.770 | 1.00 | 0.00 | N |
| ATOM | 2112 | CA   | CYS | 139 | 5.758  | 5.184  | -12.572 | 1.00 | 0.00 | C |
| ATOM | 2113 | C    | CYS | 139 | 7.147  | 5.758  | -12.908 | 1.00 | 0.00 | C |
| ATOM | 2114 | O    | CYS | 139 | 7.901  | 5.143  | -13.667 | 1.00 | 0.00 | O |
| ATOM | 2115 | CB   | CYS | 139 | 5.828  | 4.032  | -11.563 | 1.00 | 0.00 | C |
| ATOM | 2116 | SG   | CYS | 139 | 6.456  | 4.604  | -9.972  | 1.00 | 0.00 | S |
| ATOM | 2117 | H    | CYS | 139 | 5.727  | 3.953  | -14.274 | 1.00 | 0.00 | H |
| ATOM | 2118 | HA   | CYS | 139 | 5.136  | 5.986  | -12.175 | 1.00 | 0.00 | H |
| ATOM | 2119 | HB2  | CYS | 139 | 4.830  | 3.623  | -11.420 | 1.00 | 0.00 | H |
| ATOM | 2120 | HB3  | CYS | 139 | 6.476  | 3.244  | -11.953 | 1.00 | 0.00 | H |
| ATOM | 2121 | HG   | CYS | 139 | 7.756  | 4.422  | -10.233 | 1.00 | 0.00 | H |
| ATOM | 2122 | N    | SER | 140 | 7.486  | 6.907  | -12.325 | 1.00 | 0.00 | N |
| ATOM | 2123 | CA   | SER | 140 | 8.800  | 7.551  | -12.438 | 1.00 | 0.00 | C |
| ATOM | 2124 | C    | SER | 140 | 9.347  | 7.882  | -11.041 | 1.00 | 0.00 | C |
| ATOM | 2125 | O    | SER | 140 | 8.656  | 8.518  | -10.245 | 1.00 | 0.00 | O |
| ATOM | 2126 | CB   | SER | 140 | 8.708  | 8.864  | -13.235 | 1.00 | 0.00 | C |
| ATOM | 2127 | OG   | SER | 140 | 8.526  | 8.649  | -14.625 | 1.00 | 0.00 | O |
| ATOM | 2128 | H    | SER | 140 | 6.826  | 7.341  | -11.683 | 1.00 | 0.00 | H |
| ATOM | 2129 | HA   | SER | 140 | 9.502  | 6.894  | -12.952 | 1.00 | 0.00 | H |
| ATOM | 2130 | HB2  | SER | 140 | 7.882  | 9.461  | -12.846 | 1.00 | 0.00 | H |
| ATOM | 2131 | HB3  | SER | 140 | 9.634  | 9.423  | -13.096 | 1.00 | 0.00 | H |
| ATOM | 2132 | HG   | SER | 140 | 8.566  | 9.504  | -15.066 | 1.00 | 0.00 | H |
| ATOM | 2133 | N    | ALA | 141 | 10.592 | 7.490  | -10.757 | 1.00 | 0.00 | N |
| ATOM | 2134 | CA   | ALA | 141 | 11.319 | 7.866  | -9.539  | 1.00 | 0.00 | C |
| ATOM | 2135 | C    | ALA | 141 | 12.430 | 8.889  | -9.845  | 1.00 | 0.00 | C |
| ATOM | 2136 | O    | ALA | 141 | 13.145 | 8.740  | -10.834 | 1.00 | 0.00 | O |
| ATOM | 2137 | CB   | ALA | 141 | 11.901 | 6.586  | -8.931  | 1.00 | 0.00 | C |
| ATOM | 2138 | H    | ALA | 141 | 11.093 | 6.934  | -11.442 | 1.00 | 0.00 | H |
| ATOM | 2139 | HA   | ALA | 141 | 10.628 | 8.313  | -8.826  | 1.00 | 0.00 | H |
| ATOM | 2140 | HB1  | ALA | 141 | 12.631 | 6.155  | -9.616  | 1.00 | 0.00 | H |
| ATOM | 2141 | HB2  | ALA | 141 | 12.393 | 6.816  | -7.987  | 1.00 | 0.00 | H |
| ATOM | 2142 | HB3  | ALA | 141 | 11.108 | 5.859  | -8.751  | 1.00 | 0.00 | H |
| ATOM | 2143 | N    | SER | 142 | 12.629 | 9.902  | -8.993  | 1.00 | 0.00 | N |
| ATOM | 2144 | CA   | SER | 142 | 13.598 | 10.987 | -9.288  | 1.00 | 0.00 | C |
| ATOM | 2145 | C    | SER | 142 | 15.081 | 10.599 | -9.149  | 1.00 | 0.00 | C |
| ATOM | 2146 | O    | SER | 142 | 15.956 | 11.362 | -9.549  | 1.00 | 0.00 | O |
| ATOM | 2147 | CB   | SER | 142 | 13.308 | 12.258 | -8.483  | 1.00 | 0.00 | C |
| ATOM | 2148 | OG   | SER | 142 | 13.441 | 12.078 | -7.079  | 1.00 | 0.00 | O |
| ATOM | 2149 | H    | SER | 142 | 12.025 | 9.995  | -8.185  | 1.00 | 0.00 | H |
| ATOM | 2150 | HA   | SER | 142 | 13.482 | 11.263 | -10.338 | 1.00 | 0.00 | H |
| ATOM | 2151 | HB2  | SER | 142 | 14.013 | 13.027 | -8.800  | 1.00 | 0.00 | H |
| ATOM | 2152 | HB3  | SER | 142 | 12.309 | 12.620 | -8.726  | 1.00 | 0.00 | H |
| ATOM | 2153 | HG   | SER | 142 | 13.662 | 12.955 | -6.738  | 1.00 | 0.00 | H |
| ATOM | 2154 | N    | SER | 143 | 15.377 | 9.397  | -8.654  | 1.00 | 0.00 | N |
| ATOM | 2155 | CA   | SER | 143 | 16.697 | 8.779  | -8.817  | 1.00 | 0.00 | C |
| ATOM | 2156 | C    | SER | 143 | 16.537 | 7.377  | -9.413  | 1.00 | 0.00 | C |
| ATOM | 2157 | O    | SER | 143 | 15.490 | 6.739  | -9.277  | 1.00 | 0.00 | O |
| ATOM | 2158 | CB   | SER | 143 | 17.488 | 8.693  | -7.499  | 1.00 | 0.00 | C |
| ATOM | 2159 | OG   | SER | 143 | 17.379 | 9.866  | -6.707  | 1.00 | 0.00 | O |
| ATOM | 2160 | H    | SER | 143 | 14.609 | 8.790  | -8.412  | 1.00 | 0.00 | H |
| ATOM | 2161 | HA   | SER | 143 | 17.286 | 9.374  | -9.515  | 1.00 | 0.00 | H |
| ATOM | 2162 | HB2  | SER | 143 | 17.137 | 7.834  | -6.932  | 1.00 | 0.00 | H |

|      |      |      |     |     |        |        |         |      |      |   |
|------|------|------|-----|-----|--------|--------|---------|------|------|---|
| ATOM | 2163 | HB3  | SER | 143 | 18.540 | 8.523  | -7.736  | 1.00 | 0.00 | H |
| ATOM | 2164 | HG   | SER | 143 | 17.983 | 9.811  | -5.965  | 1.00 | 0.00 | H |
| ATOM | 2165 | N    | SER | 144 | 17.590 | 6.864  | -10.045 | 1.00 | 0.00 | N |
| ATOM | 2166 | CA   | SER | 144 | 17.537 | 5.737  | -10.984 | 1.00 | 0.00 | C |
| ATOM | 2167 | C    | SER | 144 | 17.341 | 4.341  | -10.362 | 1.00 | 0.00 | C |
| ATOM | 2168 | O    | SER | 144 | 18.143 | 3.448  | -10.606 | 1.00 | 0.00 | O |
| ATOM | 2169 | CB   | SER | 144 | 18.773 | 5.784  | -11.899 | 1.00 | 0.00 | C |
| ATOM | 2170 | OG   | SER | 144 | 18.939 | 7.088  | -12.427 | 1.00 | 0.00 | O |
| ATOM | 2171 | H    | SER | 144 | 18.402 | 7.453  | -10.165 | 1.00 | 0.00 | H |
| ATOM | 2172 | HA   | SER | 144 | 16.680 | 5.896  | -11.635 | 1.00 | 0.00 | H |
| ATOM | 2173 | HB2  | SER | 144 | 19.663 | 5.507  | -11.330 | 1.00 | 0.00 | H |
| ATOM | 2174 | HB3  | SER | 144 | 18.638 | 5.075  | -12.718 | 1.00 | 0.00 | H |
| ATOM | 2175 | HG   | SER | 144 | 19.506 | 7.044  | -13.206 | 1.00 | 0.00 | H |
| ATOM | 2176 | N    | VAL | 145 | 16.081 | 4.063  | -9.758  | 1.00 | 0.00 | N |
| ATOM | 2177 | CA   | VAL | 145 | 16.005 | 2.851  | -8.949  | 1.00 | 0.00 | C |
| ATOM | 2178 | C    | VAL | 145 | 16.172 | 1.617  | -9.804  | 1.00 | 0.00 | C |
| ATOM | 2179 | O    | VAL | 145 | 16.310 | 1.108  | -10.804 | 1.00 | 0.00 | O |
| ATOM | 2180 | CB   | VAL | 145 | 14.631 | 2.811  | -8.169  | 1.00 | 0.00 | C |
| ATOM | 2181 | CG1  | VAL | 145 | 14.631 | 3.424  | -6.740  | 1.00 | 0.00 | C |
| ATOM | 2182 | CG2  | VAL | 145 | 13.469 | 3.510  | -8.913  | 1.00 | 0.00 | C |
| ATOM | 2183 | H    | VAL | 145 | 15.240 | 4.706  | -9.888  | 1.00 | 0.00 | H |
| ATOM | 2184 | HA   | VAL | 145 | 16.838 | 2.854  | -8.221  | 1.00 | 0.00 | H |
| ATOM | 2185 | HB   | VAL | 145 | 14.351 | 1.742  | -8.053  | 1.00 | 0.00 | H |
| ATOM | 2186 | HG11 | VAL | 145 | 14.920 | 4.492  | -6.738  | 1.00 | 0.00 | H |
| ATOM | 2187 | HG12 | VAL | 145 | 13.640 | 3.351  | -6.253  | 1.00 | 0.00 | H |
| ATOM | 2188 | HG13 | VAL | 145 | 15.324 | 2.899  | -6.055  | 1.00 | 0.00 | H |
| ATOM | 2189 | HG21 | VAL | 145 | 13.328 | 3.104  | -9.930  | 1.00 | 0.00 | H |
| ATOM | 2190 | HG22 | VAL | 145 | 12.502 | 3.368  | -8.390  | 1.00 | 0.00 | H |
| ATOM | 2191 | HG23 | VAL | 145 | 13.630 | 4.601  | -9.015  | 1.00 | 0.00 | H |
| ATOM | 2192 | N    | THR | 146 | 16.894 | 0.878  | -8.644  | 1.00 | 0.00 | N |
| ATOM | 2193 | CA   | THR | 146 | 17.408 | -0.504 | -8.733  | 1.00 | 0.00 | C |
| ATOM | 2194 | C    | THR | 146 | 16.283 | -1.498 | -8.991  | 1.00 | 0.00 | C |
| ATOM | 2195 | O    | THR | 146 | 16.404 | -2.366 | -9.847  | 1.00 | 0.00 | O |
| ATOM | 2196 | CB   | THR | 146 | 18.082 | -0.937 | -7.424  | 1.00 | 0.00 | C |
| ATOM | 2197 | CG2  | THR | 146 | 19.153 | -2.002 | -7.661  | 1.00 | 0.00 | C |
| ATOM | 2198 | OG1  | THR | 146 | 18.652 | 0.173  | -6.771  | 1.00 | 0.00 | O |
| ATOM | 2199 | H    | THR | 146 | 16.934 | 1.320  | -7.737  | 1.00 | 0.00 | H |
| ATOM | 2200 | HA   | THR | 146 | 18.105 | -0.585 | -9.567  | 1.00 | 0.00 | H |
| ATOM | 2201 | HB   | THR | 146 | 17.334 | -1.355 | -6.746  | 1.00 | 0.00 | H |
| ATOM | 2202 | HG1  | THR | 146 | 19.361 | 0.504  | -7.337  | 1.00 | 0.00 | H |
| ATOM | 2203 | HG21 | THR | 146 | 19.922 | -1.628 | -8.337  | 1.00 | 0.00 | H |
| ATOM | 2204 | HG22 | THR | 146 | 19.609 | -2.283 | -6.709  | 1.00 | 0.00 | H |
| ATOM | 2205 | HG23 | THR | 146 | 18.691 | -2.889 | -8.102  | 1.00 | 0.00 | H |
| ATOM | 2206 | N    | TYR | 147 | 15.202 | -1.355 | -8.229  | 1.00 | 0.00 | N |
| ATOM | 2207 | CA   | TYR | 147 | 14.024 | -2.213 | -8.228  | 1.00 | 0.00 | C |
| ATOM | 2208 | C    | TYR | 147 | 12.769 | -1.395 | -7.890  | 1.00 | 0.00 | C |
| ATOM | 2209 | O    | TYR | 147 | 12.867 | -0.310 | -7.304  | 1.00 | 0.00 | O |
| ATOM | 2210 | CB   | TYR | 147 | 14.194 | -3.350 | -7.204  | 1.00 | 0.00 | C |
| ATOM | 2211 | CG   | TYR | 147 | 15.171 | -4.449 | -7.570  | 1.00 | 0.00 | C |
| ATOM | 2212 | CD1  | TYR | 147 | 16.382 | -4.597 | -6.863  | 1.00 | 0.00 | C |
| ATOM | 2213 | CD2  | TYR | 147 | 14.834 | -5.369 | -8.580  | 1.00 | 0.00 | C |
| ATOM | 2214 | CE1  | TYR | 147 | 17.263 | -5.649 | -7.182  | 1.00 | 0.00 | C |
| ATOM | 2215 | CE2  | TYR | 147 | 15.710 | -6.422 | -8.906  | 1.00 | 0.00 | C |
| ATOM | 2216 | CZ   | TYR | 147 | 16.931 | -6.560 | -8.212  | 1.00 | 0.00 | C |
| ATOM | 2217 | OH   | TYR | 147 | 17.781 | -7.575 | -8.529  | 1.00 | 0.00 | O |
| ATOM | 2218 | H    | TYR | 147 | 15.173 | -0.570 | -7.597  | 1.00 | 0.00 | H |
| ATOM | 2219 | HA   | TYR | 147 | 13.907 | -2.639 | -9.218  | 1.00 | 0.00 | H |



|      |      |     |     |     |        |        |         |      |      |   |
|------|------|-----|-----|-----|--------|--------|---------|------|------|---|
| ATOM | 2220 | HB2 | TYR | 147 | 14.489 | -2.910 | -6.251  | 1.00 | 0.00 | H |
| ATOM | 2221 | HB3 | TYR | 147 | 13.226 | -3.831 | -7.055  | 1.00 | 0.00 | H |
| ATOM | 2222 | HD1 | TYR | 147 | 16.624 | -3.913 | -6.064  | 1.00 | 0.00 | H |
| ATOM | 2223 | HD2 | TYR | 147 | 13.892 | -5.281 | -9.095  | 1.00 | 0.00 | H |
| ATOM | 2224 | HE1 | TYR | 147 | 18.186 | -5.767 | -6.634  | 1.00 | 0.00 | H |
| ATOM | 2225 | HE2 | TYR | 147 | 15.444 | -7.135 | -9.673  | 1.00 | 0.00 | H |
| ATOM | 2226 | HH  | TYR | 147 | 18.547 | -7.600 | -7.956  | 1.00 | 0.00 | H |
| ATOM | 2227 | N   | MET | 148 | 11.592 | -1.938 | -8.217  | 1.00 | 0.00 | N |
| ATOM | 2228 | CA  | MET | 148 | 10.277 | -1.347 | -7.912  | 1.00 | 0.00 | C |
| ATOM | 2229 | C   | MET | 148 | 9.272  | -2.397 | -7.435  | 1.00 | 0.00 | C |
| ATOM | 2230 | O   | MET | 148 | 9.296  | -3.533 | -7.915  | 1.00 | 0.00 | O |
| ATOM | 2231 | CB  | MET | 148 | 9.715  | -0.668 | -9.172  | 1.00 | 0.00 | C |
| ATOM | 2232 | CG  | MET | 148 | 10.265 | 0.749  | -9.364  | 1.00 | 0.00 | C |
| ATOM | 2233 | SD  | MET | 148 | 9.971  | 1.936  | -8.030  | 1.00 | 0.00 | S |
| ATOM | 2234 | CE  | MET | 148 | 8.178  | 1.798  | -7.886  | 1.00 | 0.00 | C |
| ATOM | 2235 | H   | MET | 148 | 11.599 | -2.819 | -8.721  | 1.00 | 0.00 | H |
| ATOM | 2236 | HA  | MET | 148 | 10.378 | -0.607 | -7.114  | 1.00 | 0.00 | H |
| ATOM | 2237 | HB2 | MET | 148 | 9.956  | -1.272 | -10.050 | 1.00 | 0.00 | H |
| ATOM | 2238 | HB3 | MET | 148 | 8.628  | -0.612 | -9.108  | 1.00 | 0.00 | H |
| ATOM | 2239 | HG2 | MET | 148 | 11.342 | 0.684  | -9.520  | 1.00 | 0.00 | H |
| ATOM | 2240 | HG3 | MET | 148 | 9.826  | 1.159  | -10.270 | 1.00 | 0.00 | H |
| ATOM | 2241 | HE1 | MET | 148 | 7.909  | 0.799  | -7.550  | 1.00 | 0.00 | H |
| ATOM | 2242 | HE2 | MET | 148 | 7.827  | 2.513  | -7.143  | 1.00 | 0.00 | H |
| ATOM | 2243 | HE3 | MET | 148 | 7.714  | 2.005  | -8.851  | 1.00 | 0.00 | H |
| ATOM | 2244 | N   | PHE | 149 | 8.370  | -1.994 | -6.534  | 1.00 | 0.00 | N |
| ATOM | 2245 | CA  | PHE | 149 | 7.248  | -2.806 | -6.045  | 1.00 | 0.00 | C |
| ATOM | 2246 | C   | PHE | 149 | 5.893  | -2.198 | -6.420  | 1.00 | 0.00 | C |
| ATOM | 2247 | O   | PHE | 149 | 5.748  | -0.972 | -6.479  | 1.00 | 0.00 | O |
| ATOM | 2248 | CB  | PHE | 149 | 7.366  | -2.984 | -4.524  | 1.00 | 0.00 | C |
| ATOM | 2249 | CG  | PHE | 149 | 8.154  | -4.221 | -4.158  | 1.00 | 0.00 | C |
| ATOM | 2250 | CD1 | PHE | 149 | 9.546  | -4.261 | -4.364  | 1.00 | 0.00 | C |
| ATOM | 2251 | CD2 | PHE | 149 | 7.483  | -5.366 | -3.690  | 1.00 | 0.00 | C |
| ATOM | 2252 | CE1 | PHE | 149 | 10.262 | -5.442 | -4.106  | 1.00 | 0.00 | C |
| ATOM | 2253 | CE2 | PHE | 149 | 8.206  | -6.539 | -3.425  | 1.00 | 0.00 | C |
| ATOM | 2254 | CZ  | PHE | 149 | 9.595  | -6.576 | -3.625  | 1.00 | 0.00 | C |
| ATOM | 2255 | H   | PHE | 149 | 8.440  | -1.045 | -6.182  | 1.00 | 0.00 | H |
| ATOM | 2256 | HA  | PHE | 149 | 7.287  | -3.798 | -6.504  | 1.00 | 0.00 | H |
| ATOM | 2257 | HB2 | PHE | 149 | 7.836  | -2.105 | -4.081  | 1.00 | 0.00 | H |
| ATOM | 2258 | HB3 | PHE | 149 | 6.368  | -3.073 | -4.090  | 1.00 | 0.00 | H |
| ATOM | 2259 | HD1 | PHE | 149 | 10.062 | -3.392 | -4.740  | 1.00 | 0.00 | H |
| ATOM | 2260 | HD2 | PHE | 149 | 6.409  | -5.356 | -3.564  | 1.00 | 0.00 | H |
| ATOM | 2261 | HE1 | PHE | 149 | 11.328 | -5.491 | -4.277  | 1.00 | 0.00 | H |
| ATOM | 2262 | HE2 | PHE | 149 | 7.685  | -7.426 | -3.104  | 1.00 | 0.00 | H |
| ATOM | 2263 | HZ  | PHE | 149 | 10.160 | -7.484 | -3.440  | 1.00 | 0.00 | H |
| ATOM | 2264 | N   | TRP | 150 | 4.894  | -3.066 | -6.635  | 1.00 | 0.00 | N |
| ATOM | 2265 | CA  | TRP | 150 | 3.522  | -2.672 | -6.991  | 1.00 | 0.00 | C |
| ATOM | 2266 | C   | TRP | 150 | 2.450  | -3.376 | -6.142  | 1.00 | 0.00 | C |
| ATOM | 2267 | O   | TRP | 150 | 2.592  | -4.539 | -5.753  | 1.00 | 0.00 | O |
| ATOM | 2268 | CB  | TRP | 150 | 3.263  | -2.953 | -8.476  | 1.00 | 0.00 | C |
| ATOM | 2269 | CG  | TRP | 150 | 4.157  | -2.272 | -9.469  | 1.00 | 0.00 | C |
| ATOM | 2270 | CD1 | TRP | 150 | 5.354  | -2.734 | -9.892  | 1.00 | 0.00 | C |
| ATOM | 2271 | CD2 | TRP | 150 | 3.922  | -1.036 | -10.214 | 1.00 | 0.00 | C |
| ATOM | 2272 | CE2 | TRP | 150 | 5.020  | -0.832 | -11.106 | 1.00 | 0.00 | C |
| ATOM | 2273 | CE3 | TRP | 150 | 2.880  | -0.082 | -10.247 | 1.00 | 0.00 | C |
| ATOM | 2274 | NE1 | TRP | 150 | 5.870  | -1.891 | -10.854 | 1.00 | 0.00 | N |
| ATOM | 2275 | CZ2 | TRP | 150 | 5.063  | 0.250  | -12.000 | 1.00 | 0.00 | C |
| ATOM | 2276 | CZ3 | TRP | 150 | 2.914  | 1.004  | -11.142 | 1.00 | 0.00 | C |

|      |      |      |     |     |        |        |         |      |      |   |
|------|------|------|-----|-----|--------|--------|---------|------|------|---|
| ATOM | 2277 | CH2  | TRP | 150 | 3.995  | 1.164  | -12.028 | 1.00 | 0.00 | C |
| ATOM | 2278 | H    | TRP | 150 | 5.099  | -4.060 | -6.565  | 1.00 | 0.00 | H |
| ATOM | 2279 | HA   | TRP | 150 | 3.404  | -1.599 | -6.826  | 1.00 | 0.00 | H |
| ATOM | 2280 | HB2  | TRP | 150 | 3.323  | -4.027 | -8.642  | 1.00 | 0.00 | H |
| ATOM | 2281 | HB3  | TRP | 150 | 2.238  | -2.657 | -8.710  | 1.00 | 0.00 | H |
| ATOM | 2282 | HD1  | TRP | 150 | 5.828  | -3.641 | -9.542  | 1.00 | 0.00 | H |
| ATOM | 2283 | HE1  | TRP | 150 | 6.748  | -2.074 | -11.324 | 1.00 | 0.00 | H |
| ATOM | 2284 | HE3  | TRP | 150 | 2.036  | -0.197 | -9.584  | 1.00 | 0.00 | H |
| ATOM | 2285 | HZ2  | TRP | 150 | 5.893  | 0.367  | -12.678 | 1.00 | 0.00 | H |
| ATOM | 2286 | HZ3  | TRP | 150 | 2.092  | 1.707  | -11.159 | 1.00 | 0.00 | H |
| ATOM | 2287 | HH2  | TRP | 150 | 3.996  | 1.978  | -12.740 | 1.00 | 0.00 | H |
| ATOM | 2288 | N    | TYR | 151 | 1.336  | -2.670 | -5.940  | 1.00 | 0.00 | N |
| ATOM | 2289 | CA   | TYR | 151 | 0.145  | -3.135 | -5.237  | 1.00 | 0.00 | C |
| ATOM | 2290 | C    | TYR | 151 | -1.122 | -2.770 | -6.010  | 1.00 | 0.00 | C |
| ATOM | 2291 | O    | TYR | 151 | -1.195 | -1.713 | -6.641  | 1.00 | 0.00 | O |
| ATOM | 2292 | CB   | TYR | 151 | 0.051  | -2.481 | -3.853  | 1.00 | 0.00 | C |
| ATOM | 2293 | CG   | TYR | 151 | 1.322  | -2.543 | -3.040  | 1.00 | 0.00 | C |
| ATOM | 2294 | CD1  | TYR | 151 | 2.136  | -1.402 | -2.918  | 1.00 | 0.00 | C |
| ATOM | 2295 | CD2  | TYR | 151 | 1.709  | -3.754 | -2.440  | 1.00 | 0.00 | C |
| ATOM | 2296 | CE1  | TYR | 151 | 3.342  | -1.473 | -2.205  | 1.00 | 0.00 | C |
| ATOM | 2297 | CE2  | TYR | 151 | 2.939  | -3.841 | -1.762  | 1.00 | 0.00 | C |
| ATOM | 2298 | CZ   | TYR | 151 | 3.757  | -2.695 | -1.639  | 1.00 | 0.00 | C |
| ATOM | 2299 | OH   | TYR | 151 | 4.935  | -2.741 | -0.967  | 1.00 | 0.00 | O |
| ATOM | 2300 | H    | TYR | 151 | 1.321  | -1.708 | -6.261  | 1.00 | 0.00 | H |
| ATOM | 2301 | HA   | TYR | 151 | 0.195  | -4.215 | -5.115  | 1.00 | 0.00 | H |
| ATOM | 2302 | HB2  | TYR | 151 | -0.233 | -1.434 | -3.971  | 1.00 | 0.00 | H |
| ATOM | 2303 | HB3  | TYR | 151 | -0.744 | -2.978 | -3.302  | 1.00 | 0.00 | H |
| ATOM | 2304 | HD1  | TYR | 151 | 1.841  | -0.472 | -3.380  | 1.00 | 0.00 | H |
| ATOM | 2305 | HD2  | TYR | 151 | 1.061  | -4.613 | -2.501  | 1.00 | 0.00 | H |
| ATOM | 2306 | HE1  | TYR | 151 | 3.955  | -0.592 | -2.107  | 1.00 | 0.00 | H |
| ATOM | 2307 | HE2  | TYR | 151 | 3.249  | -4.773 | -1.315  | 1.00 | 0.00 | H |
| ATOM | 2308 | HH   | TYR | 151 | 5.230  | -1.854 | -0.762  | 1.00 | 0.00 | H |
| ATOM | 2309 | N    | GLN | 152 | -2.155 | -3.599 | -5.904  | 1.00 | 0.00 | N |
| ATOM | 2310 | CA   | GLN | 152 | -3.510 | -3.242 | -6.309  | 1.00 | 0.00 | C |
| ATOM | 2311 | C    | GLN | 152 | -4.328 | -3.022 | -5.032  | 1.00 | 0.00 | C |
| ATOM | 2312 | O    | GLN | 152 | -4.456 | -3.932 | -4.221  | 1.00 | 0.00 | O |
| ATOM | 2313 | CB   | GLN | 152 | -4.054 | -4.389 | -7.170  | 1.00 | 0.00 | C |
| ATOM | 2314 | CG   | GLN | 152 | -5.492 | -4.174 | -7.642  | 1.00 | 0.00 | C |
| ATOM | 2315 | CD   | GLN | 152 | -6.091 | -5.480 | -8.143  | 1.00 | 0.00 | C |
| ATOM | 2316 | NE2  | GLN | 152 | -5.941 | -5.804 | -9.411  | 1.00 | 0.00 | N |
| ATOM | 2317 | OE1  | GLN | 152 | -6.639 | -6.255 | -7.370  | 1.00 | 0.00 | O |
| ATOM | 2318 | H    | GLN | 152 | -2.038 | -4.446 | -5.355  | 1.00 | 0.00 | H |
| ATOM | 2319 | HA   | GLN | 152 | -3.513 | -2.322 | -6.899  | 1.00 | 0.00 | H |
| ATOM | 2320 | HB2  | GLN | 152 | -3.419 | -4.507 | -8.046  | 1.00 | 0.00 | H |
| ATOM | 2321 | HB3  | GLN | 152 | -4.008 | -5.312 | -6.593  | 1.00 | 0.00 | H |
| ATOM | 2322 | HG2  | GLN | 152 | -6.114 | -3.820 | -6.821  | 1.00 | 0.00 | H |
| ATOM | 2323 | HG3  | GLN | 152 | -5.492 | -3.434 | -8.440  | 1.00 | 0.00 | H |
| ATOM | 2324 | HE21 | GLN | 152 | -6.420 | -6.623 | -9.754  | 1.00 | 0.00 | H |
| ATOM | 2325 | HE22 | GLN | 152 | -5.512 | -5.149 | -10.048 | 1.00 | 0.00 | H |
| ATOM | 2326 | N    | GLN | 153 | -4.875 | -1.825 | -4.825  | 1.00 | 0.00 | N |
| ATOM | 2327 | CA   | GLN | 153 | -5.698 | -1.516 | -3.658  | 1.00 | 0.00 | C |
| ATOM | 2328 | C    | GLN | 153 | -7.098 | -1.088 | -4.107  | 1.00 | 0.00 | C |
| ATOM | 2329 | O    | GLN | 153 | -7.287 | -0.050 | -4.743  | 1.00 | 0.00 | O |
| ATOM | 2330 | CB   | GLN | 153 | -5.001 | -0.433 | -2.824  | 1.00 | 0.00 | C |
| ATOM | 2331 | CG   | GLN | 153 | -5.737 | -0.199 | -1.494  | 1.00 | 0.00 | C |
| ATOM | 2332 | CD   | GLN | 153 | -5.016 | 0.782  | -0.573  | 1.00 | 0.00 | C |
| ATOM | 2333 | NE2  | GLN | 153 | -5.486 | 0.981  | 0.638   | 1.00 | 0.00 | N |

|      |      |      |     |     |         |        |        |      |      |   |
|------|------|------|-----|-----|---------|--------|--------|------|------|---|
| ATOM | 2334 | OE1  | GLN | 153 | -4.016  | 1.387  | -0.916 | 1.00 | 0.00 | O |
| ATOM | 2335 | H    | GLN | 153 | -4.717  | -1.063 | -5.482 | 1.00 | 0.00 | H |
| ATOM | 2336 | HA   | GLN | 153 | -5.804  | -2.402 | -3.028 | 1.00 | 0.00 | H |
| ATOM | 2337 | HB2  | GLN | 153 | -3.980  | -0.755 | -2.609 | 1.00 | 0.00 | H |
| ATOM | 2338 | HB3  | GLN | 153 | -4.954  | 0.499  | -3.392 | 1.00 | 0.00 | H |
| ATOM | 2339 | HG2  | GLN | 153 | -6.737  | 0.189  | -1.693 | 1.00 | 0.00 | H |
| ATOM | 2340 | HG3  | GLN | 153 | -5.843  | -1.150 | -0.973 | 1.00 | 0.00 | H |
| ATOM | 2341 | HE21 | GLN | 153 | -5.024  | 1.674  | 1.198  | 1.00 | 0.00 | H |
| ATOM | 2342 | HE22 | GLN | 153 | -6.306  | 0.501  | 0.990  | 1.00 | 0.00 | H |
| ATOM | 2343 | N    | LYS | 154 | -8.110  | -1.877 | -3.748 | 1.00 | 0.00 | N |
| ATOM | 2344 | CA   | LYS | 154 | -9.504  | -1.459 | -3.891 | 1.00 | 0.00 | C |
| ATOM | 2345 | C    | LYS | 154 | -9.954  | -0.626 | -2.673 | 1.00 | 0.00 | C |
| ATOM | 2346 | O    | LYS | 154 | -9.429  | -0.810 | -1.570 | 1.00 | 0.00 | O |
| ATOM | 2347 | CB   | LYS | 154 | -10.379 | -2.703 | -4.134 | 1.00 | 0.00 | C |
| ATOM | 2348 | CG   | LYS | 154 | -10.235 | -3.140 | -5.599 | 1.00 | 0.00 | C |
| ATOM | 2349 | CD   | LYS | 154 | -11.011 | -4.416 | -5.936 | 1.00 | 0.00 | C |
| ATOM | 2350 | CE   | LYS | 154 | -11.027 | -4.529 | -7.464 | 1.00 | 0.00 | C |
| ATOM | 2351 | NZ   | LYS | 154 | -11.468 | -5.846 | -7.954 | 1.00 | 0.00 | N |
| ATOM | 2352 | H    | LYS | 154 | -7.925  | -2.692 | -3.174 | 1.00 | 0.00 | H |
| ATOM | 2353 | HA   | LYS | 154 | -9.581  | -0.814 | -4.765 | 1.00 | 0.00 | H |
| ATOM | 2354 | HB2  | LYS | 154 | -10.077 | -3.510 | -3.464 | 1.00 | 0.00 | H |
| ATOM | 2355 | HB3  | LYS | 154 | -11.426 | -2.462 | -3.941 | 1.00 | 0.00 | H |
| ATOM | 2356 | HG2  | LYS | 154 | -10.596 | -2.326 | -6.233 | 1.00 | 0.00 | H |
| ATOM | 2357 | HG3  | LYS | 154 | -9.182  | -3.310 | -5.823 | 1.00 | 0.00 | H |
| ATOM | 2358 | HD2  | LYS | 154 | -10.504 | -5.273 | -5.488 | 1.00 | 0.00 | H |
| ATOM | 2359 | HD3  | LYS | 154 | -12.032 | -4.350 | -5.559 | 1.00 | 0.00 | H |
| ATOM | 2360 | HE2  | LYS | 154 | -11.687 | -3.756 | -7.862 | 1.00 | 0.00 | H |
| ATOM | 2361 | HE3  | LYS | 154 | -10.022 | -4.332 | -7.849 | 1.00 | 0.00 | H |
| ATOM | 2362 | HZ1  | LYS | 154 | -12.391 | -6.097 | -7.632 | 1.00 | 0.00 | H |
| ATOM | 2363 | HZ2  | LYS | 154 | -11.451 | -5.821 | -8.970 | 1.00 | 0.00 | H |
| ATOM | 2364 | HZ3  | LYS | 154 | -10.777 | -6.545 | -7.708 | 1.00 | 0.00 | H |
| ATOM | 2365 | N    | PRO | 155 | -10.941 | 0.279  | -2.837 | 1.00 | 0.00 | N |
| ATOM | 2366 | CA   | PRO | 155 | -11.566 | 0.943  | -1.701 | 1.00 | 0.00 | C |
| ATOM | 2367 | C    | PRO | 155 | -12.249 | -0.119 | -0.841 | 1.00 | 0.00 | C |
| ATOM | 2368 | O    | PRO | 155 | -12.977 | -0.963 | -1.363 | 1.00 | 0.00 | O |
| ATOM | 2369 | CB   | PRO | 155 | -12.553 | 1.954  | -2.292 | 1.00 | 0.00 | C |
| ATOM | 2370 | CG   | PRO | 155 | -12.909 | 1.349  | -3.652 | 1.00 | 0.00 | C |
| ATOM | 2371 | CD   | PRO | 155 | -11.620 | 0.646  | -4.075 | 1.00 | 0.00 | C |
| ATOM | 2372 | HA   | PRO | 155 | -10.812 | 1.466  | -1.109 | 1.00 | 0.00 | H |
| ATOM | 2373 | HB2  | PRO | 155 | -13.433 | 2.084  | -1.662 | 1.00 | 0.00 | H |
| ATOM | 2374 | HB3  | PRO | 155 | -12.046 | 2.908  | -2.440 | 1.00 | 0.00 | H |
| ATOM | 2375 | HG2  | PRO | 155 | -13.704 | 0.612  | -3.527 | 1.00 | 0.00 | H |
| ATOM | 2376 | HG3  | PRO | 155 | -13.210 | 2.114  | -4.367 | 1.00 | 0.00 | H |
| ATOM | 2377 | HD2  | PRO | 155 | -11.861 | -0.228 | -4.684 | 1.00 | 0.00 | H |
| ATOM | 2378 | HD3  | PRO | 155 | -10.992 | 1.337  | -4.638 | 1.00 | 0.00 | H |
| ATOM | 2379 | N    | GLY | 156 | -11.964 | -0.096 | 0.463  | 1.00 | 0.00 | N |
| ATOM | 2380 | CA   | GLY | 156 | -12.436 | -1.109 | 1.410  | 1.00 | 0.00 | C |
| ATOM | 2381 | C    | GLY | 156 | -11.506 | -2.316 | 1.573  | 1.00 | 0.00 | C |
| ATOM | 2382 | O    | GLY | 156 | -11.821 | -3.192 | 2.368  | 1.00 | 0.00 | O |
| ATOM | 2383 | H    | GLY | 156 | -11.337 | 0.619  | 0.811  | 1.00 | 0.00 | H |
| ATOM | 2384 | HA2  | GLY | 156 | -12.536 | -0.655 | 2.396  | 1.00 | 0.00 | H |
| ATOM | 2385 | HA3  | GLY | 156 | -13.407 | -1.489 | 1.088  | 1.00 | 0.00 | H |
| ATOM | 2386 | N    | SER | 157 | -10.370 | -2.389 | 0.871  | 1.00 | 0.00 | N |
| ATOM | 2387 | CA   | SER | 157 | -9.355  | -3.430 | 1.091  | 1.00 | 0.00 | C |
| ATOM | 2388 | C    | SER | 157 | -7.991  | -2.860 | 1.506  | 1.00 | 0.00 | C |
| ATOM | 2389 | O    | SER | 157 | -7.719  | -1.661 | 1.418  | 1.00 | 0.00 | O |
| ATOM | 2390 | CB   | SER | 157 | -9.204  | -4.332 | -0.153 | 1.00 | 0.00 | C |

|      |      |      |     |     |         |         |        |      |      |   |
|------|------|------|-----|-----|---------|---------|--------|------|------|---|
| ATOM | 2391 | OG   | SER | 157 | -8.306  | -3.837  | -1.146 | 1.00 | 0.00 | O |
| ATOM | 2392 | H    | SER | 157 | -10.136 | -1.656  | 0.209  | 1.00 | 0.00 | H |
| ATOM | 2393 | HA   | SER | 157 | -9.678  | -4.072  | 1.915  | 1.00 | 0.00 | H |
| ATOM | 2394 | HB2  | SER | 157 | -8.835  | -5.305  | 0.174  | 1.00 | 0.00 | H |
| ATOM | 2395 | HB3  | SER | 157 | -10.187 | -4.489  | -0.600 | 1.00 | 0.00 | H |
| ATOM | 2396 | HG   | SER | 157 | -7.394  | -3.879  | -0.795 | 1.00 | 0.00 | H |
| ATOM | 2397 | N    | SER | 158 | -7.089  | -3.737  | 1.933  | 1.00 | 0.00 | N |
| ATOM | 2398 | CA   | SER | 158 | -5.664  | -3.446  | 2.020  | 1.00 | 0.00 | C |
| ATOM | 2399 | C    | SER | 158 | -4.974  | -3.585  | 0.642  | 1.00 | 0.00 | C |
| ATOM | 2400 | O    | SER | 158 | -5.620  | -4.015  | -0.329 | 1.00 | 0.00 | O |
| ATOM | 2401 | CB   | SER | 158 | -5.064  | -4.367  | 3.092  | 1.00 | 0.00 | C |
| ATOM | 2402 | OG   | SER | 158 | -5.533  | -5.709  | 2.994  | 1.00 | 0.00 | O |
| ATOM | 2403 | H    | SER | 158 | -7.321  | -4.717  | 2.028  | 1.00 | 0.00 | H |
| ATOM | 2404 | HA   | SER | 158 | -5.539  | -2.416  | 2.353  | 1.00 | 0.00 | H |
| ATOM | 2405 | HB2  | SER | 158 | -3.977  | -4.356  | 3.030  | 1.00 | 0.00 | H |
| ATOM | 2406 | HB3  | SER | 158 | -5.357  | -3.971  | 4.066  | 1.00 | 0.00 | H |
| ATOM | 2407 | HG   | SER | 158 | -5.242  | -6.148  | 3.812  | 1.00 | 0.00 | H |
| ATOM | 2408 | N    | PRO | 159 | -3.689  | -3.186  | 0.517  | 1.00 | 0.00 | N |
| ATOM | 2409 | CA   | PRO | 159 | -2.908  | -3.358  | -0.703 | 1.00 | 0.00 | C |
| ATOM | 2410 | C    | PRO | 159 | -2.639  | -4.841  | -1.009 | 1.00 | 0.00 | C |
| ATOM | 2411 | O    | PRO | 159 | -1.924  | -5.524  | -0.275 | 1.00 | 0.00 | O |
| ATOM | 2412 | CB   | PRO | 159 | -1.611  | -2.558  | -0.487 | 1.00 | 0.00 | C |
| ATOM | 2413 | CG   | PRO | 159 | -1.956  | -1.575  | 0.628  | 1.00 | 0.00 | C |
| ATOM | 2414 | CD   | PRO | 159 | -2.944  | -2.372  | 1.469  | 1.00 | 0.00 | C |
| ATOM | 2415 | HA   | PRO | 159 | -3.458  | -2.910  | -1.532 | 1.00 | 0.00 | H |
| ATOM | 2416 | HB2  | PRO | 159 | -0.802  | -3.207  | -0.150 | 1.00 | 0.00 | H |
| ATOM | 2417 | HB3  | PRO | 159 | -1.317  | -2.019  | -1.383 | 1.00 | 0.00 | H |
| ATOM | 2418 | HG2  | PRO | 159 | -1.077  | -1.278  | 1.198  | 1.00 | 0.00 | H |
| ATOM | 2419 | HG3  | PRO | 159 | -2.452  | -0.700  | 0.208  | 1.00 | 0.00 | H |
| ATOM | 2420 | HD2  | PRO | 159 | -2.398  | -3.025  | 2.150  | 1.00 | 0.00 | H |
| ATOM | 2421 | HD3  | PRO | 159 | -3.579  | -1.685  | 2.029  | 1.00 | 0.00 | H |
| ATOM | 2422 | N    | ARG | 160 | -3.183  | -5.335  | -2.129 | 1.00 | 0.00 | N |
| ATOM | 2423 | CA   | ARG | 160 | -2.889  | -6.660  | -2.692 | 1.00 | 0.00 | C |
| ATOM | 2424 | C    | ARG | 160 | -1.479  | -6.619  | -3.291 | 1.00 | 0.00 | C |
| ATOM | 2425 | O    | ARG | 160 | -1.267  | -5.941  | -4.301 | 1.00 | 0.00 | O |
| ATOM | 2426 | CB   | ARG | 160 | -3.960  | -6.971  | -3.767 | 1.00 | 0.00 | C |
| ATOM | 2427 | CG   | ARG | 160 | -3.955  | -8.351  | -4.453 | 1.00 | 0.00 | C |
| ATOM | 2428 | CD   | ARG | 160 | -4.988  | -8.327  | -5.604 | 1.00 | 0.00 | C |
| ATOM | 2429 | NE   | ARG | 160 | -5.162  | -9.629  | -6.276 | 1.00 | 0.00 | N |
| ATOM | 2430 | CZ   | ARG | 160 | -6.013  | -9.898  | -7.264 | 1.00 | 0.00 | C |
| ATOM | 2431 | NH1  | ARG | 160 | -6.817  | -9.025  | -7.826 | 1.00 | 0.00 | N |
| ATOM | 2432 | NH2  | ARG | 160 | -6.092  | -11.109 | -7.754 | 1.00 | 0.00 | N |
| ATOM | 2433 | H    | ARG | 160 | -3.764  | -4.719  | -2.690 | 1.00 | 0.00 | H |
| ATOM | 2434 | HA   | ARG | 160 | -2.939  | -7.412  | -1.905 | 1.00 | 0.00 | H |
| ATOM | 2435 | HB2  | ARG | 160 | -4.945  | -6.822  | -3.317 | 1.00 | 0.00 | H |
| ATOM | 2436 | HB3  | ARG | 160 | -3.851  | -6.239  | -4.559 | 1.00 | 0.00 | H |
| ATOM | 2437 | HG2  | ARG | 160 | -2.966  | -8.560  | -4.861 | 1.00 | 0.00 | H |
| ATOM | 2438 | HG3  | ARG | 160 | -4.221  | -9.119  | -3.726 | 1.00 | 0.00 | H |
| ATOM | 2439 | HD2  | ARG | 160 | -5.954  | -8.010  | -5.206 | 1.00 | 0.00 | H |
| ATOM | 2440 | HD3  | ARG | 160 | -4.665  | -7.594  | -6.342 | 1.00 | 0.00 | H |
| ATOM | 2441 | HE   | ARG | 160 | -4.563  | -10.393 | -5.984 | 1.00 | 0.00 | H |
| ATOM | 2442 | HH11 | ARG | 160 | -6.804  | -8.043  | -7.565 | 1.00 | 0.00 | H |
| ATOM | 2443 | HH12 | ARG | 160 | -7.427  | -9.369  | -8.570 | 1.00 | 0.00 | H |
| ATOM | 2444 | HH21 | ARG | 160 | -5.482  | -11.835 | -7.410 | 1.00 | 0.00 | H |
| ATOM | 2445 | HH22 | ARG | 160 | -6.759  | -11.274 | -8.517 | 1.00 | 0.00 | H |
| ATOM | 2446 | N    | LEU | 161 | -0.511  | -7.348  | -2.723 | 1.00 | 0.00 | N |
| ATOM | 2447 | CA   | LEU | 161 | 0.831   | -7.514  | -3.312 | 1.00 | 0.00 | C |

|      |      |      |     |     |        |         |         |      |      |   |
|------|------|------|-----|-----|--------|---------|---------|------|------|---|
| ATOM | 2448 | C    | LEU | 161 | 0.722  | -8.066  | -4.742  | 1.00 | 0.00 | C |
| ATOM | 2449 | O    | LEU | 161 | 0.149  | -9.135  | -4.941  | 1.00 | 0.00 | O |
| ATOM | 2450 | CB   | LEU | 161 | 1.679  | -8.419  | -2.394  | 1.00 | 0.00 | C |
| ATOM | 2451 | CG   | LEU | 161 | 3.133  | -8.630  | -2.881  | 1.00 | 0.00 | C |
| ATOM | 2452 | CD1  | LEU | 161 | 3.978  | -7.349  | -2.799  | 1.00 | 0.00 | C |
| ATOM | 2453 | CD2  | LEU | 161 | 3.812  | -9.737  | -2.065  | 1.00 | 0.00 | C |
| ATOM | 2454 | H    | LEU | 161 | -0.713 | -7.809  | -1.847  | 1.00 | 0.00 | H |
| ATOM | 2455 | HA   | LEU | 161 | 1.309  | -6.538  | -3.370  | 1.00 | 0.00 | H |
| ATOM | 2456 | HB2  | LEU | 161 | 1.709  | -7.991  | -1.388  | 1.00 | 0.00 | H |
| ATOM | 2457 | HB3  | LEU | 161 | 1.191  | -9.393  | -2.328  | 1.00 | 0.00 | H |
| ATOM | 2458 | HG   | LEU | 161 | 3.112  | -8.952  | -3.920  | 1.00 | 0.00 | H |
| ATOM | 2459 | HD11 | LEU | 161 | 4.031  | -7.005  | -1.766  | 1.00 | 0.00 | H |
| ATOM | 2460 | HD12 | LEU | 161 | 4.987  | -7.555  | -3.156  | 1.00 | 0.00 | H |
| ATOM | 2461 | HD13 | LEU | 161 | 3.548  | -6.565  | -3.421  | 1.00 | 0.00 | H |
| ATOM | 2462 | HD21 | LEU | 161 | 3.234  | -10.658 | -2.129  | 1.00 | 0.00 | H |
| ATOM | 2463 | HD22 | LEU | 161 | 4.812  | -9.923  | -2.457  | 1.00 | 0.00 | H |
| ATOM | 2464 | HD23 | LEU | 161 | 3.892  | -9.439  | -1.021  | 1.00 | 0.00 | H |
| ATOM | 2465 | N    | LEU | 162 | 1.232  | -7.312  | -5.724  | 1.00 | 0.00 | N |
| ATOM | 2466 | CA   | LEU | 162 | 0.983  | -7.556  | -7.148  | 1.00 | 0.00 | C |
| ATOM | 2467 | C    | LEU | 162 | 2.247  | -8.005  | -7.888  | 1.00 | 0.00 | C |
| ATOM | 2468 | O    | LEU | 162 | 2.290  | -9.090  | -8.460  | 1.00 | 0.00 | O |
| ATOM | 2469 | CB   | LEU | 162 | 0.393  | -6.261  | -7.746  | 1.00 | 0.00 | C |
| ATOM | 2470 | CG   | LEU | 162 | -0.227 | -6.441  | -9.145  | 1.00 | 0.00 | C |
| ATOM | 2471 | CD1  | LEU | 162 | -1.608 | -7.108  | -9.044  | 1.00 | 0.00 | C |
| ATOM | 2472 | CD2  | LEU | 162 | -0.354 | -5.063  | -9.805  | 1.00 | 0.00 | C |
| ATOM | 2473 | H    | LEU | 162 | 1.684  | -6.442  | -5.474  | 1.00 | 0.00 | H |
| ATOM | 2474 | HA   | LEU | 162 | 0.256  | -8.359  | -7.245  | 1.00 | 0.00 | H |
| ATOM | 2475 | HB2  | LEU | 162 | -0.377 | -5.877  | -7.074  | 1.00 | 0.00 | H |
| ATOM | 2476 | HB3  | LEU | 162 | 1.182  | -5.511  | -7.801  | 1.00 | 0.00 | H |
| ATOM | 2477 | HG   | LEU | 162 | 0.421  | -7.060  | -9.764  | 1.00 | 0.00 | H |
| ATOM | 2478 | HD11 | LEU | 162 | -2.291 | -6.482  | -8.472  | 1.00 | 0.00 | H |
| ATOM | 2479 | HD12 | LEU | 162 | -2.015 | -7.260  | -10.042 | 1.00 | 0.00 | H |
| ATOM | 2480 | HD13 | LEU | 162 | -1.524 | -8.074  | -8.548  | 1.00 | 0.00 | H |
| ATOM | 2481 | HD21 | LEU | 162 | 0.635  | -4.620  | -9.926  | 1.00 | 0.00 | H |
| ATOM | 2482 | HD22 | LEU | 162 | -0.812 | -5.163  | -10.788 | 1.00 | 0.00 | H |
| ATOM | 2483 | HD23 | LEU | 162 | -0.965 | -4.406  | -9.186  | 1.00 | 0.00 | H |
| ATOM | 2484 | N    | ILE | 163 | 3.286  | -7.168  | -7.875  | 1.00 | 0.00 | N |
| ATOM | 2485 | CA   | ILE | 163 | 4.595  | -7.444  | -8.482  | 1.00 | 0.00 | C |
| ATOM | 2486 | C    | ILE | 163 | 5.686  | -7.112  | -7.469  | 1.00 | 0.00 | C |
| ATOM | 2487 | O    | ILE | 163 | 5.666  | -6.031  | -6.875  | 1.00 | 0.00 | O |
| ATOM | 2488 | CB   | ILE | 163 | 4.764  | -6.685  | -9.825  | 1.00 | 0.00 | C |
| ATOM | 2489 | CG1  | ILE | 163 | 3.794  | -7.293  | -10.869 | 1.00 | 0.00 | C |
| ATOM | 2490 | CG2  | ILE | 163 | 6.221  | -6.708  | -10.325 | 1.00 | 0.00 | C |
| ATOM | 2491 | CD1  | ILE | 163 | 3.980  | -6.808  | -12.306 | 1.00 | 0.00 | C |
| ATOM | 2492 | H    | ILE | 163 | 3.207  | -6.329  | -7.316  | 1.00 | 0.00 | H |
| ATOM | 2493 | HA   | ILE | 163 | 4.682  | -8.507  | -8.689  | 1.00 | 0.00 | H |
| ATOM | 2494 | HB   | ILE | 163 | 4.493  | -5.641  | -9.675  | 1.00 | 0.00 | H |
| ATOM | 2495 | HG12 | ILE | 163 | 3.910  | -8.374  | -10.874 | 1.00 | 0.00 | H |
| ATOM | 2496 | HG13 | ILE | 163 | 2.771  | -7.062  | -10.572 | 1.00 | 0.00 | H |
| ATOM | 2497 | HG21 | ILE | 163 | 6.530  | -7.734  | -10.510 | 1.00 | 0.00 | H |
| ATOM | 2498 | HG22 | ILE | 163 | 6.320  | -6.131  | -11.245 | 1.00 | 0.00 | H |
| ATOM | 2499 | HG23 | ILE | 163 | 6.893  | -6.256  | -9.598  | 1.00 | 0.00 | H |
| ATOM | 2500 | HD11 | ILE | 163 | 4.901  | -7.225  | -12.715 | 1.00 | 0.00 | H |
| ATOM | 2501 | HD12 | ILE | 163 | 3.150  | -7.157  | -12.917 | 1.00 | 0.00 | H |
| ATOM | 2502 | HD13 | ILE | 163 | 4.022  | -5.720  | -12.330 | 1.00 | 0.00 | H |
| ATOM | 2503 | N    | TYR | 164 | 6.615  | -8.052  | -7.305  | 1.00 | 0.00 | N |
| ATOM | 2504 | CA   | TYR | 164 | 7.850  | -7.934  | -6.534  | 1.00 | 0.00 | C |

|      |      |      |     |     |        |         |         |      |      |   |
|------|------|------|-----|-----|--------|---------|---------|------|------|---|
| ATOM | 2505 | C    | TYR | 164 | 9.087  | -7.913  | -7.453  | 1.00 | 0.00 | C |
| ATOM | 2506 | O    | TYR | 164 | 9.068  | -8.490  | -8.543  | 1.00 | 0.00 | O |
| ATOM | 2507 | CB   | TYR | 164 | 7.925  | -9.092  | -5.519  | 1.00 | 0.00 | C |
| ATOM | 2508 | CG   | TYR | 164 | 8.301  | -10.459 | -6.066  | 1.00 | 0.00 | C |
| ATOM | 2509 | CD1  | TYR | 164 | 7.326  | -11.305 | -6.629  | 1.00 | 0.00 | C |
| ATOM | 2510 | CD2  | TYR | 164 | 9.631  | -10.911 | -5.955  | 1.00 | 0.00 | C |
| ATOM | 2511 | CE1  | TYR | 164 | 7.679  | -12.591 | -7.087  | 1.00 | 0.00 | C |
| ATOM | 2512 | CE2  | TYR | 164 | 9.992  | -12.188 | -6.418  | 1.00 | 0.00 | C |
| ATOM | 2513 | CZ   | TYR | 164 | 9.018  | -13.035 | -6.984  | 1.00 | 0.00 | C |
| ATOM | 2514 | OH   | TYR | 164 | 9.362  | -14.274 | -7.430  | 1.00 | 0.00 | O |
| ATOM | 2515 | H    | TYR | 164 | 6.559  | -8.875  | -7.894  | 1.00 | 0.00 | H |
| ATOM | 2516 | HA   | TYR | 164 | 7.832  | -6.991  | -5.988  | 1.00 | 0.00 | H |
| ATOM | 2517 | HB2  | TYR | 164 | 8.676  | -8.840  | -4.775  | 1.00 | 0.00 | H |
| ATOM | 2518 | HB3  | TYR | 164 | 6.973  | -9.169  | -4.994  | 1.00 | 0.00 | H |
| ATOM | 2519 | HD1  | TYR | 164 | 6.306  | -10.963 | -6.723  | 1.00 | 0.00 | H |
| ATOM | 2520 | HD2  | TYR | 164 | 10.386 | -10.280 | -5.505  | 1.00 | 0.00 | H |
| ATOM | 2521 | HE1  | TYR | 164 | 6.933  | -13.229 | -7.533  | 1.00 | 0.00 | H |
| ATOM | 2522 | HE2  | TYR | 164 | 11.019 | -12.515 | -6.340  | 1.00 | 0.00 | H |
| ATOM | 2523 | HH   | TYR | 164 | 8.619  | -14.744 | -7.813  | 1.00 | 0.00 | H |
| ATOM | 2524 | N    | ASP | 165 | 10.158 | -7.239  | -7.023  | 1.00 | 0.00 | N |
| ATOM | 2525 | CA   | ASP | 165 | 11.454 | -7.161  | -7.714  | 1.00 | 0.00 | C |
| ATOM | 2526 | C    | ASP | 165 | 11.306 | -6.800  | -9.205  | 1.00 | 0.00 | C |
| ATOM | 2527 | O    | ASP | 165 | 11.731 | -7.539  | -10.100 | 1.00 | 0.00 | O |
| ATOM | 2528 | CB   | ASP | 165 | 12.284 | -8.436  | -7.459  | 1.00 | 0.00 | C |
| ATOM | 2529 | CG   | ASP | 165 | 12.642 | -8.661  | -5.983  | 1.00 | 0.00 | C |
| ATOM | 2530 | OD1  | ASP | 165 | 12.520 | -7.700  | -5.185  | 1.00 | 0.00 | O |
| ATOM | 2531 | OD2  | ASP | 165 | 13.029 | -9.802  | -5.662  | 1.00 | 0.00 | O |
| ATOM | 2532 | H    | ASP | 165 | 10.133 | -6.857  | -6.087  | 1.00 | 0.00 | H |
| ATOM | 2533 | HA   | ASP | 165 | 12.010 | -6.337  | -7.264  | 1.00 | 0.00 | H |
| ATOM | 2534 | HB2  | ASP | 165 | 11.735 | -9.302  | -7.830  | 1.00 | 0.00 | H |
| ATOM | 2535 | HB3  | ASP | 165 | 13.218 | -8.359  | -8.018  | 1.00 | 0.00 | H |
| ATOM | 2536 | N    | THR | 166 | 10.636 | -5.669  | -9.470  | 1.00 | 0.00 | N |
| ATOM | 2537 | CA   | THR | 166 | 10.515 | -4.986  | -10.775 | 1.00 | 0.00 | C |
| ATOM | 2538 | C    | THR | 166 | 9.488  | -5.636  | -11.689 | 1.00 | 0.00 | C |
| ATOM | 2539 | O    | THR | 166 | 8.586  | -4.936  | -12.143 | 1.00 | 0.00 | O |
| ATOM | 2540 | CB   | THR | 166 | 11.888 | -4.805  | -11.447 | 1.00 | 0.00 | C |
| ATOM | 2541 | CG2  | THR | 166 | 11.836 | -4.455  | -12.931 | 1.00 | 0.00 | C |
| ATOM | 2542 | OG1  | THR | 166 | 12.516 | -3.736  | -10.785 | 1.00 | 0.00 | O |
| ATOM | 2543 | H    | THR | 166 | 10.198 | -5.212  | -8.677  | 1.00 | 0.00 | H |
| ATOM | 2544 | HA   | THR | 166 | 10.126 | -3.985  | -10.590 | 1.00 | 0.00 | H |
| ATOM | 2545 | HB   | THR | 166 | 12.503 | -5.695  | -11.346 | 1.00 | 0.00 | H |
| ATOM | 2546 | HG1  | THR | 166 | 13.405 | -3.660  | -11.154 | 1.00 | 0.00 | H |
| ATOM | 2547 | HG21 | THR | 166 | 11.093 | -3.680  | -13.113 | 1.00 | 0.00 | H |
| ATOM | 2548 | HG22 | THR | 166 | 12.817 | -4.135  | -13.281 | 1.00 | 0.00 | H |
| ATOM | 2549 | HG23 | THR | 166 | 11.567 | -5.341  | -13.496 | 1.00 | 0.00 | H |
| ATOM | 2550 | N    | SER | 167 | 9.593  | -6.937  | -11.972 | 1.00 | 0.00 | N |
| ATOM | 2551 | CA   | SER | 167 | 8.772  | -7.604  | -13.002 | 1.00 | 0.00 | C |
| ATOM | 2552 | C    | SER | 167 | 8.006  | -8.854  | -12.544 | 1.00 | 0.00 | C |
| ATOM | 2553 | O    | SER | 167 | 7.038  | -9.231  | -13.204 | 1.00 | 0.00 | O |
| ATOM | 2554 | CB   | SER | 167 | 9.654  | -8.020  | -14.194 | 1.00 | 0.00 | C |
| ATOM | 2555 | OG   | SER | 167 | 10.240 | -6.916  | -14.860 | 1.00 | 0.00 | O |
| ATOM | 2556 | H    | SER | 167 | 10.373 | -7.432  | -11.551 | 1.00 | 0.00 | H |
| ATOM | 2557 | HA   | SER | 167 | 8.018  | -6.915  | -13.375 | 1.00 | 0.00 | H |
| ATOM | 2558 | HB2  | SER | 167 | 10.441 | -8.686  | -13.839 | 1.00 | 0.00 | H |
| ATOM | 2559 | HB3  | SER | 167 | 9.043  | -8.561  | -14.919 | 1.00 | 0.00 | H |
| ATOM | 2560 | HG   | SER | 167 | 9.554  | -6.249  | -15.057 | 1.00 | 0.00 | H |
| ATOM | 2561 | N    | ASN | 168 | 8.407  | -9.510  | -11.454 | 1.00 | 0.00 | N |

|      |      |      |     |     |        |         |         |      |      |   |
|------|------|------|-----|-----|--------|---------|---------|------|------|---|
| ATOM | 2562 | CA   | ASN | 168 | 7.886  | -10.828 | -11.073 | 1.00 | 0.00 | C |
| ATOM | 2563 | C    | ASN | 168 | 6.519  | -10.717 | -10.367 | 1.00 | 0.00 | C |
| ATOM | 2564 | O    | ASN | 168 | 6.434  | -10.072 | -9.321  | 1.00 | 0.00 | O |
| ATOM | 2565 | CB   | ASN | 168 | 8.905  | -11.521 | -10.152 | 1.00 | 0.00 | C |
| ATOM | 2566 | CG   | ASN | 168 | 10.326 | -11.508 | -10.704 | 1.00 | 0.00 | C |
| ATOM | 2567 | ND2  | ASN | 168 | 11.141 | -10.547 | -10.307 | 1.00 | 0.00 | N |
| ATOM | 2568 | OD1  | ASN | 168 | 10.696 | -12.338 | -11.522 | 1.00 | 0.00 | O |
| ATOM | 2569 | H    | ASN | 168 | 9.139  | -9.114  | -10.876 | 1.00 | 0.00 | H |
| ATOM | 2570 | HA   | ASN | 168 | 7.773  | -11.432 | -11.975 | 1.00 | 0.00 | H |
| ATOM | 2571 | HB2  | ASN | 168 | 8.909  | -11.026 | -9.181  | 1.00 | 0.00 | H |
| ATOM | 2572 | HB3  | ASN | 168 | 8.599  | -12.556 | -9.999  | 1.00 | 0.00 | H |
| ATOM | 2573 | HD21 | ASN | 168 | 12.089 | -10.560 | -10.641 | 1.00 | 0.00 | H |
| ATOM | 2574 | HD22 | ASN | 168 | 10.867 | -9.881  | -9.596  | 1.00 | 0.00 | H |
| ATOM | 2575 | N    | LEU | 169 | 5.440  | -11.331 | -10.881 | 1.00 | 0.00 | N |
| ATOM | 2576 | CA   | LEU | 169 | 4.160  | -11.302 | -10.155 | 1.00 | 0.00 | C |
| ATOM | 2577 | C    | LEU | 169 | 4.154  | -12.206 | -8.914  | 1.00 | 0.00 | C |
| ATOM | 2578 | O    | LEU | 169 | 4.801  | -13.250 | -8.868  | 1.00 | 0.00 | O |
| ATOM | 2579 | CB   | LEU | 169 | 2.906  | -11.336 | -11.055 | 1.00 | 0.00 | C |
| ATOM | 2580 | CG   | LEU | 169 | 2.760  | -12.396 | -12.166 | 1.00 | 0.00 | C |
| ATOM | 2581 | CD1  | LEU | 169 | 2.346  | -13.771 | -11.629 | 1.00 | 0.00 | C |
| ATOM | 2582 | CD2  | LEU | 169 | 1.677  | -11.905 | -13.145 | 1.00 | 0.00 | C |
| ATOM | 2583 | H    | LEU | 169 | 5.517  | -11.855 | -11.738 | 1.00 | 0.00 | H |
| ATOM | 2584 | HA   | LEU | 169 | 4.104  | -10.306 | -9.724  | 1.00 | 0.00 | H |
| ATOM | 2585 | HB2  | LEU | 169 | 2.034  | -11.407 | -10.403 | 1.00 | 0.00 | H |
| ATOM | 2586 | HB3  | LEU | 169 | 2.864  | -10.356 | -11.533 | 1.00 | 0.00 | H |
| ATOM | 2587 | HG   | LEU | 169 | 3.698  | -12.489 | -12.712 | 1.00 | 0.00 | H |
| ATOM | 2588 | HD11 | LEU | 169 | 3.114  | -14.161 | -10.962 | 1.00 | 0.00 | H |
| ATOM | 2589 | HD12 | LEU | 169 | 1.401  | -13.693 | -11.090 | 1.00 | 0.00 | H |
| ATOM | 2590 | HD13 | LEU | 169 | 2.213  | -14.463 | -12.463 | 1.00 | 0.00 | H |
| ATOM | 2591 | HD21 | LEU | 169 | 1.581  | -12.596 | -13.982 | 1.00 | 0.00 | H |
| ATOM | 2592 | HD22 | LEU | 169 | 0.719  | -11.816 | -12.635 | 1.00 | 0.00 | H |
| ATOM | 2593 | HD23 | LEU | 169 | 1.955  | -10.927 | -13.532 | 1.00 | 0.00 | H |
| ATOM | 2594 | N    | ALA | 170 | 3.477  | -11.713 | -7.877  | 1.00 | 0.00 | N |
| ATOM | 2595 | CA   | ALA | 170 | 3.370  | -12.334 | -6.566  | 1.00 | 0.00 | C |
| ATOM | 2596 | C    | ALA | 170 | 2.224  | -13.364 | -6.506  | 1.00 | 0.00 | C |
| ATOM | 2597 | O    | ALA | 170 | 1.639  | -13.748 | -7.512  | 1.00 | 0.00 | O |
| ATOM | 2598 | CB   | ALA | 170 | 3.230  | -11.199 | -5.539  | 1.00 | 0.00 | C |
| ATOM | 2599 | H    | ALA | 170 | 2.955  | -10.858 | -8.029  | 1.00 | 0.00 | H |
| ATOM | 2600 | HA   | ALA | 170 | 4.294  | -12.878 | -6.361  | 1.00 | 0.00 | H |
| ATOM | 2601 | HB1  | ALA | 170 | 2.295  | -10.661 | -5.709  | 1.00 | 0.00 | H |
| ATOM | 2602 | HB2  | ALA | 170 | 3.237  | -11.600 | -4.526  | 1.00 | 0.00 | H |
| ATOM | 2603 | HB3  | ALA | 170 | 4.066  | -10.505 | -5.644  | 1.00 | 0.00 | H |
| ATOM | 2604 | N    | SER | 171 | 1.900  | -13.839 | -5.307  | 1.00 | 0.00 | N |
| ATOM | 2605 | CA   | SER | 171 | 1.134  | -15.077 | -5.136  | 1.00 | 0.00 | C |
| ATOM | 2606 | C    | SER | 171 | -0.355 | -14.942 | -5.484  | 1.00 | 0.00 | C |
| ATOM | 2607 | O    | SER | 171 | -0.890 | -15.747 | -6.239  | 1.00 | 0.00 | O |
| ATOM | 2608 | CB   | SER | 171 | 1.301  | -15.566 | -3.686  | 1.00 | 0.00 | C |
| ATOM | 2609 | OG   | SER | 171 | 2.563  | -15.182 | -3.152  | 1.00 | 0.00 | O |
| ATOM | 2610 | H    | SER | 171 | 2.449  | -13.551 | -4.510  | 1.00 | 0.00 | H |
| ATOM | 2611 | HA   | SER | 171 | 1.546  | -15.835 | -5.806  | 1.00 | 0.00 | H |
| ATOM | 2612 | HB2  | SER | 171 | 0.517  | -15.133 | -3.062  | 1.00 | 0.00 | H |
| ATOM | 2613 | HB3  | SER | 171 | 1.199  | -16.652 | -3.669  | 1.00 | 0.00 | H |
| ATOM | 2614 | HG   | SER | 171 | 2.755  | -15.717 | -2.375  | 1.00 | 0.00 | H |
| ATOM | 2615 | N    | GLY | 172 | -1.047 | -13.917 | -4.971  | 1.00 | 0.00 | N |
| ATOM | 2616 | CA   | GLY | 172 | -2.501 | -13.748 | -5.133  | 1.00 | 0.00 | C |
| ATOM | 2617 | C    | GLY | 172 | -2.882 | -13.041 | -6.432  | 1.00 | 0.00 | C |
| ATOM | 2618 | O    | GLY | 172 | -3.757 | -12.176 | -6.405  | 1.00 | 0.00 | O |

|      |      |      |     |     |        |         |         |      |      |   |
|------|------|------|-----|-----|--------|---------|---------|------|------|---|
| ATOM | 2619 | H    | GLY | 172 | -0.546 | -13.220 | -4.440  | 1.00 | 0.00 | H |
| ATOM | 2620 | HA2  | GLY | 172 | -2.984 | -14.727 | -5.139  | 1.00 | 0.00 | H |
| ATOM | 2621 | HA3  | GLY | 172 | -2.890 | -13.152 | -4.307  | 1.00 | 0.00 | H |
| ATOM | 2622 | N    | VAL | 173 | -2.193 | -13.360 | -7.534  | 1.00 | 0.00 | N |
| ATOM | 2623 | CA   | VAL | 173 | -2.121 | -12.495 | -8.728  | 1.00 | 0.00 | C |
| ATOM | 2624 | C    | VAL | 173 | -2.370 | -13.292 | -10.023 | 1.00 | 0.00 | C |
| ATOM | 2625 | O    | VAL | 173 | -1.777 | -14.359 | -10.194 | 1.00 | 0.00 | O |
| ATOM | 2626 | CB   | VAL | 173 | -0.756 | -11.771 | -8.819  | 1.00 | 0.00 | C |
| ATOM | 2627 | CG1  | VAL | 173 | -0.760 | -10.705 | -9.929  | 1.00 | 0.00 | C |
| ATOM | 2628 | CG2  | VAL | 173 | -0.407 | -11.080 | -7.489  | 1.00 | 0.00 | C |
| ATOM | 2629 | H    | VAL | 173 | -1.550 | -14.150 | -7.467  | 1.00 | 0.00 | H |
| ATOM | 2630 | HA   | VAL | 173 | -2.880 | -11.725 | -8.613  | 1.00 | 0.00 | H |
| ATOM | 2631 | HB   | VAL | 173 | 0.018  | -12.498 | -9.049  | 1.00 | 0.00 | H |
| ATOM | 2632 | HG11 | VAL | 173 | -1.584 | -10.008 | -9.779  | 1.00 | 0.00 | H |
| ATOM | 2633 | HG12 | VAL | 173 | 0.174  | -10.144 | -9.922  | 1.00 | 0.00 | H |
| ATOM | 2634 | HG13 | VAL | 173 | -0.866 | -11.178 | -10.904 | 1.00 | 0.00 | H |
| ATOM | 2635 | HG21 | VAL | 173 | -0.320 | -11.801 | -6.679  | 1.00 | 0.00 | H |
| ATOM | 2636 | HG22 | VAL | 173 | 0.558  | -10.593 | -7.574  | 1.00 | 0.00 | H |
| ATOM | 2637 | HG23 | VAL | 173 | -1.170 | -10.343 | -7.233  | 1.00 | 0.00 | H |
| ATOM | 2638 | N    | PRO | 174 | -3.231 | -12.799 | -10.935 | 1.00 | 0.00 | N |
| ATOM | 2639 | CA   | PRO | 174 | -3.568 | -13.455 | -12.194 | 1.00 | 0.00 | C |
| ATOM | 2640 | C    | PRO | 174 | -2.557 | -13.121 | -13.300 | 1.00 | 0.00 | C |
| ATOM | 2641 | O    | PRO | 174 | -1.943 | -12.054 | -13.314 | 1.00 | 0.00 | O |
| ATOM | 2642 | CB   | PRO | 174 | -4.965 | -12.935 | -12.548 | 1.00 | 0.00 | C |
| ATOM | 2643 | CG   | PRO | 174 | -4.910 | -11.507 | -12.015 | 1.00 | 0.00 | C |
| ATOM | 2644 | CD   | PRO | 174 | -4.083 | -11.633 | -10.749 | 1.00 | 0.00 | C |
| ATOM | 2645 | HA   | PRO | 174 | -3.609 | -14.536 | -12.055 | 1.00 | 0.00 | H |
| ATOM | 2646 | HB2  | PRO | 174 | -5.163 | -12.963 | -13.619 | 1.00 | 0.00 | H |
| ATOM | 2647 | HB3  | PRO | 174 | -5.720 | -13.502 | -12.003 | 1.00 | 0.00 | H |
| ATOM | 2648 | HG2  | PRO | 174 | -4.400 | -10.866 | -12.732 | 1.00 | 0.00 | H |
| ATOM | 2649 | HG3  | PRO | 174 | -5.888 | -11.113 | -11.770 | 1.00 | 0.00 | H |
| ATOM | 2650 | HD2  | PRO | 174 | -3.506 | -10.724 | -10.594 | 1.00 | 0.00 | H |
| ATOM | 2651 | HD3  | PRO | 174 | -4.750 | -11.811 | -9.907  | 1.00 | 0.00 | H |
| ATOM | 2652 | N    | VAL | 175 | -2.428 | -14.029 | -14.270 | 1.00 | 0.00 | N |
| ATOM | 2653 | CA   | VAL | 175 | -1.487 | -13.938 | -15.399 | 1.00 | 0.00 | C |
| ATOM | 2654 | C    | VAL | 175 | -1.965 | -12.950 | -16.471 | 1.00 | 0.00 | C |
| ATOM | 2655 | O    | VAL | 175 | -2.483 | -13.315 | -17.527 | 1.00 | 0.00 | O |
| ATOM | 2656 | CB   | VAL | 175 | -1.131 | -15.323 | -15.991 | 1.00 | 0.00 | C |
| ATOM | 2657 | CG1  | VAL | 175 | -0.154 | -16.052 | -15.052 | 1.00 | 0.00 | C |
| ATOM | 2658 | CG2  | VAL | 175 | -2.357 | -16.227 | -16.234 | 1.00 | 0.00 | C |
| ATOM | 2659 | H    | VAL | 175 | -2.966 | -14.877 | -14.183 | 1.00 | 0.00 | H |
| ATOM | 2660 | HA   | VAL | 175 | -0.559 | -13.524 | -15.001 | 1.00 | 0.00 | H |
| ATOM | 2661 | HB   | VAL | 175 | -0.615 | -15.171 | -16.941 | 1.00 | 0.00 | H |
| ATOM | 2662 | HG11 | VAL | 175 | -0.623 | -16.232 | -14.083 | 1.00 | 0.00 | H |
| ATOM | 2663 | HG12 | VAL | 175 | 0.137  | -17.007 | -15.492 | 1.00 | 0.00 | H |
| ATOM | 2664 | HG13 | VAL | 175 | 0.742  | -15.447 | -14.908 | 1.00 | 0.00 | H |
| ATOM | 2665 | HG21 | VAL | 175 | -3.081 | -15.728 | -16.878 | 1.00 | 0.00 | H |
| ATOM | 2666 | HG22 | VAL | 175 | -2.038 | -17.148 | -16.724 | 1.00 | 0.00 | H |
| ATOM | 2667 | HG23 | VAL | 175 | -2.839 | -16.482 | -15.289 | 1.00 | 0.00 | H |
| ATOM | 2668 | N    | ARG | 176 | -1.758 | -11.665 | -16.174 | 1.00 | 0.00 | N |
| ATOM | 2669 | CA   | ARG | 176 | -1.995 | -10.538 | -17.086 | 1.00 | 0.00 | C |
| ATOM | 2670 | C    | ARG | 176 | -1.108 | -9.313  | -16.818 | 1.00 | 0.00 | C |
| ATOM | 2671 | O    | ARG | 176 | -1.086 | -8.416  | -17.655 | 1.00 | 0.00 | O |
| ATOM | 2672 | CB   | ARG | 176 | -3.487 | -10.143 | -17.079 | 1.00 | 0.00 | C |
| ATOM | 2673 | CG   | ARG | 176 | -3.968 | -9.621  | -15.715 | 1.00 | 0.00 | C |
| ATOM | 2674 | CD   | ARG | 176 | -5.425 | -9.142  | -15.740 | 1.00 | 0.00 | C |
| ATOM | 2675 | NE   | ARG | 176 | -6.374 | -10.262 | -15.856 | 1.00 | 0.00 | N |



|      |      |      |     |     |        |         |         |      |      |   |
|------|------|------|-----|-----|--------|---------|---------|------|------|---|
| ATOM | 2676 | CZ   | ARG | 176 | -7.087 | -10.760 | -14.853 | 1.00 | 0.00 | C |
| ATOM | 2677 | NH1  | ARG | 176 | -7.226 | -10.151 | -13.707 | 1.00 | 0.00 | N |
| ATOM | 2678 | NH2  | ARG | 176 | -7.689 | -11.920 | -14.954 | 1.00 | 0.00 | N |
| ATOM | 2679 | H    | ARG | 176 | -1.420 | -11.479 | -15.237 | 1.00 | 0.00 | H |
| ATOM | 2680 | HA   | ARG | 176 | -1.745 | -10.883 | -18.088 | 1.00 | 0.00 | H |
| ATOM | 2681 | HB2  | ARG | 176 | -3.645 | -9.362  | -17.823 | 1.00 | 0.00 | H |
| ATOM | 2682 | HB3  | ARG | 176 | -4.088 | -11.007 | -17.370 | 1.00 | 0.00 | H |
| ATOM | 2683 | HG2  | ARG | 176 | -3.858 | -10.401 | -14.964 | 1.00 | 0.00 | H |
| ATOM | 2684 | HG3  | ARG | 176 | -3.346 | -8.778  | -15.420 | 1.00 | 0.00 | H |
| ATOM | 2685 | HD2  | ARG | 176 | -5.593 | -8.591  | -14.815 | 1.00 | 0.00 | H |
| ATOM | 2686 | HD3  | ARG | 176 | -5.581 | -8.451  | -16.568 | 1.00 | 0.00 | H |
| ATOM | 2687 | HE   | ARG | 176 | -6.479 | -10.678 | -16.762 | 1.00 | 0.00 | H |
| ATOM | 2688 | HH11 | ARG | 176 | -6.983 | -9.164  | -13.587 | 1.00 | 0.00 | H |
| ATOM | 2689 | HH12 | ARG | 176 | -7.676 | -10.650 | -12.944 | 1.00 | 0.00 | H |
| ATOM | 2690 | HH21 | ARG | 176 | -7.712 | -12.428 | -15.820 | 1.00 | 0.00 | H |
| ATOM | 2691 | HH22 | ARG | 176 | -8.188 | -12.259 | -14.138 | 1.00 | 0.00 | H |
| ATOM | 2692 | N    | PHE | 177 | -0.424 | -9.256  | -15.672 | 1.00 | 0.00 | N |
| ATOM | 2693 | CA   | PHE | 177 | 0.397  | -8.123  | -15.238 | 1.00 | 0.00 | C |
| ATOM | 2694 | C    | PHE | 177 | 1.886  | -8.285  | -15.602 | 1.00 | 0.00 | C |
| ATOM | 2695 | O    | PHE | 177 | 2.454  | -9.360  | -15.434 | 1.00 | 0.00 | O |
| ATOM | 2696 | CB   | PHE | 177 | 0.226  | -7.953  | -13.719 | 1.00 | 0.00 | C |
| ATOM | 2697 | CG   | PHE | 177 | -1.161 | -7.515  | -13.289 | 1.00 | 0.00 | C |
| ATOM | 2698 | CD1  | PHE | 177 | -2.113 | -8.446  | -12.823 | 1.00 | 0.00 | C |
| ATOM | 2699 | CD2  | PHE | 177 | -1.496 | -6.150  | -13.350 | 1.00 | 0.00 | C |
| ATOM | 2700 | CE1  | PHE | 177 | -3.393 | -8.006  | -12.438 | 1.00 | 0.00 | C |
| ATOM | 2701 | CE2  | PHE | 177 | -2.768 | -5.712  | -12.942 | 1.00 | 0.00 | C |
| ATOM | 2702 | CZ   | PHE | 177 | -3.720 | -6.642  | -12.497 | 1.00 | 0.00 | C |
| ATOM | 2703 | H    | PHE | 177 | -0.500 | -10.032 | -15.036 | 1.00 | 0.00 | H |
| ATOM | 2704 | HA   | PHE | 177 | 0.023  | -7.221  | -15.712 | 1.00 | 0.00 | H |
| ATOM | 2705 | HB2  | PHE | 177 | 0.490  | -8.880  | -13.209 | 1.00 | 0.00 | H |
| ATOM | 2706 | HB3  | PHE | 177 | 0.925  | -7.188  | -13.379 | 1.00 | 0.00 | H |
| ATOM | 2707 | HD1  | PHE | 177 | -1.866 | -9.495  | -12.766 | 1.00 | 0.00 | H |
| ATOM | 2708 | HD2  | PHE | 177 | -0.771 | -5.437  | -13.710 | 1.00 | 0.00 | H |
| ATOM | 2709 | HE1  | PHE | 177 | -4.137 | -8.707  | -12.092 | 1.00 | 0.00 | H |
| ATOM | 2710 | HE2  | PHE | 177 | -3.018 | -4.661  | -12.981 | 1.00 | 0.00 | H |
| ATOM | 2711 | HZ   | PHE | 177 | -4.705 | -6.311  | -12.202 | 1.00 | 0.00 | H |
| ATOM | 2712 | N    | SER | 178 | 2.559  | -7.206  | -16.011 | 1.00 | 0.00 | N |
| ATOM | 2713 | CA   | SER | 178 | 4.030  | -7.140  | -16.056 | 1.00 | 0.00 | C |
| ATOM | 2714 | C    | SER | 178 | 4.579  | -5.722  | -15.796 | 1.00 | 0.00 | C |
| ATOM | 2715 | O    | SER | 178 | 4.178  | -4.747  | -16.436 | 1.00 | 0.00 | O |
| ATOM | 2716 | CB   | SER | 178 | 4.586  | -7.733  | -17.364 | 1.00 | 0.00 | C |
| ATOM | 2717 | OG   | SER | 178 | 4.254  | -6.982  | -18.520 | 1.00 | 0.00 | O |
| ATOM | 2718 | H    | SER | 178 | 2.034  | -6.385  | -16.306 | 1.00 | 0.00 | H |
| ATOM | 2719 | HA   | SER | 178 | 4.409  | -7.774  | -15.254 | 1.00 | 0.00 | H |
| ATOM | 2720 | HB2  | SER | 178 | 5.674  | -7.787  | -17.285 | 1.00 | 0.00 | H |
| ATOM | 2721 | HB3  | SER | 178 | 4.203  | -8.749  | -17.480 | 1.00 | 0.00 | H |
| ATOM | 2722 | HG   | SER | 178 | 4.694  | -7.371  | -19.282 | 1.00 | 0.00 | H |
| ATOM | 2723 | N    | GLY | 179 | 5.517  | -5.598  | -14.849 | 1.00 | 0.00 | N |
| ATOM | 2724 | CA   | GLY | 179 | 6.211  | -4.344  | -14.534 | 1.00 | 0.00 | C |
| ATOM | 2725 | C    | GLY | 179 | 7.453  | -4.201  | -15.403 | 1.00 | 0.00 | C |
| ATOM | 2726 | O    | GLY | 179 | 8.446  | -4.898  | -15.205 | 1.00 | 0.00 | O |
| ATOM | 2727 | H    | GLY | 179 | 5.781  | -6.418  | -14.321 | 1.00 | 0.00 | H |
| ATOM | 2728 | HA2  | GLY | 179 | 5.553  | -3.495  | -14.715 | 1.00 | 0.00 | H |
| ATOM | 2729 | HA3  | GLY | 179 | 6.528  | -4.342  | -13.493 | 1.00 | 0.00 | H |
| ATOM | 2730 | N    | SER | 180 | 7.405  | -3.315  | -16.393 | 1.00 | 0.00 | N |
| ATOM | 2731 | CA   | SER | 180 | 8.434  | -3.243  | -17.438 | 1.00 | 0.00 | C |
| ATOM | 2732 | C    | SER | 180 | 9.261  | -1.959  | -17.299 | 1.00 | 0.00 | C |

|      |      |      |     |     |        |        |         |      |      |   |
|------|------|------|-----|-----|--------|--------|---------|------|------|---|
| ATOM | 2733 | O    | SER | 180 | 8.742  | -0.866 | -17.542 | 1.00 | 0.00 | O |
| ATOM | 2734 | CB   | SER | 180 | 7.771  | -3.344 | -18.821 | 1.00 | 0.00 | C |
| ATOM | 2735 | OG   | SER | 180 | 6.898  | -4.461 | -18.874 | 1.00 | 0.00 | O |
| ATOM | 2736 | H    | SER | 180 | 6.548  | -2.781 | -16.519 | 1.00 | 0.00 | H |
| ATOM | 2737 | HA   | SER | 180 | 9.116  | -4.091 | -17.363 | 1.00 | 0.00 | H |
| ATOM | 2738 | HB2  | SER | 180 | 7.191  | -2.448 | -19.024 | 1.00 | 0.00 | H |
| ATOM | 2739 | HB3  | SER | 180 | 8.541  | -3.444 | -19.589 | 1.00 | 0.00 | H |
| ATOM | 2740 | HG   | SER | 180 | 6.192  | -4.316 | -18.232 | 1.00 | 0.00 | H |
| ATOM | 2741 | N    | GLY | 181 | 10.526 | -2.068 | -16.871 | 1.00 | 0.00 | N |
| ATOM | 2742 | CA   | GLY | 181 | 11.429 | -0.927 | -16.678 | 1.00 | 0.00 | C |
| ATOM | 2743 | C    | GLY | 181 | 12.765 | -1.280 | -16.028 | 1.00 | 0.00 | C |
| ATOM | 2744 | O    | GLY | 181 | 13.000 | -2.435 | -15.682 | 1.00 | 0.00 | O |
| ATOM | 2745 | H    | GLY | 181 | 10.890 | -2.975 | -16.609 | 1.00 | 0.00 | H |
| ATOM | 2746 | HA2  | GLY | 181 | 11.609 | -0.436 | -17.634 | 1.00 | 0.00 | H |
| ATOM | 2747 | HA3  | GLY | 181 | 10.940 | -0.200 | -16.042 | 1.00 | 0.00 | H |
| ATOM | 2748 | N    | SER | 182 | 13.620 | -0.275 | -15.842 | 1.00 | 0.00 | N |
| ATOM | 2749 | CA   | SER | 182 | 14.961 | -0.387 | -15.245 | 1.00 | 0.00 | C |
| ATOM | 2750 | C    | SER | 182 | 15.606 | 1.004  | -15.183 | 1.00 | 0.00 | C |
| ATOM | 2751 | O    | SER | 182 | 15.844 | 1.610  | -16.227 | 1.00 | 0.00 | O |
| ATOM | 2752 | CB   | SER | 182 | 15.866 | -1.365 | -16.018 | 1.00 | 0.00 | C |
| ATOM | 2753 | OG   | SER | 182 | 17.027 | -1.671 | -15.264 | 1.00 | 0.00 | O |
| ATOM | 2754 | H    | SER | 182 | 13.297 | 0.665  | -16.061 | 1.00 | 0.00 | H |
| ATOM | 2755 | HA   | SER | 182 | 14.865 | -0.780 | -14.234 | 1.00 | 0.00 | H |
| ATOM | 2756 | HB2  | SER | 182 | 15.340 | -2.298 | -16.213 | 1.00 | 0.00 | H |
| ATOM | 2757 | HB3  | SER | 182 | 16.151 | -0.924 | -16.975 | 1.00 | 0.00 | H |
| ATOM | 2758 | HG   | SER | 182 | 17.456 | -2.437 | -15.659 | 1.00 | 0.00 | H |
| ATOM | 2759 | N    | GLY | 183 | 15.852 | 1.524  | -13.975 | 1.00 | 0.00 | N |
| ATOM | 2760 | CA   | GLY | 183 | 16.373 | 2.879  | -13.750 | 1.00 | 0.00 | C |
| ATOM | 2761 | C    | GLY | 183 | 15.313 | 3.968  | -13.956 | 1.00 | 0.00 | C |
| ATOM | 2762 | O    | GLY | 183 | 15.078 | 4.396  | -15.084 | 1.00 | 0.00 | O |
| ATOM | 2763 | H    | GLY | 183 | 15.717 | 0.927  | -13.170 | 1.00 | 0.00 | H |
| ATOM | 2764 | HA2  | GLY | 183 | 16.775 | 2.944  | -12.740 | 1.00 | 0.00 | H |
| ATOM | 2765 | HA3  | GLY | 183 | 17.176 | 3.074  | -14.463 | 1.00 | 0.00 | H |
| ATOM | 2766 | N    | THR | 184 | 14.698 | 4.452  | -12.866 | 1.00 | 0.00 | N |
| ATOM | 2767 | CA   | THR | 184 | 13.709 | 5.561  | -12.814 | 1.00 | 0.00 | C |
| ATOM | 2768 | C    | THR | 184 | 12.356 | 5.199  | -13.422 | 1.00 | 0.00 | C |
| ATOM | 2769 | O    | THR | 184 | 11.350 | 5.373  | -12.742 | 1.00 | 0.00 | O |
| ATOM | 2770 | CB   | THR | 184 | 14.274 | 6.874  | -13.407 | 1.00 | 0.00 | C |
| ATOM | 2771 | CG2  | THR | 184 | 13.233 | 7.890  | -13.895 | 1.00 | 0.00 | C |
| ATOM | 2772 | OG1  | THR | 184 | 15.026 | 7.497  | -12.396 | 1.00 | 0.00 | O |
| ATOM | 2773 | H    | THR | 184 | 14.956 | 4.033  | -11.986 | 1.00 | 0.00 | H |
| ATOM | 2774 | HA   | THR | 184 | 13.496 | 5.762  | -11.767 | 1.00 | 0.00 | H |
| ATOM | 2775 | HB   | THR | 184 | 14.937 | 6.664  | -14.244 | 1.00 | 0.00 | H |
| ATOM | 2776 | HG1  | THR | 184 | 14.403 | 7.957  | -11.802 | 1.00 | 0.00 | H |
| ATOM | 2777 | HG21 | THR | 184 | 12.444 | 8.020  | -13.157 | 1.00 | 0.00 | H |
| ATOM | 2778 | HG22 | THR | 184 | 13.716 | 8.850  | -14.076 | 1.00 | 0.00 | H |
| ATOM | 2779 | HG23 | THR | 184 | 12.791 | 7.547  | -14.829 | 1.00 | 0.00 | H |
| ATOM | 2780 | N    | SER | 185 | 12.303 | 4.743  | -14.672 | 1.00 | 0.00 | N |
| ATOM | 2781 | CA   | SER | 185 | 11.051 | 4.490  | -15.403 | 1.00 | 0.00 | C |
| ATOM | 2782 | C    | SER | 185 | 10.644 | 3.013  | -15.358 | 1.00 | 0.00 | C |
| ATOM | 2783 | O    | SER | 185 | 11.433 | 2.129  | -15.705 | 1.00 | 0.00 | O |
| ATOM | 2784 | CB   | SER | 185 | 11.173 | 4.938  | -16.865 | 1.00 | 0.00 | C |
| ATOM | 2785 | OG   | SER | 185 | 9.906  | 4.856  | -17.502 | 1.00 | 0.00 | O |
| ATOM | 2786 | H    | SER | 185 | 13.181 | 4.535  | -15.138 | 1.00 | 0.00 | H |
| ATOM | 2787 | HA   | SER | 185 | 10.242 | 5.071  | -14.956 | 1.00 | 0.00 | H |
| ATOM | 2788 | HB2  | SER | 185 | 11.528 | 5.969  | -16.898 | 1.00 | 0.00 | H |
| ATOM | 2789 | HB3  | SER | 185 | 11.890 | 4.298  | -17.381 | 1.00 | 0.00 | H |

|      |      |      |     |     |        |        |         |      |      |   |
|------|------|------|-----|-----|--------|--------|---------|------|------|---|
| ATOM | 2790 | HG   | SER | 185 | 10.018 | 4.973  | -18.450 | 1.00 | 0.00 | H |
| ATOM | 2791 | N    | TYR | 186 | 9.389  | 2.768  | -14.959 | 1.00 | 0.00 | N |
| ATOM | 2792 | CA   | TYR | 186 | 8.774  | 1.452  | -14.785 | 1.00 | 0.00 | C |
| ATOM | 2793 | C    | TYR | 186 | 7.283  | 1.476  | -15.154 | 1.00 | 0.00 | C |
| ATOM | 2794 | O    | TYR | 186 | 6.515  | 2.279  | -14.624 | 1.00 | 0.00 | O |
| ATOM | 2795 | CB   | TYR | 186 | 8.947  | 1.011  | -13.323 | 1.00 | 0.00 | C |
| ATOM | 2796 | CG   | TYR | 186 | 10.374 | 0.687  | -12.939 | 1.00 | 0.00 | C |
| ATOM | 2797 | CD1  | TYR | 186 | 11.224 | 1.677  | -12.400 | 1.00 | 0.00 | C |
| ATOM | 2798 | CD2  | TYR | 186 | 10.844 | -0.626 | -13.110 | 1.00 | 0.00 | C |
| ATOM | 2799 | CE1  | TYR | 186 | 12.535 | 1.351  | -12.002 | 1.00 | 0.00 | C |
| ATOM | 2800 | CE2  | TYR | 186 | 12.157 | -0.945 | -12.732 | 1.00 | 0.00 | C |
| ATOM | 2801 | CZ   | TYR | 186 | 12.996 | 0.027  | -12.166 | 1.00 | 0.00 | C |
| ATOM | 2802 | OH   | TYR | 186 | 14.244 | -0.352 | -11.793 | 1.00 | 0.00 | O |
| ATOM | 2803 | H    | TYR | 186 | 8.819  | 3.566  | -14.694 | 1.00 | 0.00 | H |
| ATOM | 2804 | HA   | TYR | 186 | 9.266  | 0.732  | -15.433 | 1.00 | 0.00 | H |
| ATOM | 2805 | HB2  | TYR | 186 | 8.566  | 1.793  | -12.665 | 1.00 | 0.00 | H |
| ATOM | 2806 | HB3  | TYR | 186 | 8.341  | 0.121  | -13.158 | 1.00 | 0.00 | H |
| ATOM | 2807 | HD1  | TYR | 186 | 10.862 | 2.691  | -12.287 | 1.00 | 0.00 | H |
| ATOM | 2808 | HD2  | TYR | 186 | 10.206 | -1.388 | -13.535 | 1.00 | 0.00 | H |
| ATOM | 2809 | HE1  | TYR | 186 | 13.175 | 2.106  | -11.573 | 1.00 | 0.00 | H |
| ATOM | 2810 | HE2  | TYR | 186 | 12.540 | -1.939 | -12.876 | 1.00 | 0.00 | H |
| ATOM | 2811 | HH   | TYR | 186 | 14.762 | 0.327  | -11.350 | 1.00 | 0.00 | H |
| ATOM | 2812 | N    | SER | 187 | 6.850  | 0.582  | -16.038 | 1.00 | 0.00 | N |
| ATOM | 2813 | CA   | SER | 187 | 5.492  | 0.578  | -16.602 | 1.00 | 0.00 | C |
| ATOM | 2814 | C    | SER | 187 | 4.704  | -0.699 | -16.248 | 1.00 | 0.00 | C |
| ATOM | 2815 | O    | SER | 187 | 5.040  | -1.795 | -16.696 | 1.00 | 0.00 | O |
| ATOM | 2816 | CB   | SER | 187 | 5.597  | 0.808  | -18.120 | 1.00 | 0.00 | C |
| ATOM | 2817 | OG   | SER | 187 | 6.389  | -0.158 | -18.789 | 1.00 | 0.00 | O |
| ATOM | 2818 | H    | SER | 187 | 7.532  | -0.045 | -16.453 | 1.00 | 0.00 | H |
| ATOM | 2819 | HA   | SER | 187 | 4.918  | 1.417  | -16.216 | 1.00 | 0.00 | H |
| ATOM | 2820 | HB2  | SER | 187 | 4.599  | 0.808  | -18.544 | 1.00 | 0.00 | H |
| ATOM | 2821 | HB3  | SER | 187 | 6.033  | 1.791  | -18.292 | 1.00 | 0.00 | H |
| ATOM | 2822 | HG   | SER | 187 | 7.282  | -0.182 | -18.402 | 1.00 | 0.00 | H |
| ATOM | 2823 | N    | LEU | 188 | 3.638  | -0.575 | -15.442 | 1.00 | 0.00 | N |
| ATOM | 2824 | CA   | LEU | 188 | 2.752  | -1.682 | -15.067 | 1.00 | 0.00 | C |
| ATOM | 2825 | C    | LEU | 188 | 1.758  | -1.938 | -16.202 | 1.00 | 0.00 | C |
| ATOM | 2826 | O    | LEU | 188 | 0.767  | -1.224 | -16.383 | 1.00 | 0.00 | O |
| ATOM | 2827 | CB   | LEU | 188 | 2.090  | -1.354 | -13.712 | 1.00 | 0.00 | C |
| ATOM | 2828 | CG   | LEU | 188 | 1.221  | -2.426 | -13.016 | 1.00 | 0.00 | C |
| ATOM | 2829 | CD1  | LEU | 188 | -0.152 | -2.642 | -13.671 | 1.00 | 0.00 | C |
| ATOM | 2830 | CD2  | LEU | 188 | 1.958  | -3.763 | -12.876 | 1.00 | 0.00 | C |
| ATOM | 2831 | H    | LEU | 188 | 3.331  | 0.360  | -15.183 | 1.00 | 0.00 | H |
| ATOM | 2832 | HA   | LEU | 188 | 3.354  | -2.581 | -14.940 | 1.00 | 0.00 | H |
| ATOM | 2833 | HB2  | LEU | 188 | 2.896  | -1.126 | -13.024 | 1.00 | 0.00 | H |
| ATOM | 2834 | HB3  | LEU | 188 | 1.492  | -0.453 | -13.826 | 1.00 | 0.00 | H |
| ATOM | 2835 | HG   | LEU | 188 | 1.027  | -2.057 | -12.008 | 1.00 | 0.00 | H |
| ATOM | 2836 | HD11 | LEU | 188 | -0.050 | -3.177 | -14.613 | 1.00 | 0.00 | H |
| ATOM | 2837 | HD12 | LEU | 188 | -0.785 | -3.220 | -13.000 | 1.00 | 0.00 | H |
| ATOM | 2838 | HD13 | LEU | 188 | -0.631 | -1.681 | -13.848 | 1.00 | 0.00 | H |
| ATOM | 2839 | HD21 | LEU | 188 | 2.911  | -3.602 | -12.371 | 1.00 | 0.00 | H |
| ATOM | 2840 | HD22 | LEU | 188 | 1.361  | -4.455 | -12.284 | 1.00 | 0.00 | H |
| ATOM | 2841 | HD23 | LEU | 188 | 2.139  | -4.209 | -13.855 | 1.00 | 0.00 | H |
| ATOM | 2842 | N    | THR | 189 | 2.043  | -2.970 | -16.993 | 1.00 | 0.00 | N |
| ATOM | 2843 | CA   | THR | 189 | 1.230  | -3.398 | -18.134 | 1.00 | 0.00 | C |
| ATOM | 2844 | C    | THR | 189 | 0.212  | -4.429 | -17.681 | 1.00 | 0.00 | C |
| ATOM | 2845 | O    | THR | 189 | 0.572  | -5.372 | -16.986 | 1.00 | 0.00 | O |
| ATOM | 2846 | CB   | THR | 189 | 2.151  | -3.942 | -19.223 | 1.00 | 0.00 | C |

|      |      |      |     |     |        |         |         |      |      |   |
|------|------|------|-----|-----|--------|---------|---------|------|------|---|
| ATOM | 2847 | CG2  | THR | 189 | 1.388  | -4.557  | -20.390 | 1.00 | 0.00 | C |
| ATOM | 2848 | OG1  | THR | 189 | 2.863  | -2.839  | -19.738 | 1.00 | 0.00 | O |
| ATOM | 2849 | H    | THR | 189 | 2.877  | -3.510  | -16.778 | 1.00 | 0.00 | H |
| ATOM | 2850 | HA   | THR | 189 | 0.688  | -2.546  | -18.534 | 1.00 | 0.00 | H |
| ATOM | 2851 | HB   | THR | 189 | 2.842  | -4.683  | -18.811 | 1.00 | 0.00 | H |
| ATOM | 2852 | HG1  | THR | 189 | 3.584  | -2.646  | -19.120 | 1.00 | 0.00 | H |
| ATOM | 2853 | HG21 | THR | 189 | 0.616  | -3.861  | -20.712 | 1.00 | 0.00 | H |
| ATOM | 2854 | HG22 | THR | 189 | 2.080  | -4.754  | -21.209 | 1.00 | 0.00 | H |
| ATOM | 2855 | HG23 | THR | 189 | 0.931  | -5.498  | -20.080 | 1.00 | 0.00 | H |
| ATOM | 2856 | N    | ILE | 190 | -1.043 | -4.281  | -18.114 | 1.00 | 0.00 | N |
| ATOM | 2857 | CA   | ILE | 190 | -2.111 | -5.289  | -18.001 | 1.00 | 0.00 | C |
| ATOM | 2858 | C    | ILE | 190 | -2.537 | -5.728  | -19.411 | 1.00 | 0.00 | C |
| ATOM | 2859 | O    | ILE | 190 | -3.029 | -4.916  | -20.208 | 1.00 | 0.00 | O |
| ATOM | 2860 | CB   | ILE | 190 | -3.350 | -4.794  | -17.214 | 1.00 | 0.00 | C |
| ATOM | 2861 | CG1  | ILE | 190 | -3.014 | -3.839  | -16.047 | 1.00 | 0.00 | C |
| ATOM | 2862 | CG2  | ILE | 190 | -4.131 | -6.028  | -16.730 | 1.00 | 0.00 | C |
| ATOM | 2863 | CD1  | ILE | 190 | -4.241 | -3.333  | -15.277 | 1.00 | 0.00 | C |
| ATOM | 2864 | H    | ILE | 190 | -1.247 | -3.459  | -18.674 | 1.00 | 0.00 | H |
| ATOM | 2865 | HA   | ILE | 190 | -1.709 | -6.146  | -17.466 | 1.00 | 0.00 | H |
| ATOM | 2866 | HB   | ILE | 190 | -4.000 | -4.262  | -17.902 | 1.00 | 0.00 | H |
| ATOM | 2867 | HG12 | ILE | 190 | -2.338 | -4.336  | -15.356 | 1.00 | 0.00 | H |
| ATOM | 2868 | HG13 | ILE | 190 | -2.503 | -2.960  | -16.440 | 1.00 | 0.00 | H |
| ATOM | 2869 | HG21 | ILE | 190 | -3.572 | -6.533  | -15.942 | 1.00 | 0.00 | H |
| ATOM | 2870 | HG22 | ILE | 190 | -5.106 | -5.731  | -16.342 | 1.00 | 0.00 | H |
| ATOM | 2871 | HG23 | ILE | 190 | -4.302 | -6.720  | -17.555 | 1.00 | 0.00 | H |
| ATOM | 2872 | HD11 | ILE | 190 | -4.723 | -4.148  | -14.736 | 1.00 | 0.00 | H |
| ATOM | 2873 | HD12 | ILE | 190 | -3.924 | -2.579  | -14.556 | 1.00 | 0.00 | H |
| ATOM | 2874 | HD13 | ILE | 190 | -4.955 | -2.884  | -15.969 | 1.00 | 0.00 | H |
| ATOM | 2875 | N    | SER | 191 | -2.313 | -7.003  | -19.735 | 1.00 | 0.00 | N |
| ATOM | 2876 | CA   | SER | 191 | -2.427 | -7.551  | -21.093 | 1.00 | 0.00 | C |
| ATOM | 2877 | C    | SER | 191 | -3.845 | -7.460  | -21.670 | 1.00 | 0.00 | C |
| ATOM | 2878 | O    | SER | 191 | -3.992 | -6.987  | -22.798 | 1.00 | 0.00 | O |
| ATOM | 2879 | CB   | SER | 191 | -1.893 | -8.994  | -21.134 | 1.00 | 0.00 | C |
| ATOM | 2880 | OG   | SER | 191 | -2.638 | -9.867  | -20.302 | 1.00 | 0.00 | O |
| ATOM | 2881 | H    | SER | 191 | -1.915 | -7.611  | -19.022 | 1.00 | 0.00 | H |
| ATOM | 2882 | HA   | SER | 191 | -1.798 | -6.954  | -21.747 | 1.00 | 0.00 | H |
| ATOM | 2883 | HB2  | SER | 191 | -1.934 | -9.357  | -22.162 | 1.00 | 0.00 | H |
| ATOM | 2884 | HB3  | SER | 191 | -0.851 | -8.997  | -20.808 | 1.00 | 0.00 | H |
| ATOM | 2885 | HG   | SER | 191 | -2.213 | -10.735 | -20.286 | 1.00 | 0.00 | H |
| ATOM | 2886 | N    | ARG | 192 | -4.857 | -7.841  | -20.883 | 1.00 | 0.00 | N |
| ATOM | 2887 | CA   | ARG | 192 | -6.273 | -7.522  | -21.080 | 1.00 | 0.00 | C |
| ATOM | 2888 | C    | ARG | 192 | -6.901 | -7.314  | -19.702 | 1.00 | 0.00 | C |
| ATOM | 2889 | O    | ARG | 192 | -6.735 | -8.177  | -18.836 | 1.00 | 0.00 | O |
| ATOM | 2890 | CB   | ARG | 192 | -7.029 | -8.649  | -21.799 | 1.00 | 0.00 | C |
| ATOM | 2891 | CG   | ARG | 192 | -6.621 | -8.819  | -23.266 | 1.00 | 0.00 | C |
| ATOM | 2892 | CD   | ARG | 192 | -7.640 | -9.696  | -23.999 | 1.00 | 0.00 | C |
| ATOM | 2893 | NE   | ARG | 192 | -7.215 | -9.957  | -25.386 | 1.00 | 0.00 | N |
| ATOM | 2894 | CZ   | ARG | 192 | -6.696 | -11.080 | -25.871 | 1.00 | 0.00 | C |
| ATOM | 2895 | NH1  | ARG | 192 | -6.536 | -12.153 | -25.122 | 1.00 | 0.00 | N |
| ATOM | 2896 | NH2  | ARG | 192 | -6.322 | -11.131 | -27.132 | 1.00 | 0.00 | N |
| ATOM | 2897 | H    | ARG | 192 | -4.616 | -8.246  | -19.987 | 1.00 | 0.00 | H |
| ATOM | 2898 | HA   | ARG | 192 | -6.365 | -6.603  | -21.660 | 1.00 | 0.00 | H |
| ATOM | 2899 | HB2  | ARG | 192 | -6.878 | -9.592  | -21.271 | 1.00 | 0.00 | H |
| ATOM | 2900 | HB3  | ARG | 192 | -8.093 | -8.411  | -21.761 | 1.00 | 0.00 | H |
| ATOM | 2901 | HG2  | ARG | 192 | -6.586 | -7.843  | -23.754 | 1.00 | 0.00 | H |
| ATOM | 2902 | HG3  | ARG | 192 | -5.634 | -9.281  | -23.317 | 1.00 | 0.00 | H |
| ATOM | 2903 | HD2  | ARG | 192 | -7.777 | -10.629 | -23.448 | 1.00 | 0.00 | H |

|      |      |      |     |     |         |         |         |      |      |   |
|------|------|------|-----|-----|---------|---------|---------|------|------|---|
| ATOM | 2904 | HD3  | ARG | 192 | -8.600  | -9.177  | -24.015 | 1.00 | 0.00 | H |
| ATOM | 2905 | HE   | ARG | 192 | -7.330  | -9.182  | -26.022 | 1.00 | 0.00 | H |
| ATOM | 2906 | HH11 | ARG | 192 | -6.826  | -12.134 | -24.160 | 1.00 | 0.00 | H |
| ATOM | 2907 | HH12 | ARG | 192 | -6.153  | -12.998 | -25.510 | 1.00 | 0.00 | H |
| ATOM | 2908 | HH21 | ARG | 192 | -6.407  | -10.311 | -27.713 | 1.00 | 0.00 | H |
| ATOM | 2909 | HH22 | ARG | 192 | -5.929  | -11.972 | -27.518 | 1.00 | 0.00 | H |
| ATOM | 2910 | N    | MET | 193 | -7.560  | -6.175  | -19.490 | 1.00 | 0.00 | N |
| ATOM | 2911 | CA   | MET | 193 | -8.233  | -5.844  | -18.227 | 1.00 | 0.00 | C |
| ATOM | 2912 | C    | MET | 193 | -9.475  | -6.723  | -18.003 | 1.00 | 0.00 | C |
| ATOM | 2913 | O    | MET | 193 | -10.298 | -6.875  | -18.906 | 1.00 | 0.00 | O |
| ATOM | 2914 | CB   | MET | 193 | -8.595  | -4.350  | -18.227 | 1.00 | 0.00 | C |
| ATOM | 2915 | CG   | MET | 193 | -9.225  | -3.912  | -16.900 | 1.00 | 0.00 | C |
| ATOM | 2916 | SD   | MET | 193 | -9.705  | -2.171  | -16.870 | 1.00 | 0.00 | S |
| ATOM | 2917 | CE   | MET | 193 | -10.758 | -2.196  | -15.408 | 1.00 | 0.00 | C |
| ATOM | 2918 | H    | MET | 193 | -7.613  | -5.500  | -20.250 | 1.00 | 0.00 | H |
| ATOM | 2919 | HA   | MET | 193 | -7.540  | -6.030  | -17.401 | 1.00 | 0.00 | H |
| ATOM | 2920 | HB2  | MET | 193 | -7.694  | -3.760  | -18.397 | 1.00 | 0.00 | H |
| ATOM | 2921 | HB3  | MET | 193 | -9.299  | -4.147  | -19.036 | 1.00 | 0.00 | H |
| ATOM | 2922 | HG2  | MET | 193 | -10.120 | -4.506  | -16.719 | 1.00 | 0.00 | H |
| ATOM | 2923 | HG3  | MET | 193 | -8.521  | -4.096  | -16.091 | 1.00 | 0.00 | H |
| ATOM | 2924 | HE1  | MET | 193 | -10.177 | -2.520  | -14.543 | 1.00 | 0.00 | H |
| ATOM | 2925 | HE2  | MET | 193 | -11.151 | -1.195  | -15.235 | 1.00 | 0.00 | H |
| ATOM | 2926 | HE3  | MET | 193 | -11.587 | -2.888  | -15.572 | 1.00 | 0.00 | H |
| ATOM | 2927 | N    | GLU | 194 | -9.605  | -7.243  | -16.781 | 1.00 | 0.00 | N |
| ATOM | 2928 | CA   | GLU | 194 | -10.760 | -7.976  | -16.265 | 1.00 | 0.00 | C |
| ATOM | 2929 | C    | GLU | 194 | -11.418 | -7.243  | -15.088 | 1.00 | 0.00 | C |
| ATOM | 2930 | O    | GLU | 194 | -10.840 | -6.343  | -14.475 | 1.00 | 0.00 | O |
| ATOM | 2931 | CB   | GLU | 194 | -10.311 | -9.379  | -15.815 | 1.00 | 0.00 | C |
| ATOM | 2932 | CG   | GLU | 194 | -10.339 | -10.392 | -16.967 | 1.00 | 0.00 | C |
| ATOM | 2933 | CD   | GLU | 194 | -11.755 | -10.608 | -17.517 | 1.00 | 0.00 | C |
| ATOM | 2934 | OE1  | GLU | 194 | -11.847 | -11.094 | -18.666 | 1.00 | 0.00 | O |
| ATOM | 2935 | OE2  | GLU | 194 | -12.721 | -10.274 | -16.788 | 1.00 | 0.00 | O |
| ATOM | 2936 | H    | GLU | 194 | -8.853  | -7.070  | -16.114 | 1.00 | 0.00 | H |
| ATOM | 2937 | HA   | GLU | 194 | -11.515 | -8.066  | -17.047 | 1.00 | 0.00 | H |
| ATOM | 2938 | HB2  | GLU | 194 | -9.307  | -9.321  | -15.401 | 1.00 | 0.00 | H |
| ATOM | 2939 | HB3  | GLU | 194 | -10.957 | -9.750  | -15.017 | 1.00 | 0.00 | H |
| ATOM | 2940 | HG2  | GLU | 194 | -9.681  | -10.044 | -17.765 | 1.00 | 0.00 | H |
| ATOM | 2941 | HG3  | GLU | 194 | -9.962  | -11.348 | -16.604 | 1.00 | 0.00 | H |
| ATOM | 2942 | N    | ALA | 195 | -12.639 | -7.648  | -14.724 | 1.00 | 0.00 | N |
| ATOM | 2943 | CA   | ALA | 195 | -13.429 | -6.960  | -13.693 | 1.00 | 0.00 | C |
| ATOM | 2944 | C    | ALA | 195 | -12.832 | -7.037  | -12.268 | 1.00 | 0.00 | C |
| ATOM | 2945 | O    | ALA | 195 | -13.208 | -6.251  | -11.394 | 1.00 | 0.00 | O |
| ATOM | 2946 | CB   | ALA | 195 | -14.869 | -7.483  | -13.751 | 1.00 | 0.00 | C |
| ATOM | 2947 | H    | ALA | 195 | -13.055 | -8.417  | -15.253 | 1.00 | 0.00 | H |
| ATOM | 2948 | HA   | ALA | 195 | -13.446 | -5.899  | -13.947 | 1.00 | 0.00 | H |
| ATOM | 2949 | HB1  | ALA | 195 | -14.892 | -8.550  | -13.523 | 1.00 | 0.00 | H |
| ATOM | 2950 | HB2  | ALA | 195 | -15.483 | -6.945  | -13.027 | 1.00 | 0.00 | H |
| ATOM | 2951 | HB3  | ALA | 195 | -15.277 | -7.320  | -14.748 | 1.00 | 0.00 | H |
| ATOM | 2952 | N    | GLU | 196 | -11.876 | -7.939  | -12.018 | 1.00 | 0.00 | N |
| ATOM | 2953 | CA   | GLU | 196 | -11.114 | -7.941  | -10.768 | 1.00 | 0.00 | C |
| ATOM | 2954 | C    | GLU | 196 | -10.023 | -6.847  | -10.709 | 1.00 | 0.00 | C |
| ATOM | 2955 | O    | GLU | 196 | -9.512  | -6.590  | -9.623  | 1.00 | 0.00 | O |
| ATOM | 2956 | CB   | GLU | 196 | -10.534 | -9.331  | -10.462 | 1.00 | 0.00 | C |
| ATOM | 2957 | CG   | GLU | 196 | -9.412  | -9.731  | -11.422 | 1.00 | 0.00 | C |
| ATOM | 2958 | CD   | GLU | 196 | -8.560  | -10.880 | -10.896 | 1.00 | 0.00 | C |
| ATOM | 2959 | OE1  | GLU | 196 | -8.085  | -10.794 | -9.737  | 1.00 | 0.00 | O |
| ATOM | 2960 | OE2  | GLU | 196 | -8.278  | -11.776 | -11.728 | 1.00 | 0.00 | O |

|      |      |      |     |     |         |         |         |      |      |   |
|------|------|------|-----|-----|---------|---------|---------|------|------|---|
| ATOM | 2961 | H    | GLU | 196 | -11.584 | -8.539  | -12.776 | 1.00 | 0.00 | H |
| ATOM | 2962 | HA   | GLU | 196 | -11.818 | -7.730  | -9.965  | 1.00 | 0.00 | H |
| ATOM | 2963 | HB2  | GLU | 196 | -10.152 | -9.310  | -9.440  | 1.00 | 0.00 | H |
| ATOM | 2964 | HB3  | GLU | 196 | -11.329 | -10.076 | -10.505 | 1.00 | 0.00 | H |
| ATOM | 2965 | HG2  | GLU | 196 | -9.854  | -10.000 | -12.383 | 1.00 | 0.00 | H |
| ATOM | 2966 | HG3  | GLU | 196 | -8.742  | -8.889  | -11.584 | 1.00 | 0.00 | H |
| ATOM | 2967 | N    | ASP | 197 | -9.681  | -6.183  | -11.821 | 1.00 | 0.00 | N |
| ATOM | 2968 | CA   | ASP | 197 | -8.526  | -5.275  | -11.910 | 1.00 | 0.00 | C |
| ATOM | 2969 | C    | ASP | 197 | -8.843  | -3.803  | -11.587 | 1.00 | 0.00 | C |
| ATOM | 2970 | O    | ASP | 197 | -7.939  | -3.062  | -11.209 | 1.00 | 0.00 | O |
| ATOM | 2971 | CB   | ASP | 197 | -7.912  | -5.343  | -13.318 | 1.00 | 0.00 | C |
| ATOM | 2972 | CG   | ASP | 197 | -7.415  | -6.728  | -13.733 | 1.00 | 0.00 | C |
| ATOM | 2973 | OD1  | ASP | 197 | -6.897  | -7.476  | -12.875 | 1.00 | 0.00 | O |
| ATOM | 2974 | OD2  | ASP | 197 | -7.492  | -7.041  | -14.942 | 1.00 | 0.00 | O |
| ATOM | 2975 | H    | ASP | 197 | -10.134 | -6.421  | -12.702 | 1.00 | 0.00 | H |
| ATOM | 2976 | HA   | ASP | 197 | -7.772  | -5.606  | -11.200 | 1.00 | 0.00 | H |
| ATOM | 2977 | HB2  | ASP | 197 | -8.652  | -4.989  | -14.036 | 1.00 | 0.00 | H |
| ATOM | 2978 | HB3  | ASP | 197 | -7.063  | -4.661  | -13.367 | 1.00 | 0.00 | H |
| ATOM | 2979 | N    | ALA | 198 | -10.098 | -3.361  | -11.728 | 1.00 | 0.00 | N |
| ATOM | 2980 | CA   | ALA | 198 | -10.496 | -1.974  | -11.457 | 1.00 | 0.00 | C |
| ATOM | 2981 | C    | ALA | 198 | -10.248 | -1.581  | -9.984  | 1.00 | 0.00 | C |
| ATOM | 2982 | O    | ALA | 198 | -10.906 | -2.099  | -9.081  | 1.00 | 0.00 | O |
| ATOM | 2983 | CB   | ALA | 198 | -11.964 | -1.792  | -11.865 | 1.00 | 0.00 | C |
| ATOM | 2984 | H    | ALA | 198 | -10.782 | -4.013  | -12.089 | 1.00 | 0.00 | H |
| ATOM | 2985 | HA   | ALA | 198 | -9.888  | -1.318  | -12.083 | 1.00 | 0.00 | H |
| ATOM | 2986 | HB1  | ALA | 198 | -12.602 | -2.456  | -11.277 | 1.00 | 0.00 | H |
| ATOM | 2987 | HB2  | ALA | 198 | -12.257 | -0.757  | -11.689 | 1.00 | 0.00 | H |
| ATOM | 2988 | HB3  | ALA | 198 | -12.089 | -2.017  | -12.924 | 1.00 | 0.00 | H |
| ATOM | 2989 | N    | ALA | 199 | -9.278  | -0.694  | -9.732  | 1.00 | 0.00 | N |
| ATOM | 2990 | CA   | ALA | 199 | -8.616  | -0.497  | -8.439  | 1.00 | 0.00 | C |
| ATOM | 2991 | C    | ALA | 199 | -7.622  | 0.679   | -8.489  | 1.00 | 0.00 | C |
| ATOM | 2992 | O    | ALA | 199 | -7.310  | 1.183   | -9.571  | 1.00 | 0.00 | O |
| ATOM | 2993 | CB   | ALA | 199 | -7.881  | -1.793  | -8.065  | 1.00 | 0.00 | C |
| ATOM | 2994 | H    | ALA | 199 | -8.855  | -0.225  | -10.521 | 1.00 | 0.00 | H |
| ATOM | 2995 | HA   | ALA | 199 | -9.366  | -0.273  | -7.683  | 1.00 | 0.00 | H |
| ATOM | 2996 | HB1  | ALA | 199 | -7.126  | -1.991  | -8.828  | 1.00 | 0.00 | H |
| ATOM | 2997 | HB2  | ALA | 199 | -7.397  | -1.689  | -7.095  | 1.00 | 0.00 | H |
| ATOM | 2998 | HB3  | ALA | 199 | -8.568  | -2.636  | -8.036  | 1.00 | 0.00 | H |
| ATOM | 2999 | N    | THR | 200 | -7.090  | 1.096   | -7.334  | 1.00 | 0.00 | N |
| ATOM | 3000 | CA   | THR | 200 | -6.020  | 2.094   | -7.244  | 1.00 | 0.00 | C |
| ATOM | 3001 | C    | THR | 200 | -4.679  | 1.383   | -7.185  | 1.00 | 0.00 | C |
| ATOM | 3002 | O    | THR | 200 | -4.430  | 0.559   | -6.307  | 1.00 | 0.00 | O |
| ATOM | 3003 | CB   | THR | 200 | -6.222  | 3.016   | -6.043  | 1.00 | 0.00 | C |
| ATOM | 3004 | CG2  | THR | 200 | -5.227  | 4.174   | -6.052  | 1.00 | 0.00 | C |
| ATOM | 3005 | OG1  | THR | 200 | -7.496  | 3.610   | -6.135  | 1.00 | 0.00 | O |
| ATOM | 3006 | H    | THR | 200 | -7.350  | 0.631   | -6.471  | 1.00 | 0.00 | H |
| ATOM | 3007 | HA   | THR | 200 | -6.040  | 2.719   | -8.129  | 1.00 | 0.00 | H |
| ATOM | 3008 | HB   | THR | 200 | -6.136  | 2.446   | -5.115  | 1.00 | 0.00 | H |
| ATOM | 3009 | HG1  | THR | 200 | -7.590  | 4.171   | -5.362  | 1.00 | 0.00 | H |
| ATOM | 3010 | HG21 | THR | 200 | -5.332  | 4.743   | -6.975  | 1.00 | 0.00 | H |
| ATOM | 3011 | HG22 | THR | 200 | -5.417  | 4.834   | -5.206  | 1.00 | 0.00 | H |
| ATOM | 3012 | HG23 | THR | 200 | -4.209  | 3.795   | -5.972  | 1.00 | 0.00 | H |
| ATOM | 3013 | N    | TYR | 201 | -3.808  | 1.690   | -8.139  | 1.00 | 0.00 | N |
| ATOM | 3014 | CA   | TYR | 201 | -2.492  | 1.069   | -8.290  | 1.00 | 0.00 | C |
| ATOM | 3015 | C    | TYR | 201 | -1.393  | 1.930   | -7.665  | 1.00 | 0.00 | C |
| ATOM | 3016 | O    | TYR | 201 | -0.987  | 2.958   | -8.217  | 1.00 | 0.00 | O |
| ATOM | 3017 | CB   | TYR | 201 | -2.219  | 0.766   | -9.768  | 1.00 | 0.00 | C |

|      |      |     |     |     |        |        |         |      |      |   |
|------|------|-----|-----|-----|--------|--------|---------|------|------|---|
| ATOM | 3018 | CG  | TYR | 201 | -3.022 | -0.415 | -10.271 | 1.00 | 0.00 | C |
| ATOM | 3019 | CD1 | TYR | 201 | -4.328 | -0.227 | -10.765 | 1.00 | 0.00 | C |
| ATOM | 3020 | CD2 | TYR | 201 | -2.482 | -1.715 | -10.184 | 1.00 | 0.00 | C |
| ATOM | 3021 | CE1 | TYR | 201 | -5.092 | -1.334 | -11.173 | 1.00 | 0.00 | C |
| ATOM | 3022 | CE2 | TYR | 201 | -3.240 | -2.824 | -10.604 | 1.00 | 0.00 | C |
| ATOM | 3023 | CZ  | TYR | 201 | -4.549 | -2.635 | -11.097 | 1.00 | 0.00 | C |
| ATOM | 3024 | OH  | TYR | 201 | -5.295 | -3.712 | -11.451 | 1.00 | 0.00 | O |
| ATOM | 3025 | H   | TYR | 201 | -4.105 | 2.348  | -8.851  | 1.00 | 0.00 | H |
| ATOM | 3026 | HA  | TYR | 201 | -2.488 | 0.115  | -7.765  | 1.00 | 0.00 | H |
| ATOM | 3027 | HB2 | TYR | 201 | -2.440 | 1.647  | -10.373 | 1.00 | 0.00 | H |
| ATOM | 3028 | HB3 | TYR | 201 | -1.159 | 0.536  | -9.889  | 1.00 | 0.00 | H |
| ATOM | 3029 | HD1 | TYR | 201 | -4.751 | 0.768  | -10.807 | 1.00 | 0.00 | H |
| ATOM | 3030 | HD2 | TYR | 201 | -1.490 | -1.858 | -9.780  | 1.00 | 0.00 | H |
| ATOM | 3031 | HE1 | TYR | 201 | -6.097 | -1.191 | -11.536 | 1.00 | 0.00 | H |
| ATOM | 3032 | HE2 | TYR | 201 | -2.837 | -3.822 | -10.544 | 1.00 | 0.00 | H |
| ATOM | 3033 | HH  | TYR | 201 | -6.199 | -3.445 | -11.674 | 1.00 | 0.00 | H |
| ATOM | 3034 | N   | TYR | 202 | -0.904 | 1.490  | -6.501  | 1.00 | 0.00 | N |
| ATOM | 3035 | CA  | TYR | 202 | 0.202  | 2.105  | -5.764  | 1.00 | 0.00 | C |
| ATOM | 3036 | C   | TYR | 202 | 1.540  | 1.412  | -6.029  | 1.00 | 0.00 | C |
| ATOM | 3037 | O   | TYR | 202 | 1.611  | 0.199  | -6.246  | 1.00 | 0.00 | O |
| ATOM | 3038 | CB  | TYR | 202 | -0.083 | 2.073  | -4.259  | 1.00 | 0.00 | C |
| ATOM | 3039 | CG  | TYR | 202 | -1.122 | 3.079  | -3.818  | 1.00 | 0.00 | C |
| ATOM | 3040 | CD1 | TYR | 202 | -0.751 | 4.425  | -3.645  | 1.00 | 0.00 | C |
| ATOM | 3041 | CD2 | TYR | 202 | -2.449 | 2.678  | -3.585  | 1.00 | 0.00 | C |
| ATOM | 3042 | CE1 | TYR | 202 | -1.712 | 5.380  | -3.272  | 1.00 | 0.00 | C |
| ATOM | 3043 | CE2 | TYR | 202 | -3.412 | 3.625  | -3.189  | 1.00 | 0.00 | C |
| ATOM | 3044 | CZ  | TYR | 202 | -3.051 | 4.983  | -3.052  | 1.00 | 0.00 | C |
| ATOM | 3045 | OH  | TYR | 202 | -4.000 | 5.910  | -2.757  | 1.00 | 0.00 | O |
| ATOM | 3046 | H   | TYR | 202 | -1.262 | 0.609  | -6.155  | 1.00 | 0.00 | H |
| ATOM | 3047 | HA  | TYR | 202 | 0.305  | 3.150  | -6.071  | 1.00 | 0.00 | H |
| ATOM | 3048 | HB2 | TYR | 202 | -0.389 | 1.071  | -3.962  | 1.00 | 0.00 | H |
| ATOM | 3049 | HB3 | TYR | 202 | 0.840  | 2.301  | -3.723  | 1.00 | 0.00 | H |
| ATOM | 3050 | HD1 | TYR | 202 | 0.270  | 4.731  | -3.826  | 1.00 | 0.00 | H |
| ATOM | 3051 | HD2 | TYR | 202 | -2.733 | 1.642  | -3.708  | 1.00 | 0.00 | H |
| ATOM | 3052 | HE1 | TYR | 202 | -1.427 | 6.420  | -3.193  | 1.00 | 0.00 | H |
| ATOM | 3053 | HE2 | TYR | 202 | -4.429 | 3.312  | -3.010  | 1.00 | 0.00 | H |
| ATOM | 3054 | HH  | TYR | 202 | -3.667 | 6.802  | -2.900  | 1.00 | 0.00 | H |
| ATOM | 3055 | N   | CYS | 203 | 2.606  | 2.206  | -5.969  | 1.00 | 0.00 | N |
| ATOM | 3056 | CA  | CYS | 203 | 4.000  | 1.796  | -6.123  | 1.00 | 0.00 | C |
| ATOM | 3057 | C   | CYS | 203 | 4.835  | 2.142  | -4.868  | 1.00 | 0.00 | C |
| ATOM | 3058 | O   | CYS | 203 | 4.451  | 3.006  | -4.079  | 1.00 | 0.00 | O |
| ATOM | 3059 | CB  | CYS | 203 | 4.546  | 2.469  | -7.393  | 1.00 | 0.00 | C |
| ATOM | 3060 | SG  | CYS | 203 | 4.323  | 4.268  | -7.264  | 1.00 | 0.00 | S |
| ATOM | 3061 | H   | CYS | 203 | 2.457  | 3.195  | -5.818  | 1.00 | 0.00 | H |
| ATOM | 3062 | HA  | CYS | 203 | 4.046  | 0.715  | -6.258  | 1.00 | 0.00 | H |
| ATOM | 3063 | HB2 | CYS | 203 | 5.601  | 2.230  | -7.503  | 1.00 | 0.00 | H |
| ATOM | 3064 | HB3 | CYS | 203 | 4.014  | 2.099  | -8.274  | 1.00 | 0.00 | H |
| ATOM | 3065 | HG  | CYS | 203 | 5.034  | 4.638  | -8.338  | 1.00 | 0.00 | H |
| ATOM | 3066 | N   | GLN | 204 | 5.979  | 1.475  | -4.695  | 1.00 | 0.00 | N |
| ATOM | 3067 | CA  | GLN | 204 | 6.905  | 1.632  | -3.562  | 1.00 | 0.00 | C |
| ATOM | 3068 | C   | GLN | 204 | 8.351  | 1.466  | -4.034  | 1.00 | 0.00 | C |
| ATOM | 3069 | O   | GLN | 204 | 8.609  | 0.652  | -4.922  | 1.00 | 0.00 | O |
| ATOM | 3070 | CB  | GLN | 204 | 6.548  | 0.589  | -2.475  | 1.00 | 0.00 | C |
| ATOM | 3071 | CG  | GLN | 204 | 7.565  | 0.390  | -1.325  | 1.00 | 0.00 | C |
| ATOM | 3072 | CD  | GLN | 204 | 8.577  | -0.751 | -1.547  | 1.00 | 0.00 | C |
| ATOM | 3073 | NE2 | GLN | 204 | 8.303  | -1.955 | -1.080  | 1.00 | 0.00 | N |
| ATOM | 3074 | OE1 | GLN | 204 | 9.635  | -0.595 | -2.136  | 1.00 | 0.00 | O |

|      |      |      |     |     |        |        |        |      |      |   |
|------|------|------|-----|-----|--------|--------|--------|------|------|---|
| ATOM | 3075 | H    | GLN | 204 | 6.234  | 0.782  | -5.389 | 1.00 | 0.00 | H |
| ATOM | 3076 | HA   | GLN | 204 | 6.799  | 2.631  | -3.142 | 1.00 | 0.00 | H |
| ATOM | 3077 | HB2  | GLN | 204 | 5.613  | 0.925  | -2.028 | 1.00 | 0.00 | H |
| ATOM | 3078 | HB3  | GLN | 204 | 6.365  | -0.378 | -2.949 | 1.00 | 0.00 | H |
| ATOM | 3079 | HG2  | GLN | 204 | 8.091  | 1.321  | -1.115 | 1.00 | 0.00 | H |
| ATOM | 3080 | HG3  | GLN | 204 | 7.002  | 0.145  | -0.428 | 1.00 | 0.00 | H |
| ATOM | 3081 | HE21 | GLN | 204 | 8.996  | -2.666 | -1.247 | 1.00 | 0.00 | H |
| ATOM | 3082 | HE22 | GLN | 204 | 7.450  | -2.157 | -0.582 | 1.00 | 0.00 | H |
| ATOM | 3083 | N    | GLN | 205 | 9.290  | 2.176  | -3.399 | 1.00 | 0.00 | N |
| ATOM | 3084 | CA   | GLN | 205 | 10.729 | 1.957  | -3.532 | 1.00 | 0.00 | C |
| ATOM | 3085 | C    | GLN | 205 | 11.445 | 1.978  | -2.166 | 1.00 | 0.00 | C |
| ATOM | 3086 | O    | GLN | 205 | 11.374 | 2.958  | -1.418 | 1.00 | 0.00 | O |
| ATOM | 3087 | CB   | GLN | 205 | 11.343 | 2.996  | -4.488 | 1.00 | 0.00 | C |
| ATOM | 3088 | CG   | GLN | 205 | 10.970 | 4.454  | -4.147 | 1.00 | 0.00 | C |
| ATOM | 3089 | CD   | GLN | 205 | 11.777 | 5.480  | -4.921 | 1.00 | 0.00 | C |
| ATOM | 3090 | NE2  | GLN | 205 | 11.209 | 6.614  | -5.260 | 1.00 | 0.00 | N |
| ATOM | 3091 | OE1  | GLN | 205 | 12.949 | 5.295  | -5.192 | 1.00 | 0.00 | O |
| ATOM | 3092 | H    | GLN | 205 | 8.996  | 2.844  | -2.690 | 1.00 | 0.00 | H |
| ATOM | 3093 | HA   | GLN | 205 | 10.883 | 0.967  | -3.971 | 1.00 | 0.00 | H |
| ATOM | 3094 | HB2  | GLN | 205 | 12.426 | 2.878  | -4.461 | 1.00 | 0.00 | H |
| ATOM | 3095 | HB3  | GLN | 205 | 11.006 | 2.786  | -5.503 | 1.00 | 0.00 | H |
| ATOM | 3096 | HG2  | GLN | 205 | 9.913  | 4.603  | -4.348 | 1.00 | 0.00 | H |
| ATOM | 3097 | HG3  | GLN | 205 | 11.137 | 4.660  | -3.094 | 1.00 | 0.00 | H |
| ATOM | 3098 | HE21 | GLN | 205 | 11.733 | 7.254  | -5.835 | 1.00 | 0.00 | H |
| ATOM | 3099 | HE22 | GLN | 205 | 10.236 | 6.799  | -5.077 | 1.00 | 0.00 | H |
| ATOM | 3100 | N    | TRP | 206 | 12.188 | 0.903  | -1.868 | 1.00 | 0.00 | N |
| ATOM | 3101 | CA   | TRP | 206 | 12.928 | 0.711  | -0.612 | 1.00 | 0.00 | C |
| ATOM | 3102 | C    | TRP | 206 | 14.467 | 0.681  | -0.772 | 1.00 | 0.00 | C |
| ATOM | 3103 | O    | TRP | 206 | 15.170 | 0.695  | 0.233  | 1.00 | 0.00 | O |
| ATOM | 3104 | CB   | TRP | 206 | 12.434 | -0.593 | 0.048  | 1.00 | 0.00 | C |
| ATOM | 3105 | CG   | TRP | 206 | 13.171 | -1.841 | -0.343 | 1.00 | 0.00 | C |
| ATOM | 3106 | CD1  | TRP | 206 | 14.009 | -2.523 | 0.470  | 1.00 | 0.00 | C |
| ATOM | 3107 | CD2  | TRP | 206 | 13.212 | -2.540 | -1.628 | 1.00 | 0.00 | C |
| ATOM | 3108 | CE2  | TRP | 206 | 14.128 | -3.630 | -1.519 | 1.00 | 0.00 | C |
| ATOM | 3109 | CE3  | TRP | 206 | 12.578 | -2.362 | -2.878 | 1.00 | 0.00 | C |
| ATOM | 3110 | NE1  | TRP | 206 | 14.572 | -3.579 | -0.215 | 1.00 | 0.00 | N |
| ATOM | 3111 | CZ2  | TRP | 206 | 14.410 | -4.490 | -2.590 | 1.00 | 0.00 | C |
| ATOM | 3112 | CZ3  | TRP | 206 | 12.861 | -3.213 | -3.960 | 1.00 | 0.00 | C |
| ATOM | 3113 | CH2  | TRP | 206 | 13.763 | -4.282 | -3.818 | 1.00 | 0.00 | C |
| ATOM | 3114 | H    | TRP | 206 | 12.061 | 0.085  | -2.448 | 1.00 | 0.00 | H |
| ATOM | 3115 | HA   | TRP | 206 | 12.694 | 1.537  | 0.059  | 1.00 | 0.00 | H |
| ATOM | 3116 | HB2  | TRP | 206 | 12.544 | -0.482 | 1.124  | 1.00 | 0.00 | H |
| ATOM | 3117 | HB3  | TRP | 206 | 11.370 | -0.732 | -0.140 | 1.00 | 0.00 | H |
| ATOM | 3118 | HD1  | TRP | 206 | 14.225 | -2.254 | 1.497  | 1.00 | 0.00 | H |
| ATOM | 3119 | HE1  | TRP | 206 | 15.224 | -4.230 | 0.198  | 1.00 | 0.00 | H |
| ATOM | 3120 | HE3  | TRP | 206 | 11.842 | -1.584 | -2.998 | 1.00 | 0.00 | H |
| ATOM | 3121 | HZ2  | TRP | 206 | 15.092 | -5.320 | -2.470 | 1.00 | 0.00 | H |
| ATOM | 3122 | HZ3  | TRP | 206 | 12.354 | -3.066 | -4.900 | 1.00 | 0.00 | H |
| ATOM | 3123 | HH2  | TRP | 206 | 13.942 | -4.961 | -4.644 | 1.00 | 0.00 | H |
| ATOM | 3124 | N    | SER | 207 | 14.978 | 0.623  | -2.011 | 1.00 | 0.00 | N |
| ATOM | 3125 | CA   | SER | 207 | 16.407 | 0.460  | -2.336 | 1.00 | 0.00 | C |
| ATOM | 3126 | C    | SER | 207 | 17.236 | 1.734  | -2.065 | 1.00 | 0.00 | C |
| ATOM | 3127 | O    | SER | 207 | 17.642 | 1.978  | -0.930 | 1.00 | 0.00 | O |
| ATOM | 3128 | CB   | SER | 207 | 16.542 | -0.047 | -3.783 | 1.00 | 0.00 | C |
| ATOM | 3129 | OG   | SER | 207 | 17.903 | -0.268 | -4.099 | 1.00 | 0.00 | O |
| ATOM | 3130 | H    | SER | 207 | 14.317 | 0.600  | -2.768 | 1.00 | 0.00 | H |
| ATOM | 3131 | HA   | SER | 207 | 16.826 | -0.310 | -1.685 | 1.00 | 0.00 | H |



|      |      |      |     |     |        |        |        |      |      |   |
|------|------|------|-----|-----|--------|--------|--------|------|------|---|
| ATOM | 3132 | HB2  | SER | 207 | 15.994 | -0.986 | -3.891 | 1.00 | 0.00 | H |
| ATOM | 3133 | HB3  | SER | 207 | 16.119 | 0.688  | -4.468 | 1.00 | 0.00 | H |
| ATOM | 3134 | HG   | SER | 207 | 18.057 | -0.191 | -5.056 | 1.00 | 0.00 | H |
| ATOM | 3135 | N    | ASN | 208 | 17.479 | 2.584  | -3.071 | 1.00 | 0.00 | N |
| ATOM | 3136 | CA   | ASN | 208 | 18.211 | 3.858  | -2.967 | 1.00 | 0.00 | C |
| ATOM | 3137 | C    | ASN | 208 | 17.341 | 4.957  | -2.298 | 1.00 | 0.00 | C |
| ATOM | 3138 | O    | ASN | 208 | 17.298 | 6.111  | -2.735 | 1.00 | 0.00 | O |
| ATOM | 3139 | CB   | ASN | 208 | 18.690 | 4.221  | -4.389 | 1.00 | 0.00 | C |
| ATOM | 3140 | CG   | ASN | 208 | 19.868 | 5.192  | -4.426 | 1.00 | 0.00 | C |
| ATOM | 3141 | ND2  | ASN | 208 | 19.654 | 6.470  | -4.187 | 1.00 | 0.00 | N |
| ATOM | 3142 | OD1  | ASN | 208 | 20.995 | 4.810  | -4.687 | 1.00 | 0.00 | O |
| ATOM | 3143 | H    | ASN | 208 | 17.137 | 2.339  | -3.985 | 1.00 | 0.00 | H |
| ATOM | 3144 | HA   | ASN | 208 | 19.084 | 3.691  | -2.338 | 1.00 | 0.00 | H |
| ATOM | 3145 | HB2  | ASN | 208 | 19.015 | 3.309  | -4.896 | 1.00 | 0.00 | H |
| ATOM | 3146 | HB3  | ASN | 208 | 17.858 | 4.637  | -4.957 | 1.00 | 0.00 | H |
| ATOM | 3147 | HD21 | ASN | 208 | 20.449 | 7.086  | -4.208 | 1.00 | 0.00 | H |
| ATOM | 3148 | HD22 | ASN | 208 | 18.739 | 6.756  | -3.863 | 1.00 | 0.00 | H |
| ATOM | 3149 | N    | SER | 209 | 16.540 | 4.577  | -1.296 | 1.00 | 0.00 | N |
| ATOM | 3150 | CA   | SER | 209 | 15.230 | 5.200  | -1.077 | 1.00 | 0.00 | C |
| ATOM | 3151 | C    | SER | 209 | 14.760 | 5.084  | 0.390  | 1.00 | 0.00 | C |
| ATOM | 3152 | O    | SER | 209 | 14.803 | 3.990  | 0.960  | 1.00 | 0.00 | O |
| ATOM | 3153 | CB   | SER | 209 | 14.176 | 4.561  | -2.009 | 1.00 | 0.00 | C |
| ATOM | 3154 | OG   | SER | 209 | 14.651 | 4.428  | -3.345 | 1.00 | 0.00 | O |
| ATOM | 3155 | H    | SER | 209 | 16.680 | 3.634  | -0.940 | 1.00 | 0.00 | H |
| ATOM | 3156 | HA   | SER | 209 | 15.311 | 6.251  | -1.348 | 1.00 | 0.00 | H |
| ATOM | 3157 | HB2  | SER | 209 | 13.935 | 3.566  | -1.634 | 1.00 | 0.00 | H |
| ATOM | 3158 | HB3  | SER | 209 | 13.268 | 5.168  | -1.996 | 1.00 | 0.00 | H |
| ATOM | 3159 | HG   | SER | 209 | 14.006 | 4.775  | -3.994 | 1.00 | 0.00 | H |
| ATOM | 3160 | N    | PRO | 210 | 14.263 | 6.176  | 1.017  | 1.00 | 0.00 | N |
| ATOM | 3161 | CA   | PRO | 210 | 13.735 | 6.198  | 2.381  | 1.00 | 0.00 | C |
| ATOM | 3162 | C    | PRO | 210 | 12.314 | 5.603  | 2.437  | 1.00 | 0.00 | C |
| ATOM | 3163 | O    | PRO | 210 | 11.404 | 6.236  | 2.956  | 1.00 | 0.00 | O |
| ATOM | 3164 | CB   | PRO | 210 | 13.800 | 7.677  | 2.794  | 1.00 | 0.00 | C |
| ATOM | 3165 | CG   | PRO | 210 | 13.444 | 8.380  | 1.490  | 1.00 | 0.00 | C |
| ATOM | 3166 | CD   | PRO | 210 | 14.163 | 7.515  | 0.457  | 1.00 | 0.00 | C |
| ATOM | 3167 | HA   | PRO | 210 | 14.382 | 5.631  | 3.044  | 1.00 | 0.00 | H |
| ATOM | 3168 | HB2  | PRO | 210 | 13.116 | 7.934  | 3.604  | 1.00 | 0.00 | H |
| ATOM | 3169 | HB3  | PRO | 210 | 14.821 | 7.937  | 3.079  | 1.00 | 0.00 | H |
| ATOM | 3170 | HG2  | PRO | 210 | 12.365 | 8.340  | 1.326  | 1.00 | 0.00 | H |
| ATOM | 3171 | HG3  | PRO | 210 | 13.792 | 9.408  | 1.475  | 1.00 | 0.00 | H |
| ATOM | 3172 | HD2  | PRO | 210 | 13.582 | 7.479  | -0.455 | 1.00 | 0.00 | H |
| ATOM | 3173 | HD3  | PRO | 210 | 15.163 | 7.915  | 0.276  | 1.00 | 0.00 | H |
| ATOM | 3174 | N    | ARG | 211 | 12.107 | 4.407  | 1.858  | 1.00 | 0.00 | N |
| ATOM | 3175 | CA   | ARG | 211 | 10.827 | 3.681  | 1.786  | 1.00 | 0.00 | C |
| ATOM | 3176 | C    | ARG | 211 | 9.669  | 4.561  | 1.269  | 1.00 | 0.00 | C |
| ATOM | 3177 | O    | ARG | 211 | 8.583  | 4.618  | 1.846  | 1.00 | 0.00 | O |
| ATOM | 3178 | CB   | ARG | 211 | 10.535 | 2.935  | 3.111  | 1.00 | 0.00 | C |
| ATOM | 3179 | CG   | ARG | 211 | 11.218 | 1.553  | 3.177  | 1.00 | 0.00 | C |
| ATOM | 3180 | CD   | ARG | 211 | 12.755 | 1.569  | 3.212  | 1.00 | 0.00 | C |
| ATOM | 3181 | NE   | ARG | 211 | 13.245 | 2.174  | 4.455  | 1.00 | 0.00 | N |
| ATOM | 3182 | CZ   | ARG | 211 | 14.273 | 2.989  | 4.632  | 1.00 | 0.00 | C |
| ATOM | 3183 | NH1  | ARG | 211 | 15.117 | 3.308  | 3.670  | 1.00 | 0.00 | N |
| ATOM | 3184 | NH2  | ARG | 211 | 14.446 | 3.491  | 5.831  | 1.00 | 0.00 | N |
| ATOM | 3185 | H    | ARG | 211 | 12.909 | 3.945  | 1.446  | 1.00 | 0.00 | H |
| ATOM | 3186 | HA   | ARG | 211 | 10.945 | 2.918  | 1.021  | 1.00 | 0.00 | H |
| ATOM | 3187 | HB2  | ARG | 211 | 10.830 | 3.547  | 3.964  | 1.00 | 0.00 | H |
| ATOM | 3188 | HB3  | ARG | 211 | 9.464  | 2.749  | 3.195  | 1.00 | 0.00 | H |

|      |      |      |     |     |        |        |        |      |      |   |
|------|------|------|-----|-----|--------|--------|--------|------|------|---|
| ATOM | 3189 | HG2  | ARG | 211 | 10.857 | 1.034  | 4.067  | 1.00 | 0.00 | H |
| ATOM | 3190 | HG3  | ARG | 211 | 10.901 | 0.970  | 2.311  | 1.00 | 0.00 | H |
| ATOM | 3191 | HD2  | ARG | 211 | 13.115 | 0.542  | 3.167  | 1.00 | 0.00 | H |
| ATOM | 3192 | HD3  | ARG | 211 | 13.141 | 2.093  | 2.342  | 1.00 | 0.00 | H |
| ATOM | 3193 | HE   | ARG | 211 | 12.719 | 1.956  | 5.309  | 1.00 | 0.00 | H |
| ATOM | 3194 | HH11 | ARG | 211 | 14.939 | 3.007  | 2.713  | 1.00 | 0.00 | H |
| ATOM | 3195 | HH12 | ARG | 211 | 15.900 | 3.910  | 3.836  | 1.00 | 0.00 | H |
| ATOM | 3196 | HH21 | ARG | 211 | 13.790 | 3.163  | 6.555  | 1.00 | 0.00 | H |
| ATOM | 3197 | HH22 | ARG | 211 | 15.169 | 4.146  | 6.041  | 1.00 | 0.00 | H |
| ATOM | 3198 | N    | THR | 212 | 9.904  | 5.252  | 0.144  | 1.00 | 0.00 | N |
| ATOM | 3199 | CA   | THR | 212 | 8.910  | 6.120  | -0.517 | 1.00 | 0.00 | C |
| ATOM | 3200 | C    | THR | 212 | 7.822  | 5.253  | -1.146 | 1.00 | 0.00 | C |
| ATOM | 3201 | O    | THR | 212 | 8.123  | 4.346  | -1.922 | 1.00 | 0.00 | O |
| ATOM | 3202 | CB   | THR | 212 | 9.556  | 7.048  | -1.568 | 1.00 | 0.00 | C |
| ATOM | 3203 | CG2  | THR | 212 | 8.534  | 7.903  | -2.319 | 1.00 | 0.00 | C |
| ATOM | 3204 | OG1  | THR | 212 | 10.448 | 7.951  | -0.954 | 1.00 | 0.00 | O |
| ATOM | 3205 | H    | THR | 212 | 10.760 | 5.037  | -0.343 | 1.00 | 0.00 | H |
| ATOM | 3206 | HA   | THR | 212 | 8.447  | 6.746  | 0.247  | 1.00 | 0.00 | H |
| ATOM | 3207 | HB   | THR | 212 | 10.102 | 6.447  | -2.293 | 1.00 | 0.00 | H |
| ATOM | 3208 | HG1  | THR | 212 | 10.616 | 8.658  | -1.598 | 1.00 | 0.00 | H |
| ATOM | 3209 | HG21 | THR | 212 | 7.922  | 8.463  | -1.612 | 1.00 | 0.00 | H |
| ATOM | 3210 | HG22 | THR | 212 | 9.041  | 8.602  | -2.984 | 1.00 | 0.00 | H |
| ATOM | 3211 | HG23 | THR | 212 | 7.888  | 7.272  | -2.926 | 1.00 | 0.00 | H |
| ATOM | 3212 | N    | PHE | 213 | 6.563  | 5.587  | -0.844 | 1.00 | 0.00 | N |
| ATOM | 3213 | CA   | PHE | 213 | 5.347  | 5.141  | -1.528 | 1.00 | 0.00 | C |
| ATOM | 3214 | C    | PHE | 213 | 4.793  | 6.281  | -2.408 | 1.00 | 0.00 | C |
| ATOM | 3215 | O    | PHE | 213 | 5.148  | 7.448  | -2.229 | 1.00 | 0.00 | O |
| ATOM | 3216 | CB   | PHE | 213 | 4.307  | 4.679  | -0.491 | 1.00 | 0.00 | C |
| ATOM | 3217 | CG   | PHE | 213 | 4.496  | 3.271  | 0.052  | 1.00 | 0.00 | C |
| ATOM | 3218 | CD1  | PHE | 213 | 5.548  | 2.981  | 0.942  | 1.00 | 0.00 | C |
| ATOM | 3219 | CD2  | PHE | 213 | 3.575  | 2.259  | -0.282 | 1.00 | 0.00 | C |
| ATOM | 3220 | CE1  | PHE | 213 | 5.670  | 1.696  | 1.502  | 1.00 | 0.00 | C |
| ATOM | 3221 | CE2  | PHE | 213 | 3.686  | 0.977  | 0.287  | 1.00 | 0.00 | C |
| ATOM | 3222 | CZ   | PHE | 213 | 4.735  | 0.694  | 1.179  | 1.00 | 0.00 | C |
| ATOM | 3223 | H    | PHE | 213 | 6.423  | 6.337  | -0.186 | 1.00 | 0.00 | H |
| ATOM | 3224 | HA   | PHE | 213 | 5.574  | 4.304  | -2.186 | 1.00 | 0.00 | H |
| ATOM | 3225 | HB2  | PHE | 213 | 4.298  | 5.378  | 0.346  | 1.00 | 0.00 | H |
| ATOM | 3226 | HB3  | PHE | 213 | 3.320  | 4.731  | -0.949 | 1.00 | 0.00 | H |
| ATOM | 3227 | HD1  | PHE | 213 | 6.251  | 3.753  | 1.215  | 1.00 | 0.00 | H |
| ATOM | 3228 | HD2  | PHE | 213 | 2.760  | 2.471  | -0.957 | 1.00 | 0.00 | H |
| ATOM | 3229 | HE1  | PHE | 213 | 6.466  | 1.484  | 2.203  | 1.00 | 0.00 | H |
| ATOM | 3230 | HE2  | PHE | 213 | 2.948  | 0.222  | 0.059  | 1.00 | 0.00 | H |
| ATOM | 3231 | HZ   | PHE | 213 | 4.810  | -0.283 | 1.640  | 1.00 | 0.00 | H |
| ATOM | 3232 | N    | GLY | 214 | 3.971  | 5.919  | -3.401 | 1.00 | 0.00 | N |
| ATOM | 3233 | CA   | GLY | 214 | 3.572  | 6.801  | -4.509 | 1.00 | 0.00 | C |
| ATOM | 3234 | C    | GLY | 214 | 2.117  | 7.272  | -4.487 | 1.00 | 0.00 | C |
| ATOM | 3235 | O    | GLY | 214 | 1.351  | 7.002  | -3.563 | 1.00 | 0.00 | O |
| ATOM | 3236 | H    | GLY | 214 | 3.758  | 4.932  | -3.492 | 1.00 | 0.00 | H |
| ATOM | 3237 | HA2  | GLY | 214 | 4.206  | 7.689  | -4.528 | 1.00 | 0.00 | H |
| ATOM | 3238 | HA3  | GLY | 214 | 3.718  | 6.267  | -5.447 | 1.00 | 0.00 | H |
| ATOM | 3239 | N    | GLY | 215 | 1.750  | 7.993  | -5.551 | 1.00 | 0.00 | N |
| ATOM | 3240 | CA   | GLY | 215 | 0.492  | 8.752  | -5.647 | 1.00 | 0.00 | C |
| ATOM | 3241 | C    | GLY | 215 | -0.793 | 7.920  | -5.709 | 1.00 | 0.00 | C |
| ATOM | 3242 | O    | GLY | 215 | -1.796 | 8.318  | -5.126 | 1.00 | 0.00 | O |
| ATOM | 3243 | H    | GLY | 215 | 2.449  | 8.151  | -6.264 | 1.00 | 0.00 | H |
| ATOM | 3244 | HA2  | GLY | 215 | 0.408  | 9.409  | -4.781 | 1.00 | 0.00 | H |
| ATOM | 3245 | HA3  | GLY | 215 | 0.520  | 9.359  | -6.552 | 1.00 | 0.00 | H |

|      |      |      |     |     |         |        |         |      |      |   |
|------|------|------|-----|-----|---------|--------|---------|------|------|---|
| ATOM | 3246 | N    | GLY | 216 | -0.781  | 6.766  | -6.384  | 1.00 | 0.00 | N |
| ATOM | 3247 | CA   | GLY | 216 | -1.950  | 5.882  | -6.542  | 1.00 | 0.00 | C |
| ATOM | 3248 | C    | GLY | 216 | -2.907  | 6.321  | -7.654  | 1.00 | 0.00 | C |
| ATOM | 3249 | O    | GLY | 216 | -3.665  | 7.275  | -7.492  | 1.00 | 0.00 | O |
| ATOM | 3250 | H    | GLY | 216 | 0.096   | 6.479  | -6.813  | 1.00 | 0.00 | H |
| ATOM | 3251 | HA2  | GLY | 216 | -1.613  | 4.869  | -6.738  | 1.00 | 0.00 | H |
| ATOM | 3252 | HA3  | GLY | 216 | -2.540  | 5.887  | -5.628  | 1.00 | 0.00 | H |
| ATOM | 3253 | N    | THR | 217 | -2.929  | 5.563  | -8.756  | 1.00 | 0.00 | N |
| ATOM | 3254 | CA   | THR | 217 | -3.779  | 5.833  | -9.930  | 1.00 | 0.00 | C |
| ATOM | 3255 | C    | THR | 217 | -4.970  | 4.887  | -10.026 | 1.00 | 0.00 | C |
| ATOM | 3256 | O    | THR | 217 | -4.823  | 3.675  | -9.890  | 1.00 | 0.00 | O |
| ATOM | 3257 | CB   | THR | 217 | -2.944  | 5.840  | -11.208 | 1.00 | 0.00 | C |
| ATOM | 3258 | CG2  | THR | 217 | -2.176  | 4.553  | -11.506 | 1.00 | 0.00 | C |
| ATOM | 3259 | OG1  | THR | 217 | -3.820  | 6.084  | -12.275 | 1.00 | 0.00 | O |
| ATOM | 3260 | H    | THR | 217 | -2.318  | 4.759  | -8.793  | 1.00 | 0.00 | H |
| ATOM | 3261 | HA   | THR | 217 | -4.191  | 6.838  | -9.831  | 1.00 | 0.00 | H |
| ATOM | 3262 | HB   | THR | 217 | -2.224  | 6.660  | -11.137 | 1.00 | 0.00 | H |
| ATOM | 3263 | HG1  | THR | 217 | -3.301  | 6.547  | -12.952 | 1.00 | 0.00 | H |
| ATOM | 3264 | HG21 | THR | 217 | -2.869  | 3.731  | -11.683 | 1.00 | 0.00 | H |
| ATOM | 3265 | HG22 | THR | 217 | -1.562  | 4.711  | -12.394 | 1.00 | 0.00 | H |
| ATOM | 3266 | HG23 | THR | 217 | -1.524  | 4.296  | -10.672 | 1.00 | 0.00 | H |
| ATOM | 3267 | N    | LYS | 218 | -6.155  | 5.447  | -10.255 | 1.00 | 0.00 | N |
| ATOM | 3268 | CA   | LYS | 218 | -7.426  | 4.715  | -10.203 | 1.00 | 0.00 | C |
| ATOM | 3269 | C    | LYS | 218 | -7.864  | 4.211  | -11.593 | 1.00 | 0.00 | C |
| ATOM | 3270 | O    | LYS | 218 | -8.221  | 5.000  | -12.471 | 1.00 | 0.00 | O |
| ATOM | 3271 | CB   | LYS | 218 | -8.474  | 5.625  | -9.548  | 1.00 | 0.00 | C |
| ATOM | 3272 | CG   | LYS | 218 | -9.762  | 4.871  | -9.187  | 1.00 | 0.00 | C |
| ATOM | 3273 | CD   | LYS | 218 | -10.841 | 5.870  | -8.753  | 1.00 | 0.00 | C |
| ATOM | 3274 | CE   | LYS | 218 | -12.159 | 5.143  | -8.458  | 1.00 | 0.00 | C |
| ATOM | 3275 | NZ   | LYS | 218 | -13.319 | 6.032  | -8.703  | 1.00 | 0.00 | N |
| ATOM | 3276 | H    | LYS | 218 | -6.176  | 6.445  | -10.437 | 1.00 | 0.00 | H |
| ATOM | 3277 | HA   | LYS | 218 | -7.303  | 3.842  | -9.559  | 1.00 | 0.00 | H |
| ATOM | 3278 | HB2  | LYS | 218 | -8.055  | 6.058  | -8.636  | 1.00 | 0.00 | H |
| ATOM | 3279 | HB3  | LYS | 218 | -8.709  | 6.439  | -10.234 | 1.00 | 0.00 | H |
| ATOM | 3280 | HG2  | LYS | 218 | -10.125 | 4.315  | -10.056 | 1.00 | 0.00 | H |
| ATOM | 3281 | HG3  | LYS | 218 | -9.559  | 4.178  | -8.370  | 1.00 | 0.00 | H |
| ATOM | 3282 | HD2  | LYS | 218 | -10.516 | 6.437  | -7.879  | 1.00 | 0.00 | H |
| ATOM | 3283 | HD3  | LYS | 218 | -10.988 | 6.572  | -9.573  | 1.00 | 0.00 | H |
| ATOM | 3284 | HE2  | LYS | 218 | -12.239 | 4.301  | -9.155  | 1.00 | 0.00 | H |
| ATOM | 3285 | HE3  | LYS | 218 | -12.157 | 4.754  | -7.437  | 1.00 | 0.00 | H |
| ATOM | 3286 | HZ1  | LYS | 218 | -13.192 | 6.456  | -9.629  | 1.00 | 0.00 | H |
| ATOM | 3287 | HZ2  | LYS | 218 | -14.153 | 5.478  | -8.866  | 1.00 | 0.00 | H |
| ATOM | 3288 | HZ3  | LYS | 218 | -13.449 | 6.746  | -8.010  | 1.00 | 0.00 | H |
| ATOM | 3289 | N    | LEU | 219 | -7.865  | 2.891  | -11.790 | 1.00 | 0.00 | N |
| ATOM | 3290 | CA   | LEU | 219 | -8.383  | 2.227  | -12.986 | 1.00 | 0.00 | C |
| ATOM | 3291 | C    | LEU | 219 | -9.886  | 1.977  | -12.814 | 1.00 | 0.00 | C |
| ATOM | 3292 | O    | LEU | 219 | -10.295 | 1.432  | -11.787 | 1.00 | 0.00 | O |
| ATOM | 3293 | CB   | LEU | 219 | -7.589  | 0.920  | -13.158 | 1.00 | 0.00 | C |
| ATOM | 3294 | CG   | LEU | 219 | -7.865  | 0.142  | -14.457 | 1.00 | 0.00 | C |
| ATOM | 3295 | CD1  | LEU | 219 | -7.442  | 0.941  | -15.698 | 1.00 | 0.00 | C |
| ATOM | 3296 | CD2  | LEU | 219 | -7.093  | -1.185 | -14.408 | 1.00 | 0.00 | C |
| ATOM | 3297 | H    | LEU | 219 | -7.560  | 2.299  | -11.028 | 1.00 | 0.00 | H |
| ATOM | 3298 | HA   | LEU | 219 | -8.235  | 2.872  | -13.854 | 1.00 | 0.00 | H |
| ATOM | 3299 | HB2  | LEU | 219 | -6.523  | 1.150  | -13.114 | 1.00 | 0.00 | H |
| ATOM | 3300 | HB3  | LEU | 219 | -7.819  | 0.271  | -12.314 | 1.00 | 0.00 | H |
| ATOM | 3301 | HG   | LEU | 219 | -8.929  | -0.080 | -14.527 | 1.00 | 0.00 | H |
| ATOM | 3302 | HD11 | LEU | 219 | -6.407  | 1.268  | -15.599 | 1.00 | 0.00 | H |

|      |      |      |     |     |         |        |         |      |      |   |
|------|------|------|-----|-----|---------|--------|---------|------|------|---|
| ATOM | 3303 | HD12 | LEU | 219 | -7.532  | 0.317  | -16.586 | 1.00 | 0.00 | H |
| ATOM | 3304 | HD13 | LEU | 219 | -8.091  | 1.806  | -15.826 | 1.00 | 0.00 | H |
| ATOM | 3305 | HD21 | LEU | 219 | -7.460  | -1.796 | -13.584 | 1.00 | 0.00 | H |
| ATOM | 3306 | HD22 | LEU | 219 | -7.235  | -1.738 | -15.336 | 1.00 | 0.00 | H |
| ATOM | 3307 | HD23 | LEU | 219 | -6.027  | -0.996 | -14.271 | 1.00 | 0.00 | H |
| ATOM | 3308 | N    | GLU | 220 | -10.686 | 2.342  | -13.819 | 1.00 | 0.00 | N |
| ATOM | 3309 | CA   | GLU | 220 | -12.151 | 2.254  | -13.842 | 1.00 | 0.00 | C |
| ATOM | 3310 | C    | GLU | 220 | -12.635 | 1.762  | -15.213 | 1.00 | 0.00 | C |
| ATOM | 3311 | O    | GLU | 220 | -11.990 | 1.992  | -16.238 | 1.00 | 0.00 | O |
| ATOM | 3312 | CB   | GLU | 220 | -12.790 | 3.617  | -13.516 | 1.00 | 0.00 | C |
| ATOM | 3313 | CG   | GLU | 220 | -12.247 | 4.179  | -12.199 | 1.00 | 0.00 | C |
| ATOM | 3314 | CD   | GLU | 220 | -13.193 | 5.161  | -11.531 | 1.00 | 0.00 | C |
| ATOM | 3315 | OE1  | GLU | 220 | -12.820 | 6.347  | -11.374 | 1.00 | 0.00 | O |
| ATOM | 3316 | OE2  | GLU | 220 | -14.181 | 4.706  | -10.914 | 1.00 | 0.00 | O |
| ATOM | 3317 | H    | GLU | 220 | -10.268 | 2.799  | -14.622 | 1.00 | 0.00 | H |
| ATOM | 3318 | HA   | GLU | 220 | -12.478 | 1.538  | -13.089 | 1.00 | 0.00 | H |
| ATOM | 3319 | HB2  | GLU | 220 | -12.599 | 4.328  | -14.324 | 1.00 | 0.00 | H |
| ATOM | 3320 | HB3  | GLU | 220 | -13.868 | 3.476  | -13.436 | 1.00 | 0.00 | H |
| ATOM | 3321 | HG2  | GLU | 220 | -12.101 | 3.357  | -11.496 | 1.00 | 0.00 | H |
| ATOM | 3322 | HG3  | GLU | 220 | -11.284 | 4.659  | -12.383 | 1.00 | 0.00 | H |
| ATOM | 3323 | N    | ILE | 221 | -13.761 | 1.046  | -15.257 | 1.00 | 0.00 | N |
| ATOM | 3324 | CA   | ILE | 221 | -14.154 | 0.257  | -16.433 | 1.00 | 0.00 | C |
| ATOM | 3325 | C    | ILE | 221 | -14.970 | 1.058  | -17.468 | 1.00 | 0.00 | C |
| ATOM | 3326 | O    | ILE | 221 | -16.006 | 1.637  | -17.160 | 1.00 | 0.00 | O |
| ATOM | 3327 | CB   | ILE | 221 | -14.799 | -1.074 | -15.985 | 1.00 | 0.00 | C |
| ATOM | 3328 | CG1  | ILE | 221 | -14.885 | -2.058 | -17.169 | 1.00 | 0.00 | C |
| ATOM | 3329 | CG2  | ILE | 221 | -16.158 | -0.890 | -15.283 | 1.00 | 0.00 | C |
| ATOM | 3330 | CD1  | ILE | 221 | -15.191 | -3.498 | -16.734 | 1.00 | 0.00 | C |
| ATOM | 3331 | H    | ILE | 221 | -14.344 | 0.993  | -14.434 | 1.00 | 0.00 | H |
| ATOM | 3332 | HA   | ILE | 221 | -13.226 | -0.016 | -16.926 | 1.00 | 0.00 | H |
| ATOM | 3333 | HB   | ILE | 221 | -14.115 | -1.517 | -15.257 | 1.00 | 0.00 | H |
| ATOM | 3334 | HG12 | ILE | 221 | -15.652 | -1.723 | -17.869 | 1.00 | 0.00 | H |
| ATOM | 3335 | HG13 | ILE | 221 | -13.927 | -2.071 | -17.692 | 1.00 | 0.00 | H |
| ATOM | 3336 | HG21 | ILE | 221 | -16.919 | -0.587 | -16.004 | 1.00 | 0.00 | H |
| ATOM | 3337 | HG22 | ILE | 221 | -16.468 | -1.823 | -14.813 | 1.00 | 0.00 | H |
| ATOM | 3338 | HG23 | ILE | 221 | -16.087 | -0.130 | -14.506 | 1.00 | 0.00 | H |
| ATOM | 3339 | HD11 | ILE | 221 | -16.193 | -3.564 | -16.313 | 1.00 | 0.00 | H |
| ATOM | 3340 | HD12 | ILE | 221 | -15.133 | -4.156 | -17.598 | 1.00 | 0.00 | H |
| ATOM | 3341 | HD13 | ILE | 221 | -14.459 | -3.826 | -15.995 | 1.00 | 0.00 | H |
| ATOM | 3342 | N    | LYS | 222 | -14.510 | 1.096  | -18.720 | 1.00 | 0.00 | N |
| ATOM | 3343 | CA   | LYS | 222 | -15.182 | 1.785  | -19.827 | 1.00 | 0.00 | C |
| ATOM | 3344 | C    | LYS | 222 | -16.345 | 0.940  | -20.386 | 1.00 | 0.00 | C |
| ATOM | 3345 | O    | LYS | 222 | -16.158 | -0.231 | -20.722 | 1.00 | 0.00 | O |
| ATOM | 3346 | CB   | LYS | 222 | -14.124 | 2.121  | -20.896 | 1.00 | 0.00 | C |
| ATOM | 3347 | CG   | LYS | 222 | -14.574 | 3.057  | -22.035 | 1.00 | 0.00 | C |
| ATOM | 3348 | CD   | LYS | 222 | -13.518 | 3.155  | -23.157 | 1.00 | 0.00 | C |
| ATOM | 3349 | CE   | LYS | 222 | -12.179 | 3.747  | -22.683 | 1.00 | 0.00 | C |
| ATOM | 3350 | NZ   | LYS | 222 | -10.989 | 3.129  | -23.327 | 1.00 | 0.00 | N |
| ATOM | 3351 | H    | LYS | 222 | -13.645 | 0.602  | -18.913 | 1.00 | 0.00 | H |
| ATOM | 3352 | HA   | LYS | 222 | -15.597 | 2.721  | -19.441 | 1.00 | 0.00 | H |
| ATOM | 3353 | HB2  | LYS | 222 | -13.274 | 2.576  | -20.391 | 1.00 | 0.00 | H |
| ATOM | 3354 | HB3  | LYS | 222 | -13.794 | 1.188  | -21.345 | 1.00 | 0.00 | H |
| ATOM | 3355 | HG2  | LYS | 222 | -15.496 | 2.670  | -22.471 | 1.00 | 0.00 | H |
| ATOM | 3356 | HG3  | LYS | 222 | -14.776 | 4.052  | -21.632 | 1.00 | 0.00 | H |
| ATOM | 3357 | HD2  | LYS | 222 | -13.351 | 2.159  | -23.561 | 1.00 | 0.00 | H |
| ATOM | 3358 | HD3  | LYS | 222 | -13.914 | 3.770  | -23.966 | 1.00 | 0.00 | H |
| ATOM | 3359 | HE2  | LYS | 222 | -12.180 | 4.829  | -22.838 | 1.00 | 0.00 | H |

|      |      |     |     |     |         |         |         |      |      |   |
|------|------|-----|-----|-----|---------|---------|---------|------|------|---|
| ATOM | 3360 | HE3 | LYS | 222 | -12.092 | 3.582   | -21.611 | 1.00 | 0.00 | H |
| ATOM | 3361 | HZ1 | LYS | 222 | -10.909 | 3.309   | -24.316 | 1.00 | 0.00 | H |
| ATOM | 3362 | HZ2 | LYS | 222 | -10.134 | 3.426   | -22.878 | 1.00 | 0.00 | H |
| ATOM | 3363 | HZ3 | LYS | 222 | -10.989 | 2.111   | -23.254 | 1.00 | 0.00 | H |
| ATOM | 3364 | N   | GLY | 223 | -17.516 | 1.570   | -20.497 | 1.00 | 0.00 | N |
| ATOM | 3365 | CA  | GLY | 223 | -18.705 | 1.087   | -21.205 | 1.00 | 0.00 | C |
| ATOM | 3366 | C   | GLY | 223 | -19.332 | 2.214   | -22.024 | 1.00 | 0.00 | C |
| ATOM | 3367 | O   | GLY | 223 | -18.622 | 3.123   | -22.459 | 1.00 | 0.00 | O |
| ATOM | 3368 | H   | GLY | 223 | -17.557 | 2.528   | -20.181 | 1.00 | 0.00 | H |
| ATOM | 3369 | HA2 | GLY | 223 | -18.460 | 0.255   | -21.867 | 1.00 | 0.00 | H |
| ATOM | 3370 | HA3 | GLY | 223 | -19.443 | 0.749   | -20.477 | 1.00 | 0.00 | H |
| ATOM | 3371 | N   | ALA | 224 | -20.647 | 2.160   | -22.199 | 1.00 | 0.00 | N |
| ATOM | 3372 | CA  | ALA | 224 | -21.504 | 3.155   | -22.859 | 1.00 | 0.00 | C |
| ATOM | 3373 | C   | ALA | 224 | -22.981 | 2.944   | -22.455 | 1.00 | 0.00 | C |
| ATOM | 3374 | O   | ALA | 224 | -23.778 | 3.883   | -22.691 | 1.00 | 0.00 | O |
| ATOM | 3375 | CB  | ALA | 224 | -21.317 | 3.057   | -24.378 | 1.00 | 0.00 | C |
| ATOM | 3376 | OXT | ALA | 224 | -23.272 | 1.857   | -21.908 | 1.00 | 0.00 | O |
| ATOM | 3377 | H   | ALA | 224 | -21.194 | 1.423   | -21.769 | 1.00 | 0.00 | H |
| ATOM | 3378 | HA  | ALA | 224 | -21.232 | 4.156   | -22.529 | 1.00 | 0.00 | H |
| ATOM | 3379 | HB1 | ALA | 224 | -21.616 | 2.064   | -24.718 | 1.00 | 0.00 | H |
| ATOM | 3380 | HB2 | ALA | 224 | -21.947 | 3.803   | -24.863 | 1.00 | 0.00 | H |
| ATOM | 3381 | HB3 | ALA | 224 | -20.276 | 3.239   | -24.640 | 1.00 | 0.00 | H |
| TER  | 3382 |     | ALA | 224 |         |         |         |      |      |   |
| ATOM | 3383 | O   | OME | 1   | 3.267   | -15.600 | 0.185   | 1.00 | 0.00 | O |
| ATOM | 3384 | CH3 | OME | 1   | 4.099   | -16.764 | -0.091  | 1.00 | 0.00 | C |
| ATOM | 3385 | H1  | OME | 1   | 3.848   | -17.568 | 0.587   | 1.00 | 0.00 | H |
| ATOM | 3386 | H2  | OME | 1   | 3.933   | -17.105 | -1.104  | 1.00 | 0.00 | H |
| ATOM | 3387 | H3  | OME | 1   | 5.145   | -16.520 | 0.022   | 1.00 | 0.00 | H |
| ATOM | 3388 | C1  | 6MA | 2   | 3.399   | -15.082 | 1.550   | 1.00 | 0.00 | C |
| ATOM | 3389 | C2  | 6MA | 2   | 2.231   | -14.109 | 1.855   | 1.00 | 0.00 | C |
| ATOM | 3390 | O2  | 6MA | 2   | 2.170   | -13.820 | 3.291   | 1.00 | 0.00 | O |
| ATOM | 3391 | C3  | 6MA | 2   | 2.402   | -12.831 | 0.999   | 1.00 | 0.00 | C |
| ATOM | 3392 | O3  | 6MA | 2   | 1.289   | -11.926 | 1.232   | 1.00 | 0.00 | O |
| ATOM | 3393 | C4  | 6MA | 2   | 3.765   | -12.133 | 1.236   | 1.00 | 0.00 | C |
| ATOM | 3394 | O4  | 6MA | 2   | 3.914   | -11.049 | 0.274   | 1.00 | 0.00 | O |
| ATOM | 3395 | C5  | 6MA | 2   | 4.944   | -13.121 | 1.030   | 1.00 | 0.00 | C |
| ATOM | 3396 | O5  | 6MA | 2   | 4.699   | -14.409 | 1.752   | 1.00 | 0.00 | O |
| ATOM | 3397 | C6  | 6MA | 2   | 6.281   | -12.512 | 1.517   | 1.00 | 0.00 | C |
| ATOM | 3398 | O6  | 6MA | 2   | 7.442   | -13.047 | 0.785   | 1.00 | 0.00 | O |
| ATOM | 3399 | H1  | 6MA | 2   | 3.328   | -15.919 | 2.237   | 1.00 | 0.00 | H |
| ATOM | 3400 | H2  | 6MA | 2   | 1.296   | -14.596 | 1.577   | 1.00 | 0.00 | H |
| ATOM | 3401 | H3  | 6MA | 2   | 2.352   | -13.129 | -0.051  | 1.00 | 0.00 | H |
| ATOM | 3402 | H4  | 6MA | 2   | 3.800   | -11.725 | 2.249   | 1.00 | 0.00 | H |
| ATOM | 3403 | H5  | 6MA | 2   | 5.026   | -13.342 | -0.034  | 1.00 | 0.00 | H |
| ATOM | 3404 | H2O | 6MA | 2   | 1.325   | -13.333 | 3.455   | 1.00 | 0.00 | H |
| ATOM | 3405 | H3O | 6MA | 2   | 1.278   | -11.257 | 0.508   | 1.00 | 0.00 | H |
| ATOM | 3406 | H61 | 6MA | 2   | 6.405   | -12.664 | 2.591   | 1.00 | 0.00 | H |
| ATOM | 3407 | H62 | 6MA | 2   | 6.274   | -11.433 | 1.351   | 1.00 | 0.00 | H |
| ATOM | 3408 | H4O | 6MA | 2   | 3.414   | -10.279 | 0.614   | 1.00 | 0.00 | H |
| ATOM | 3409 | P   | PHO | 3   | 8.065   | -14.477 | 1.078   | 1.00 | 0.00 | P |
| ATOM | 3410 | O4  | PHO | 3   | 9.566   | -14.283 | 0.617   | 1.00 | 0.00 | O |
| ATOM | 3411 | O5  | PHO | 3   | 7.454   | -15.444 | 0.152   | 1.00 | 0.00 | O |
| ATOM | 3412 | OP  | PHO | 3   | 8.039   | -14.754 | 2.529   | 1.00 | 0.00 | O |
| ATOM | 3413 | C1  | 2MA | 4   | 10.399  | -13.398 | 1.423   | 1.00 | 0.00 | C |
| ATOM | 3414 | C2  | 2MA | 4   | 11.372  | -12.593 | 0.535   | 1.00 | 0.00 | C |
| ATOM | 3415 | O2  | 2MA | 4   | 12.015  | -11.541 | 1.375   | 1.00 | 0.00 | O |
| ATOM | 3416 | C3  | 2MA | 4   | 12.448  | -13.512 | -0.074  | 1.00 | 0.00 | C |

|      |      |     |     |   |        |         |        |      |      |   |
|------|------|-----|-----|---|--------|---------|--------|------|------|---|
| ATOM | 3417 | O3  | 2MA | 4 | 13.363 | -12.729 | -0.898 | 1.00 | 0.00 | O |
| ATOM | 3418 | C4  | 2MA | 4 | 13.234 | -14.265 | 1.027  | 1.00 | 0.00 | C |
| ATOM | 3419 | O4  | 2MA | 4 | 14.162 | -15.207 | 0.403  | 1.00 | 0.00 | O |
| ATOM | 3420 | C5  | 2MA | 4 | 12.276 | -15.044 | 1.964  | 1.00 | 0.00 | C |
| ATOM | 3421 | O5  | 2MA | 4 | 11.141 | -14.187 | 2.426  | 1.00 | 0.00 | O |
| ATOM | 3422 | C6  | 2MA | 4 | 13.012 | -15.581 | 3.210  | 1.00 | 0.00 | C |
| ATOM | 3423 | O6  | 2MA | 4 | 12.300 | -16.704 | 3.767  | 1.00 | 0.00 | O |
| ATOM | 3424 | H1  | 2MA | 4 | 9.772  | -12.678 | 1.949  | 1.00 | 0.00 | H |
| ATOM | 3425 | H2  | 2MA | 4 | 10.809 | -12.129 | -0.275 | 1.00 | 0.00 | H |
| ATOM | 3426 | H3  | 2MA | 4 | 11.963 | -14.240 | -0.722 | 1.00 | 0.00 | H |
| ATOM | 3427 | H4  | 2MA | 4 | 13.810 | -13.548 | 1.615  | 1.00 | 0.00 | H |
| ATOM | 3428 | H5  | 2MA | 4 | 11.859 | -15.881 | 1.401  | 1.00 | 0.00 | H |
| ATOM | 3429 | H3O | 2MA | 4 | 12.871 | -12.394 | -1.685 | 1.00 | 0.00 | H |
| ATOM | 3430 | H61 | 2MA | 4 | 13.109 | -14.801 | 3.965  | 1.00 | 0.00 | H |
| ATOM | 3431 | H62 | 2MA | 4 | 14.015 | -15.913 | 2.951  | 1.00 | 0.00 | H |
| ATOM | 3432 | H4O | 2MA | 4 | 14.704 | -14.705 | -0.245 | 1.00 | 0.00 | H |
| ATOM | 3433 | H6O | 2MA | 4 | 12.863 | -17.089 | 4.470  | 1.00 | 0.00 | H |
| ATOM | 3434 | C1  | 2MB | 5 | 11.697 | -10.148 | 1.030  | 1.00 | 0.00 | C |
| ATOM | 3435 | C2  | 2MB | 5 | 12.137 | -9.225  | 2.192  | 1.00 | 0.00 | C |
| ATOM | 3436 | O2  | 2MB | 5 | 13.537 | -9.553  | 2.595  | 1.00 | 0.00 | O |
| ATOM | 3437 | C3  | 2MB | 5 | 12.036 | -7.736  | 1.805  | 1.00 | 0.00 | C |
| ATOM | 3438 | O3  | 2MB | 5 | 12.557 | -6.922  | 2.904  | 1.00 | 0.00 | O |
| ATOM | 3439 | C4  | 2MB | 5 | 12.743 | -7.426  | 0.453  | 1.00 | 0.00 | C |
| ATOM | 3440 | O4  | 2MB | 5 | 12.493 | -6.043  | 0.076  | 1.00 | 0.00 | O |
| ATOM | 3441 | C5  | 2MB | 5 | 12.220 | -8.365  | -0.657 | 1.00 | 0.00 | C |
| ATOM | 3442 | O5  | 2MB | 5 | 12.409 | -9.769  | -0.203 | 1.00 | 0.00 | O |
| ATOM | 3443 | C6  | 2MB | 5 | 12.898 | -8.166  | -2.023 | 1.00 | 0.00 | C |
| ATOM | 3444 | O6  | 2MB | 5 | 12.161 | -8.882  | -3.029 | 1.00 | 0.00 | O |
| ATOM | 3445 | H1  | 2MB | 5 | 10.620 | -10.054 | 0.876  | 1.00 | 0.00 | H |
| ATOM | 3446 | H2  | 2MB | 5 | 11.462 | -9.399  | 3.033  | 1.00 | 0.00 | H |
| ATOM | 3447 | H3  | 2MB | 5 | 10.977 | -7.502  | 1.698  | 1.00 | 0.00 | H |
| ATOM | 3448 | H4  | 2MB | 5 | 13.819 | -7.566  | 0.562  | 1.00 | 0.00 | H |
| ATOM | 3449 | H5  | 2MB | 5 | 11.154 | -8.188  | -0.786 | 1.00 | 0.00 | H |
| ATOM | 3450 | H3O | 2MB | 5 | 13.529 | -7.040  | 2.951  | 1.00 | 0.00 | H |
| ATOM | 3451 | H61 | 2MB | 5 | 12.911 | -7.112  | -2.296 | 1.00 | 0.00 | H |
| ATOM | 3452 | H62 | 2MB | 5 | 13.924 | -8.525  | -1.994 | 1.00 | 0.00 | H |
| ATOM | 3453 | H4O | 2MB | 5 | 11.523 | -5.955  | -0.077 | 1.00 | 0.00 | H |
| ATOM | 3454 | H6O | 2MB | 5 | 12.558 | -8.713  | -3.911 | 1.00 | 0.00 | H |
| ATOM | 3455 | C1  | 0MB | 6 | 13.625 | -10.264 | 3.881  | 1.00 | 0.00 | C |
| ATOM | 3456 | C2  | 0MB | 6 | 14.940 | -11.072 | 3.954  | 1.00 | 0.00 | C |
| ATOM | 3457 | O2  | 0MB | 6 | 16.091 | -10.174 | 3.876  | 1.00 | 0.00 | O |
| ATOM | 3458 | C3  | 0MB | 6 | 14.928 | -11.872 | 5.274  | 1.00 | 0.00 | C |
| ATOM | 3459 | O3  | 0MB | 6 | 16.136 | -12.680 | 5.388  | 1.00 | 0.00 | O |
| ATOM | 3460 | C4  | 0MB | 6 | 14.762 | -10.951 | 6.513  | 1.00 | 0.00 | C |
| ATOM | 3461 | O4  | 0MB | 6 | 14.479 | -11.771 | 7.689  | 1.00 | 0.00 | O |
| ATOM | 3462 | C5  | 0MB | 6 | 13.603 | -9.927  | 6.373  | 1.00 | 0.00 | C |
| ATOM | 3463 | O5  | 0MB | 6 | 13.567 | -9.315  | 5.015  | 1.00 | 0.00 | O |
| ATOM | 3464 | C6  | 0MB | 6 | 13.710 | -8.801  | 7.416  | 1.00 | 0.00 | C |
| ATOM | 3465 | O6  | 0MB | 6 | 13.550 | -9.345  | 8.745  | 1.00 | 0.00 | O |
| ATOM | 3466 | H1  | 0MB | 6 | 12.787 | -10.957 | 3.949  | 1.00 | 0.00 | H |
| ATOM | 3467 | H2  | 0MB | 6 | 14.984 | -11.771 | 3.120  | 1.00 | 0.00 | H |
| ATOM | 3468 | H3  | 0MB | 6 | 14.082 | -12.559 | 5.235  | 1.00 | 0.00 | H |
| ATOM | 3469 | H4  | 0MB | 6 | 15.696 | -10.414 | 6.678  | 1.00 | 0.00 | H |
| ATOM | 3470 | H5  | 0MB | 6 | 12.654 | -10.439 | 6.525  | 1.00 | 0.00 | H |
| ATOM | 3471 | H2O | 0MB | 6 | 16.050 | -9.704  | 3.018  | 1.00 | 0.00 | H |
| ATOM | 3472 | H3O | 0MB | 6 | 16.236 | -13.261 | 4.605  | 1.00 | 0.00 | H |
| ATOM | 3473 | H61 | 0MB | 6 | 14.684 | -8.318  | 7.343  | 1.00 | 0.00 | H |



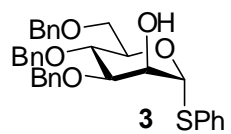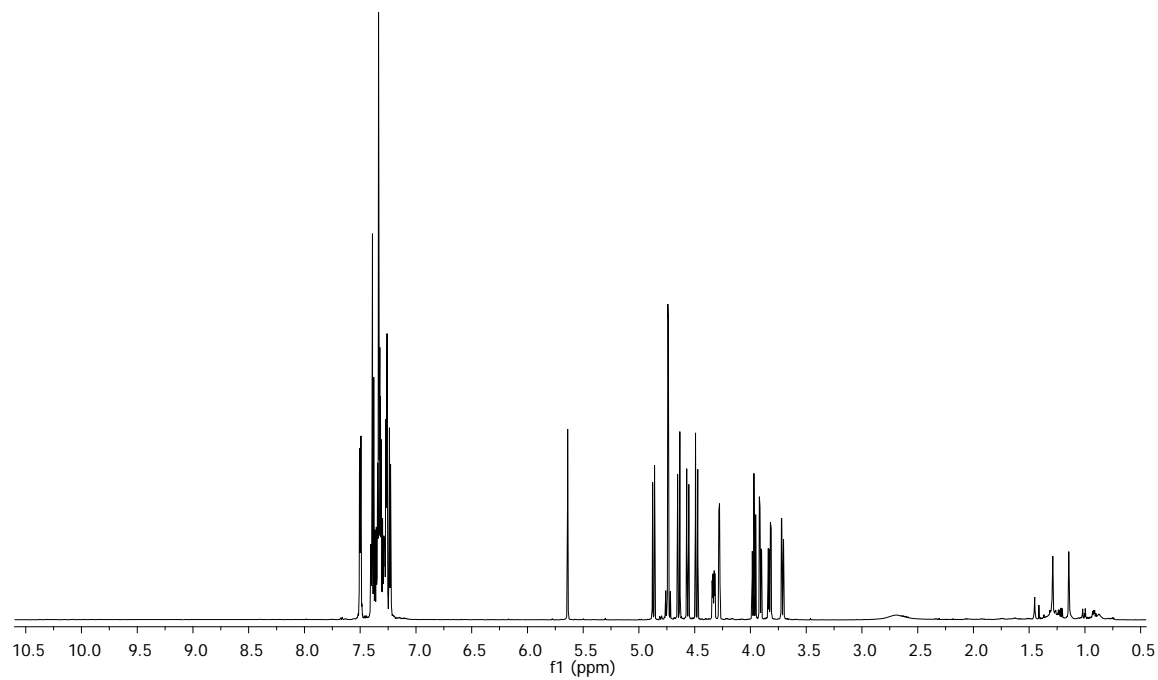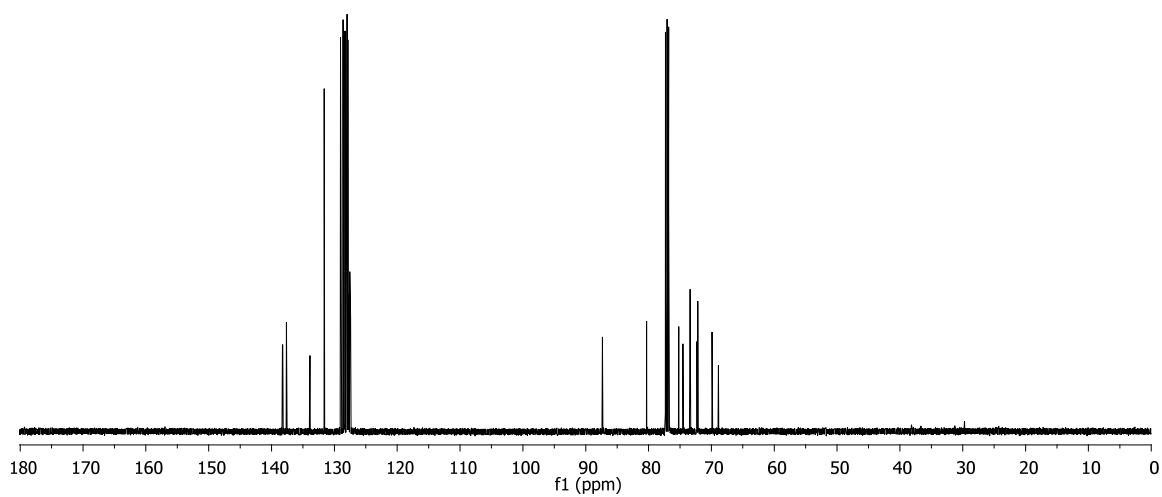



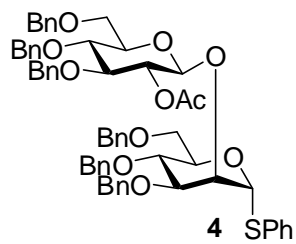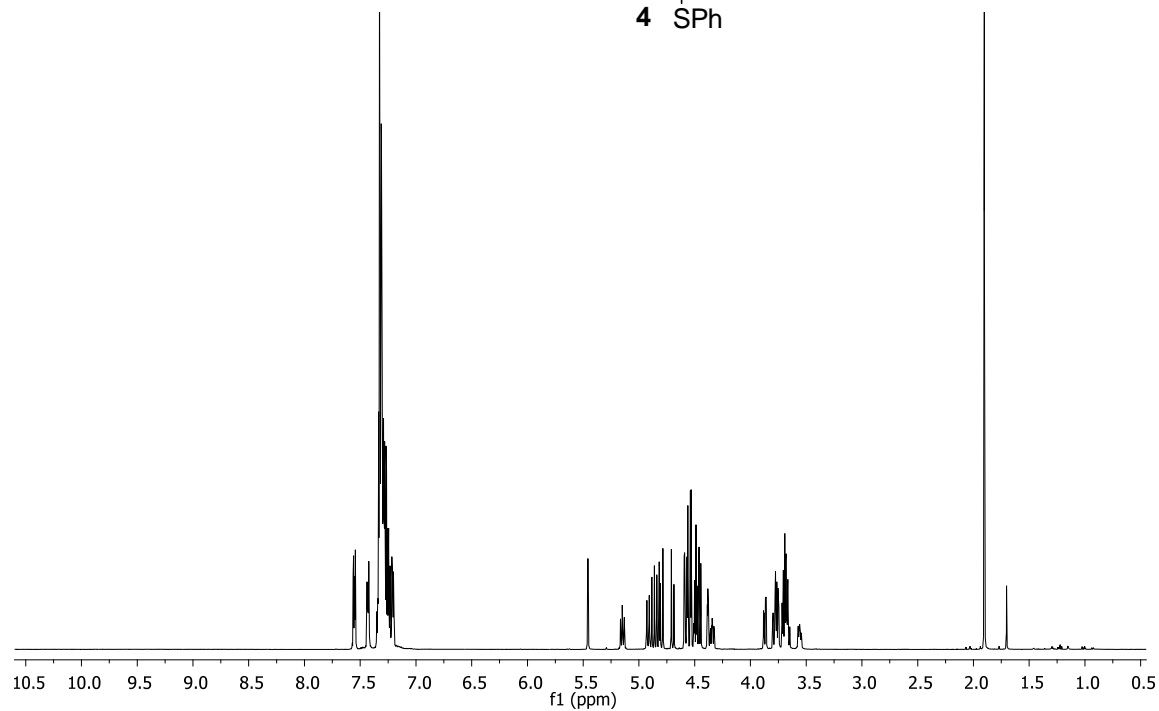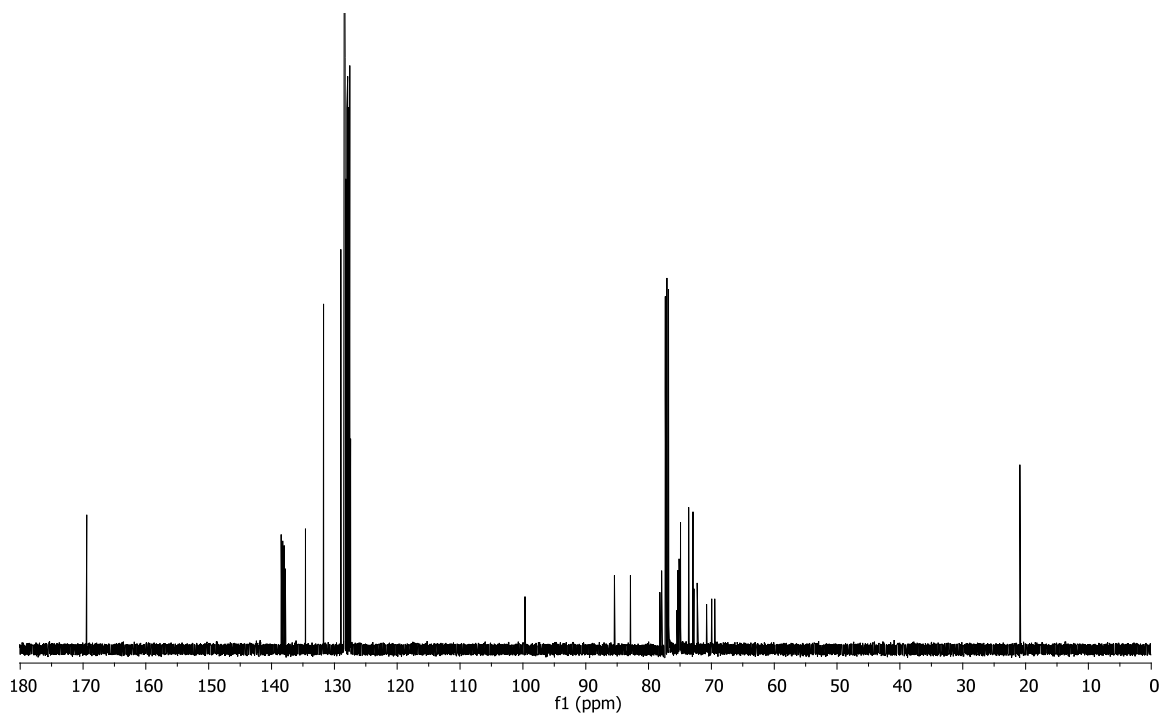

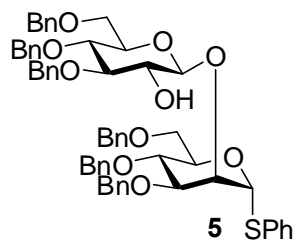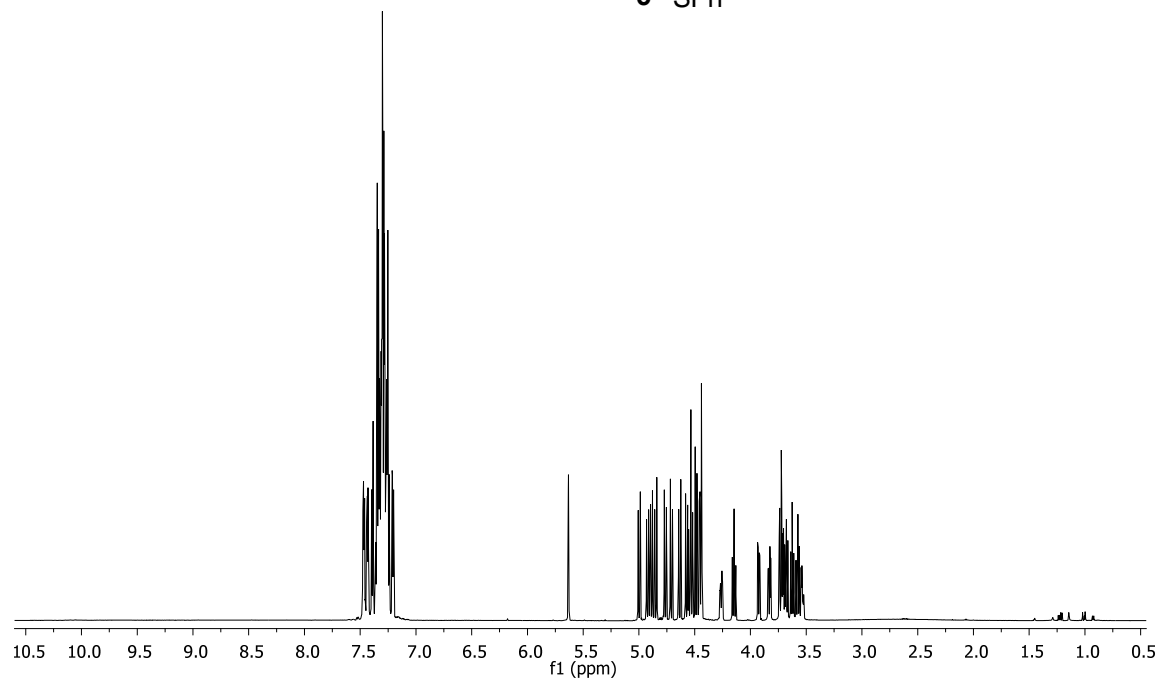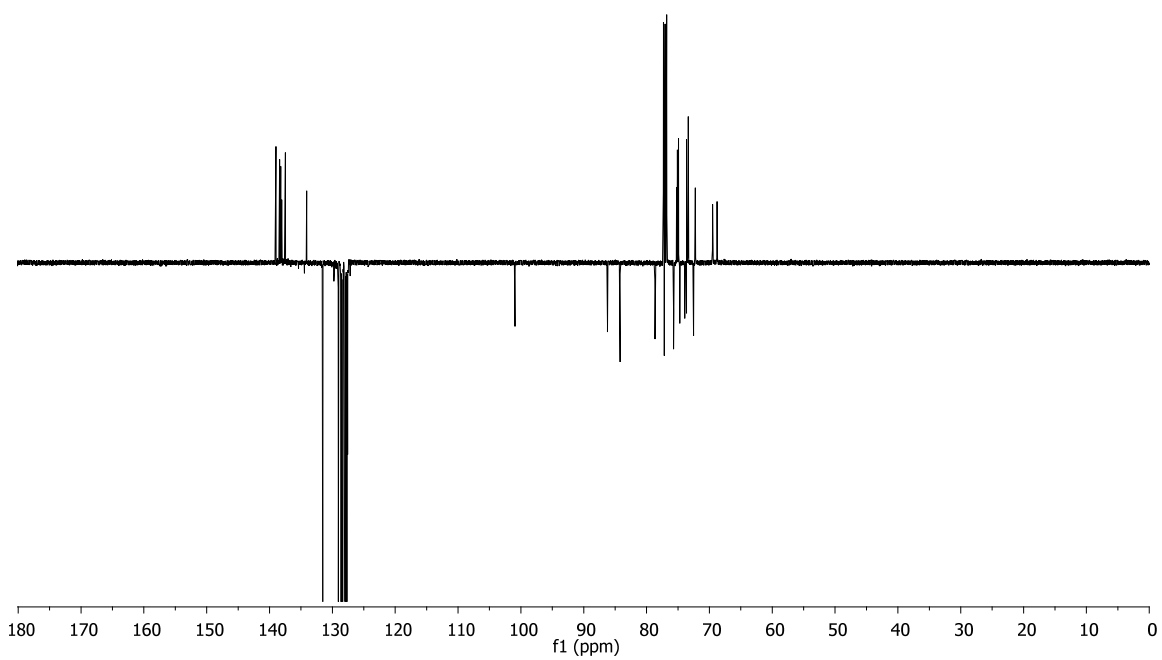

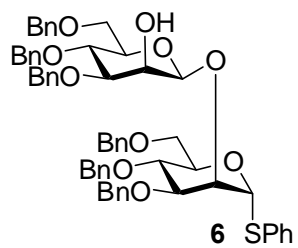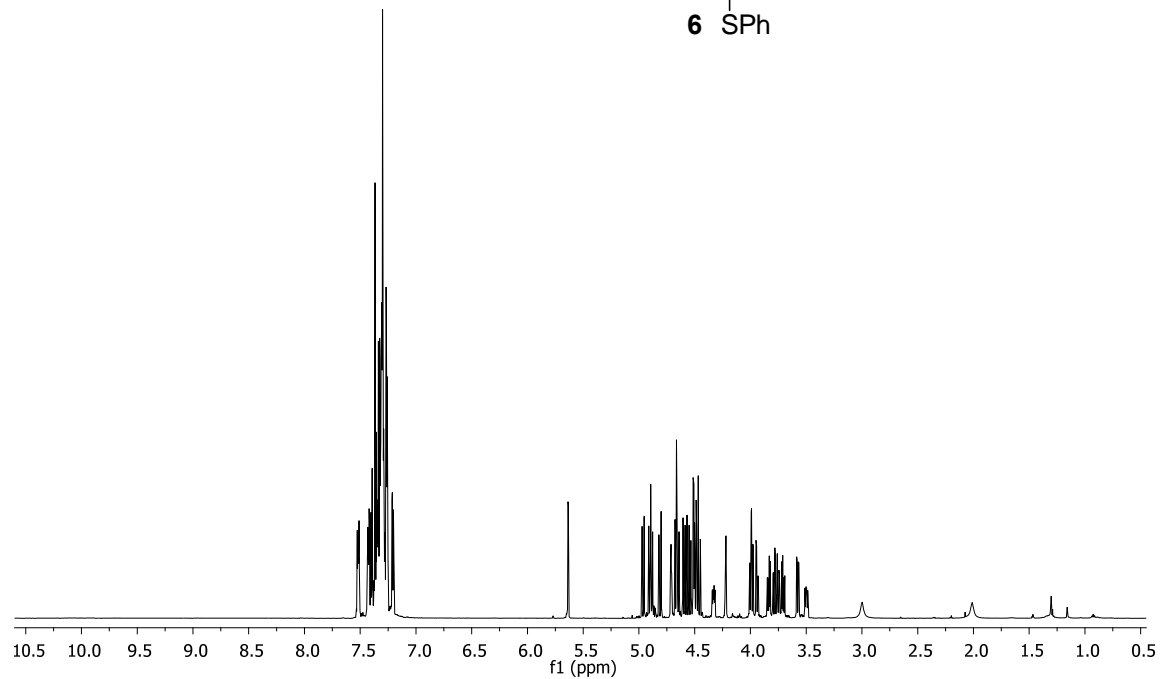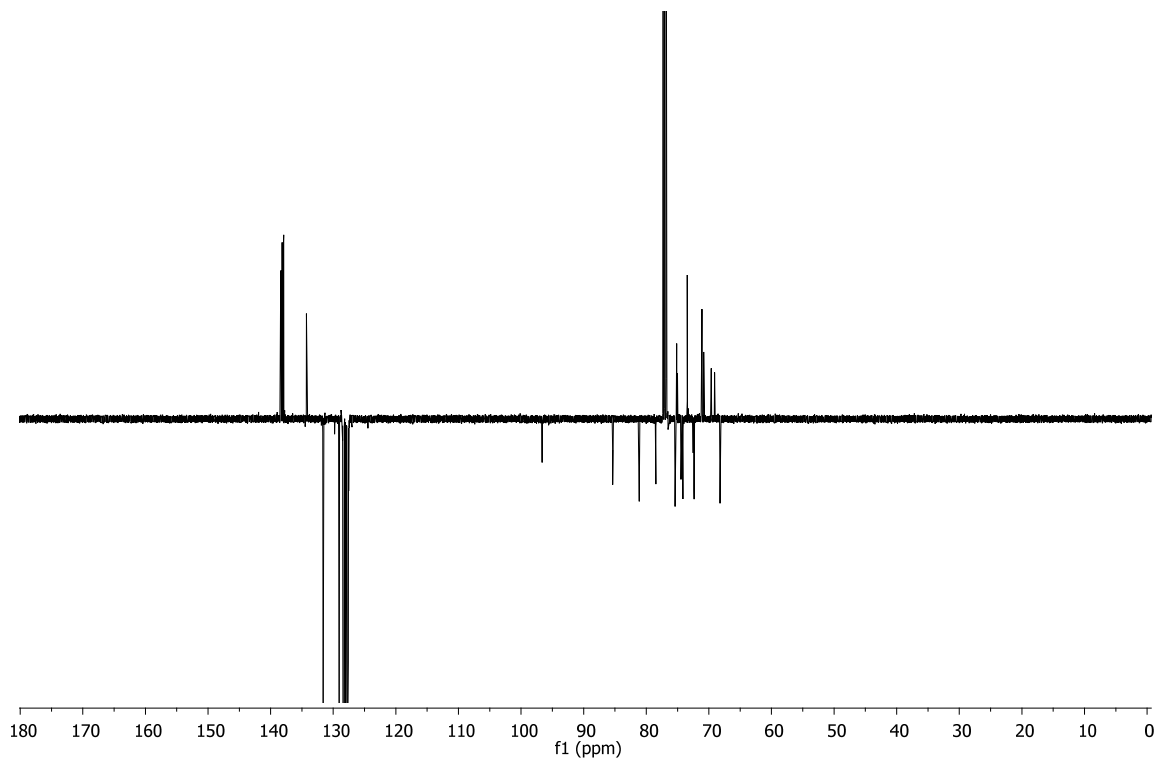

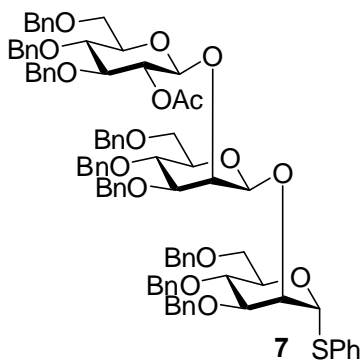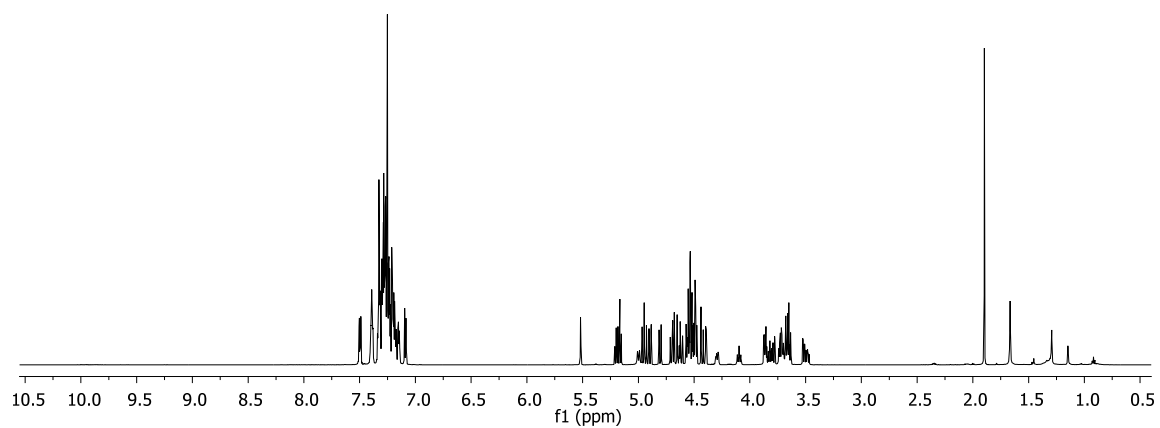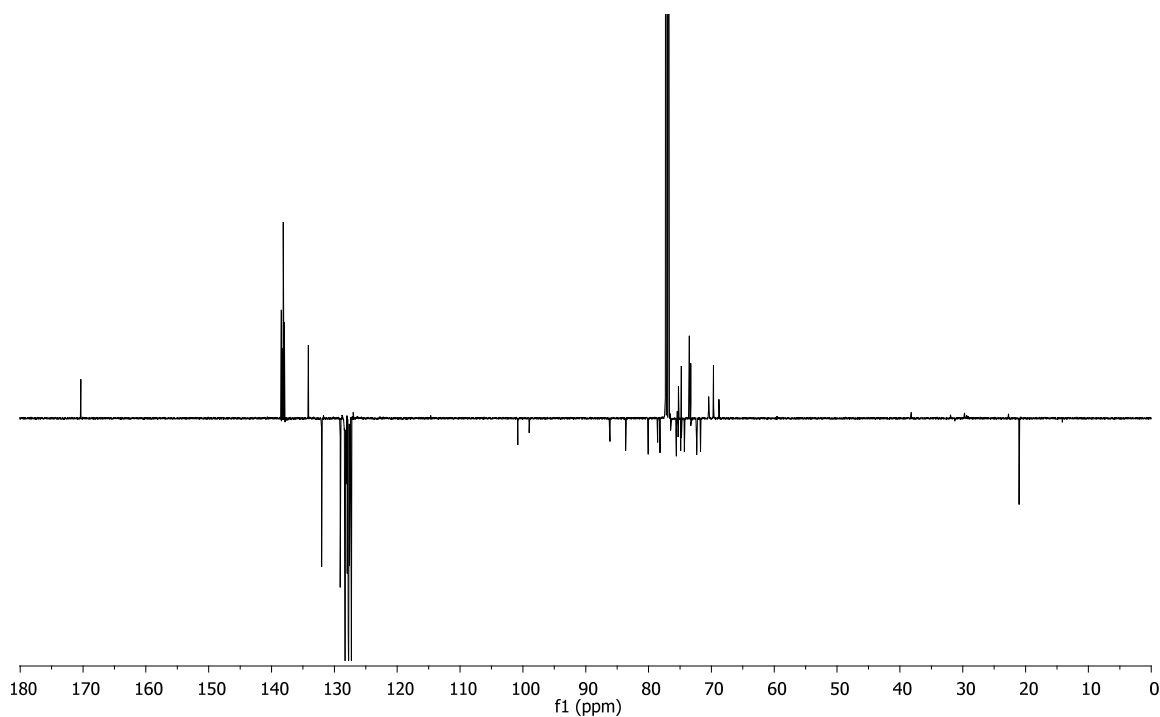

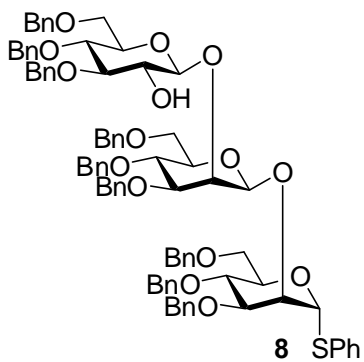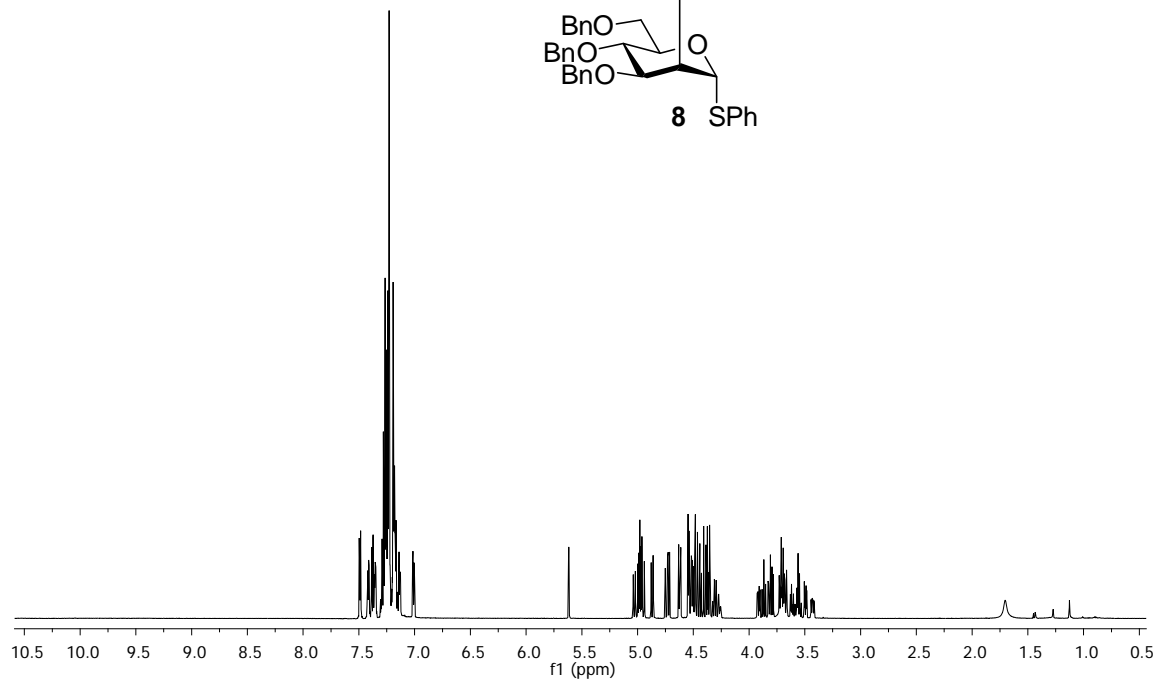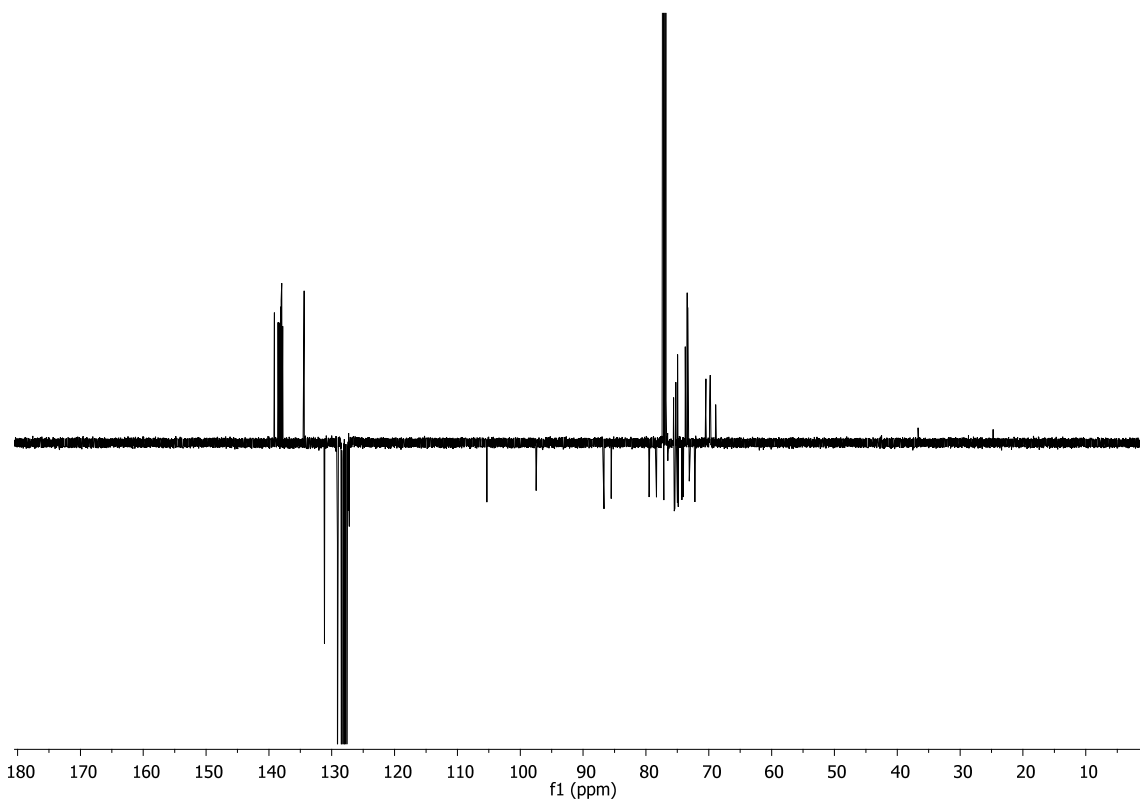

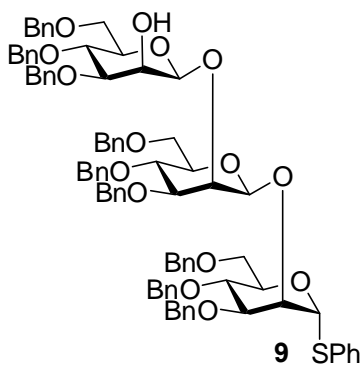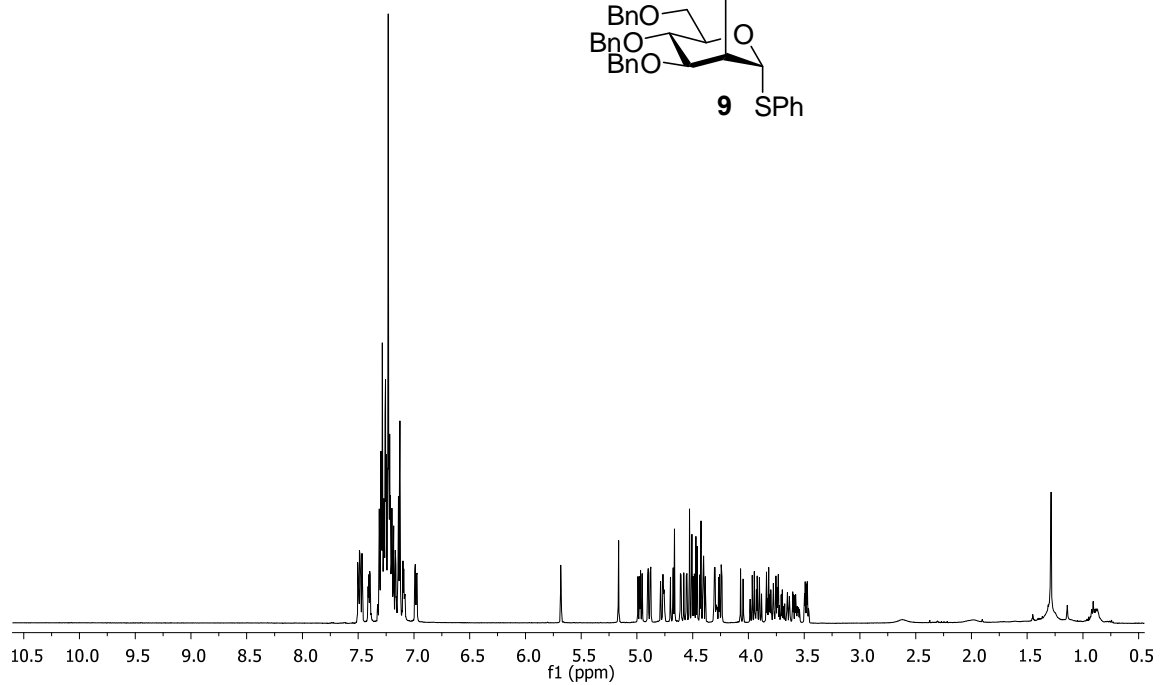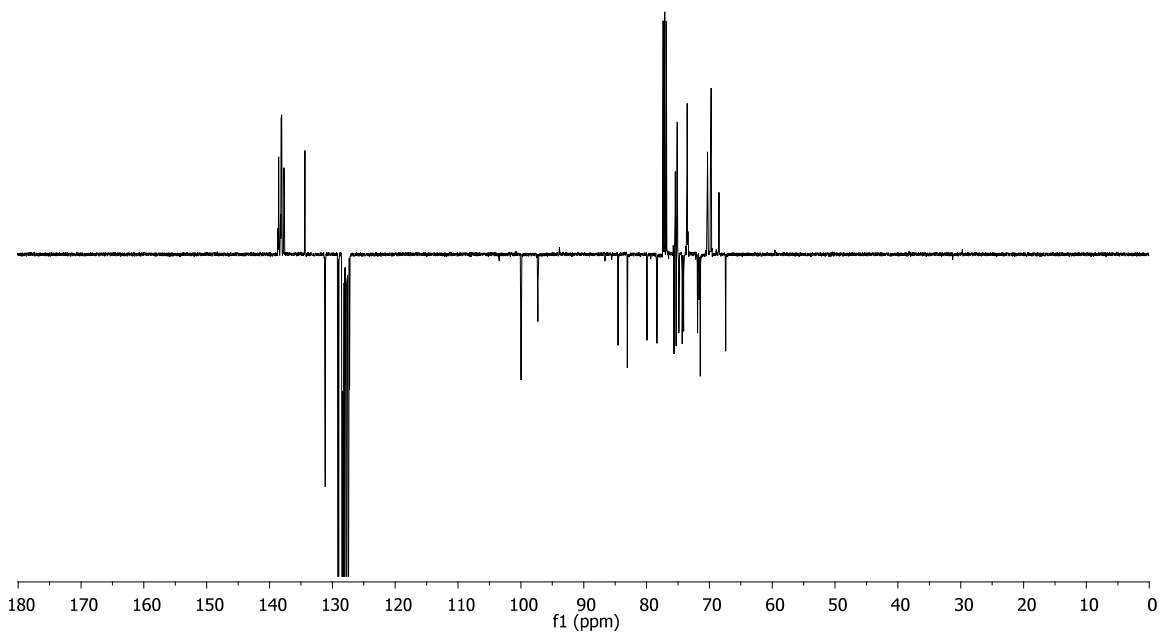

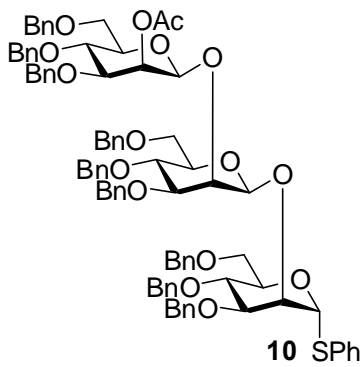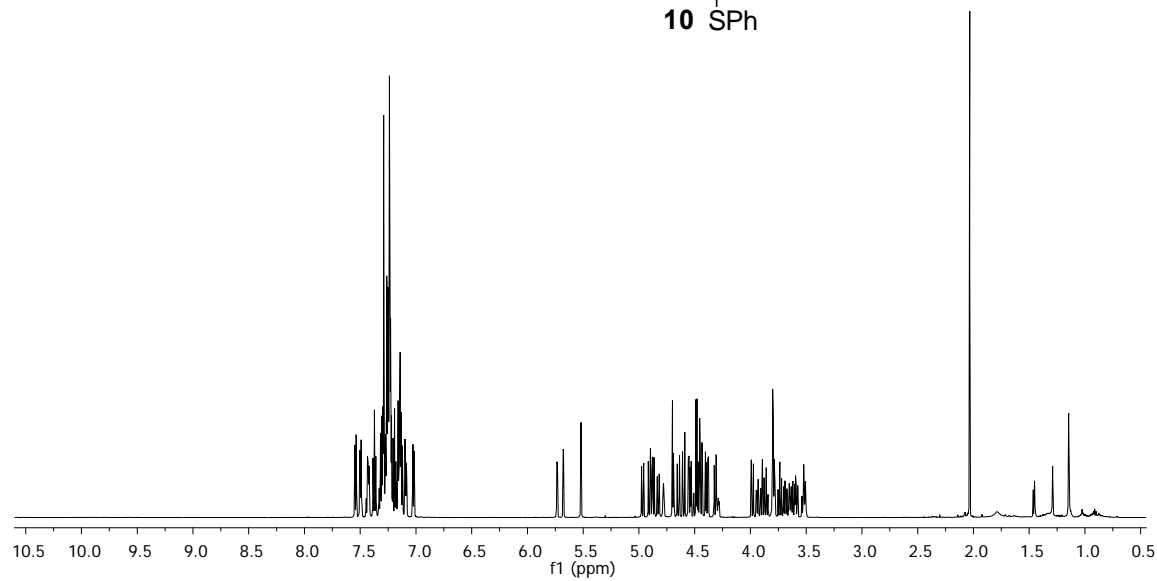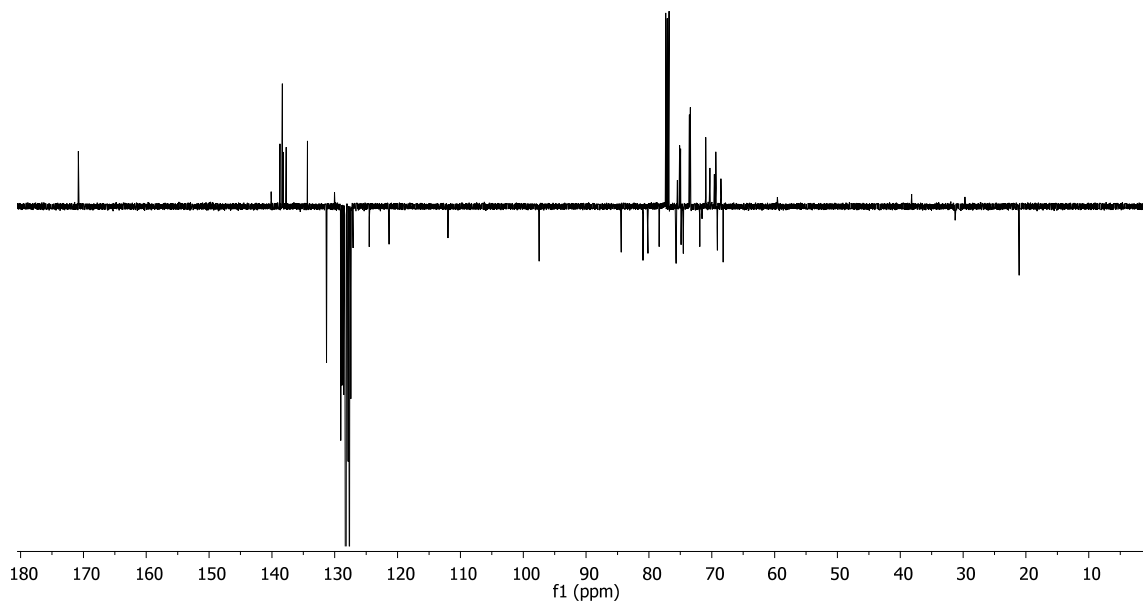

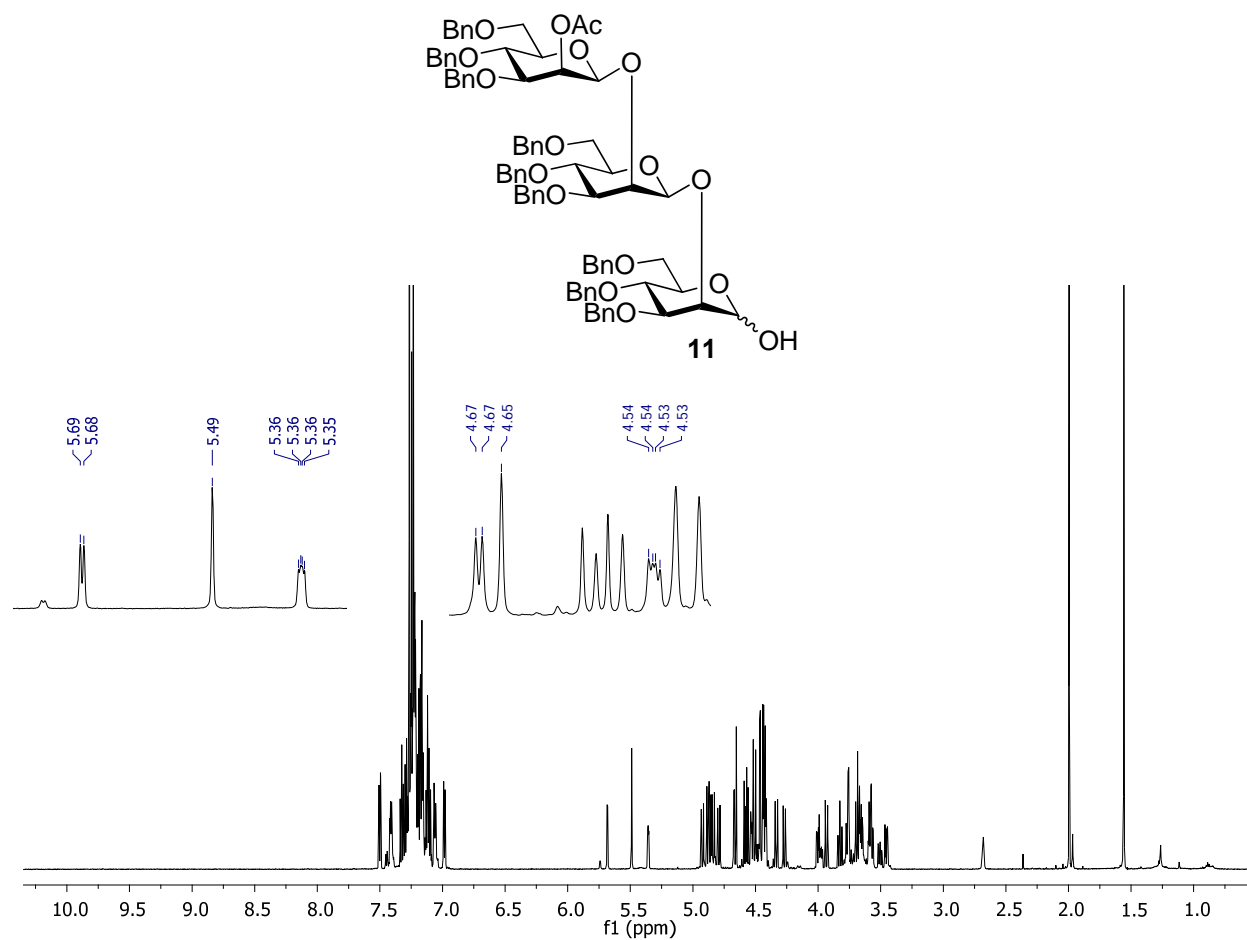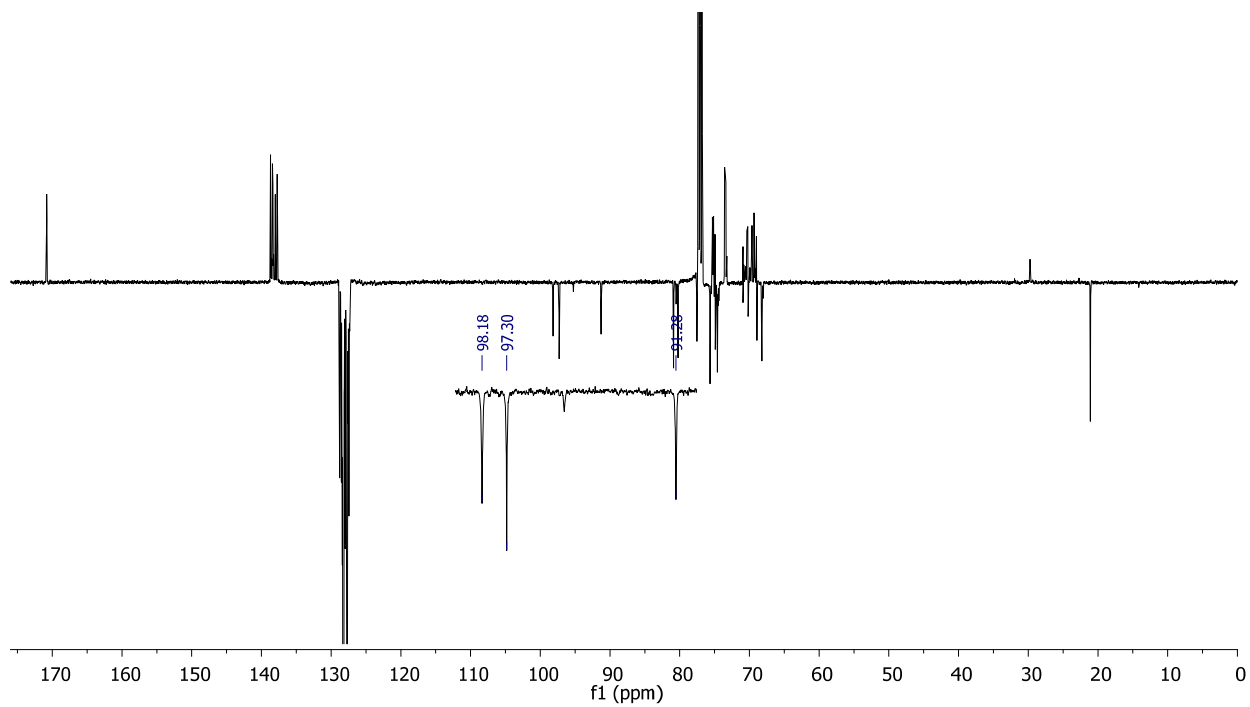



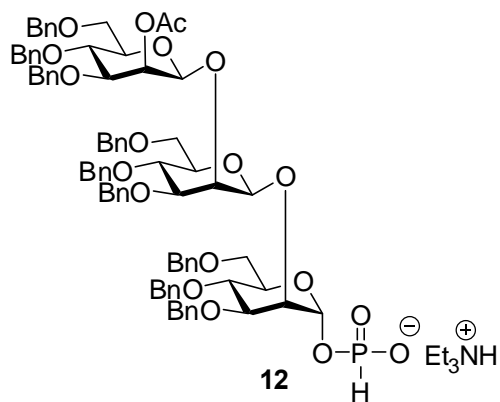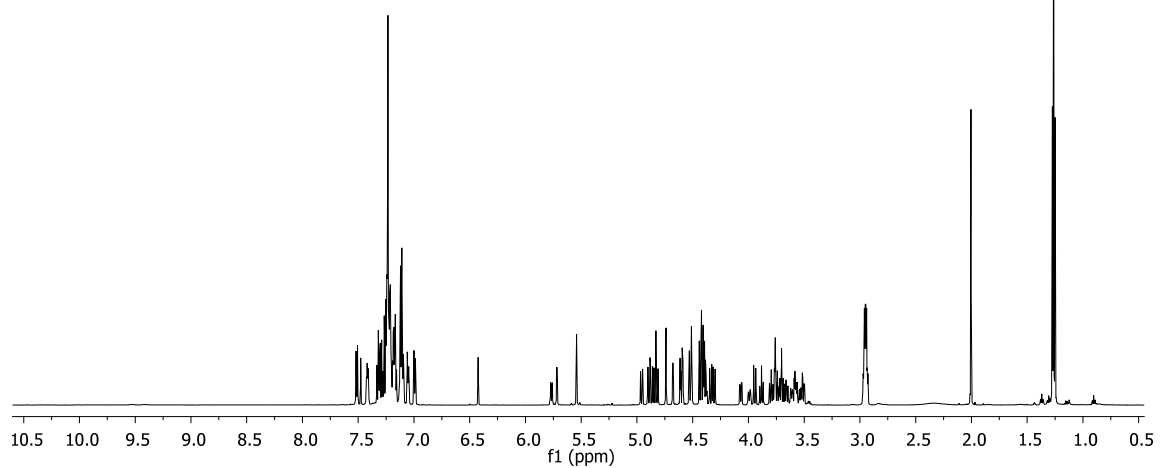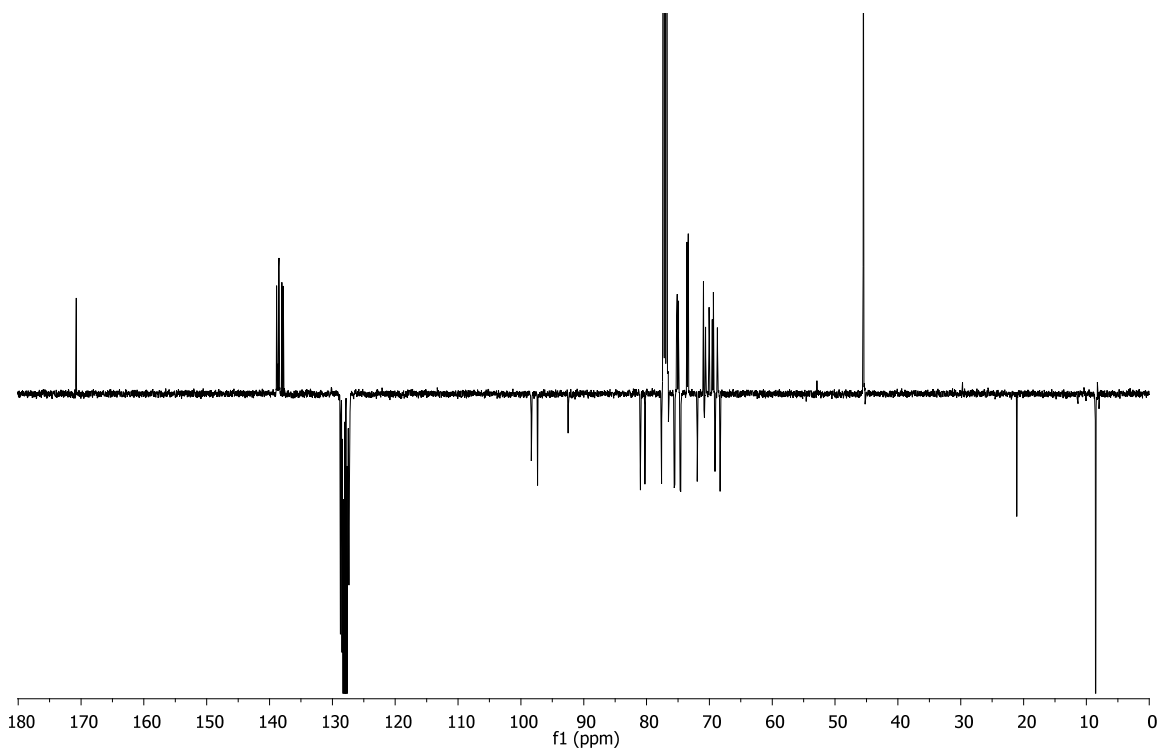

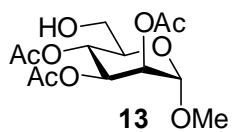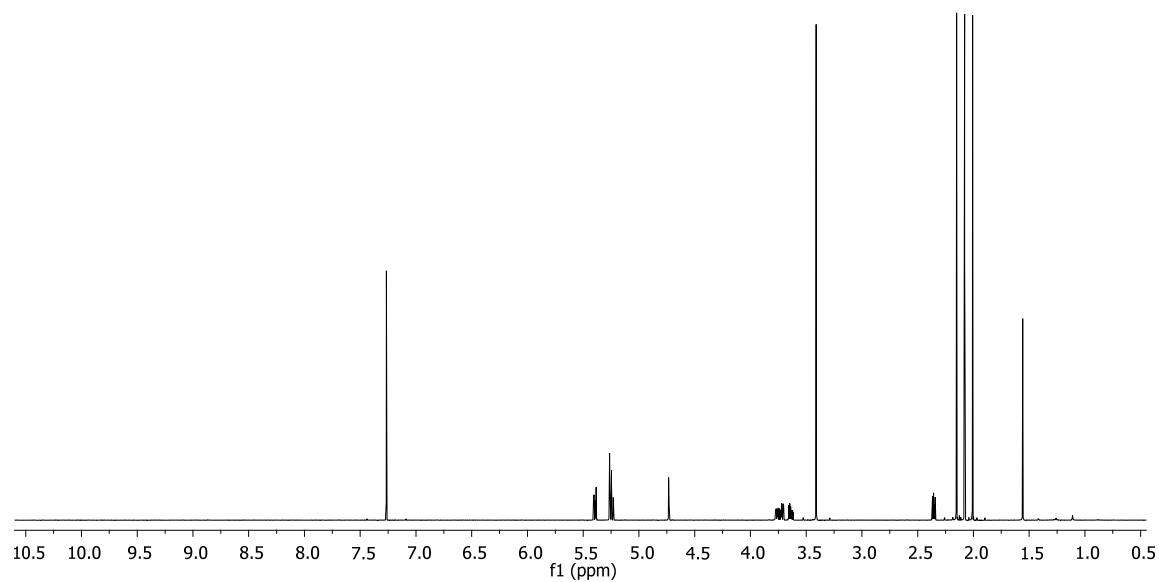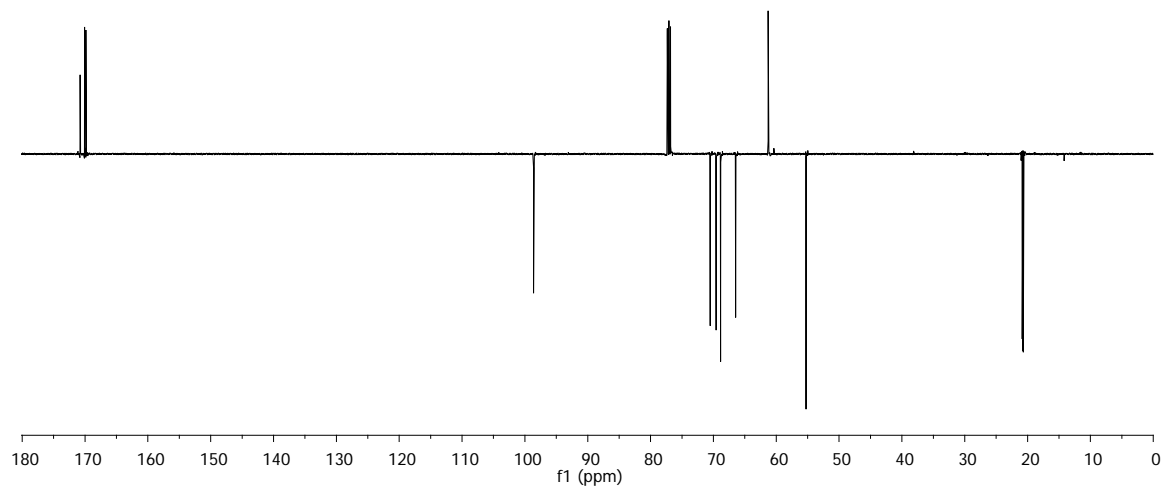

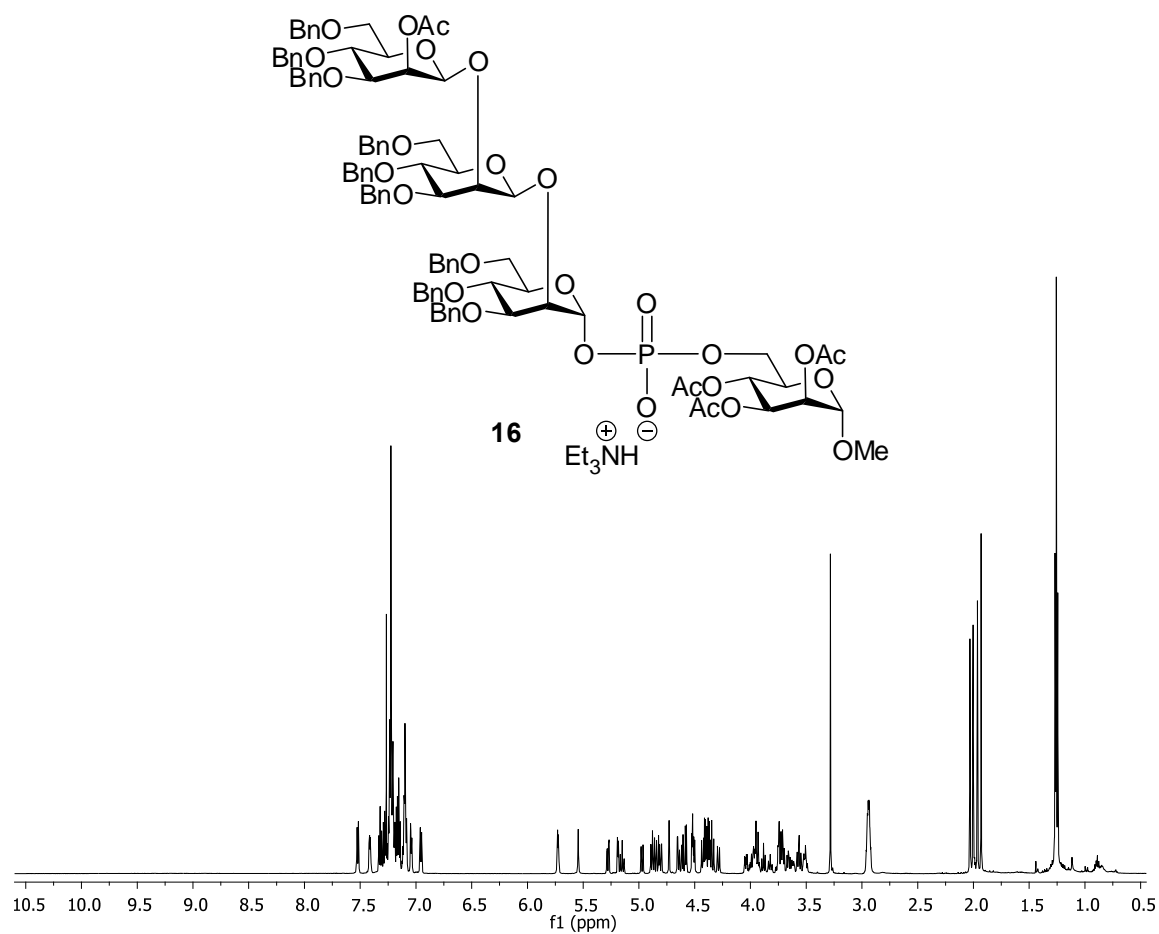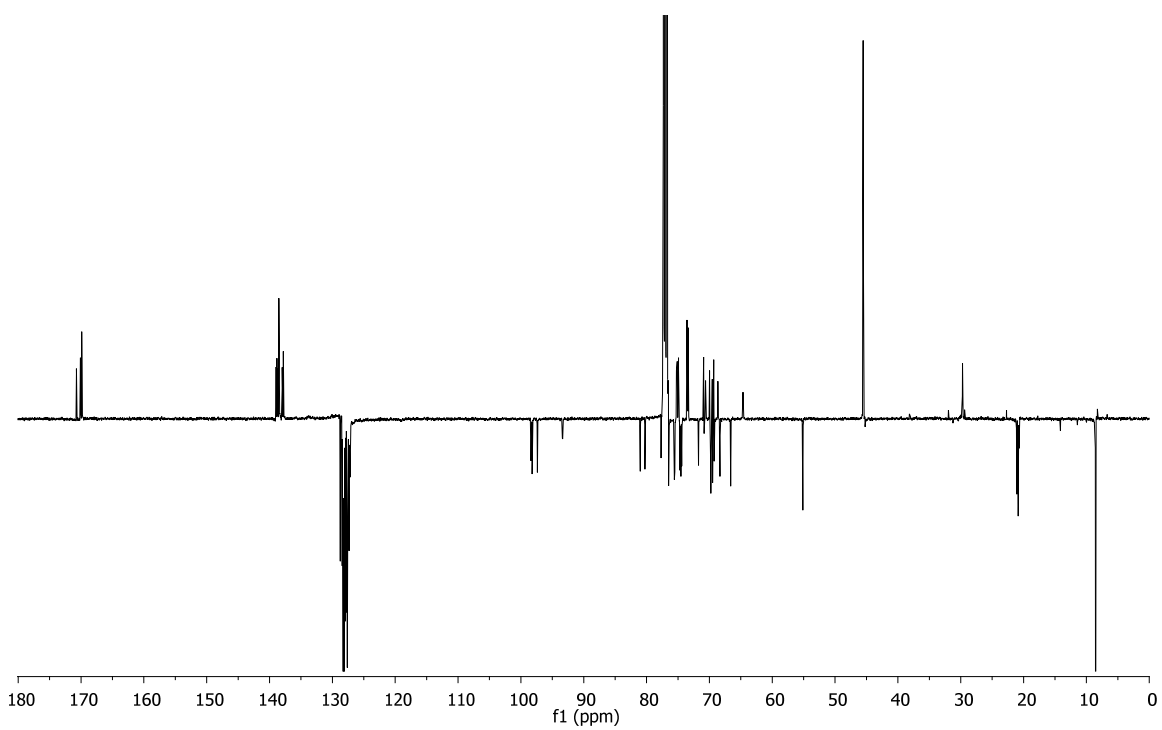

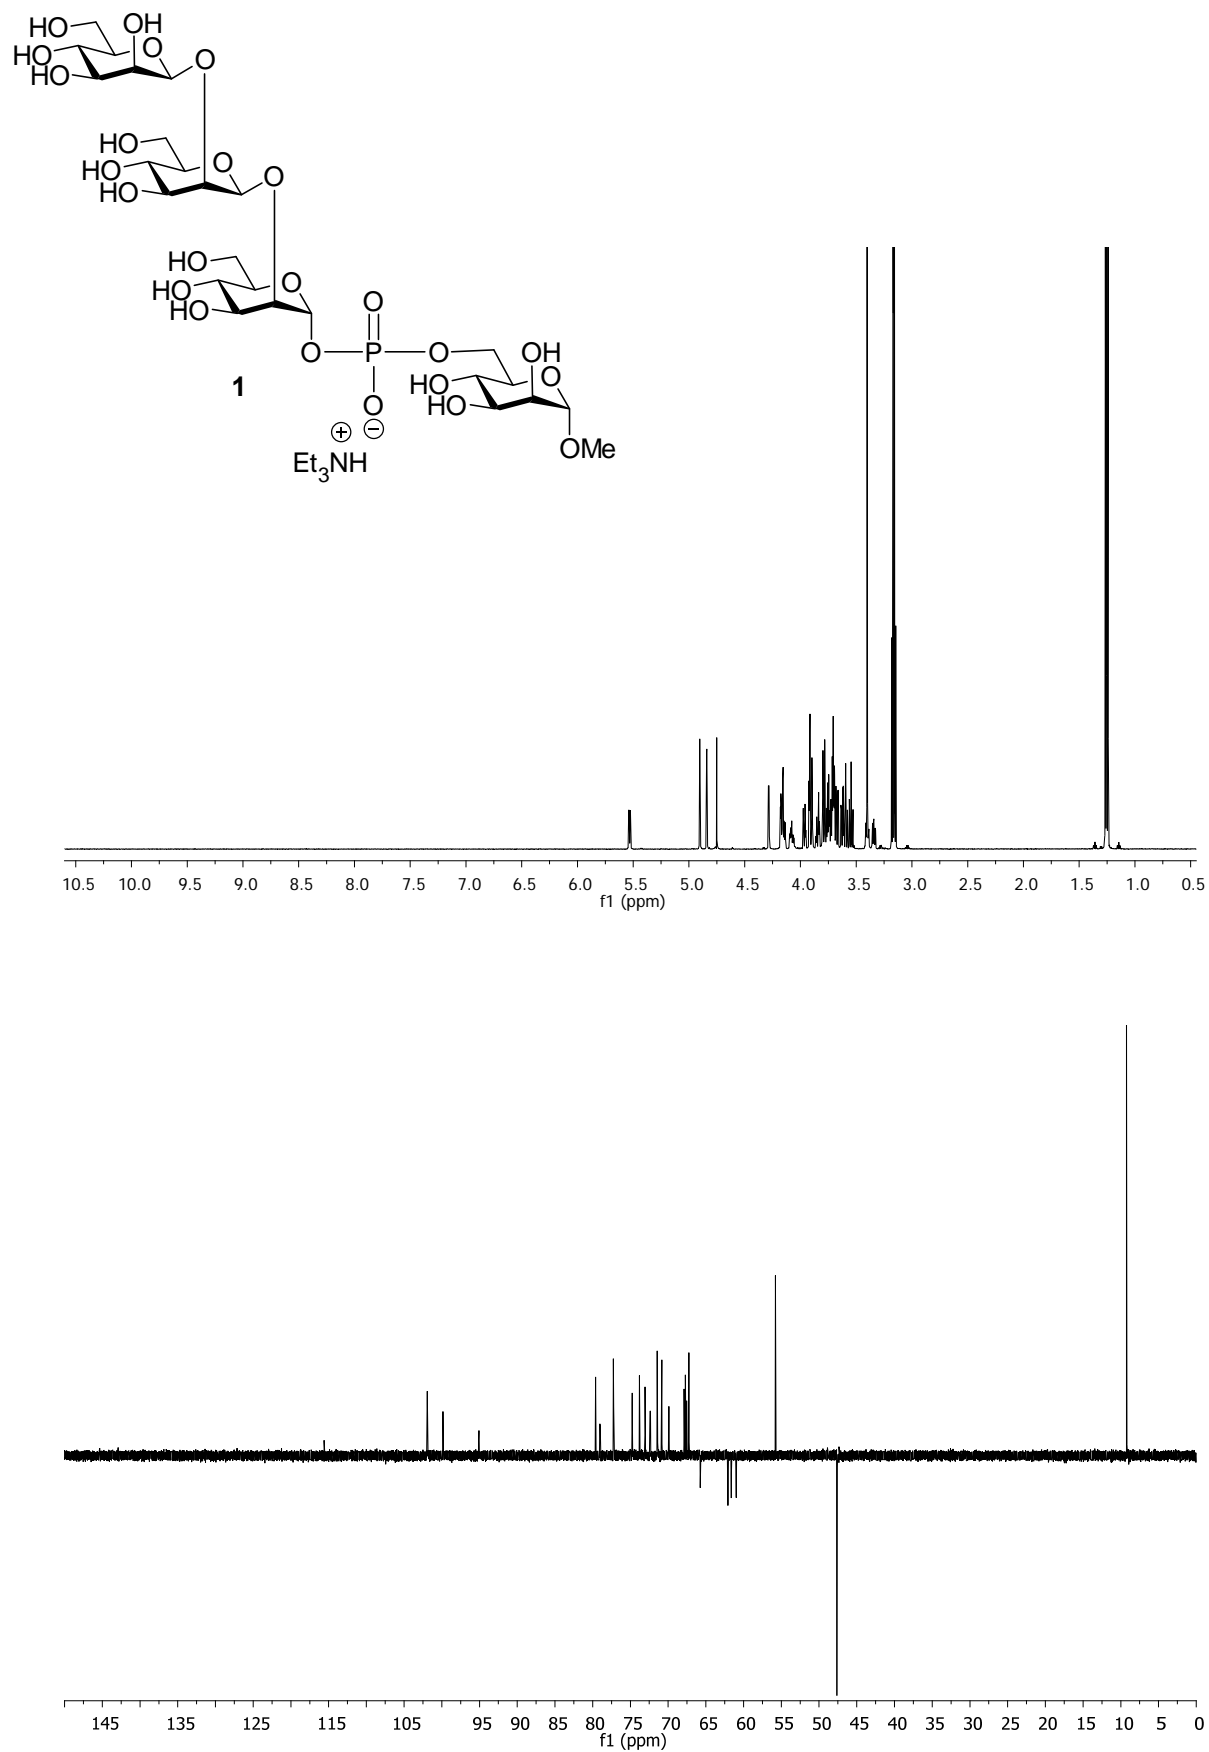

Supplement: c2ob26355f.pdf [file c2ob26355f.pdf]
